# Supplementary material for: Secreted dengue virus NS1 from infection is predominantly dimeric and in complex with high-density lipoprotein
Source: eLife journal article supplement (doi:10.7554/elife.90762), 2023-11-03
Supplement: fig1-data3 [file elife-90762-fig1-data3-v1.pdf]

Figure 1c-source data 1 Raw and annotated image for the PAGE gel stained in Coomassie Blue

Coomassie blue  
Raw image

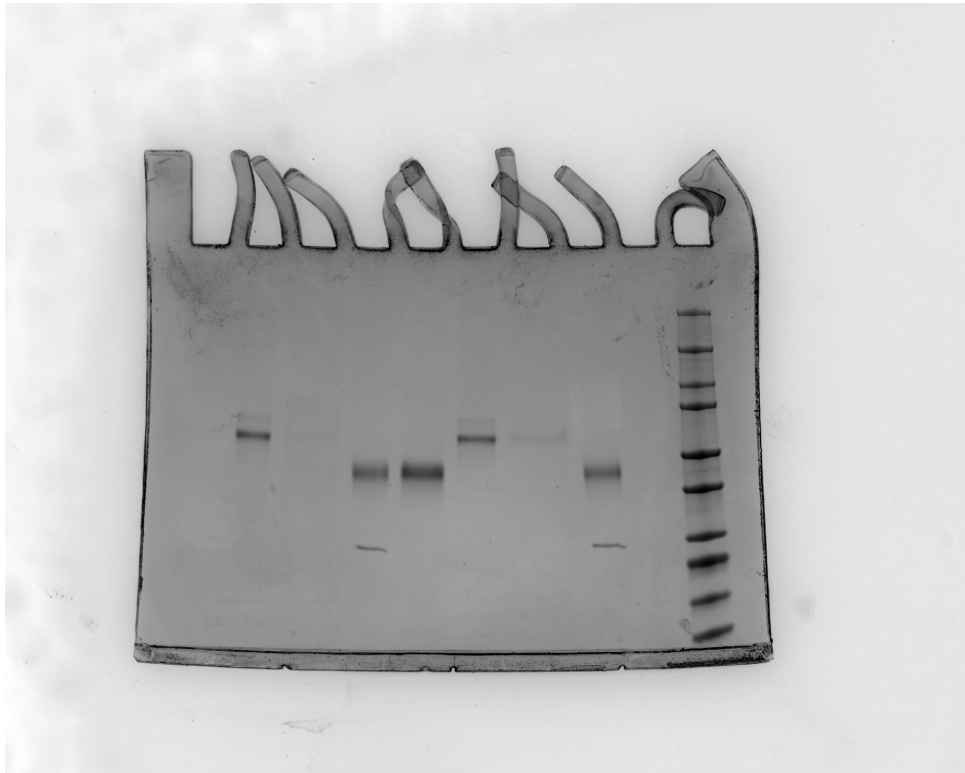

Coomassie blue  
Annotated

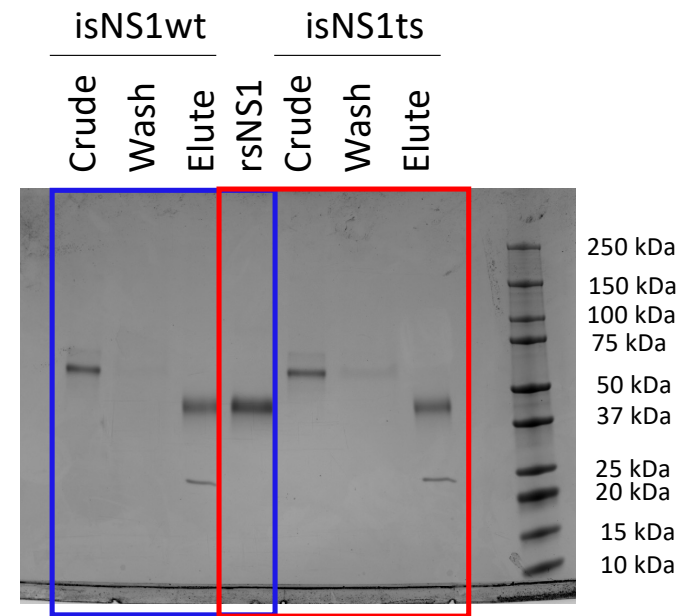

Remarks: In the annotated version, isNS1wt samples (crude, wash and elute) are shown to the left of rsNS1 (Fig. 1c) (in blue), while isNS1ts samples (crude, wash and elute) are shown to the right of rsNS1 (Supp Fig. 3b) (in red).
