# Supplementary material for: Secreted dengue virus NS1 from infection is predominantly dimeric and in complex with high-density lipoprotein
Source: eLife journal article supplement (doi:10.7554/elife.90762), 2023-11-03
Supplement: fig1-figsupp2-data2 [file elife-90762-fig1-figsupp2-data2-v1.pdf]

**Figure 1-figure supplement 2-source data 2 Raw and annotated image for the PAGE gel stained in Coomassie Blue for isNS1ts**

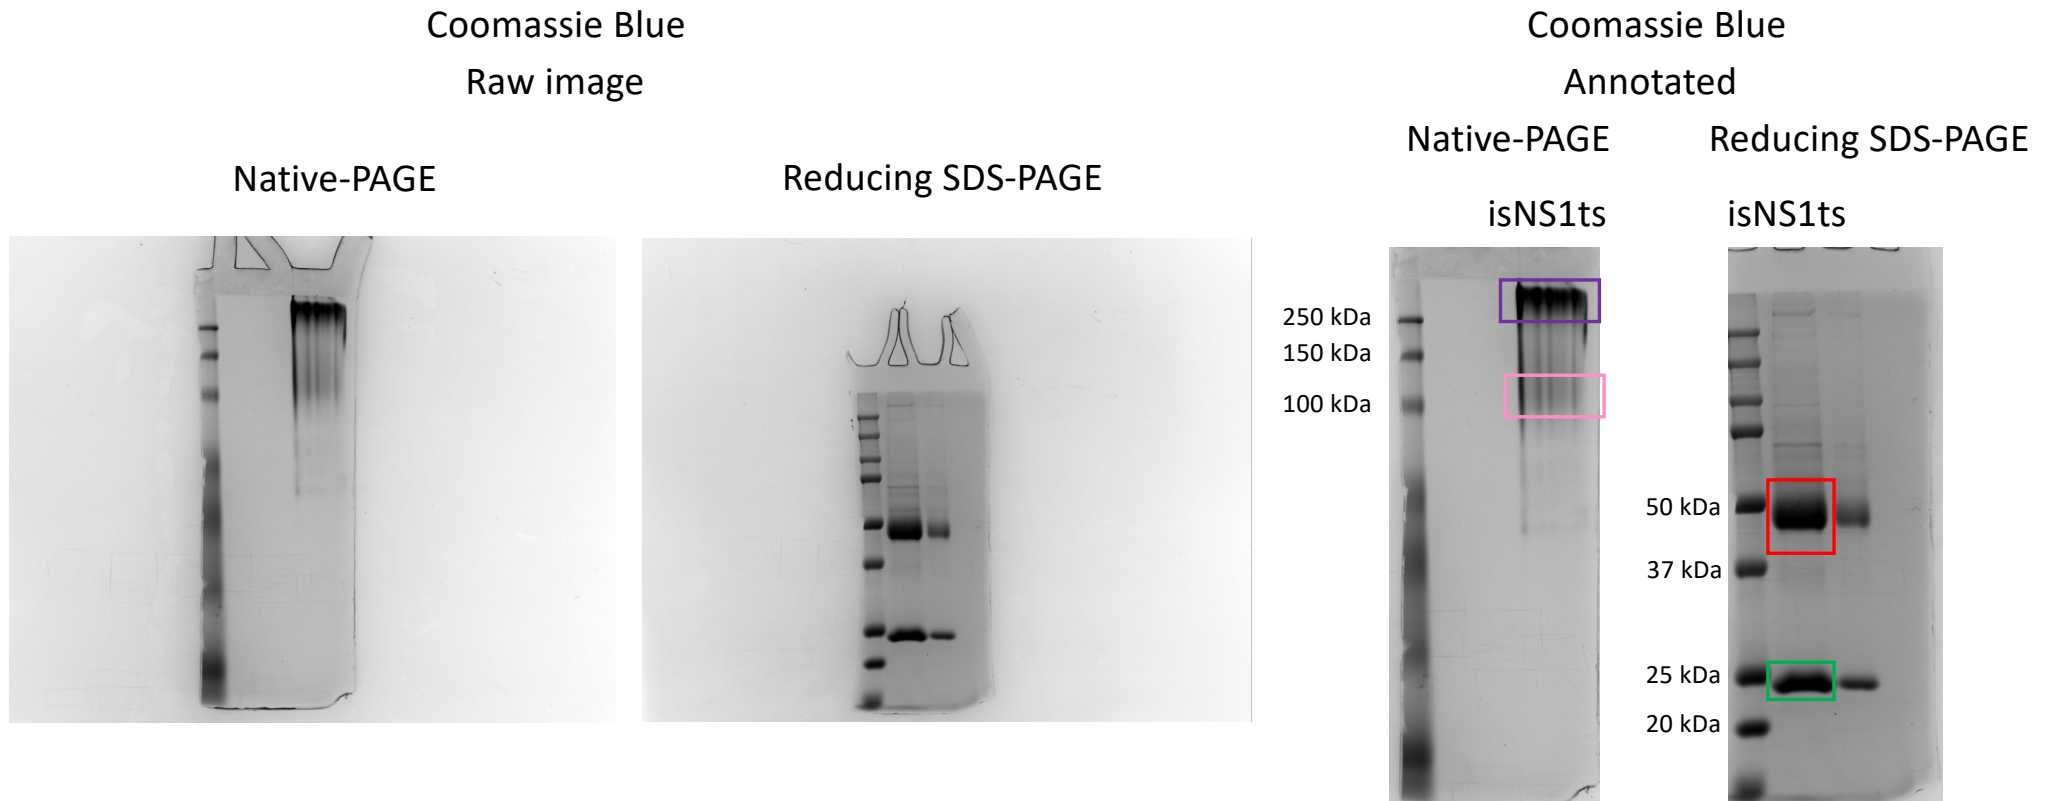

Remarks: Source data of reducing SDS-PAGE cropped gel image shown in the manuscript (red and green box) is shown in source data 3 instead
