# Supplementary material for: Secreted dengue virus NS1 from infection is predominantly dimeric and in complex with high-density lipoprotein
Source: eLife journal article supplement (doi:10.7554/elife.90762), 2023-11-03
Supplement: fig1-figsupp2-data3 [file elife-90762-fig1-figsupp2-data3-v1.pdf]

**Figure 1-figure supplement 2-source data 3 Raw and annotated image for the SDS-PAGE gel stained in Coomassie Blue for isNS1wt and isNS1ts presented in Figure 1-figure supplement 2b**

Coomassie Blue

Raw image

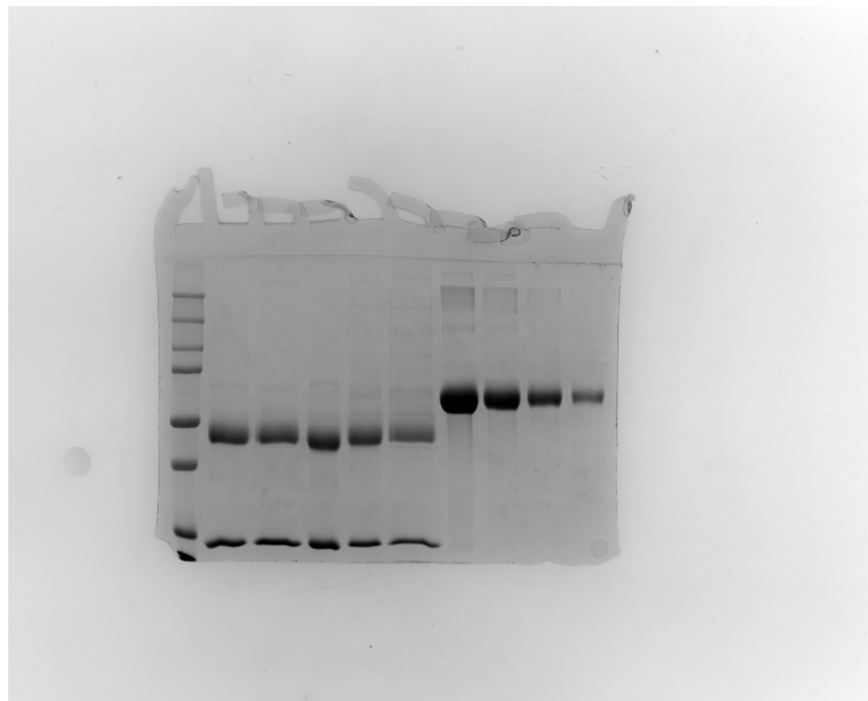

Coomassie Blue

Annotated

isNS1wt  
isNS1ts

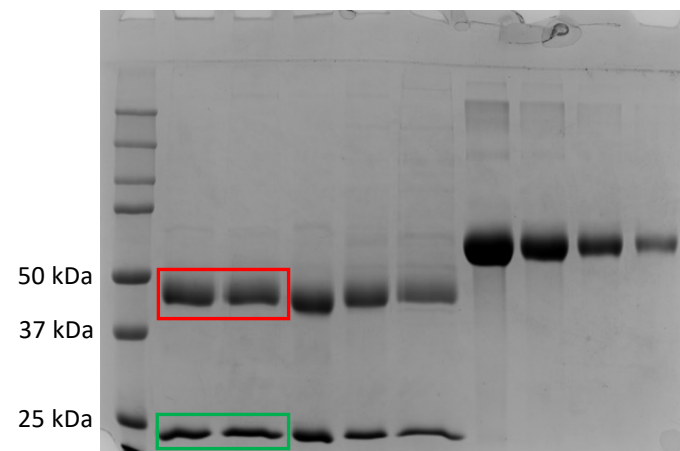

Remarks: Boxed up in red and green is the cropped gel image shown in the manuscript, this is representative of the same results shown in source data 1-2.
