# Supplementary material for: Secreted dengue virus NS1 from infection is predominantly dimeric and in complex with high-density lipoprotein
Source: eLife journal article supplement (doi:10.7554/elife.90762), 2023-11-03
Supplement: fig4-data1 [file elife-90762-fig4-data1-v1.pdf]

**Figure 4-source data 1 Raw and annotated image for the PAGE gel visualized using silver stain**

Silver Stain

Raw image

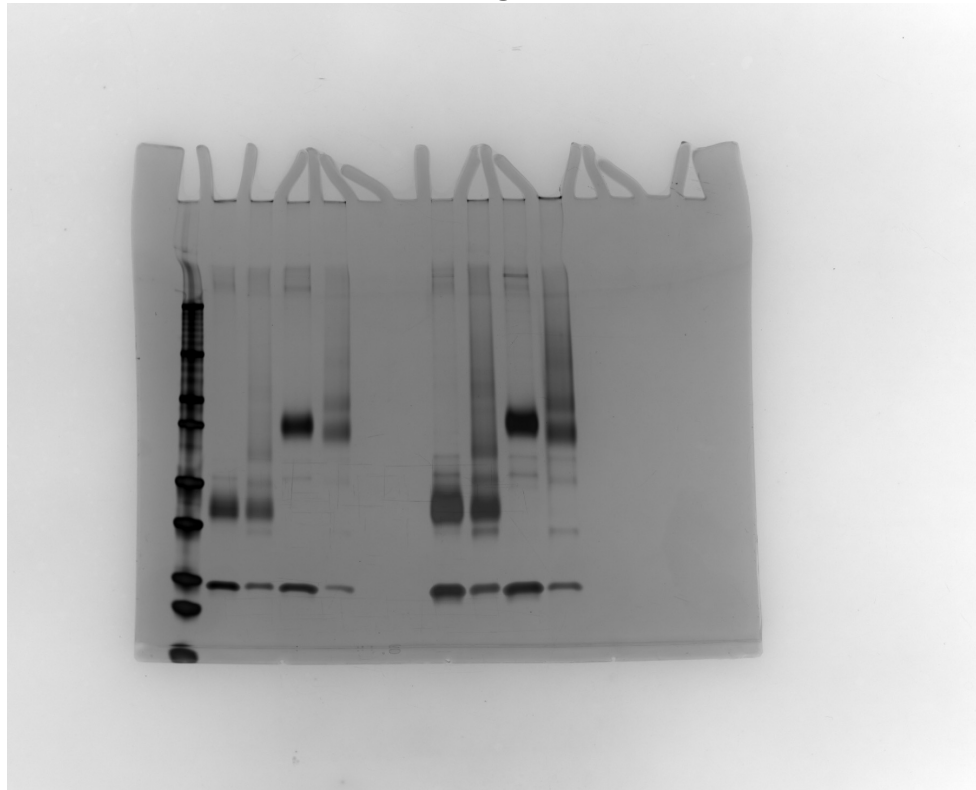

Silver Stain

Annotated

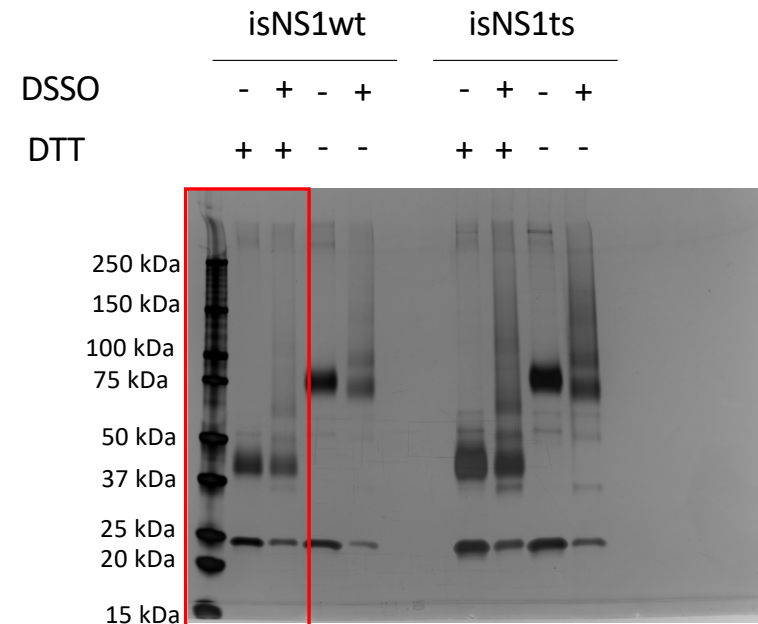

Remarks: Boxed up in red is the cropped gel image shown in the manuscript. The silver stain raw and annotated image is the same for Figure 4-figure supplement 1a for isNS1wt
