# Supplementary material for: Secreted dengue virus NS1 from infection is predominantly dimeric and in complex with high-density lipoprotein
Source: eLife journal article supplement (doi:10.7554/elife.90762), 2023-11-03
Supplement: fig4-data2 [file elife-90762-fig4-data2-v1.pdf]

Figure 4-source data 2 Raw and annotated image for the PAGE gel visualized using silver stain

Silver Stain  
Raw image

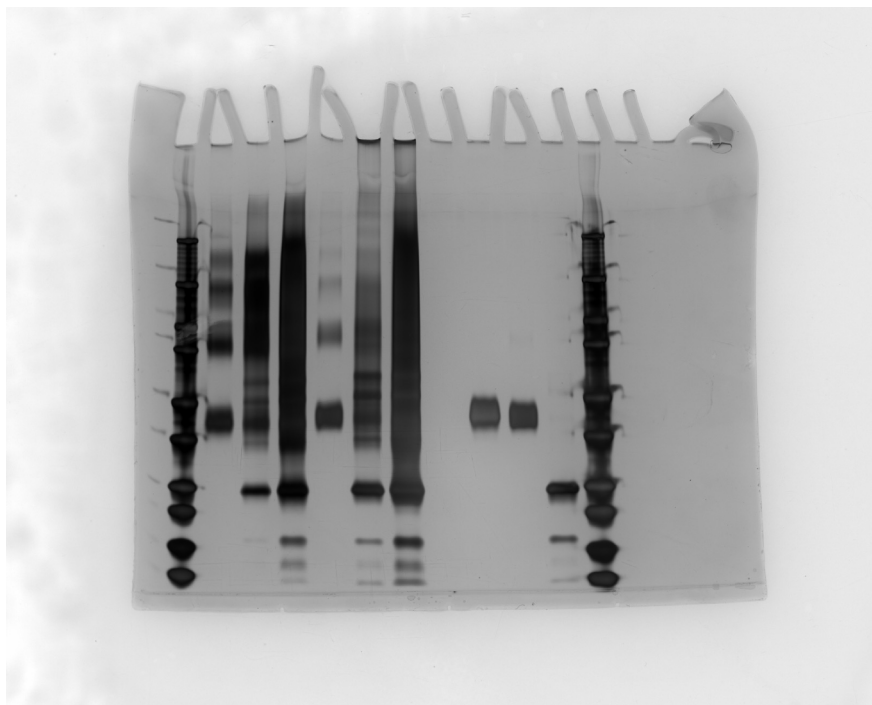

Silver Stain  
Annotated

|       |   |   |   |   |
|-------|---|---|---|---|
| rsNS1 | + | + | + | - |
| HDL   | - | + | - | + |
| DSSO  | + | + | - | - |

250 kDa  
150 kDa  
100 kDa  
75 kDa  
50 kDa  
37 kDa  
25 kDa  
20 kDa  
15 kDa

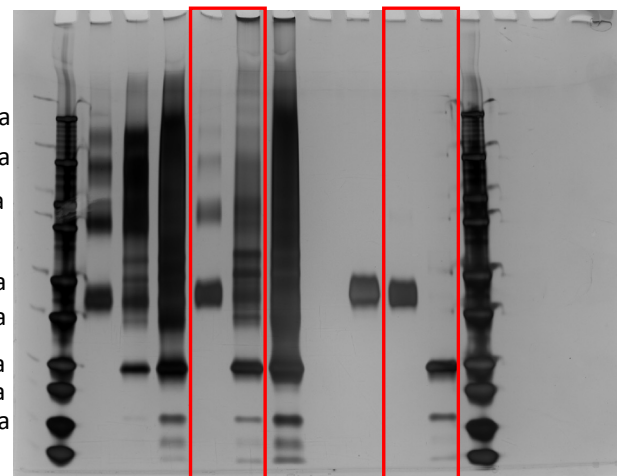

Remarks: Boxed up in red is the cropped gel image shown in the manuscript.
