# Supplementary material for: Secreted dengue virus NS1 from infection is predominantly dimeric and in complex with high-density lipoprotein
Source: eLife journal article supplement (doi:10.7554/elife.90762), 2023-11-03
Supplement: fig4-figsupp1-data1 [file elife-90762-fig4-figsupp1-data1-v1.pdf]

Figure 4-figure supplement 1-source data 1 Raw and annotated image for the western blot analysis (anti-NS1) on an SDS-PAGE gel

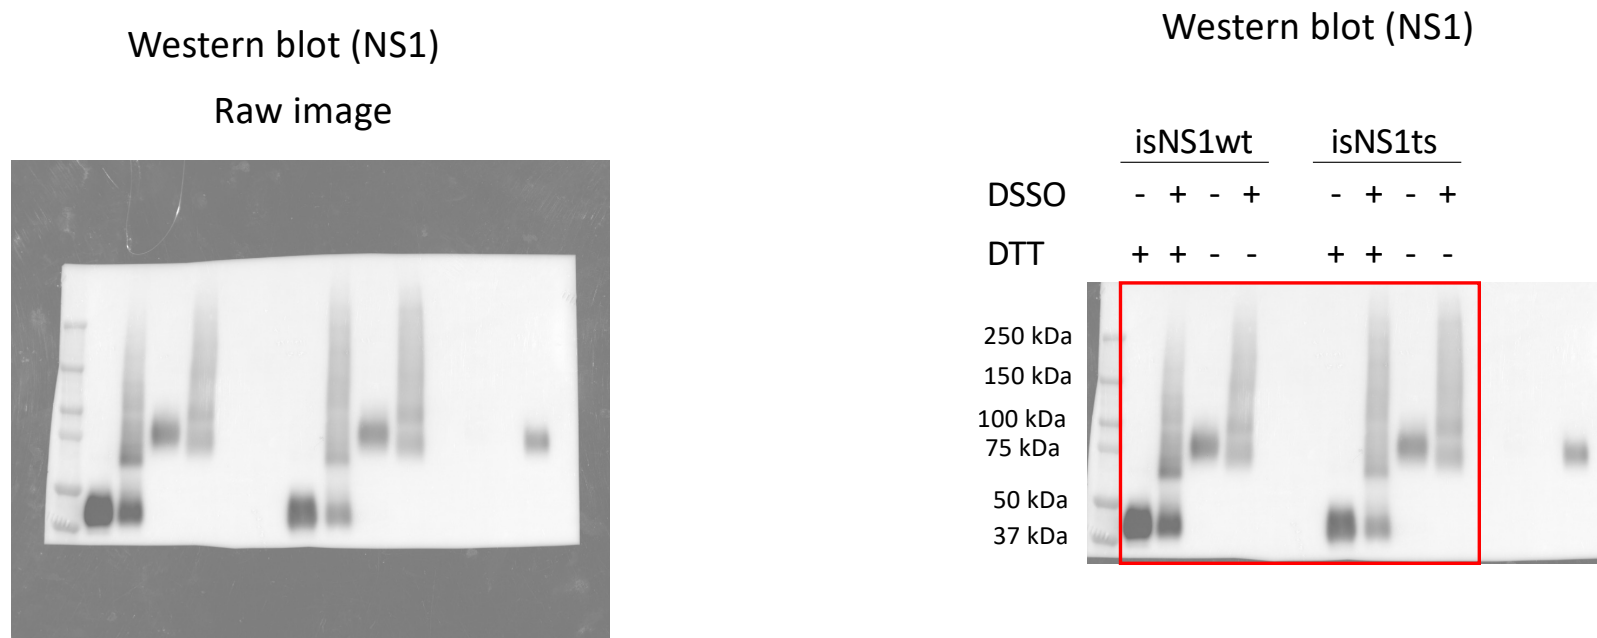

Remarks: Boxed up in red is the cropped WB image shown in the manuscript. The silver stain raw and annotated image is shown in source data for Figure 4a.
