# Supplementary material for: Secreted dengue virus NS1 from infection is predominantly dimeric and in complex with high-density lipoprotein
Source: eLife. 2024 May 24;12:RP90762. doi: 10.7554/eLife.90762 (PMC11126310; doi:10.7554/eLife.90762)
Supplement: Supplementary file 1. [file elife-90762-supp1.xlsx]

## Sheet: isNS1wt_LFQ_proteins
										Raw Abundance										Normalised abundance											% of protein in total intensity										standard deviations
Accession	Description	Coverage in Percent	Number of Peptides	Number of PSMs	Number of Unique Peptides	Number of AAs	MW in kDa	Score Mascot Mascot	Number of Peptides by Search Engine Mascot	Abundance_NS1_250kDa_R1	Abundance_NS1_250kDa_R2	Abundance F12 soluble_protein_R1	AbundanceF17_soluble_protein_R2	AbundanceF13_NS1_250kDa_DSSO_R1	AbundanceF6_NS1_250kDa_DSSO_R2	Abundance_ApoA1_band_R1	Abundance_ApoA1_bandR2	Abundance_NS1 band_R1	Abundance_NS1 band_R2	Abundance_NS1_250kDa_R1	Abundance_NS1_250kDa_R2	Abundance F12 soluble_protein_R1	AbundanceF17_soluble_protein_R2	AbundanceF13_NS1_250kDa_DSSO_R1	AbundanceF6_NS1_250kDa_DSSO_R2	Abundance_ApoA1_band_R1	Abundance_ApoA1_bandR2	Abundance_NS1 band_R1	Abundance_NS1 band_R2		Abundance_NS1_250kDa_R1	Abundance_NS1_250kDa_R2	Abundance F12 soluble_protein_R1	AbundanceF17_soluble_protein_R2	AbundanceF13_NS1_250kDa_DSSO_R1	AbundanceF6_NS1_250kDa_DSSO_R2	Abundance_ApoA1_band_R1	Abundance_ApoA1_bandR2	Abundance_NS1 band_R1	Abundance_NS1 band_R2
EU081177_NS1	NS1 Nonstructural protein 1 OS=Dengue Virus type 2 Singapore clinical isolate OX=Dengue Virus 2 DENV2 GN=D2NS1 SV=1	89	38	1577	38	352	39.9	29220	38	83300000000	116000000000	12500000000	13500000000	32800000000	35100000000	1090000000	918000000	149000000000	138000000000	83300000000	8.45624e+10	8.61938e+10	8.845e+10	5.93097e+10	6.15885e+10	1.56022e+09	1.06775e+09	1.65889e+11	1.66103e+11	NS1
P15497	Apolipoprotein A-I OS=Bos taurus OX=9913 GN=APOA1 PE=1 SV=3	84	42	1277	42	265	30.3	32661	42	69000000000	95900000000	6980000000	6860000000	49700000000	50300000000	115000000000	142000000000	1260000000	1060000000	69000000000	6.99098e+10	4.81306e+10	4.49457e+10	8.98687e+10	8.82593e+10	1.6461e+11	1.65164e+11	1.40282e+09	1.27586e+09	Mean intensity	8.39312e+10		8.73219e+10		6.04491e+10		1.31398e+09		1.65996e+11
P81644	Apolipoprotein A-II OS=Bos taurus OX=9913 GN=APOA2 PE=1 SV=2	59	6	66	6	100	11.2	1172	6	5540000000	4510000000	1510000000	1600000000	4340000000	4280000000	2790000	10300000	17300000	22400000	5540000000	3.28773e+09	1.04122e+10	1.0483e+10	7.84769e+09	7.50994e+09	3.99359e+06	1.19802e+07	1.9261e+07	2.69616e+07	stdev	8.9266e+08		1.59531e+09		1.61137e+09		3.48226e+08		1.50875e+08
Q7SIH1	Alpha-2-macroglobulin OS=Bos taurus OX=9913 GN=A2M PE=1 SV=2	64	64	341	64	1510	167.5	6762	64	3840000000	4280000000	175000000	186000000	1820000000	1920000000	9610000	7340000	14300000	11800000	3840000000	3.12006e+09	1.20671e+09	1.21864e+09	3.29097e+09	3.36895e+09	1.37557e+07	8.53736e+06	1.59209e+07	1.4203e+07
P02081	Hemoglobin fetal subunit beta OS=Bos taurus OX=9913 PE=1 SV=1	86	14	103	10	145	15.8	2169	14	1330000000	1870000000	94800000	101000000	786000000	798000000	23000000	30900000	72200000	62400000	1330000000	1.3632e+09	6.53694e+08	6.61737e+08	1.42126e+09	1.40022e+09	3.2922e+07	3.59407e+07	8.03839e+07	7.51072e+07	% in TIC	48.6983	49.4363	50.3901	51.709	34.6733	36.0055	0.912124	0.624222	96.981	97.1058
P12763	Alpha-2-HS-glycoprotein OS=Bos taurus OX=9913 GN=AHSG PE=1 SV=2	49	12	86	12	359	38.4	2107	12	1300000000	1760000000	234000000	248000000	564000000	591000000	13400000	13500000	279000000	213000000	1300000000	1.28302e+09	1.61355e+09	1.62486e+09	1.01984e+09	1.037e+09	1.91807e+07	1.57022e+07	3.10625e+08	2.56376e+08	Mean %	49.0673		51.0496		35.3394		0.768173		97.0434
E1BAU6	Inositol polyphosphate-5-phosphatase E OS=Bos taurus OX=9913 GN=INPP5E PE=4 SV=1	1	1	15	1	656	71.9	241	1	1130000000	3030000000	2410000000	2720000000	1880000000	1600000000	1700000000	2310000000	1840000000	1890000000	1130000000	2.20883e+09	1.66182e+10	1.7821e+10	3.39946e+09	2.80745e+09	2.43337e+09	2.68683e+09	2.04856e+09	2.27488e+09	stdev	0.521861		0.932641		0.942027		0.203578		0.0882033
P01966	Hemoglobin subunit alpha OS=Bos taurus OX=9913 GN=HBA PE=1 SV=2	82	8	43	8	142	15.2	721	8	666000000	819000000	36900000	37700000	247000000	286000000	3250000	2270000	42100000	36200000	666000000	5.9704e+08	2.54444e+08	2.47005e+08	4.46631e+08	5.01832e+08	4.65203e+06	2.6403e+06	4.6872e+07	4.35718e+07	ApoA1
Q58D62	Fetuin-B OS=Bos taurus OX=9913 GN=FETUB PE=1 SV=1	49	12	66	12	387	42.6	1365	12	588000000	824000000	69800000	74000000	298000000	297000000	8250000	6760000	159000000	139000000	588000000	6.00685e+08	4.81306e+08	4.84837e+08	5.3885e+08	5.21134e+08	1.1809e+07	7.86274e+06	1.77023e+08	1.67306e+08	Mean intensity	6.94549e+10		4.65382e+10		8.9064e+10		1.64887e+11		1.33934e+09
P01017	Angiotensinogen OS=Bos taurus OX=9913 GN=AGT PE=1 SV=2	69	19	59	19	476	51.4	1061	19	561000000	395000000	24900000	21800000	143000000	199000000	241000	38900	6490000	7140000	561000000	2.8795e+08	1.71698e+08	1.4283e+08	2.58576e+08	3.49177e+08	344966	45245.7	7.22564e+06	8.594e+06	stdev	6.43316e+08		2.25211e+09		1.13797e+09		3.91756e+08		8.9775e+07
P34955	Alpha-1-antiproteinase OS=Bos taurus OX=9913 GN=SERPINA1 PE=1 SV=1	32	10	45	10	416	46.1	847	10	447000000	554000000	94500000	99300000	206000000	216000000	565000	19000000	22100000	22300000	447000000	4.03858e+08	6.51625e+08	6.50599e+08	3.72494e+08	3.79006e+08	808737	2.20994e+07	2.4605e+07	2.68412e+07	% in TIC	40.3383	40.8702	28.1378	26.2758	52.5384	51.5976	96.2333	96.5572	0.820108	0.745885
A0A3Q1MBE4	Exportin 5 OS=Bos taurus OX=9913 GN=XPO5 PE=4 SV=1	1	1	10	1	1158	131.8	248	1	418000000	1270000000	149000000	145000000	465000000	444000000	1090000000	1190000000	6220000	4970000	418000000	9.25813e+08	1.02743e+09	9.50018e+08	8.40824e+08	7.79069e+08	1.56022e+09	1.38412e+09	6.92504e+06	5.9821e+06	Mean %	40.6043		26.973		51.786		96.2258		0.781433
P02769	Albumin OS=Bos taurus OX=9913 GN=ALB PE=1 SV=4	34	18	96	18	607	69.2	2445	18	366000000	489000000	89200000	98400000	182000000	178000000	26600000	26700000	36700000	23400000	366000000	3.56474e+08	6.15079e+08	6.44702e+08	3.29097e+08	3.12329e+08	3.8075e+07	3.10555e+07	4.08599e+07	2.81652e+07	stdev	0.376091		1.24451		0.284738		0.26506		0.0532436
A0A3Q1LK49	Inter-alpha-trypsin inhibitor heavy chain H2 OS=Bos taurus OX=9913 GN=ITIH2 PE=1 SV=1	39	22	78	22	864	96.7	1620	22	336000000	364000000	37700000	45000000	109000000	114000000	1800000	1070000	11500000	9430000	336000000	2.65351e+08	2.59961e+08	2.94833e+08	1.97096e+08	2.00031e+08	2.57651e+06	1.24455e+06	1.28035e+07	1.13503e+07
Q3SZ57	Alpha-fetoprotein OS=Bos taurus OX=9913 GN=AFP PE=2 SV=1	39	15	51	15	610	68.5	1300	15	283000000	266000000	40400000	43800000	114000000	129000000	527000	181000	29100000	5300000	283000000	1.9391e+08	2.78578e+08	2.86971e+08	2.06137e+08	2.26351e+08	754344	210526	3.23985e+07	6.3793e+06
P81187	Complement factor B OS=Bos taurus OX=9913 GN=CFB PE=1 SV=2	35	18	53	18	761	85.3	1077	18	273000000	351000000	12400000	12100000	108000000	149000000	273000	393000	517000	683000	273000000	2.55874e+08	8.55043e+07	7.92774e+07	1.95288e+08	2.61444e+08	390770	457109	575602	822087	Median intensity	88700000	5.83918e+07	8.1367e+07	7.92774e+07	1.01441e+08	1.18439e+08	6.91363e+06	8.03721e+06	1.63662e+07	1.4203e+07
E1B7N8	Histone domain-containing protein OS=Bos taurus OX=9913 PE=3 SV=2	13	2	5	1	131	14.3	114	2	236000000	341000000	3350000	3460000	149000000	129000000	13600000	18200000	14700000	12400000	236000000	2.48584e+08	2.30999e+07	2.26694e+07	2.69425e+08	2.26351e+08	1.94669e+07	2.11689e+07	1.63662e+07	1.49252e+07	stdev	2.14311e+07		1.47758e+06		1.20195e+07		794497		1.52967e+06
Q2UVX4	Complement C3 OS=Bos taurus OX=9913 GN=C3 PE=1 SV=2	30	29	73	29	1661	187.1	1617	29	189000000	182000000	6450000	6990000	56100000	71100000	814000	939000	6180000	4920000	189000000	1.32676e+08	4.4476e+07	4.57974e+07	1.01441e+08	1.24756e+08	1.16515e+06	1.09218e+06	6.8805e+06	5.92192e+06	mean median	7.35459e+07		8.03222e+07		1.0994e+08		7.47542e+06		1.52846e+07
G3N0V2	Cytokeratin-1 OS=Bos taurus OX=9913 GN=KRT1 PE=1 SV=2	9	6	52	3	606	63.1	1179	6	176000000	169000000	41600000	29600000	56600000	68500000	132000000	101000000	214000000	68400000	176000000	1.23199e+08	2.86853e+08	1.93935e+08	1.02345e+08	1.20194e+08	1.88944e+08	1.17476e+08	2.38257e+08	8.23291e+07
A6QNZ7	Keratin 10 (Epidermolytic hyperkeratosis; keratosis palmaris et plantaris) OS=Bos taurus OX=9913 GN=KRT10 PE=2 SV=1	13	9	50	7	526	54.8	1022	9	146000000	297000000	75400000	65800000	72800000	67500000	161000000	138000000	193000000	142000000	146000000	2.16509e+08	5.19921e+08	4.31112e+08	1.31639e+08	1.18439e+08	2.30454e+08	1.60512e+08	2.14877e+08	1.70917e+08
Q2KIH2	ApoN protein OS=Bos taurus OX=9913 GN=APON PE=2 SV=1	24	6	26	6	254	28.5	469	6	106000000	250000000	81600000	87000000	112000000	110000000	4830000	4660000	6880000	4560000	106000000	1.82247e+08	5.62673e+08	5.70011e+08	2.02521e+08	1.93012e+08	6.91363e+06	5.42018e+06	7.65985e+06	5.48861e+06
P00760	Cationic trypsin OS=Bos taurus OX=9913 PE=1 SV=3	10	1	2	1	246	25.8	23	1	88700000	66400000	48500000	39000000	67200000	98400000	66900000	85700000	65200000	48200000	88700000	4.84047e+07	3.34432e+08	2.55522e+08	1.21513e+08	1.72658e+08	9.57602e+07	9.96801e+07	7.25904e+07	5.80155e+07	TIC	171053210000	1.71053e+11	1.71053e+11	1.71053e+11	171053210000	1.71053e+11	1.71053e+11	171053210000	1.71053e+11	1.71053e+11
Q95121	Pigment epithelium-derived factor OS=Bos taurus OX=9913 GN=SERPINF1 PE=1 SV=1	31	7	26	7	416	46.2	650	7	75500000	54100000	2090000	2700000	26900000	31500000	102000	1330000	43300000	68600000	75500000	3.94382e+07	1.44116e+07	1.769e+07	4.86412e+07	5.52718e+07	146002	1.54696e+06	4.82081e+07	8.25698e+07
G5E513	Uncharacterized protein OS=Bos taurus OX=9913 PE=1 SV=2	38	9	29	3	439	48.1	703	9	75200000	52500000	1310000	1050000	37500000	35400000	6840000	8200000	5790000	9740000	75200000	3.82718e+07	9.03311e+06	6.87944e+06	6.78084e+07	6.21149e+07	9.79072e+06	9.53765e+06	6.4463e+06	1.17235e+07
F1MFW9	Keratin 24 OS=Bos taurus OX=9913 GN=KRT24 PE=3 SV=3	5	3	29	2	525	55.1	681	3	66900000	52500000	2990000	2330000	10100000	14100000	27600000	35000000	28100000	26300000	66900000	3.82718e+07	2.06176e+07	1.52658e+07	1.82631e+07	2.47407e+07	3.95064e+07	4.07095e+07	3.12851e+07	3.16558e+07
M0QVZ6	Keratin, type II cytoskeletal 5 OS=Bos taurus OX=9913 GN=KRT5 PE=3 SV=2	6	3	19	0	594	62.6	443	3	66400000	29200000	10600000	5370000	14400000	20300000	37800000	41800000	38800000	30000000	66400000	2.12864e+07	7.30924e+07	3.51834e+07	2.60384e+07	3.56196e+07	5.41066e+07	4.86187e+07	4.3198e+07	3.61092e+07
Q32PA1	CD59 glycoprotein OS=Bos taurus OX=9913 GN=CD59 PE=2 SV=1	9	1	6	1	121	13.7	94	1	64300000	50200000	11800000	12200000	35900000	31500000	1310000	1450000	11300000	8010000	64300000	3.65951e+07	8.1367e+07	7.99326e+07	6.49152e+07	5.52718e+07	1.87512e+06	1.68654e+06	1.25809e+07	9.64117e+06
F1MUY2	IF rod domain-containing protein OS=Bos taurus OX=9913 GN=KRT6B PE=3 SV=1	7	4	24	1	571	60.8	649	4	63400000	17900000	6780000	4890000	7800000	11200000	26900000	29500000	29700000	20600000	63400000	1.30489e+07	4.67515e+07	3.20385e+07	1.41041e+07	1.96522e+07	3.85045e+07	3.43123e+07	3.30665e+07	2.4795e+07
A0A3Q1MEU7	Histone H2B OS=Bos taurus OX=9913 GN=H2BC3 PE=3 SV=1	19	2	23	1	126	14	814	2	61100000	45000000	875000	1000000	38000000	43300000	2370000	3400000	2810000	2660000	61100000	3.28044e+07	6.03357e+06	6.55185e+06	6.87125e+07	7.59767e+07	3.3924e+06	3.95463e+06	3.12851e+06	3.20169e+06
P60712	Actin, cytoplasmic 1 OS=Bos taurus OX=9913 GN=ACTB PE=1 SV=1	45	11	38	6	375	41.7	887	11	53600000	80100000	19000000	20700000	28600000	26900000	5460000	8010000	90900000	85700000	53600000	5.83918e+07	1.31015e+08	1.35623e+08	5.17152e+07	4.72003e+07	7.8154e+06	9.31665e+06	1.01204e+08	1.03152e+08
P08169	Cation-independent mannose-6-phosphate receptor OS=Bos taurus OX=9913 GN=IGF2R PE=1 SV=2	8	12	26	12	2499	274.4	423	12	42000000	55900000	1780000	1800000	22400000	23800000	198000	123000	420000	450000	42000000	4.07503e+07	1.2274e+07	1.17933e+07	4.05042e+07	4.17609e+07	283416	143065	467607	541639
A0A3Q1MF62	Histone H2A OS=Bos taurus OX=9913 GN=H2AC12 PE=3 SV=1	41	3	13	1	140	15.1	515	3	37800000	76800000	2670000	2960000	37900000	33900000	9810000	11000000	4260000	4290000	37800000	5.59861e+07	1.8411e+07	1.93935e+07	6.85316e+07	5.94829e+07	1.4042e+07	1.27944e+07	4.74287e+06	5.16362e+06
Q29S21	Keratin, type II cytoskeletal 7 OS=Bos taurus OX=9913 GN=KRT7 PE=2 SV=1	5	2	17	1	466	51.5	326	2	32100000	17700000	2350000	1510000	14800000	19500000	13500000	20400000	20700000	12800000	32100000	1.29031e+07	1.62044e+07	9.89329e+06	2.67617e+07	3.42158e+07	1.93238e+07	2.37278e+07	2.30463e+07	1.54066e+07
P53712	Integrin beta-1 OS=Bos taurus OX=9913 GN=ITGB1 PE=1 SV=3	10	5	12	5	798	88	236	5	18200000	21500000	7560000	8140000	11500000	11200000	147000	30900	509000	708000	18200000	1.56732e+07	5.213e+07	5.3332e+07	2.07946e+07	1.96522e+07	210415	35940.7	566695	852178
A0A3Q1NKP5	Uncharacterized protein OS=Bos taurus OX=9913 GN=ACTBL2 PE=1 SV=1	24	6	28	1	376	41.8	623	6	17700000	34300000	4130000	2850000	9000000	7800000	1840000	2030000	30900000	27400000	17700000	2.50042e+07	2.84784e+07	1.86728e+07	1.6274e+07	1.36863e+07	2.63376e+06	2.36115e+06	3.44025e+07	3.29798e+07
A5D984	Pyruvate kinase OS=Bos taurus OX=9913 GN=PKM PE=1 SV=1	8	3	9	3	531	57.9	161	3	15300000	8230000	602000	127000	2340000	5730000	989000	491000	1410000	267000	15300000	5.99956e+06	4.1511e+06	832085	4.23124e+06	1.00542e+07	1.41565e+06	571096	1.56982e+06	321372
F1MP21	Alpha-amylase OS=Bos taurus OX=9913 GN=LOC539383 PE=3 SV=3	6	3	9	3	511	57	128	3	9340000	12000000	3980000	4630000	6380000	5690000	2690000	3160000	2830000	2630000	9340000	8.74784e+06	2.74441e+07	3.03351e+07	1.15365e+07	9.98401e+06	3.85045e+06	3.67548e+06	3.15078e+06	3.16558e+06
F1MVK1	C4a anaphylatoxin OS=Bos taurus OX=9913 GN=LOC107131209 PE=4 SV=3	4	4	13	4	1735	192.1	277	4	7960000	5940000	410000	355000	3200000	3670000	1140000	1110000	7110000	6520000	7960000	4.33018e+06	2.82716e+06	2.32591e+06	5.78631e+06	6.4396e+06	1.63179e+06	1.29107e+06	7.91592e+06	7.84774e+06
F1MC11	Keratin, type I cytoskeletal 14 OS=Bos taurus OX=9913 GN=KRT14 PE=1 SV=3	6	4	35	2	515	55.9	971	4	7120000	14900000	9950000	9510000	5570000	5380000	8500000	6910000	13400000	11500000	7120000	1.08619e+07	6.86103e+07	6.23081e+07	1.00718e+07	9.44006e+06	1.21668e+07	8.03721e+06	1.49189e+07	1.38419e+07
Q0VCM5	Inter-alpha-trypsin inhibitor heavy chain H1 OS=Bos taurus OX=9913 GN=ITIH1 PE=1 SV=1	6	3	5	3	906	101.2	138	3	6800000	11700000	91200	183000	4200000	4890000	2670000	2720000	1430000	72800	6800000	8.52914e+06	628870	1.19899e+06	7.59454e+06	8.58028e+06	3.82182e+06	3.16371e+06	1.59209e+06	87625.1
A0A3Q1MIY8	2-phospho-D-glycerate hydro-lyase OS=Bos taurus OX=9913 GN=ENO2 PE=3 SV=1	5	1	4	1	427	46.6	145	1	5890000	1670000	704000	180000	389000	1300000	1420000	877000	2220000	782000	5890000	1.21741e+06	4.85444e+06	1.17933e+06	703399	2.28106e+06	2.03258e+06	1.02006e+06	2.47164e+06	941248
P68103	Elongation factor 1-alpha 1 OS=Bos taurus OX=9913 GN=EEF1A1 PE=1 SV=1	8	3	7	3	462	50.1	126	3	5230000	10400000	805000	719000	2490000	926000	42000	65500	5570000	5360000	5230000	7.58146e+06	5.55088e+06	4.71078e+06	4.50247e+06	1.62481e+06	60118.5	76184.9	6.20136e+06	6.45152e+06
A0A3Q1N666	Histone H4 OS=Bos taurus OX=9913 PE=3 SV=1	10	1	1	1	101	11.4	51	1	1670000	5360000	495000	472000	2350000	1680000	482000	549000	348000	189000	1670000	3.90737e+06	3.41328e+06	3.09247e+06	4.24932e+06	2.94783e+06	689931	638557	387446	227488

## Sheet: isNS1ts_LFQ_proteins
										Raw Abundance										Normalized abundance
Protein FDR Confidence Combined	Accession	Description	Number of Peptides	Number of PSMs	Number of Unique Peptides	Number of AAs	Score Mascot Mascot	Number of Peptides by Search Engine Mascot	Number of Razor Peptides	Abundance_TS_ soluble_protein_R1	Abundance_TS_ soluble_protein_R2	Abundance_TS_ 250kDa_R1	Abundance_TS_ 250kDa_R2	Abundance_TS_ 100kDa_R1	Abundance_TS_ 100kDa_R2	Abundance_TS_ ApoA1_R1	Abundance_TS_ ApoA1_R2	Abundance_TS_ NS1band_R1	Abundance_TS_ NS1band_R2	Abundance_TS_ soluble_protein_R1	Abundance_TS_ soluble_protein_R2	Abundance_TS_ 250kDa_R1	Abundance_TS_ 250kDa_R2	Abundance_TS_ 100kDa_R1	Abundance_TS_ 100kDa_R2	Abundance_TS_ ApoA1_R1	Abundance_TS_ ApoA1_R2	Abundance_TS_ NS1band_R1	Abundance_TS_ NS1band_R2			Abundance_TS_ soluble_protein	Abundance_TS_ soluble_protein_2	Abundance_TS_ 250kDa	Abundance_TS_ 250kDa_2	Abundance_TS_ 100kDa	Abundance_TS_ 100kDa_2	Abundance_TS_ ApoA1	Abundance_TS_ ApoA1_2	Abundance_TS_ NS1band	Abundance_TS_ NS1band_2
High	EU081177_NS1	NS1 Nonstructural protein 1 OS=Dengue Virus type 2 Singapore clinical isolate OX=Dengue Virus 2 DENV2 GN=D2NS1 SV=1	50	1801	50	352	33753	50	0	354806000000	384463000000	323654000000	180040000000	4849164732	1480039449	2122118991	7.31701e+08	617417000000	153858000000	354806000000	3.51427e+11	6.80117e+11	5.96236e+11	3.20721e+10	1.83766e+10	1.7619e+10	9.5011e+09	1.38682e+12	1.38071e+12		NS1ts
High	P15497	Apolipoprotein A-I OS=Bos taurus OX=9913 GN=APOA1 PE=1 SV=3	61	1815	61	265	45738	61	0	482140000000	576658000000	290377000000	216293000000	178967000000	96145177584	167393000000	106472000000	4408579563	7.21697e+08	482140000000	5.27108e+11	6.1019e+11	7.16294e+11	1.18368e+12	1.19377e+12	1.38979e+12	1.38253e+12	9.90243e+09	6.47643e+09		Mean intensity	3.53117e+11		6.38176e+11		2.52243e+10		1.356e+10		1.38377e+12
High	Q7SIH1	Alpha-2-macroglobulin OS=Bos taurus OX=9913 GN=A2M PE=1 SV=2	77	292	76	1510	7618	77	1	10984529224	5630368101	4226346349	2092733230	8.21657e+07	2.32751e+07	4.85435e+07	1.86259e+07	1.78251e+08	7.76459e+06	10984529224	5.14657e+09	8.88112e+09	6.93047e+09	5.43439e+08	2.88991e+08	4.03035e+08	2.41856e+08	4.00383e+08	6.96786e+07		stdev	2.38897e+09		5.93131e+10		9.68416e+09		5.74022e+09		4.32642e+09
High	Q2UVX4	Complement C3 OS=Bos taurus OX=9913 GN=C3 PE=1 SV=2	93	282	93	1661	7525	93	0	7878027134	4375423420	1505448376	5.71105e+08	2.00239e+07	1.38215e+07	4.58579e+06	3.00036e+06	4.13108e+08	1.40487e+08	7878027134	3.99946e+09	3.1635e+09	1.89132e+09	1.32437e+08	1.71612e+08	3.80737e+07	3.89595e+07	9.27911e+08	1.26071e+09
High	A0A140T897	Albumin OS=Bos taurus OX=9913 GN=ALB PE=4 SV=1	56	241	56	607	6748	56	0	39209805204	23373988526	1250143633	6.85322e+08	1.39104e+08	2.48492e+08	5.93646e+07	2.84986e+08	4.9146e+08	4.06406e+08	39209805204	2.13655e+10	2.62701e+09	2.26957e+09	9.20023e+08	3.08535e+09	4.92878e+08	3.70053e+09	1.1039e+09	3.64705e+09		% in TIC	24.744	24.5084	47.4311	41.5812	2.23669	1.28158	1.22874	0.662603	96.7166	96.2899
High	P12763	Alpha-2-HS-glycoprotein OS=Bos taurus OX=9913 GN=AHSG PE=1 SV=2	15	212	15	359	6389	15	0	78033049130	70843403415	4708937050	2167127457	3571971974	1416264159	6.03337e+07	1.85541e+07	1739843101	1.45216e+08	78033049130	6.47561e+10	9.89522e+09	7.17684e+09	2.36248e+10	1.75848e+10	5.00923e+08	2.40924e+08	3.90799e+09	1.30316e+09		Mean %	24.6262		44.5062		1.75914		0.945672		96.5032
High	P02081	Hemoglobin fetal subunit beta OS=Bos taurus OX=9913 PE=1 SV=1	20	160	15	145	4584	20	6	43306828592	23094367621	6916284130	2978884070	6.00383e+08	1.87632e+08	3.28357e+07	9.98445e+06	2.14094e+08	5.62445e+06	43306828592	2.111e+10	1.45337e+10	9.86512e+09	3.9709e+09	2.3297e+09	2.7262e+08	1.29648e+08	4.80891e+08	5.04732e+07		stdev	0.166606		4.13647		0.67537		0.40032		0.301723
High	A0A3Q1LK49	Inter-alpha-trypsin inhibitor heavy chain H2 OS=Bos taurus OX=9913 GN=ITIH2 PE=1 SV=1	41	192	41	864	4524	41	0	21932693194	11154421681	1197571470	4.59839e+08	3.20094e+08	1.371e+08	1.84694e+06	4.47677e+06	2.97792e+08	1168714953	21932693194	1.0196e+10	2.51654e+09	1.52284e+09	2.11708e+09	1.70227e+09	1.53343e+07	5.81305e+07	6.68891e+08	1.04879e+10		ApoA1
High	G5E5A8	Fibronectin OS=Bos taurus OX=9913 GN=FN1 PE=4 SV=1	50	143	50	2510	4416	50	0	7322536528	4833030351	8.2042e+08	2.86674e+08	1.74006e+06	2.98752e+06	7.74269e+06	2.59262e+06	9.63978e+07	1.70171e+08	7322536528	4.41775e+09	1.72401e+09	9.49374e+08	1.15086e+07	3.70939e+07	6.4284e+07	3.36651e+07	2.16526e+08	1.52709e+09		Mean intensity	5.04624e+11		6.63242e+11		1.18872e+12		1.38616e+12		8.18943e+09	6.47643e+09
High	Q58D62	Fetuin-B OS=Bos taurus OX=9913 GN=FETUB PE=1 SV=1	21	164	21	387	4406	21	0	42504063167	29208068087	2264167323	8.26898e+08	8.69393e+08	2.56251e+08	4.23431e+07	1.57467e+07	6.39508e+08	6.62316e+07	42504063167	2.66983e+10	4.75785e+09	2.73843e+09	5.75011e+09	3.18169e+09	3.51556e+08	2.0447e+08	1.43644e+09	5.94356e+08		stdev	3.17971e+10		7.50271e+10		7.13476e+09		5.13026e+09		2.42254e+09
High	A0A3Q1LQ21	Inter-alpha-trypsin inhibitor heavy chain H3 OS=Bos taurus OX=9913 GN=ITIH3 PE=3 SV=1	34	132	34	886	4172	34	0	5149082092	2487257972	7.73898e+08	2.46743e+08	1.63151e+07	1.54514e+06	3.33465e+06	54033.9	1.7624e+08	1.33644e+07	5149082092	2.27354e+09	1.62625e+09	8.17134e+08	1.07907e+08	1.91849e+07	2.76861e+07	701628	3.95865e+08	1.19931e+08
High	Q3SZ57	Alpha-fetoprotein OS=Bos taurus OX=9913 GN=AFP PE=2 SV=1	37	139	37	610	4163	37	0	11456062289	6131586810	8.27371e+08	3.05132e+08	3.44954e+07	2.25273e+07	8.05143e+06	1.35086e+07	1.07689e+08	2.89572e+07	11456062289	5.60472e+09	1.73861e+09	1.0105e+09	2.28151e+08	2.79706e+08	6.68474e+07	1.75408e+08	2.41887e+08	2.59859e+08		% in TIC	33.6242	36.7603	42.5544	49.9541	82.5492	83.2528	96.9233	96.4173	0.690591	0.451664
High	P81644	Apolipoprotein A-II OS=Bos taurus OX=9913 GN=APOA2 PE=1 SV=2	11	191	11	100	4092	11	0	131935000000	274881000000	18864848216	13325845918	19472160217	10908686730	1.18687e+07	3.52821e+06	2.71128e+08	1.05045e+07	131935000000	2.51261e+11	3.9642e+10	4.4131e+10	1.28788e+11	1.35445e+11	9.85406e+07	4.58136e+07	6.09e+08	9.42665e+07		Mean %	35.1923		46.2542		82.901		96.6703		0.571128
High	P01017	Angiotensinogen OS=Bos taurus OX=9913 GN=AGT PE=1 SV=2	25	145	25	476	3977	25	0	12164172275	6637784144	1615903359	9.90375e+08	1.00707e+08	2.38434e+07	7.49816e+06	320584	1.76547e+08	2.63778e+08	12164172275	6.06742e+09	3.39561e+09	3.27981e+09	6.66069e+08	2.96047e+08	6.22538e+07	4.16276e+06	3.96555e+08	2.36712e+09		stdev	2.21752		5.23236		0.497575		0.357783		0.168947
High	F1MJK3	Uncharacterized protein OS=Bos taurus OX=9913 GN=LOC506828 PE=3 SV=3	58	162	6	1462	3806	58	47	2685588826	1322269987	6.94348e+08	2.76206e+08	2.72127e+07	3.06308e+06	609596	2.28271e+06	7.12059e+06	2.87147e+07	2685588826	1.20865e+09	1.45908e+09	9.14708e+08	1.79983e+08	3.80321e+07	5.0612e+06	2.96409e+07	1.59941e+07	2.57682e+08
High	A0A3Q1MLQ7	Talin 1 OS=Bos taurus OX=9913 GN=TLN1 PE=1 SV=1	75	121	66	2550	3602	75	8	1625535810	658087806	5.4842e+07	2.07707e+07	3.78352e+06	837597	2.38042e+06	895500	5.66455e+07	1.93277e+07	1625535810	6.01541e+08	1.15243e+08	6.87859e+07	2.5024e+07	1.03999e+07	1.97635e+07	1.1628e+07	1.27235e+08	1.73445e+08		Total ion intensity	1.43391e+12	1.43391e+12	1.43391e+12	1.43391e+12	1.43391e+12	1.43391e+12	1.43391e+12	1.43391e+12	1.43391e+12	1.43391e+12
High	P34955	Alpha-1-antiproteinase OS=Bos taurus OX=9913 GN=SERPINA1 PE=1 SV=1	24	176	24	416	3470	24	0	28596911189	17908146027	3233184812	1362601342	1787387225	8.54022e+08	1.72757e+07	1.58412e+06	2.71197e+08	2.09912e+07	28596911189	1.63694e+10	6.79412e+09	4.5125e+09	1.18217e+10	1.06038e+10	1.43433e+08	2.05697e+07	6.09155e+08	1.88373e+08		Mean TIC	1.43391e+12		1.43391e+12		1.43391e+12		1.43391e+12		1.43391e+12
High	F1MVK1	C4a anaphylatoxin OS=Bos taurus OX=9913 GN=LOC107131209 PE=4 SV=3	56	130	15	1735	3352	56	35	1642649347	8.49584e+08	1.86821e+08	7.01539e+07	7.39088e+06	456358	1.7818e+06	1.74795e+06	4.42617e+08	4.39705e+07	1642649347	7.76582e+08	3.9258e+08	2.32327e+08	4.88829e+07	5.66627e+06	1.47935e+07	2.26971e+07	9.94193e+08	3.94587e+08		stdev	0.000244141		0.000345267		0.000244141		0.0010358		0.000690534
High	E1BNR0	Apolipoprotein B OS=Bos taurus OX=9913 GN=APOB PE=1 SV=3	85	163	85	4567	3341	85	0	1114088803	4.04028e+08	7.02611e+08	3.22771e+08	2.44308e+07	1.14085e+07	7.78114e+06	673140	4.92012e+07	2.85547e+07	1114088803	3.69311e+08	1.47645e+09	1.06891e+09	1.61584e+08	1.41651e+08	6.46033e+07	8.74069e+06	1.10514e+08	2.56247e+08
High	P81187	Complement factor B OS=Bos taurus OX=9913 GN=CFB PE=1 SV=2	34	114	34	761	3066	34	0	5502155822	2781355033	1272965525	3.46236e+08	7.20821e+06	2.51161e+06	1.34797e+06	1.353e+06	3.11658e+07	1.30732e+07	5502155822	2.54236e+09	2.67497e+09	1.14662e+09	4.76746e+07	3.11849e+07	1.11915e+07	1.75686e+07	7.00038e+07	1.17317e+08		Median Intensity	9.66147e+08	4.21746e+08	2.46454e+08	1.35494e+08	6.85296e+07	5.23096e+07	3.57048e+07	2.13906e+07	1.27112e+08	8.43772e+07
High	Q95121	Pigment epithelium-derived factor OS=Bos taurus OX=9913 GN=SERPINF1 PE=1 SV=1	23	93	23	416	3053	23	0	2926445105	1548339408	4.38799e+08	157169920	1.36414e+06	1.02932e+06	2.46958e+06	1.23194e+06	8.44131e+08	8.01174e+07	2926445105	1.4153e+09	9.22079e+08	5.20497e+08	9.02232e+06	1.27804e+07	2.05038e+07	1.59966e+07	1.89606e+09	7.18965e+08		mean median	6.93946e+08		1.90974e+08		6.04196e+07		2.85477e+07		1.05745e+08
High	F1MYX2	Apolipoprotein M OS=Bos taurus OX=9913 GN=APOM PE=3 SV=1	9	115	9	188	2747	9	0	21827694269	13886053291	2329682252	1015618567	3.68724e+08	1.26666e+08	1.04938e+07	3.09798e+06	1.74558e+08	1.22985e+07	21827694269	1.26929e+10	4.89553e+09	3.36341e+09	2.43872e+09	1.57272e+09	8.71254e+07	4.0227e+07	3.92086e+08	1.10366e+08		stdev	3.8495e+08		7.84603e+07		1.14693e+07		1.01217e+07		3.02184e+07
High	P60712	Actin, cytoplasmic 1 OS=Bos taurus OX=9913 GN=ACTB PE=1 SV=1	21	116	1	375	2714	21	28	6464869234	3562736032	355978343	1.14832e+08	6.08819e+07	1.05021e+07	1.42401e+07	1.74948e+06	1873567031	1.92212e+08	6464869234	3.2566e+09	7.48042e+08	3.80287e+08	4.02669e+08	1.30397e+08	1.18229e+08	2.27168e+07	4.20835e+09	1.72489e+09
High	P01966	Hemoglobin subunit alpha OS=Bos taurus OX=9913 GN=HBA PE=1 SV=2	12	131	12	142	2703	12	0	35390631945	16049725201	3503728145	1447114988	4.79451e+08	1.55501e+08	1.83485e+07	8.3784e+06	2.62371e+08	1.27092e+07	35390631945	1.46706e+10	7.36263e+09	4.79239e+09	3.17106e+09	1.93074e+09	1.52339e+08	1.08793e+08	5.8933e+08	1.14051e+08
High	A5D984	Pyruvate kinase OS=Bos taurus OX=9913 GN=PKM PE=1 SV=1	32	86	32	531	2645	32	0	4401636060	2262809001	1.88578e+08	4.30839e+07	1.67868e+07	1.53256e+06	4.01515e+06	388853	2.6983e+07	2.03376e+06	4401636060	2.06837e+09	3.96273e+08	1.4268e+08	1.11027e+08	1.90287e+07	3.3336e+07	5.04924e+06	6.06084e+07	1.82508e+07
High	A0A3Q1LW12	Glycosyl-phosphatidylinositol-specific phospholipase D OS=Bos taurus OX=9913 GN=GPLD1 PE=3 SV=1	27	113	5	843	2592	27	26	1311367635	5.73442e+08	3.49876e+08	1.18912e+08	4.65281e+08	2.00427e+08	4.6736e+06	913926	7.88909e+06	953767	1311367635	5.24168e+08	7.35219e+08	3.938e+08	3.07734e+09	2.48856e+09	3.88028e+07	1.18673e+07	1.77202e+07	8.55901e+06
High	P08169	Cation-independent mannose-6-phosphate receptor OS=Bos taurus OX=9913 GN=IGF2R PE=1 SV=2	62	108	62	2499	2521	62	0	1623652175	6.18044e+08	1.86785e+08	7.33319e+07	1.0927e+07	1.93509e+06	4.69372e+06	5.54518e+06	6.34373e+07	8.40471e+06	1623652175	5.64938e+08	3.92504e+08	2.42852e+08	7.22703e+07	2.40267e+07	3.89698e+07	7.20039e+07	1.42491e+08	7.54231e+07
High	E1BFV0	Karyopherin subunit beta 1 OS=Bos taurus OX=9913 GN=KPNB1 PE=1 SV=2	32	85	32	876	2477	32	0	2767335249	1296672541	3.60349e+08	1.20668e+08	3.90821e+07	1.13506e+06	1.06359e+07	4.59906e+07	3.47668e+07	3.85917e+06	2767335249	1.18525e+09	7.57227e+08	3.99614e+08	2.58487e+08	1.40932e+07	8.83049e+07	5.97185e+08	7.80921e+07	3.46318e+07
High	Q76LV1	Heat shock protein HSP 90-beta OS=Bos taurus OX=9913 GN=HSP90AB1 PE=2 SV=3	40	95	25	724	2430	40	15	4579828976	2584285743	1.33557e+08	3.27701e+07	5.92199e+06	1.8399e+06	1.70943e+06	503499	2.58917e+07	3.93883e+06	4579828976	2.36223e+09	2.80653e+08	1.08524e+08	3.91677e+07	2.28448e+07	1.41926e+07	6.53791e+06	5.81572e+07	3.53467e+07
High	F1MWN1	Chromosome segregation 1-like protein OS=Bos taurus OX=9913 GN=CSE1L PE=3 SV=1	38	82	38	971	2122	38	0	1898069593	1421162778	2.30505e+08	6.18254e+07	9.44751e+06	1.80891e+06	3.30804e+06	1.1587e+06	2.46111e+07	5.32811e+06	1898069593	1.29905e+09	4.84376e+08	2.04746e+08	6.24852e+07	2.246e+07	2.74651e+07	1.50457e+07	5.52807e+07	4.78139e+07
High	P17697	Clusterin OS=Bos taurus OX=9913 GN=CLU PE=1 SV=1	16	74	16	439	2067	16	0	2551356543	1328832420	5.7462e+08	185733319	77528961	5.22775e+07	163876	441311	1.19284e+08	4.70043e+08	2551356543	1.21465e+09	1.20749e+09	6.1509e+08	5.12772e+08	6.49093e+08	1.36059e+06	5.7304e+06	2.67931e+08	4.21812e+09
High	A6QNZ7	Keratin 10 (Epidermolytic hyperkeratosis; keratosis palmaris et plantaris) OS=Bos taurus OX=9913 GN=KRT10 PE=2 SV=1	12	83	8	526	1996	12	1	4.16238e+08	159685736	1.47313e+08	2.98475e+07	3.08655e+08	9.17028e+07	2.57098e+08	5.66944e+07	9.6342e+08	2.84289e+08	4.16238e+08	1.45965e+08	3.0956e+08	9.88453e+07	2.04143e+09	1.13861e+09	2.13457e+09	7.36174e+08	2.16401e+09	2.55118e+09
High	P53712	Integrin beta-1 OS=Bos taurus OX=9913 GN=ITGB1 PE=1 SV=3	25	65	25	798	1920	25	0	1196696024	684052631	2.99876e+08	1.20689e+08	3.46284e+06	4.21298e+06	3.0095e+06	2.07107e+06	6.3911e+07	1.77838e+06	1196696024	6.25274e+08	6.30151e+08	3.99685e+08	2.2903e+07	5.23096e+07	2.49865e+07	2.68928e+07	1.43555e+08	1.5959e+07
High	D1Z308	Periostin OS=Bos taurus OX=9913 GN=POSTN PE=1 SV=2	31	76	3	836	1908	31	27	1699764020	9.23149e+08	1.12718e+08	4.38963e+07	3.81721e+06	4.63899e+06	1.65161e+06	896461	1.40855e+07	1.22211e+07	1699764020	8.43826e+08	2.36862e+08	1.45371e+08	2.52468e+07	5.7599e+07	1.37126e+07	1.16405e+07	3.16385e+07	1.09671e+08
High	P00735	Prothrombin OS=Bos taurus OX=9913 GN=F2 PE=1 SV=2	26	67	26	625	1840	26	0	1557397563	7.26249e+08	1.42441e+08	4.71867e+07	3.88768e+06	1.25178e+06	1.01232e+06	1.11618e+06	9.37774e+06	9850190	1557397563	6.63845e+08	2.99321e+08	1.56267e+08	2.57129e+07	1.55425e+07	8.40483e+06	1.44935e+07	2.1064e+07	8.83946e+07
High	P19120	Heat shock cognate 71 kDa protein OS=Bos taurus OX=9913 GN=HSPA8 PE=1 SV=2	27	62	23	650	1742	27	4	1569579756	823849012	6.99063e+07	7.38798e+06	2.27415e+07	6.6475e+06	1.49839e+07	5.13193e+06	2.25502e+07	3.45396e+06	1569579756	7.53059e+08	1.46899e+08	2.44667e+07	1.50411e+08	8.25374e+07	1.24405e+08	6.66379e+07	5.06515e+07	3.09955e+07
High	F1MBA3	Integrin alpha-2 OS=Bos taurus OX=9913 GN=ITGA2 PE=3 SV=2	30	63	1	1179	1707	30	25	1241547008	5.77325e+08	3.69292e+08	1.61727e+08	138312	82176.8	535736	32773.6	6.37886e+06	4.99985e+06	1241547008	5.27718e+08	7.7602e+08	5.35589e+08	914786	1.02033e+06	4.44797e+06	425563	1.4328e+07	4.48682e+07
High	F1N1I6	Actin-depolymerizing factor OS=Bos taurus OX=9913 GN=GSN PE=1 SV=2	28	68	28	846	1592	28	0	1330257378	880315482	1.39429e+08	3.78919e+07	2.81333e+06	1.2572e+06	24163.7	206518	3.3209e+07	4.17777e+06	1330257378	8.04673e+08	2.92991e+08	1.25486e+08	1.86072e+07	1.56097e+07	200620	2.68162e+06	7.45932e+07	3.74909e+07
High	A0A3Q1MJT2	Alpha-1B-glycoprotein OS=Bos taurus OX=9913 GN=A1BG PE=1 SV=1	20	56	20	586	1586	20	0	2291612670	1080485372	2.37922e+08	1.50091e+08	1.57503e+07	5.77055e+06	318195	102739	5.22384e+06	2.73852e+06	2291612670	9.87643e+08	4.99963e+08	4.97053e+08	1.04171e+08	7.16489e+07	2.64183e+06	1.33406e+06	1.17336e+07	2.45752e+07
High	E1B726	Plasminogen OS=Bos taurus OX=9913 GN=PLG PE=3 SV=2	42	76	3	812	1569	42	34	1525366708	9.11395e+08	1.27869e+08	4.81433e+07	1.0561e+06	750786	1.90899e+06	1.24784e+06	3.1441e+06	3.02085e+06	1525366708	8.33082e+08	2.687e+08	1.59435e+08	6.985e+06	9.32199e+06	1.58495e+07	1.62032e+07	7.0622e+06	2.71088e+07
High	Q3SYU2	Elongation factor 2 OS=Bos taurus OX=9913 GN=EEF2 PE=2 SV=3	33	59	33	858	1565	33	0	1270848973	957427482	7.78856e+07	1.92298e+07	1.84191e+07	3.16896e+06	7.37429e+06	3.26261e+07	1.88222e+07	1.83231e+07	1270848973	8.75159e+08	1.63666e+08	6.3683e+07	1.21823e+08	3.93468e+07	6.12254e+07	4.23647e+08	4.22779e+07	1.64429e+08
High	A0A3Q1M0U9	15S Mg(2+)-ATPase p97 subunit OS=Bos taurus OX=9913 GN=VCP PE=3 SV=1	26	51	26	796	1497	26	0	1042055963	316253567	2.74734e+07	4.2537e+06	1.03762e+07	5.45881e+06	3.72902e+06	1.83804e+06	1.70981e+07	3.56284e+06	1042055963	2.89079e+08	5.77318e+07	1.40869e+07	6.86276e+07	6.77782e+07	3.09603e+07	2.38668e+07	3.84052e+07	3.19726e+07
High	A7MBJ5	Cullin-associated NEDD8-dissociated protein 1 OS=Bos taurus OX=9913 GN=CAND1 PE=2 SV=1	35	61	35	1230	1439	35	0	2175946865	3839521294	4.07785e+08	269238641	3.08842e+08	290946151	1.49074e+08	1.96277e+08	4.52806e+08	8.39857e+06	2175946865	3.50961e+09	8.56908e+08	8.91633e+08	2.04266e+09	3.61247e+09	1.23769e+09	2.54865e+09	1.01708e+09	7.53679e+07
High	F1MC11	Keratin, type I cytoskeletal 14 OS=Bos taurus OX=9913 GN=KRT14 PE=1 SV=3	15	62	9	515	1417	15	6	555131940	2.21192e+08	1.61106e+08	1.44471e+07	2.79836e+08	4.00729e+07	1.97839e+08	4.95507e+07	8.78633e+08	4.40427e+07	555131940	2.02185e+08	3.38543e+08	4.78443e+07	1.85082e+09	4.97557e+08	1.64257e+09	6.43413e+08	1.97356e+09	3.95235e+08
High	A0A3Q1MG73	Fibulin-1 OS=Bos taurus OX=9913 GN=FBLN1 PE=1 SV=1	19	40	19	674	1350	19	0	9.96944e+08	546357677	2.85458e+07	1.43408e+07	8.54729e+06	1.51202e+06	5.76113e+06	1.71056e+06	3.48679e+06	4.80556e+06	9.96944e+08	4.99411e+08	5.99853e+07	4.74923e+07	5.65312e+07	1.87737e+07	4.78321e+07	2.22115e+07	7.83192e+06	4.31246e+07
High	A0A3Q1LPF0	Apolipoprotein E OS=Bos taurus OX=9913 GN=APOE PE=3 SV=1	15	45	15	316	1339	15	0	3251989600	10805527638	3.48374e+08	7.87613e+08	1.46956e+08	4.13842e+08	1.00332e+08	4.6257e+08	7.53843e+06	3.0231e+06	3251989600	9.87705e+09	7.32063e+08	2.60833e+09	9.71956e+08	5.13838e+09	8.33011e+08	6.00644e+09	1.69326e+07	2.7129e+07
High	G3N0V2	Cytokeratin-1 OS=Bos taurus OX=9913 GN=KRT1 PE=1 SV=2	9	50	6	606	1255	9	2	513369658	3.12549e+08	2.48347e+08	93333997	3.63163e+08	1.29206e+08	220121717	7.29664e+07	1297404312	1.80855e+08	513369658	2.85693e+08	5.21868e+08	3.09093e+08	2.40194e+09	1.60426e+09	1.82757e+09	9.47465e+08	2.91419e+09	1.62298e+09
High	A0A3Q1LKN2	Thyroglobulin OS=Bos taurus OX=9913 GN=TG PE=3 SV=1	37	55	37	2518	1230	37	0	8.1012e+08	2.03927e+08	4.99703e+07	8.83854e+06	1.83889e+07	1.71327e+06	1.27318e+06	1.07221e+06	4.08082e+07	563179	8.1012e+08	1.86404e+08	1.05006e+08	2.92705e+07	1.21623e+08	2.12725e+07	1.05707e+07	1.39226e+07	9.16622e+07	5.05391e+06
High	Q0VCM5	Inter-alpha-trypsin inhibitor heavy chain H1 OS=Bos taurus OX=9913 GN=ITIH1 PE=1 SV=1	20	45	20	906	1220	20	0	8.5256e+08	3.38462e+08	1.01103e+08	2.70386e+07	495271	3.37414e+08	598852	545334	2.15659e+07	539234	8.5256e+08	3.09379e+08	2.12454e+08	8.95433e+07	3.27569e+06	4.18943e+09	4.972e+06	7.08113e+06	4.84408e+07	4.83904e+06
High	F6RMV5	Leucine rich alpha-2-glycoprotein 1 OS=Bos taurus OX=9913 GN=LRG1 PE=1 SV=1	13	45	13	353	1220	13	0	1973061022	804049526	2.42732e+08	8.09784e+07	1.29438e+07	777816	3.11875e+07	4.41921e+06	515782172	5.17988e+07	1973061022	7.3496e+08	5.1007e+08	2.68175e+08	8.56098e+07	9.6576e+06	2.58936e+08	5.73832e+07	1.15854e+09	4.64837e+08
High	P68103	Elongation factor 1-alpha 1 OS=Bos taurus OX=9913 GN=EEF1A1 PE=1 SV=1	14	49	7	462	1200	14	7	1612992186	746591301	5.97052e+07	1.83703e+07	1.28219e+06	106698	3.63473e+06	1.40695e+06	2.42734e+08	1.27652e+07	1612992186	6.82439e+08	1.25463e+08	6.08366e+07	8.48031e+06	1.3248e+06	3.01775e+07	1.82692e+07	5.45221e+08	1.14553e+08
High	F1N3Q7	Apolipoprotein A-IV OS=Bos taurus OX=9913 GN=APOA4 PE=3 SV=2	19	49	19	465	1194	19	0	9.252e+08	5.16014e+08	129711733	3.04699e+07	8.00445e+06	3.68029e+06	3.96417e+06	2.0683e+06	5.87441e+07	4320870	9.252e+08	4.71675e+08	2.72572e+08	1.00907e+08	5.2941e+07	4.56956e+07	3.29127e+07	2.68567e+07	1.31949e+08	3.87751e+07
High	A0A3Q1LI40	Complement component C7 OS=Bos taurus OX=9913 GN=C7 PE=3 SV=1	29	47	1	843	1190	29	24	542019180	177280171	5.74906e+07	1.73395e+07	2.03117e+06	4.65829e+06	530869	2.13714e+06	1.26225e+07	1.47432e+07	542019180	1.62047e+08	1.20809e+08	5.74229e+07	1.34341e+07	5.78388e+07	4.40757e+06	2.77506e+07	2.83523e+07	1.32304e+08
High	Q3ZBS7	Vitronectin OS=Bos taurus OX=9913 GN=VTN PE=1 SV=1	13	40	13	476	1182	13	0	710481409	401584284	3.27012e+08	152686257	9.26283e+06	3.15304e+06	160501	251522	1.83224e+07	6.9721e+06	710481409	3.67078e+08	6.87173e+08	5.05649e+08	6.12638e+07	3.9149e+07	1.33257e+06	3.26599e+06	4.11552e+07	6.25669e+07
High	F1N3A1	Thrombospondin-1 OS=Bos taurus OX=9913 GN=THBS1 PE=3 SV=1	21	43	21	1170	1165	21	0	6.04432e+08	221361577	51124317	1.11085e+07	735777	485642	1.29369e+06	495843	1.22127e+07	423966	6.04432e+08	2.02341e+08	1.07431e+08	3.67878e+07	4.86639e+06	6.02987e+06	1.07409e+07	6.4385e+06	2.74317e+07	3.80463e+06
High	M0QVZ6	Keratin, type II cytoskeletal 5 OS=Bos taurus OX=9913 GN=KRT5 PE=3 SV=2	12	39	6	594	1143	12	6	1.46248e+08	48011984	1.25409e+08	6.18681e+07	1.79268e+08	4.90805e+07	1.4506e+08	2.07544e+07	6.23111e+08	85076496	1.46248e+08	4.38865e+07	2.6353e+08	2.04887e+08	1.18567e+09	6.09398e+08	1.20437e+09	2.69495e+08	1.39961e+09	7.63468e+08
High	Q3T0K2	T-complex protein 1 subunit gamma OS=Bos taurus OX=9913 GN=CCT3 PE=1 SV=1	20	35	20	545	1139	20	0	7.63906e+08	329869418	1.82359e+07	2688127	3.91072e+06	716871	5.74632e+06	9.11386e+06	9.40328e+07	3.06441e+07	7.63906e+08	3.01525e+08	3.83205e+07	8.90223e+06	2.58652e+07	8.90088e+06	4.77091e+07	1.18343e+08	2.11214e+08	2.74997e+08		Acetyl [N-Term]
High	P10096	Glyceraldehyde-3-phosphate dehydrogenase OS=Bos taurus OX=9913 GN=GAPDH PE=1 SV=4	13	41	13	333	1050	13	0	2711633854	1645382880	2.32891e+08	4.0914e+07	1.17003e+08	614960	5.38561e+07	592299	1.91107e+08	1.53076e+07	2711633854	1.504e+09	4.8939e+08	1.35494e+08	7.7385e+08	7.63553e+06	4.47143e+08	7.69097e+06	4.29258e+08	1.37369e+08
High	P28800	Alpha-2-antiplasmin OS=Bos taurus OX=9913 GN=SERPINF2 PE=1 SV=2	15	36	15	492	1046	15	0	2117112629	1070336006	1.61194e+08	8.67352e+07	2.25484e+07	1.0409e+07	3.00829e+06	668856	3.63119e+06	23940954	2117112629	9.78366e+08	3.38728e+08	2.8724e+08	1.49134e+08	1.29242e+08	2.49765e+07	8.68505e+06	8.15628e+06	2.14844e+08
High	Q3ZBA6	DnaJ homolog subfamily B member 11 OS=Bos taurus OX=9913 GN=DNAJB11 PE=2 SV=1	14	33	14	358	1020	14	0	4.01216e+08	286650546	1.23943e+07	9.48289e+06	864604	5.03502e+06	1.38856e+06	9.62693e+06	1.13581e+08	5186559	4.01216e+08	2.6202e+08	2.6045e+07	3.14043e+07	5.71844e+06	6.25163e+07	1.15286e+07	1.25005e+08	2.55123e+08	4.65437e+07
High	F1MMK9	Alpha-1-microglobulin OS=Bos taurus OX=9913 GN=KIF12 PE=3 SV=3	14	32	14	482	1016	14	0	616028286	417171034	5.79175e+07	2.47291e+07	3.27743e+06	473330	711664	160992	1.33814e+08	1.70547e+07	616028286	3.81325e+08	1.21706e+08	8.18951e+07	2.16767e+07	5.87701e+06	5.90863e+06	2.09047e+06	3.0057e+08	1.53047e+08
High	A0A3Q1NJR8	Antithrombin-III OS=Bos taurus OX=9913 GN=SERPINC1 PE=3 SV=1	20	39	20	530	958	20	0	1168337471	6.06431e+08	6.08532e+07	1.75402e+07	2.06101e+07	6.06444e+06	879128	381559	1.61517e+07	103608505	1168337471	5.54323e+08	1.27875e+08	5.80876e+07	1.36314e+08	7.52979e+07	7.299e+06	4.95452e+06	3.62794e+07	9.29772e+08
High	E1BE98	Exportin 1 OS=Bos taurus OX=9913 GN=XPO1 PE=3 SV=2	21	33	21	1071	907	21	0	3.61206e+08	125193059	3.8103e+07	3.591e+06	1.57811e+06	128912	1.42965e+06	935974	1.94705e+06	4706345	3.61206e+08	1.14436e+08	8.00685e+07	1.18923e+07	1.04375e+07	1.60061e+06	1.18698e+07	1.21536e+07	4.37341e+06	4.22343e+07
High	Q27975	Heat shock 70 kDa protein 1A OS=Bos taurus OX=9913 GN=HSPA1A PE=1 SV=2	19	31	12	641	900	19	4	2.00498e+08	132236103	2.84218e+07	2.50609e+07	750574	2.56716e+06	426270	1.79478e+06	5.84818e+07	1.30354e+07	2.00498e+08	1.20874e+08	5.97246e+07	8.29937e+07	4.96425e+06	3.18746e+07	3.53912e+06	2.33052e+07	1.3136e+08	1.16978e+08
High	Q05443	Lumican OS=Bos taurus OX=9913 GN=LUM PE=1 SV=1	14	33	14	342	808	14	0	1411731008	6.26481e+08	1.70638e+08	3.20547e+08	3.92094e+08	1.90499e+08	1.00695e+07	2.95155e+06	4.70609e+06	5.97363e+06	1411731008	5.7265e+08	3.58573e+08	1.06155e+09	2.59329e+09	2.36529e+09	8.36022e+07	3.83257e+07	1.05707e+07	5.36067e+07
High	A0A3Q1MBE4	Exportin 5 OS=Bos taurus OX=9913 GN=XPO5 PE=4 SV=1	2	37	2	1158	807	2	0	3745015909	35302997723	2179143090	2533314052	1610200515	1402180270	1253238307	1674265837	3.0767e+07	14839788	3745015909	3.22695e+10	4.57919e+09	8.38954e+09	1.06498e+10	1.74099e+10	1.04051e+10	2.17402e+10	6.9108e+07	1.33171e+08
High	Q3MHN2	Complement component C9 OS=Bos taurus OX=9913 GN=C9 PE=2 SV=1	13	26	13	548	764	13	0	514156434	266866405	2.16918e+08	109369940	1.15768e+08	2.59376e+07	1.06051e+08	6.42686e+07	56143831	3.04436e+07	514156434	2.43936e+08	4.55825e+08	3.62199e+08	7.65681e+08	3.22049e+08	8.8049e+08	8.34525e+08	1.26109e+08	2.73197e+08
High	Q3ZCI9	T-complex protein 1 subunit theta OS=Bos taurus OX=9913 GN=CCT8 PE=1 SV=3	16	25	16	548	758	16	0	680512964	3.09362e+08	1.21847e+08	5.36768e+07	1.02304e+07	3.23945e+06	1.14645e+07	3.75527e+06	1.06071e+08	1.9848e+08	680512964	2.8278e+08	2.56045e+08	1.77761e+08	6.76632e+07	4.0222e+07	9.51843e+07	4.87619e+07	2.38255e+08	1.78114e+09
High	Q3T0P6	Phosphoglycerate kinase 1 OS=Bos taurus OX=9913 GN=PGK1 PE=2 SV=3	15	34	15	417	737	15	0	326503657	116525613	1.95609e+07	7.87515e+06	3.70486e+06	232118	2.40926e+06	290772	1.26331e+08	5.45687e+06	326503657	1.06513e+08	4.11047e+07	2.608e+07	2.45037e+07	2.88204e+06	2.0003e+07	3.77566e+06	2.83761e+08	4.89694e+07
High	F1MG05	Elongation factor 1-gamma OS=Bos taurus OX=9913 GN=EEF1G PE=4 SV=1	11	33	11	440	727	11	0	5.3231e+08	195335798	2.07499e+07	3.5006e+06	555457	109154	44909.9	262854	1.32435e+08	8.95484e+06	5.3231e+08	1.78551e+08	4.36032e+07	1.15929e+07	3.67376e+06	1.35528e+06	372867	3.41314e+06	2.97472e+08	8.03598e+07		Acetyl [N-Term]
High	F1N0I3	Coagulation factor V OS=Bos taurus OX=9913 GN=F5 PE=3 SV=3	24	30	24	2121	704	24	0	1.94296e+08	7.25271e+07	1.90197e+07	2.88996e+06	125677	178178	302042	161310	1.66202e+07	3185243	1.94296e+08	6.62951e+07	3.99674e+07	9.57064e+06	831220	2.21231e+06	2.50772e+06	2.0946e+06	3.73319e+07	2.85841e+07
High	A0A452DHZ3	Plasma serine protease inhibitor OS=Bos taurus OX=9913 GN=SERPINA5 PE=3 SV=1	14	25	14	389	692	14	0	373320894	189786589	3.09278e+07	7.32311e+06	2.12132e+06	384472	1.32316e+06	852232	7.97395e+06	2.73359e+06	373320894	1.73479e+08	6.49907e+07	2.42518e+07	1.40303e+07	4.77372e+06	1.09856e+07	1.10662e+07	1.79109e+07	2.4531e+07
High	G5E531	CCT-alpha OS=Bos taurus OX=9913 GN=TCP1 PE=3 SV=1	17	26	17	556	691	17	0	4.3433e+08	244005588	1.40653e+07	1.9205e+06	1.01752e+07	5.7328e+06	5.33931e+06	715244	1.15934e+07	565576	4.3433e+08	2.23039e+08	2.95564e+07	6.36009e+06	6.72983e+07	7.11801e+07	4.43299e+07	9.28741e+06	2.60407e+07	5.07542e+06
High	F1MJQ3	Alpha-amylase OS=Bos taurus OX=9913 GN=AMY2B PE=3 SV=1	14	29	14	511	690	14	0	2.33972e+08	102081923	3.20156e+07	4.55401e+06	1.33396e+06	959188	2.91793e+06	268307	3.17986e+06	2.96191e+06	2.33972e+08	9.33104e+07	6.72767e+07	1.50815e+07	8.82274e+06	1.19096e+07	2.42263e+07	3.48395e+06	7.14252e+06	2.65799e+07
High	G5E513	Uncharacterized protein OS=Bos taurus OX=9913 PE=1 SV=2	12	22	5	439	676	12	8	242331291	132278157	9.88239e+07	5.90814e+07	2.08027e+07	1992104	1.50036e+06	250801	6.78753e+06	1.83886e+07	242331291	1.20912e+08	2.07666e+08	1.95659e+08	1.37588e+08	2.47346e+07	1.24568e+07	3.25663e+06	1.5246e+07	1.65017e+08
High	Q3MHP2	Ras-related protein Rab-11B OS=Bos taurus OX=9913 GN=RAB11B PE=2 SV=3	11	26	11	218	651	11	0	6.26634e+08	361260655	7.41022e+07	2.30955e+07	4.15531e+06	415543	3.70596e+07	1.3684e+07	1743380	149694768	6.26634e+08	3.30219e+08	1.55716e+08	7.64849e+07	2.7483e+07	5.1595e+06	3.07689e+08	1.77686e+08	3.91593e+06	1.34335e+09		Acetyl [N-Term]
High	A5PKC2	SHBG protein OS=Bos taurus OX=9913 GN=SHBG PE=2 SV=1	7	18	7	401	598	7	0	188765923	118670944	1.32122e+07	3.07976e+06	1.84409e+06	2.1246e+06	2.84381e+06	105668	1.83989e+07	2.57381e+06	188765923	1.08474e+08	2.77638e+07	1.01992e+07	1.21967e+07	2.63797e+07	2.36109e+07	1.37209e+06	4.1327e+07	2.30972e+07
High	Q5E9I6	ADP-ribosylation factor 3 OS=Bos taurus OX=9913 GN=ARF3 PE=2 SV=3	10	23	5	181	567	10	6	550740015	292554454	7.64217e+07	25431559	1.95879e+06	509905	1.4195e+06	501940	29868300	1.11318e+08	550740015	2.67416e+08	1.6059e+08	8.42213e+07	1.29553e+07	6.33114e+06	1.17855e+07	6.51766e+06	6.70893e+07	9.9896e+08
High	F1MDN4	60S acidic ribosomal protein P0 OS=Bos taurus OX=9913 GN=RPLP0 PE=3 SV=2	10	19	10	318	544	10	0	935350490	505611474	5.11499e+07	4.58657e+07	1.24991e+07	1.21369e+07	662977	571502	5.6536e+07	5697950	935350490	4.62166e+08	1.07485e+08	1.51893e+08	8.26686e+07	1.50696e+08	5.50439e+06	7.42093e+06	1.26989e+08	5.11328e+07
High	Q3T169	40S ribosomal protein S3 OS=Bos taurus OX=9913 GN=RPS3 PE=2 SV=1	16	27	16	243	540	16	0	363731791	1.98609e+08	2.87295e+07	3.2761e+06	336133	595996	385458	303257	4.07575e+07	6.04976e+06	363731791	1.81543e+08	6.03714e+07	1.08494e+07	2.22316e+06	7.40006e+06	3.20028e+06	3.93778e+06	9.15484e+07	5.429e+07
High	Q3SZV7	Hemopexin OS=Bos taurus OX=9913 GN=HPX PE=2 SV=1	13	21	13	459	504	13	0	2.01711e+08	102592834	7.29149e+07	568765	5.52756e+07	3.60519e+07	2.34791e+06	1.23389e+06	5.68433e+06	5.01425e+06	2.01711e+08	9.37774e+07	1.53221e+08	1.88357e+06	3.65589e+08	4.47631e+08	1.94936e+07	1.6022e+07	1.2768e+07	4.49974e+07
High	P48616	Vimentin OS=Bos taurus OX=9913 GN=VIM PE=1 SV=3	15	21	14	466	492	15	1	311531940	1.0154e+08	1.34748e+07	1.4468e+06	1.49548e+06	257201	3.08841e+06	909504	1.41207e+07	2.244e+06	311531940	9.2815e+07	2.83156e+07	4.79136e+06	9.891e+06	3.19348e+06	2.56417e+07	1.18099e+07	3.17175e+07	2.01374e+07
High	A0A3Q1MQG2	Plectin OS=Bos taurus OX=9913 GN=PLEC PE=1 SV=1	19	24	19	4535	490	19	0	1.34581e+08	2.96376e+07	4.01147e+06	2.74038e+07	4.05114e+06	2.28816e+06	651649	6.23728e+06	4.94341e+06	152363	1.34581e+08	2.7091e+07	8.42959e+06	9.07527e+07	2.6794e+07	2.84104e+07	5.41035e+06	8.09907e+07	1.11037e+07	1.36729e+06
High	A5PJ69	SERPINA10 protein OS=Bos taurus OX=9913 GN=SERPINA10 PE=2 SV=1	11	19	11	452	486	11	0	4.85836e+08	187271648	4.11908e+07	6.67859e+06	3.22307e+06	1.08462e+06	78813	425812	6.48936e+06	297711	4.85836e+08	1.7118e+08	8.65572e+07	2.21174e+07	2.13172e+07	1.3467e+07	654348	5.52915e+06	1.45762e+07	2.67162e+06
High	F1MER7	Heparan sulfate proteoglycan 2 OS=Bos taurus OX=9913 GN=HSPG2 PE=1 SV=2	16	20	16	4356	485	16	0	8.14565e+07	40490200	2.40633e+06	1.78828e+06	119991	189013	344585	82297.6	2.5803e+06	21126984	8.14565e+07	3.7011e+07	5.0566e+06	5.92223e+06	793613	2.34684e+06	2.86093e+06	1.06863e+06	5.7958e+06	1.89591e+08
High	E1BI98	Collagen type VI alpha 1 chain OS=Bos taurus OX=9913 GN=COL6A1 PE=1 SV=1	14	21	14	1027	462	14	0	5.34038e+08	2.77171e+08	6.55237e+07	13435016	2.09224e+07	5.9362e+06	1.59795e+06	1.53877e+06	4.0382e+06	5.06055e+06	5.34038e+08	2.53355e+08	1.3769e+08	4.44925e+07	1.38379e+08	7.37057e+07	1.3267e+07	1.99809e+07	9.0705e+06	4.54129e+07
High	P02662	Alpha-S1-casein OS=Bos taurus OX=9913 GN=CSN1S1 PE=1 SV=2	5	23	5	214	461	5	0	1.10858e+07	2.9899e+06	1.71084e+07	1.49392e+07	4.48533e+06	2.68895e+06	3.54809e+07	1.52217e+07	1.83557e+08	1.99579e+07	1.10858e+07	2.73299e+06	3.59511e+07	4.94739e+07	2.96657e+07	3.33868e+07	2.94582e+08	1.97653e+08	4.123e+08	1.791e+08
High	P02754	Beta-lactoglobulin OS=Bos taurus OX=9913 GN=LGB PE=1 SV=3	7	13	7	178	404	7	0	1.15096e+08	204024668	6.11081e+06	1.52733e+06	2.79226e+07	10009070	3.28772e+07	1.24437e+07	171692719	18910882	1.15096e+08	1.86494e+08	1.28411e+07	5.05802e+06	1.84679e+08	1.24276e+08	2.72964e+08	1.61581e+08	3.85651e+08	1.69704e+08
High	F1MS32	Apolipoprotein D OS=Bos taurus OX=9913 GN=APOD PE=3 SV=3	3	15	3	212	386	3	0	224170260	94712654	64417164	1.9053e+07	5.64227e+07	1.61363e+07	6.66722e+06	1952078	1.19866e+08	1.27442e+07	224170260	8.65743e+07	1.35364e+08	6.30974e+07	3.73176e+08	2.00354e+08	5.53549e+07	2.53476e+07	2.69239e+08	1.14365e+08
High	F1MCX1	Glypican 4 OS=Bos taurus OX=9913 GN=GPC4 PE=1 SV=2	5	13	5	556	368	5	0	7.13732e+08	1.92342e+08	3.55352e+07	9.93219e+06	7840930	2.16037e+06	4.13759e+06	848210	1.42781e+07	1.9493e+06	7.13732e+08	1.75815e+08	7.46727e+07	3.28923e+07	5.18594e+07	2.68238e+07	3.43525e+07	1.1014e+07	3.2071e+07	1.74928e+07
High	P00741	Coagulation factor IX OS=Bos taurus OX=9913 GN=F9 PE=1 SV=2	7	13	7	462	345	7	0	136757061	5.83456e+07	1.87079e+07	6.45456e+06	522924	440349	503043	1.52698e+06	5.63757e+06	2416028	136757061	5.33322e+07	3.93122e+07	2.13755e+07	3.45859e+06	5.4675e+06	4.17654e+06	1.98277e+07	1.2663e+07	2.16812e+07
High	P20959	Insulin-like growth factor-binding protein 3 OS=Bos taurus OX=9913 GN=IGFBP3 PE=1 SV=3	4	12	4	291	341	4	0	5.89912e+08	315806838	3.44565e+06	107376	2.70463e+06	237605	21145.2	2046613	1.89908e+07	18193526	5.89912e+08	2.88671e+08	7.24058e+06	355594	1.78883e+07	2.95018e+06	175559	2.65752e+07	4.26567e+07	1.63267e+08
High	Q2KJ93	Cell division control protein 42 homolog OS=Bos taurus OX=9913 GN=CDC42 PE=1 SV=1	9	13	8	191	304	9	1	182949873	8.50753e+07	1.16007e+07	7.74698e+06	1.03466e+07	1.63125e+06	6216315	4.16409e+06	3.73106e+07	6.51192e+06	182949873	7.77651e+07	2.43774e+07	2.56556e+07	6.84317e+07	2.02541e+07	5.16112e+07	5.40705e+07	8.38061e+07	5.84373e+07
High	Q3ZBA8	Protein NDRG2 OS=Bos taurus OX=9913 GN=NDRG2 PE=2 SV=1	6	11	6	357	284	6	0	8.63471e+07	28758015	1.95165e+07	8814317	57154.8	8.08549e+06	9499083	3.01781e+06	3.5791e+06	1.4593e+07	8.63471e+07	2.62869e+07	4.10113e+07	2.91902e+07	378018	1.00392e+08	7.88666e+07	3.9186e+07	8.03927e+06	1.30956e+08
High	Q5E9F7	Cofilin-1 OS=Bos taurus OX=9913 GN=CFL1 PE=2 SV=3	7	12	7	166	277	7	0	2.07362e+08	1.67508e+08	2.30106e+07	8303598	2.66003e+07	9.72625e+06	9.46751e+06	6.60009e+06	5.97405e+07	127941448	2.07362e+08	1.53115e+08	4.83538e+07	2.74989e+07	1.75933e+08	1.20764e+08	7.86044e+07	8.57017e+07	1.34187e+08	1.14813e+09		Acetyl [N-Term]
High	Q08DG9	Anthrax toxin receptor OS=Bos taurus OX=9913 GN=ANTXR2 PE=2 SV=1	7	10	6	488	236	7	1	110014880	4.51495e+07	1.31739e+07	3.31934e+06	299093	328336	202327	78625.4	2.80003e+06	1.55944e+06	110014880	4.127e+07	2.76833e+07	1.09926e+07	1.97818e+06	4.07672e+06	1.67983e+06	1.02095e+06	6.28934e+06	1.39943e+07
High	Q56JV9	40S ribosomal protein S3a OS=Bos taurus OX=9913 GN=RPS3A PE=2 SV=3	6	10	6	264	199	6	0	235584275	1.18052e+08	3.47172e+07	1.17416e+07	1.21961e+06	347262	866713	29187.2	811206	6194684	235584275	1.07908e+08	7.29537e+07	3.88845e+07	8.06643e+06	4.31171e+06	7.19593e+06	378995	1.82211e+06	5.55905e+07
High	Q32PA1	CD59 glycoprotein OS=Bos taurus OX=9913 GN=CD59 PE=2 SV=1	3	9	3	121	193	3	0	3010999224	2719935232	175558920	88162999	1.44582e+07	3.82753e+06	7.09766e+06	3287569	41200289	5.44595e+06	3010999224	2.48622e+09	3.68914e+08	2.91968e+08	9.5626e+07	4.75237e+07	5.89286e+07	4.26889e+07	9.25429e+07	4.88714e+07
High	Q2KIG3	Carboxypeptidase B2 OS=Bos taurus OX=9913 GN=CPB2 PE=1 SV=1	10	11	10	423	177	10	0	5.63833e+07	1.60357e+07	1.2419e+07	5.05062e+06	746930	137464	467586	190583	675847	331119	5.63833e+07	1.46578e+07	2.60969e+07	1.67261e+07	4.94015e+06	1.7068e+06	3.88215e+06	2.47471e+06	1.51807e+06	2.97143e+06
High	Q5GN72	Alpha-1-acid glycoprotein OS=Bos taurus OX=9913 GN=agp PE=2 SV=2	5	9	5	202	176	5	0	51110084	1.12747e+08	1.59653e+07	8.9943e+06	2.2032e+07	7.08937e+06	7.8371e+06	3.00285e+06	92092633	4.75868e+06	51110084	1.03059e+08	3.35489e+07	2.97863e+07	1.45718e+08	8.80237e+07	6.50679e+07	3.89918e+07	2.06856e+08	4.27039e+07
High	F1MSD2	RuvB-like helicase OS=Bos taurus OX=9913 GN=RUVBL2 PE=3 SV=2	5	7	5	488	113	5	0	4.7944e+07	1.50266e+07	3.60306e+07	1.60483e+07	1.19797e+07	5.52272e+06	1.51823e+06	964763	2.14025e+07	7.06722e+06	4.7944e+07	1.37354e+07	7.57137e+07	5.31469e+07	7.92329e+07	6.85718e+07	1.26052e+07	1.25274e+07	4.80737e+07	6.34206e+07
High	F6RFP6	Basigin OS=Bos taurus OX=9913 GN=BSG PE=1 SV=1	3	5	3	320	101	3	0	82039616	41740122	8.22843e+06	4.16733e+06	123686	431572	9.01765e+06	434720	4.75561e+06	779443	82039616	3.81535e+07	1.7291e+07	1.38009e+07	818051	5.35853e+06	7.48695e+07	5.64482e+06	1.06819e+07	6.99464e+06
High	A0A3Q1MEY4	Ceramidase OS=Bos taurus OX=9913 GN=ASAH1 PE=3 SV=1	2	4	2	361	92	2	0	33216331	8864638	1.41219e+06	1.12962e+06	531295	111286	60943.6	119721	10974318	646956	33216331	8.10293e+06	2.96754e+06	3.74094e+06	3.51395e+06	1.38176e+06	505987	1.55457e+06	2.46502e+07	5.80572e+06
High	A0A3Q1LPV3	Prolyl endopeptidase FAP OS=Bos taurus OX=9913 GN=FAP PE=4 SV=1	4	6	4	745	91	4	0	24592237	3.427e+07	2.96287e+06	3.99082e+06	284352	1.62746e+06	331299	287084	1576407	1.34556e+06	24592237	3.13253e+07	6.22608e+06	1.32164e+07	1.88069e+06	2.0207e+07	2.75062e+06	3.72776e+06	3.54088e+06	1.20749e+07
