# Supplementary material for: Secreted dengue virus NS1 from infection is predominantly dimeric and in complex with high-density lipoprotein
Source: eLife. 2024 May 24;12:RP90762. doi: 10.7554/eLife.90762 (PMC11126310; doi:10.7554/eLife.90762)
Supplement: Supplementary file 2. [file elife-90762-supp2.xlsx]

## Sheet: AllCrosslinks_wt
ProteinA	ProteinB	PosA	PosB	Crosslink	ResA	ResB	Replicate	File Name	Scan Number	Precursor Scan Number	Precursor MZ	Precursor Charge	Precursor Mass	Cross Type	Link Residues	Peptide Info -->	Protein Accession	Protein Link Site	Base Sequence	Full Sequence	Peptide Monoisotopic Mass	Score	Matched Ion Series	Matched Ion Mass-To-Charge Ratios	Matched Ion Mass Diff (Da)	Matched Ion Mass Diff (Ppm)	Matched Ion Intensities	Matched Ion Counts	Beta Peptide Info -->	Beta Peptide Protein Accession	Beta Peptide Protein LinkSite	Beta Peptide Base Sequence	Beta Peptide Full Sequence	Beta Peptide Theoretical Mass	Beta Peptide Score	Beta Peptide Matched Ions	Beta Peptide Matched Ion Mass-To-Charge Ratios	Beta Peptide Matched Ion Mass Diff (Da)	Beta Peptide Matched Ion Mass Diff (Ppm)	Beta Peptide Matched Ion Intensities	Beta Peptide Matched Ion Counts	Summary Info -->	XL Total Score	Mass Diff (Da)	AlphaIndexingRank	Parent Ions	ParentIonsNum	AlphaParentIonMaxIntensityRank	BetaParentIonMaxIntensityRank
ApoA1	ApoA1	100	228	ApoA1ApoA1100228	K	K	2	W:\Collaboration_Services\Raw_files_FPL\Fusion Lumos\2021\Zheng\20211204_ZS_WP_SV_ns1_xlms\2021-12-04-10-10-24\Task1-Calibrate\20211203_ZS_WP_SV_ns1_R2-calib.mzML	30916	30893	858.039	5	4285.16	Intra	K;K		ApoA1	100	EQLGPVTQEFWDNLEKETASLR	EQLGPVTQEFWDNLEKETASLR(16)	2589.27	10.0506	[y2+1, y3+1, y4+1, y5+1, y6+1, y8+1];[b6+1, b9+1, b10+1];[M22+2]	[y2+1:288.20253, y3+1:375.23556, y4+1:446.27311, y5+1:547.32169, y6+1:676.36498, y8+1:987.50766];[b6+1:624.33530, b9+1:982.47818, b10+1:1129.55714];[M22+2:1338.63606]	[y2+1:-0.00049, y3+1:0.00051, y4+1:0.00095, y5+1:0.00186, y6+1:0.00255, y8+1:-0.00288];[b6+1:0.00015, b9+1:-0.00583, b10+1:0.00472];[M22+2:0.00382]	[y2+1:-1.71, y3+1:1.36, y4+1:2.13, y5+1:3.40, y6+1:3.78, y8+1:-2.92];[b6+1:0.23, b9+1:-5.94, b10+1:4.18];[M22+2:1.43]	[y2+1:8335, y3+1:7049, y4+1:3580, y5+1:10242, y6+1:8908, y8+1:5441];[b6+1:9503, b9+1:10805, b10+1:7423];[M22+2:12376]	10		ApoA1	228	ALGEKAKPVLEDLR	ALGEKAKPVLEDLR(5)	1537.88	4.06205	{30916@[y7+1, y12+2];[M14+3, M14+2]}{30921@[b5+1]}{30922@[b6+1]}{30923@}{30924@[b7+1]}	{30916@[y7+1:841.47277, y12+2:704.89468];[M14+3:531.63853, M14+2:812.94028]}{30921@[b5+1:585.26756]}{30922@[b6+1:624.33429]}{30923@}{30924@[b7+1:784.40129]}	{30916@[y7+1:-0.00502, y12+2:0.00263];[M14+3:0.00040, M14+2:0.00058]}{30921@[b5+1:-0.00255]}{30922@[b6+1:-0.00085]}{30923@}{30924@[b7+1:-0.00090]}	{30916@[y7+1:-5.97, y12+2:1.87];[M14+3:0.25, M14+2:0.36]}{30921@[b5+1:-4.37]}{30922@[b6+1:-1.37]}{30923@}{30924@[b7+1:-1.15]}	{30916@[y7+1:9512, y12+2:8192];[M14+3:5774, M14+2:79124]}{30921@[b5+1:78]}{30922@[b6+1:34]}{30923@}{30924@[b7+1:36]}	{30916@4}{30921@1}{30922@1}{30923@0}{30924@1}		14.1127	158.006	3	1;2	3	10	1
ApoA1	ApoA1	100	228	ApoA1ApoA1100228	K	K	2	W:\Collaboration_Services\Raw_files_FPL\Fusion Lumos\2021\Zheng\20211204_ZS_WP_SV_ns1_xlms\2021-12-04-10-10-24\Task1-Calibrate\20211203_ZS_WP_SV_ns1_R2-calib.mzML	30941	30912	858.038	5	4285.15	Intra	K;K		ApoA1	100	EQLGPVTQEFWDNLEKETASLR	EQLGPVTQEFWDNLEKETASLR(16)	2589.27	9.03915	[y2+1, y3+1, y5+1, y6+1, y8+1];[b6+1, b9+1];[M22+2, M22+2]	[y2+1:288.20361, y3+1:375.23311, y5+1:547.32038, y6+1:676.36392, y8+1:987.50449];[b6+1:624.33405, b9+1:982.48220];[M22+2:1322.65125, M22+2:1338.63252]	[y2+1:0.00059, y3+1:-0.00194, y5+1:0.00055, y6+1:0.00149, y8+1:-0.00606];[b6+1:-0.00110, b9+1:-0.00180];[M22+2:0.00628, M22+2:-0.00325]	[y2+1:2.07, y3+1:-5.18, y5+1:1.00, y6+1:2.21, y8+1:-6.14];[b6+1:-1.76, b9+1:-1.83];[M22+2:2.38, M22+2:-1.22]	[y2+1:3550, y3+1:4522, y5+1:9846, y6+1:5631, y8+1:3385];[b6+1:5276, b9+1:4520];[M22+2:8076, M22+2:9142]	9		ApoA1	228	ALGEKAKPVLEDLR	ALGEKAKPVLEDLR(5)	1537.88	5.06497	{30941@[y7+1, y12+2];[M14+3, M14+2];[b7+1]}{30946@[b12+1]}{30947@}{30948@}	{30941@[y7+1:841.47345, y12+2:704.89518];[M14+3:531.63888, M14+2:812.93888];[b7+1:784.40248]}{30946@[b12+1:1337.66894]}{30947@}{30948@}	{30941@[y7+1:-0.00434, y12+2:0.00362];[M14+3:0.00147, M14+2:-0.00222];[b7+1:0.00029]}{30946@[b12+1:-0.00803]}{30947@}{30948@}	{30941@[y7+1:-5.16, y12+2:2.57];[M14+3:0.93, M14+2:-1.37];[b7+1:0.37]}{30946@[b12+1:-6.01]}{30947@}{30948@}	{30941@[y7+1:7941, y12+2:9275];[M14+3:6917, M14+2:58294];[b7+1:7098]}{30946@[b12+1:32]}{30947@}{30948@}	{30941@5}{30946@1}{30947@0}{30948@0}		14.1041	158.001	3	2;2	4	21	10
ApoA1	ApoA1	119	141	ApoA1ApoA1119141	K	K	1	W:\Collaboration_Services\Raw_files_FPL\Fusion Lumos\2021\Zheng\20211204_ZS_WP_SV_ns1_xlms\2021-12-04-10-10-24\Task1-Calibrate\20211203_ZS_WP_SV_ns1_R1-calib.mzML	20140	20093	985.166	3	2952.47	Intra	K;K		ApoA1	141	QKVAPLGEEFR	QKVAPLGEEFR(2)	1272.68	7.08801	{20140@[b3+1];[y5+1, y7+1, y8+1, y9+1];[M11+1, M11+2]}{20145@[y8+1]}{20146@[y9+1]}	{20140@[b3+1:410.23854];[y5+1:637.29617, y7+1:847.42888, y8+1:918.47068, y9+1:1017.53722];[M11+1:1327.69784, M11+2:680.33898]}{20145@[y8+1:918.46734]}{20146@[y9+1:1017.53254]}	{20140@[b3+1:-0.00125];[y5+1:0.00215, y7+1:-0.00196, y8+1:0.00272, y9+1:0.00085];[M11+1:-0.00263, M11+2:-0.00186]}{20145@[y8+1:-0.00062]}{20146@[y9+1:-0.00383]}	{20140@[b3+1:-3.05];[y5+1:3.38, y7+1:-2.32, y8+1:2.97, y9+1:0.83];[M11+1:-1.98, M11+2:-1.37]}{20145@[y8+1:-0.67]}{20146@[y9+1:-3.77]}	{20140@[b3+1:3484];[y5+1:4067, y7+1:18859, y8+1:7269, y9+1:3935];[M11+1:15709, M11+2:21490]}{20145@[y8+1:59]}{20146@[y9+1:43]}	{20140@7}{20145@1}{20146@1}		ApoA1	119	QKVQPYLDEFQK	QKVQPYLDEFQK(2)	1521.78	6.06827	{20140@[y5+1, y6+1, y8+1, y9+1];[M12+1, M12+2]}{20143@}{20144@}	{20140@[y5+1:666.31047, y6+1:779.38874, y8+1:1039.51156, y9+1:1167.56028];[M12+1:1576.79694, M12+2:804.88975]}{20143@}{20144@}	{20140@[y5+1:0.00114, y6+1:-0.00466, y8+1:0.00208, y9+1:-0.00779];[M12+1:-0.00364, M12+2:-0.00043]}{20143@}{20144@}	{20140@[y5+1:1.71, y6+1:-5.99, y8+1:2.00, y9+1:-6.68];[M12+1:-2.31, M12+2:-0.27]}{20143@}{20144@}	{20140@[y5+1:5130, y6+1:3161, y8+1:15673, y9+1:3537];[M12+1:12628, M12+2:17904]}{20143@}{20144@}	{20140@6}{20143@0}{20144@0}		13.1563	158.01	47	2;2	4	2	12
ApoA1	ApoA1	119	141	ApoA1ApoA1119141	K	K	2	W:\Collaboration_Services\Raw_files_FPL\Fusion Lumos\2021\Zheng\20211204_ZS_WP_SV_ns1_xlms\2021-12-04-10-10-24\Task1-Calibrate\20211203_ZS_WP_SV_ns1_R2-calib.mzML	19965	19937	739.126	4	2952.47	Intra	K;K		ApoA1	119	QKVQPYLDEFQK	QKVQPYLDEFQK(2)	1521.78	16.1615	{19965@[b2+1, b2+1, b3+1, b3+1, b4+1, b4+1];[y3+1, y4+1, y5+1, y6+1, y7+1, y8+1, y9+1, y10+1];[M12+2, M12+2]}{19969@}{19970@}	{19965@[b2+1:311.17152, b2+1:343.14310, b3+1:410.24065, b3+1:442.21235, b4+1:538.29784, b4+1:570.26963];[y3+1:422.23830, y4+1:551.28410, y5+1:666.30928, y6+1:779.39312, y7+1:942.45588, y8+1:1039.50887, y9+1:1167.56596, y10+1:1266.63802];[M12+2:788.90342, M12+2:804.88915]}{19969@}{19970@}	{19965@[b2+1:0.00015, b2+1:-0.00035, b3+1:0.00086, b3+1:0.00048, b4+1:-0.00053, b4+1:-0.00081];[y3+1:-0.00150, y4+1:0.00172, y5+1:-0.00005, y6+1:-0.00028, y7+1:-0.00084, y8+1:-0.00062, y9+1:-0.00211, y10+1:0.00154];[M12+2:-0.00102, M12+2:-0.00164]}{19969@}{19970@}	{19965@[b2+1:0.47, b2+1:-1.03, b3+1:2.10, b3+1:1.09, b4+1:-0.98, b4+1:-1.43];[y3+1:-3.55, y4+1:3.12, y5+1:-0.07, y6+1:-0.36, y7+1:-0.89, y8+1:-0.59, y9+1:-1.81, y10+1:1.22];[M12+2:-0.65, M12+2:-1.02]}{19969@}{19970@}	{19965@[b2+1:7123, b2+1:6490, b3+1:11360, b3+1:24769, b4+1:13940, b4+1:25402];[y3+1:5172, y4+1:15356, y5+1:28727, y6+1:39649, y7+1:10436, y8+1:360152, y9+1:37452, y10+1:20533];[M12+2:126352, M12+2:278742]}{19969@}{19970@}	{19965@16}{19969@0}{19970@0}		ApoA1	141	QKVAPLGEEFR	QKVAPLGEEFR(2)	1272.68	10.1499	{19965@[y3+1, y4+1, y5+1, y7+1, y8+1, y9+1];[b4+1, b4+1];[M11+2, M11+2]}{19967@[y9+1]}{19968@[y9+1]}	{19965@[y3+1:451.23014, y4+1:580.27207, y5+1:637.29403, y7+1:847.43007, y8+1:918.46704, y9+1:1017.53539];[b4+1:481.27884, b4+1:513.24945];[M11+2:664.35393, M11+2:680.33943]}{19967@[y9+1:1017.53169]}{19968@[y9+1:1017.53160]}	{19965@[y3+1:0.00018, y4+1:-0.00048, y5+1:0.00002, y7+1:-0.00077, y8+1:-0.00091, y9+1:-0.00098];[b4+1:0.00194, b4+1:0.00046];[M11+2:0.00011, M11+2:-0.00097]}{19967@[y9+1:-0.00468]}{19968@[y9+1:-0.00477]}	{19965@[y3+1:0.41, y4+1:-0.83, y5+1:0.02, y7+1:-0.91, y8+1:-1.00, y9+1:-0.96];[b4+1:4.03, b4+1:0.90];[M11+2:0.08, M11+2:-0.71]}{19967@[y9+1:-4.60]}{19968@[y9+1:-4.70]}	{19965@[y3+1:7326, y4+1:8934, y5+1:46520, y7+1:243091, y8+1:68015, y9+1:40478];[b4+1:8480, b4+1:9364];[M11+2:396858, M11+2:110224]}{19967@[y9+1:454]}{19968@[y9+1:49]}	{19965@10}{19967@1}{19968@1}		26.3114	158.008	23	2;2	4	6	1
ApoA1	ApoA1	119	141	ApoA1ApoA1119141	K	K	2	W:\Collaboration_Services\Raw_files_FPL\Fusion Lumos\2021\Zheng\20211204_ZS_WP_SV_ns1_xlms\2021-12-04-10-10-24\Task1-Calibrate\20211203_ZS_WP_SV_ns1_R2-calib.mzML	19988	19937	985.165	3	2952.47	Intra	K;K		ApoA1	141	QKVAPLGEEFR	QKVAPLGEEFR(2)	1272.68	5.08512	{19988@[y7+1, y8+1, y9+1];[M11+2, M11+2]}{19993@[b1+1];[y8+1, y9+1]}{19994@[b1+1];[y8+1, y9+1]}	{19988@[y7+1:847.42593, y8+1:918.46273, y9+1:1017.53626];[M11+2:664.35272, M11+2:680.33831]}{19993@[b1+1:129.06665];[y8+1:918.46656, y9+1:1017.53322]}{19994@[b1+1:129.06665];[y8+1:918.46648, y9+1:1017.53168]}	{19988@[y7+1:-0.00492, y8+1:-0.00523, y9+1:-0.00011];[M11+2:-0.00232, M11+2:-0.00321]}{19993@[b1+1:0.00079];[y8+1:-0.00140, y9+1:-0.00315]}{19994@[b1+1:0.00079];[y8+1:-0.00148, y9+1:-0.00469]}	{19988@[y7+1:-5.81, y8+1:-5.70, y9+1:-0.11];[M11+2:-1.75, M11+2:-2.36]}{19993@[b1+1:6.19];[y8+1:-1.52, y9+1:-3.10]}{19994@[b1+1:6.18];[y8+1:-1.62, y9+1:-4.61]}	{19988@[y7+1:14595, y8+1:4870, y9+1:4128];[M11+2:18849, M11+2:11286]}{19993@[b1+1:7];[y8+1:3, y9+1:12]}{19994@[b1+1:2];[y8+1:4, y9+1:6]}	{19988@5}{19993@3}{19994@3}		ApoA1	119	QKVQPYLDEFQK	QKVQPYLDEFQK(2)	1521.78	4.0982	{19988@[y5+1, y8+1];[M12+2, M12+2]}{19991@}{19992@[b4+1]}	{19988@[y5+1:666.30610, y8+1:1039.50308];[M12+2:788.90316, M12+2:804.88686]}{19991@}{19992@[b4+1:570.26660]}	{19988@[y5+1:-0.00324, y8+1:-0.00641];[M12+2:-0.00154, M12+2:-0.00621]}{19991@}{19992@[b4+1:-0.00385]}	{19988@[y5+1:-4.86, y8+1:-6.17];[M12+2:-0.97, M12+2:-3.86]}{19991@}{19992@[b4+1:-6.77]}	{19988@[y5+1:3770, y8+1:13258];[M12+2:25329, M12+2:19625]}{19991@}{19992@[b4+1:8]}	{19988@4}{19991@0}{19992@1}		9.18332	158.008	29	2;2	4	4	14
ApoA1	ApoA1	119	223	ApoA1ApoA1119223	K	K	1	W:\Collaboration_Services\Raw_files_FPL\Fusion Lumos\2021\Zheng\20211204_ZS_WP_SV_ns1_xlms\2021-12-04-10-10-24\Task1-Calibrate\20211203_ZS_WP_SV_ns1_R1-calib.mzML	17452	17422	714.115	4	2852.43	Intra	K;K		ApoA1	223	ASEQLKALGEK	ASEQLKALGEK(6)	1172.64	8.18292	{17452@[y3+1, y4+1, y5+1, y7+1];[b5+1, b8+1];[M11+2, M11+2]}{17454@[y6+1]}{17455@}	{17452@[y3+1:333.17664, y4+1:446.26074, y5+1:517.29777, y7+1:812.48313];[b5+1:529.26366, b8+1:895.48816];[M11+2:614.33254, M11+2:630.31833]}{17454@[y6+1:699.40020]}{17455@}	{17452@[y3+1:-0.00022, y4+1:-0.00018, y5+1:-0.00027, y7+1:-0.00449];[b5+1:0.00200, b8+1:-0.00020];[M11+2:-0.00014, M11+2:-0.00063]}{17454@[y6+1:-0.00336]}{17455@}	{17452@[y3+1:-0.66, y4+1:-0.41, y5+1:-0.52, y7+1:-5.53];[b5+1:3.79, b8+1:-0.22];[M11+2:-0.12, M11+2:-0.50]}{17454@[y6+1:-4.82]}{17455@}	{17452@[y3+1:30558, y4+1:21283, y5+1:48931, y7+1:11822];[b5+1:12948, b8+1:22057];[M11+2:406525, M11+2:51640]}{17454@[y6+1:392]}{17455@}	{17452@8}{17454@1}{17455@0}		ApoA1	119	QKVQPYLDEFQK	QKVQPYLDEFQK(2)	1521.78	7.18291	{17452@[y5+1, y6+1, y7+1, y8+1, y9+1];[M12+2, M12+2]}{17456@}{17457@}	{17452@[y5+1:666.31312, y6+1:779.39167, y7+1:942.46180, y8+1:1039.50936, y9+1:1167.56640];[M12+2:788.90432, M12+2:804.89011]}{17456@}{17457@}	{17452@[y5+1:0.00379, y6+1:-0.00173, y7+1:0.00507, y8+1:-0.00012, y9+1:-0.00167];[M12+2:0.00079, M12+2:0.00029]}{17456@}{17457@}	{17452@[y5+1:5.70, y6+1:-2.22, y7+1:5.39, y8+1:-0.12, y9+1:-1.43];[M12+2:0.50, M12+2:0.18]}{17456@}{17457@}	{17452@[y5+1:22789, y6+1:27005, y7+1:10325, y8+1:127279, y9+1:18540];[M12+2:83375, M12+2:316440]}{17456@}{17457@}	{17452@7}{17456@0}{17457@0}		15.3658	158.008	32	2;2	4	6	2
ApoA1	ApoA1	119	223	ApoA1ApoA1119223	K	K	2	W:\Collaboration_Services\Raw_files_FPL\Fusion Lumos\2021\Zheng\20211204_ZS_WP_SV_ns1_xlms\2021-12-04-10-10-24\Task1-Calibrate\20211203_ZS_WP_SV_ns1_R2-calib.mzML	17501	17454	714.114	4	2852.43	Intra	K;K		ApoA1	223	ASEQLKALGEK	ASEQLKALGEK(6)	1172.64	11.162	{17501@[y3+1, y4+1, y5+1, y6+1, y7+1];[b5+1, b8+1, b8+1, b10+1];[M11+2, M11+2]}{17505@[y6+1]}{17506@}	{17501@[y3+1:333.17716, y4+1:446.26135, y5+1:517.29879, y6+1:699.40454, y7+1:812.48697];[b5+1:529.26031, b8+1:895.48688, b8+1:927.45587, b10+1:1081.54935];[M11+2:614.33327, M11+2:630.31895]}{17505@[y6+1:699.40134]}{17506@}	{17501@[y3+1:0.00030, y4+1:0.00042, y5+1:0.00075, y6+1:0.00098, y7+1:-0.00066];[b5+1:-0.00134, b8+1:-0.00148, b8+1:-0.00457, b10+1:-0.00306];[M11+2:0.00132, M11+2:0.00061]}{17505@[y6+1:-0.00223]}{17506@}	{17501@[y3+1:0.89, y4+1:0.95, y5+1:1.46, y6+1:1.41, y7+1:-0.81];[b5+1:-2.54, b8+1:-1.65, b8+1:-4.93, b10+1:-2.83];[M11+2:1.07, M11+2:0.49]}{17505@[y6+1:-3.19]}{17506@}	{17501@[y3+1:18584, y4+1:8392, y5+1:18805, y6+1:11524, y7+1:3793];[b5+1:7493, b8+1:9098, b8+1:4696, b10+1:7028];[M11+2:160483, M11+2:17436]}{17505@[y6+1:117]}{17506@}	{17501@11}{17505@1}{17506@0}		ApoA1	119	QKVQPYLDEFQK	QKVQPYLDEFQK(2)	1521.78	10.1376	{17501@[y4+1, y5+1, y6+1, y8+2, y9+1];[M12+2, M12+2];[b3+1, b4+1, b7+1]}{17507@}{17508@}	{17501@[y4+1:551.28574, y5+1:666.31212, y6+1:779.39438, y8+2:520.25887, y9+1:1167.56794];[M12+2:788.90552, M12+2:804.89083];[b3+1:442.21456, b4+1:570.26905, b7+1:943.46499]}{17507@}{17508@}	{17501@[y4+1:0.00335, y5+1:0.00279, y6+1:0.00099, y8+2:0.00097, y9+1:-0.00012];[M12+2:0.00319, M12+2:0.00172];[b3+1:0.00269, b4+1:-0.00139, b7+1:-0.00561]}{17507@}{17508@}	{17501@[y4+1:6.09, y5+1:4.20, y6+1:1.27, y8+2:0.93, y9+1:-0.11];[M12+2:2.02, M12+2:1.07];[b3+1:6.09, b4+1:-2.45, b7+1:-5.96]}{17507@}{17508@}	{17501@[y4+1:4672, y5+1:11502, y6+1:19235, y8+2:15726, y9+1:5699];[M12+2:29652, M12+2:125077];[b3+1:3528, b4+1:8346, b7+1:3618]}{17507@}{17508@}	{17501@10}{17507@0}{17508@0}		21.2995	158.006	52	2;2	4	2	1
ApoA1	ApoA1	130	141	ApoA1ApoA1130141	K	K	1	W:\Collaboration_Services\Raw_files_FPL\Fusion Lumos\2021\Zheng\20211204_ZS_WP_SV_ns1_xlms\2021-12-04-10-10-24\Task1-Calibrate\20211203_ZS_WP_SV_ns1_R1-calib.mzML	16953	16929	705.601	4	2818.37	Intra	K;K		ApoA1	141	QKVAPLGEEFR	QKVAPLGEEFR(2)	1272.68	8.17896	{16953@[b4+1, b4+1];[y5+1, y7+1, y8+1, y9+1];[M11+2, M11+2]}{16961@}{16962@[y9+1]}	{16953@[b4+1:481.27703, b4+1:513.24738];[y5+1:637.29358, y7+1:847.43040, y8+1:918.46770, y9+1:1017.53640];[M11+2:664.35416, M11+2:680.33976]}{16961@}{16962@[y9+1:1017.53226]}	{16953@[b4+1:0.00012, b4+1:-0.00161];[y5+1:-0.00043, y7+1:-0.00044, y8+1:-0.00026, y9+1:0.00003];[M11+2:0.00057, M11+2:-0.00030]}{16961@}{16962@[y9+1:-0.00411]}	{16953@[b4+1:0.26, b4+1:-3.14];[y5+1:-0.68, y7+1:-0.53, y8+1:-0.28, y9+1:0.03];[M11+2:0.43, M11+2:-0.22]}{16961@}{16962@[y9+1:-4.04]}	{16953@[b4+1:60753, b4+1:50090];[y5+1:189318, y7+1:1194038, y8+1:383999, y9+1:242615];[M11+2:2606093, M11+2:576663]}{16961@}{16962@[y9+1:229]}	{16953@8}{16961@0}{16962@1}		ApoA1	130	KWHEEVEIYR	KWHEEVEIYR(1)	1387.69	5.23055	{16953@[y6+1, y7+1, y8+2];[M10+2, M10+2]}{16959@[y3+1]}{16960@}	{16953@[y6+1:808.41899, y7+1:937.46305, y8+2:537.76443];[M10+2:721.85730, M10+2:737.84311]}{16959@[y3+1:451.26683]}{16960@}	{16953@[y6+1:-0.00095, y7+1:0.00051, y8+2:0.00014];[M10+2:0.00104, M10+2:0.00057]}{16959@[y3+1:0.00048]}{16960@}	{16953@[y6+1:-1.18, y7+1:0.54, y8+2:0.13];[M10+2:0.72, M10+2:0.39]}{16959@[y3+1:1.07]}{16960@}	{16953@[y6+1:66178, y7+1:61086, y8+2:169862];[M10+2:1760660, M10+2:4774810]}{16959@[y3+1:727]}{16960@}	{16953@5}{16959@1}{16960@0}		13.4095	158.002	21	2;2	4	2	1
ApoA1	ApoA1	130	141	ApoA1ApoA1130141	K	K	2	W:\Collaboration_Services\Raw_files_FPL\Fusion Lumos\2021\Zheng\20211204_ZS_WP_SV_ns1_xlms\2021-12-04-10-10-24\Task1-Calibrate\20211203_ZS_WP_SV_ns1_R2-calib.mzML	17036	17010	705.601	4	2818.37	Intra	K;K		ApoA1	141	QKVAPLGEEFR	QKVAPLGEEFR(2)	1272.68	8.17364	{17036@[b3+1, b4+1];[y5+1, y7+1, y8+1, y9+1];[M11+2, M11+2]}{17040@[y8+1, y9+1]}{17041@[y9+1]}	{17036@[b3+1:410.24032, b4+1:481.27897];[y5+1:637.29445, y7+1:847.43104, y8+1:918.46772, y9+1:1017.53617];[M11+2:664.35478, M11+2:680.34008]}{17040@[y8+1:918.46664, y9+1:1017.53346]}{17041@[y9+1:1017.53480]}	{17036@[b3+1:0.00053, b4+1:0.00207];[y5+1:0.00043, y7+1:0.00020, y8+1:-0.00023, y9+1:-0.00020];[M11+2:0.00182, M11+2:0.00033]}{17040@[y8+1:-0.00132, y9+1:-0.00291]}{17041@[y9+1:-0.00157]}	{17036@[b3+1:1.30, b4+1:4.31];[y5+1:0.68, y7+1:0.24, y8+1:-0.25, y9+1:-0.20];[M11+2:1.37, M11+2:0.25]}{17040@[y8+1:-1.43, y9+1:-2.86]}{17041@[y9+1:-1.54]}	{17036@[b3+1:25028, b4+1:23848];[y5+1:121869, y7+1:506884, y8+1:199459, y9+1:136157];[M11+2:1017625, M11+2:206234]}{17040@[y8+1:1512, y9+1:1262]}{17041@[y9+1:629]}	{17036@8}{17040@2}{17041@1}		ApoA1	130	KWHEEVEIYR	KWHEEVEIYR(1)	1387.69	6.24642	{17036@[y3+1, y6+1, y7+1, y8+2];[M10+2, M10+2]}{17038@[y3+1, y7+1, y9+1]}{17039@[y7+1, y9+1]}	{17036@[y3+1:451.26785, y6+1:808.42112, y7+1:937.46123, y8+2:537.76505];[M10+2:721.85762, M10+2:737.84336]}{17038@[y3+1:451.26732, y7+1:937.46658, y9+1:1260.60181]}{17039@[y7+1:937.46668, y9+1:1260.60194]}	{17036@[y3+1:0.00151, y6+1:0.00118, y7+1:-0.00131, y8+2:0.00137];[M10+2:0.00168, M10+2:0.00109]}{17038@[y3+1:0.00097, y7+1:0.00405, y9+1:0.00105]}{17039@[y7+1:0.00414, y9+1:0.00118]}	{17036@[y3+1:3.34, y6+1:1.46, y7+1:-1.40, y8+2:1.28];[M10+2:1.17, M10+2:0.74]}{17038@[y3+1:2.16, y7+1:4.32, y9+1:0.83]}{17039@[y7+1:4.42, y9+1:0.94]}	{17036@[y3+1:22250, y6+1:23184, y7+1:54609, y8+2:65389];[M10+2:843110, M10+2:2166351]}{17038@[y3+1:429, y7+1:2888, y9+1:729]}{17039@[y7+1:653, y9+1:210]}	{17036@6}{17038@3}{17039@2}		14.4201	158.002	36	2;2	4	2	1
ApoA1	ApoA1	130	141	ApoA1ApoA1130141	K	K	3	W:\Collaboration_Services\Raw_files_FPL\Fusion Lumos\2021\Zheng\20211204_ZS_WP_SV_ns1_xlms\2021-12-04-10-10-24\Task1-Calibrate\20211203_ZS_WP_SV_ns1_R3-calib.mzML	16271	16237	705.6	4	2818.37	Intra	K;K		ApoA1	141	QKVAPLGEEFR	QKVAPLGEEFR(2)	1272.68	6.15162	{16271@[y5+1, y7+1, y8+1, y9+1];[M11+2, M11+2]}{16276@[y9+1]}{16277@[y9+1]}	{16271@[y5+1:637.29334, y7+1:847.43042, y8+1:918.46620, y9+1:1017.53254];[M11+2:664.35372, M11+2:680.33971]}{16276@[y9+1:1017.53492]}{16277@[y9+1:1017.53483]}	{16271@[y5+1:-0.00068, y7+1:-0.00042, y8+1:-0.00176, y9+1:-0.00383];[M11+2:-0.00032, M11+2:-0.00040]}{16276@[y9+1:-0.00145]}{16277@[y9+1:-0.00155]}	{16271@[y5+1:-1.06, y7+1:-0.50, y8+1:-1.92, y9+1:-3.77];[M11+2:-0.24, M11+2:-0.30]}{16276@[y9+1:-1.42]}{16277@[y9+1:-1.52]}	{16271@[y5+1:109265, y7+1:417716, y8+1:174008, y9+1:80024];[M11+2:1079275, M11+2:230633]}{16276@[y9+1:814]}{16277@[y9+1:495]}	{16271@6}{16276@1}{16277@1}		ApoA1	130	KWHEEVEIYR	KWHEEVEIYR(1)	1387.69	4.2091	{16271@[y7+1, y8+1];[M10+2, M10+2]}{16274@[y7+1]}{16275@[y7+1, y9+1];[b8+1]}	{16271@[y7+1:937.45906, y8+1:1074.52055];[M10+2:721.85594, M10+2:737.84270]}{16274@[y7+1:937.46804]}{16275@[y7+1:937.46670, y9+1:1260.60197];[b8+1:1105.53506]}	{16271@[y7+1:-0.00348, y8+1:-0.00090];[M10+2:-0.00168, M10+2:-0.00024]}{16274@[y7+1:0.00550]}{16275@[y7+1:0.00416, y9+1:0.00121];[b8+1:0.00378]}	{16271@[y7+1:-3.71, y8+1:-0.84];[M10+2:-1.16, M10+2:-0.16]}{16274@[y7+1:5.87]}{16275@[y7+1:4.44, y9+1:0.96];[b8+1:3.42]}	{16271@[y7+1:48986, y8+1:61608];[M10+2:759186, M10+2:2013824]}{16274@[y7+1:3240]}{16275@[y7+1:582, y9+1:150];[b8+1:222]}	{16271@4}{16274@1}{16275@3}		10.3607	158.001	24	2;2	4	7	1
ApoA1	ApoA1	130	156	ApoA1ApoA1130156	K	K	1	W:\Collaboration_Services\Raw_files_FPL\Fusion Lumos\2021\Zheng\20211204_ZS_WP_SV_ns1_xlms\2021-12-04-10-10-24\Task1-Calibrate\20211203_ZS_WP_SV_ns1_R1-calib.mzML	12241	12222	666.08	4	2660.29	Intra	K;K		ApoA1	156	QKVQELQDK	QKVQELQDK(2)	1114.6	6.09143	{12241@[y4+1, y5+1, y6+1, y7+1];[M9+2, M9+2]}{12244@[b1+1];[y3+1]}{12245@}	{12241@[y4+1:503.28515, y5+1:632.32114, y6+1:760.38263, y7+1:859.45269];[M9+2:585.31180, M9+2:601.29752]}{12244@[b1+1:129.06683];[y3+1:390.20049]}{12245@}	{12241@[y4+1:0.00276, y5+1:-0.00385, y6+1:-0.00093, y7+1:0.00072];[M9+2:0.00025, M9+2:-0.00039]}{12244@[b1+1:0.00097];[y3+1:0.00217]}{12245@}	{12241@[y4+1:5.50, y5+1:-6.09, y6+1:-1.22, y7+1:0.83];[M9+2:0.22, M9+2:-0.32]}{12244@[b1+1:7.59];[y3+1:5.57]}{12245@}	{12241@[y4+1:3277, y5+1:6892, y6+1:19802, y7+1:11948];[M9+2:109556, M9+2:27489]}{12244@[b1+1:90];[y3+1:16]}{12245@}	{12241@6}{12244@2}{12245@0}		ApoA1	130	KWHEEVEIYR	KWHEEVEIYR(1)	1387.69	5.15339	{12241@[y6+1, y7+1, y8+1];[M10+2, M10+2]}{12242@}{12243@}	{12241@[y6+1:808.42022, y7+1:937.45712, y8+1:1074.52168];[M10+2:721.85730, M10+2:737.84283]}{12242@}{12243@}	{12241@[y6+1:0.00028, y7+1:-0.00541, y8+1:0.00023];[M10+2:0.00104, M10+2:0.00002]}{12242@}{12243@}	{12241@[y6+1:0.35, y7+1:-5.78, y8+1:0.21];[M10+2:0.72, M10+2:0.01]}{12242@}{12243@}	{12241@[y6+1:3756, y7+1:4492, y8+1:4137];[M10+2:69458, M10+2:218388]}{12242@}{12243@}	{12241@5}{12242@0}{12243@0}		11.2448	158.002	2	2;2	4	2	1
ApoA1	ApoA1	130	156	ApoA1ApoA1130156	K	K	3	W:\Collaboration_Services\Raw_files_FPL\Fusion Lumos\2021\Zheng\20211204_ZS_WP_SV_ns1_xlms\2021-12-04-10-10-24\Task1-Calibrate\20211203_ZS_WP_SV_ns1_R3-calib.mzML	11633	11624	666.08	4	2660.29	Intra	K;K		ApoA1	156	QKVQELQDK	QKVQELQDK(2)	1114.6	8.13799	{11633@[y2+1, y3+1, y4+1, y5+1, y6+1, y7+1];[M9+2, M9+2]}{11637@[y3+1]}{11638@}	{11633@[y2+1:262.13937, y3+1:390.19911, y4+1:503.28191, y5+1:632.32361, y6+1:760.38225, y7+1:859.45027];[M9+2:585.31150, M9+2:601.29748]}{11637@[y3+1:390.20026]}{11638@}	{11633@[y2+1:-0.00037, y3+1:0.00079, y4+1:-0.00048, y5+1:-0.00137, y6+1:-0.00131, y7+1:-0.00170];[M9+2:-0.00035, M9+2:-0.00046]}{11637@[y3+1:0.00193]}{11638@}	{11633@[y2+1:-1.43, y3+1:2.02, y4+1:-0.95, y5+1:-2.17, y6+1:-1.72, y7+1:-1.98];[M9+2:-0.30, M9+2:-0.39]}{11637@[y3+1:4.97]}{11638@}	{11633@[y2+1:4825, y3+1:5375, y4+1:9858, y5+1:14173, y6+1:19079, y7+1:20180];[M9+2:182929, M9+2:37550]}{11637@[y3+1:54]}{11638@}	{11633@8}{11637@1}{11638@0}		ApoA1	130	KWHEEVEIYR	KWHEEVEIYR(1)	1387.69	5.22453	{11633@[b4+1];[y7+1, y8+1];[M10+2, M10+2]}{11635@[y3+1, y7+1]}{11636@[y7+1, y9+1]}	{11633@[b4+1:635.29218];[y7+1:937.45953, y8+1:1074.51454];[M10+2:721.85663, M10+2:737.84225]}{11635@[y3+1:451.26692, y7+1:937.46575]}{11636@[y7+1:937.46585, y9+1:1260.60083]}	{11633@[b4+1:-0.00144];[y7+1:-0.00301, y8+1:-0.00691];[M10+2:-0.00031, M10+2:-0.00113]}{11635@[y3+1:0.00057, y7+1:0.00321]}{11636@[y7+1:0.00332, y9+1:0.00007]}	{11633@[b4+1:-2.27];[y7+1:-3.21, y8+1:-6.43];[M10+2:-0.22, M10+2:-0.77]}{11635@[y3+1:1.28, y7+1:3.43]}{11636@[y7+1:3.54, y9+1:0.06]}	{11633@[b4+1:3905];[y7+1:4481, y8+1:7428];[M10+2:90776, M10+2:371736]}{11635@[y3+1:146, y7+1:286]}{11636@[y7+1:126, y9+1:43]}	{11633@5}{11635@2}{11636@2}		13.3625	158.006	5	2;2	4	6	1
ApoA1	ApoA1	130	156	ApoA1ApoA1130156	K	K	3	W:\Collaboration_Services\Raw_files_FPL\Fusion Lumos\2021\Zheng\20211204_ZS_WP_SV_ns1_xlms\2021-12-04-10-10-24\Task1-Calibrate\20211203_ZS_WP_SV_ns1_R3-calib.mzML	11642	11624	533.066	5	2660.29	Intra	K;K		ApoA1	156	QKVQELQDK	QKVQELQDK(2)	1114.6	8.12167	{11642@[y2+1, y3+1, y4+1, y5+1, y6+1, y7+1];[M9+2, M9+2]}{11644@[y8+1]}{11645@[y3+1]}	{11642@[y2+1:262.14046, y3+1:390.19838, y4+1:503.28485, y5+1:632.32495, y6+1:760.38448, y7+1:859.45058];[M9+2:585.31189, M9+2:601.29742]}{11644@[y8+1:1073.53411]}{11645@[y3+1:390.20028]}	{11642@[y2+1:0.00072, y3+1:0.00006, y4+1:0.00246, y5+1:-0.00004, y6+1:0.00092, y7+1:-0.00139];[M9+2:0.00043, M9+2:-0.00060]}{11644@[y8+1:0.00454]}{11645@[y3+1:0.00196]}	{11642@[y2+1:2.74, y3+1:0.14, y4+1:4.90, y5+1:-0.06, y6+1:1.21, y7+1:-1.62];[M9+2:0.37, M9+2:-0.50]}{11644@[y8+1:4.23]}{11645@[y3+1:5.03]}	{11642@[y2+1:4402, y3+1:9033, y4+1:11044, y5+1:12591, y6+1:10783, y7+1:11121];[M9+2:30826, M9+2:179531]}{11644@[y8+1:70]}{11645@[y3+1:34]}	{11642@8}{11644@1}{11645@1}		ApoA1	130	KWHEEVEIYR	KWHEEVEIYR(1)	1387.69	5.20021	[y2+1, y3+1, y4+1];[M10+3, M10+3]	[y2+1:338.18300, y3+1:451.26709, y4+1:580.30904];[M10+3:481.57387, M10+3:492.23114]	[y2+1:0.00071, y3+1:0.00074, y4+1:0.00010];[M10+3:0.00077, M10+3:0.00051]	[y2+1:2.12, y3+1:1.64, y4+1:0.18];[M10+3:0.54, M10+3:0.35]	[y2+1:7877, y3+1:8639, y4+1:14474];[M10+3:381739, M10+3:30464]	5		13.3219	158.006	9	2;2	4	7	1
ApoA1	ApoA1	141	156	ApoA1ApoA1141156	K	K	1	W:\Collaboration_Services\Raw_files_FPL\Fusion Lumos\2021\Zheng\20211204_ZS_WP_SV_ns1_xlms\2021-12-04-10-10-24\Task1-Calibrate\20211203_ZS_WP_SV_ns1_R1-calib.mzML	13968	13951	637.328	4	2545.28	Intra	K;K		ApoA1	141	QKVAPLGEEFR	QKVAPLGEEFR(2)	1272.68	17.114	[y2+1, y3+1, y4+1, y6+1, y7+2, y8+1, y9+1];[b2+1, b3+1, b3+1, b4+1, b4+1, b5+1, b6+1, b6+1];[M11+2, M11+2]	[y2+1:322.18783, y3+1:451.23056, y4+1:580.27223, y6+1:750.37971, y7+2:424.21932, y8+1:918.46785, y9+1:1017.53681];[b2+1:343.14307, b3+1:410.23954, b3+1:442.21206, b4+1:481.27666, b4+1:513.24908, b5+1:610.30105, b6+1:691.41163, b6+1:723.38430];[M11+2:664.35465, M11+2:680.34041]	[y2+1:0.00046, y3+1:0.00060, y4+1:-0.00033, y6+1:0.00163, y7+2:0.00052, y8+1:-0.00010, y9+1:0.00044];[b2+1:-0.00039, b3+1:-0.00025, b3+1:0.00019, b4+1:-0.00025, b4+1:0.00009, b5+1:-0.00070, b6+1:-0.00210, b6+1:-0.00151];[M11+2:0.00156, M11+2:0.00099]	[y2+1:1.44, y3+1:1.34, y4+1:-0.56, y6+1:2.18, y7+2:0.61, y8+1:-0.11, y9+1:0.43];[b2+1:-1.13, b3+1:-0.61, b3+1:0.44, b4+1:-0.51, b4+1:0.19, b5+1:-1.14, b6+1:-3.04, b6+1:-2.09];[M11+2:1.18, M11+2:0.73]	[y2+1:143974, y3+1:93976, y4+1:42861, y6+1:83430, y7+2:460905, y8+1:305565, y9+1:92015];[b2+1:27830, b3+1:37434, b3+1:77872, b4+1:49345, b4+1:97040, b5+1:30555, b6+1:18146, b6+1:20307];[M11+2:720996, M11+2:563703]	17		ApoA1	156	QKVQELQDK	QKVQELQDK(2)	1114.6	8.1048	{13968@[y2+1, y3+1, y4+1, y5+1, y6+1, y7+1];[M9+2, M9+2]}{13970@[y3+1]}{13971@[y8+1]}	{13968@[y2+1:262.13991, y3+1:390.19933, y4+1:503.28301, y5+1:632.32621, y6+1:760.38353, y7+1:859.45267];[M9+2:585.31226, M9+2:601.29800]}{13970@[y3+1:390.20023]}{13971@[y8+1:1073.53397]}	{13968@[y2+1:0.00017, y3+1:0.00101, y4+1:0.00062, y5+1:0.00123, y6+1:-0.00003, y7+1:0.00070];[M9+2:0.00118, M9+2:0.00056]}{13970@[y3+1:0.00190]}{13971@[y8+1:0.00439]}	{13968@[y2+1:0.64, y3+1:2.59, y4+1:1.24, y5+1:1.95, y6+1:-0.04, y7+1:0.81];[M9+2:1.01, M9+2:0.47]}{13970@[y3+1:4.89]}{13971@[y8+1:4.09]}	{13968@[y2+1:38854, y3+1:47616, y4+1:72099, y5+1:21905, y6+1:171146, y7+1:129994];[M9+2:1283291, M9+2:868932]}{13970@[y3+1:688]}{13971@[y8+1:349]}	{13968@8}{13970@1}{13971@1}		25.2188	158.004	8	2;2	4	4	2
ApoA1	ApoA1	141	156	ApoA1ApoA1141156	K	K	1	W:\Collaboration_Services\Raw_files_FPL\Fusion Lumos\2021\Zheng\20211204_ZS_WP_SV_ns1_xlms\2021-12-04-10-10-24\Task1-Calibrate\20211203_ZS_WP_SV_ns1_R1-calib.mzML	14052	14040	637.328	4	2545.28	Intra	K;K		ApoA1	141	QKVAPLGEEFR	QKVAPLGEEFR(2)	1272.68	9.13713	[y2+1, y3+1, y7+1, y8+1, y9+1];[M11+2, M11+2];[b3+1, b4+1]	[y2+1:322.18819, y3+1:451.22830, y7+1:847.42997, y8+1:918.46612, y9+1:1017.53117];[M11+2:664.35368, M11+2:680.33941];[b3+1:442.21384, b4+1:513.24914]	[y2+1:0.00082, y3+1:-0.00166, y7+1:-0.00088, y8+1:-0.00184, y9+1:-0.00520];[M11+2:-0.00038, M11+2:-0.00102];[b3+1:0.00196, b4+1:0.00015]	[y2+1:2.57, y3+1:-3.68, y7+1:-1.04, y8+1:-2.00, y9+1:-5.12];[M11+2:-0.29, M11+2:-0.75];[b3+1:4.45, b4+1:0.30]	[y2+1:32979, y3+1:54912, y7+1:701502, y8+1:103552, y9+1:54521];[M11+2:310750, M11+2:329082];[b3+1:24823, b4+1:34914]	9		ApoA1	156	QKVQELQDK	QKVQELQDK(2)	1114.6	5.0976	{14052@[y4+1, y6+1, y7+1];[M9+2, M9+2]}{14053@}{14054@[b1+1]}	{14052@[y4+1:503.28353, y6+1:760.38301, y7+1:859.45336];[M9+2:585.31172, M9+2:601.29751]}{14053@}{14054@[b1+1:129.06671]}	{14052@[y4+1:0.00114, y6+1:-0.00055, y7+1:0.00139];[M9+2:0.00010, M9+2:-0.00041]}{14053@}{14054@[b1+1:0.00086]}	{14052@[y4+1:2.27, y6+1:-0.72, y7+1:1.61];[M9+2:0.08, M9+2:-0.34]}{14053@}{14054@[b1+1:6.68]}	{14052@[y4+1:27641, y6+1:68957, y7+1:38638];[M9+2:663277, M9+2:373776]}{14053@}{14054@[b1+1:155]}	{14052@5}{14053@0}{14054@1}		14.2347	158.003	1	2;2	4	11	1
ApoA1	ApoA1	141	156	ApoA1ApoA1141156	K	K	2	W:\Collaboration_Services\Raw_files_FPL\Fusion Lumos\2021\Zheng\20211204_ZS_WP_SV_ns1_xlms\2021-12-04-10-10-24\Task1-Calibrate\20211203_ZS_WP_SV_ns1_R2-calib.mzML	14021	13996	637.328	4	2545.28	Intra	K;K		ApoA1	141	QKVAPLGEEFR	QKVAPLGEEFR(2)	1272.68	17.1856	{14021@[b2+1, b2+1, b3+1, b3+1, b4+1, b4+1, b5+1, b6+1];[y2+1, y3+1, y4+1, y6+1, y7+1, y8+1, y9+1];[M11+2, M11+2]}{14025@[y9+1]}{14026@[y8+1, y9+1]}	{14021@[b2+1:311.17122, b2+1:343.14326, b3+1:410.24018, b3+1:442.21173, b4+1:481.27697, b4+1:513.24845, b5+1:610.30155, b6+1:723.38482];[y2+1:322.18752, y3+1:451.23001, y4+1:580.27256, y6+1:750.37868, y7+1:847.43040, y8+1:918.46727, y9+1:1017.53556];[M11+2:664.35422, M11+2:680.33966]}{14025@[y9+1:1017.53179]}{14026@[y8+1:918.46504, y9+1:1017.53312]}	{14021@[b2+1:-0.00016, b2+1:-0.00019, b3+1:0.00039, b3+1:-0.00014, b4+1:0.00007, b4+1:-0.00053, b5+1:-0.00020, b6+1:-0.00100];[y2+1:0.00015, y3+1:0.00005, y4+1:0.00001, y6+1:0.00060, y7+1:-0.00045, y8+1:-0.00069, y9+1:-0.00081];[M11+2:0.00068, M11+2:-0.00052]}{14025@[y9+1:-0.00458]}{14026@[y8+1:-0.00292, y9+1:-0.00325]}	{14021@[b2+1:-0.50, b2+1:-0.57, b3+1:0.94, b3+1:-0.32, b4+1:0.14, b4+1:-1.04, b5+1:-0.33, b6+1:-1.38];[y2+1:0.47, y3+1:0.11, y4+1:0.02, y6+1:0.80, y7+1:-0.53, y8+1:-0.75, y9+1:-0.80];[M11+2:0.51, M11+2:-0.38]}{14025@[y9+1:-4.51]}{14026@[y8+1:-3.18, y9+1:-3.19]}	{14021@[b2+1:10194, b2+1:19863, b3+1:27177, b3+1:43579, b4+1:35864, b4+1:55780, b5+1:20466, b6+1:17161];[y2+1:87653, y3+1:67351, y4+1:27133, y6+1:56054, y7+1:997690, y8+1:175843, y9+1:57068];[M11+2:460057, M11+2:349526]}{14025@[y9+1:1566]}{14026@[y8+1:681, y9+1:1962]}	{14021@17}{14025@1}{14026@2}		ApoA1	156	QKVQELQDK	QKVQELQDK(2)	1114.6	7.06225	{14021@[y2+1, y3+1, y4+1, y6+1, y7+1];[M9+1, M9+2]}{14023@[b1+1]}{14024@[y3+1]}	{14021@[y2+1:262.13973, y3+1:390.19843, y4+1:503.28230, y6+1:760.38296, y7+1:859.45132];[M9+1:1169.61580, M9+2:601.29742]}{14023@[b1+1:129.06665]}{14024@[y3+1:390.19996]}	{14021@[y2+1:-0.00001, y3+1:0.00011, y4+1:-0.00009, y6+1:-0.00060, y7+1:-0.00065];[M9+1:-0.00028, M9+2:-0.00059]}{14023@[b1+1:0.00079]}{14024@[y3+1:0.00163]}	{14021@[y2+1:-0.05, y3+1:0.27, y4+1:-0.18, y6+1:-0.79, y7+1:-0.76];[M9+1:-0.24, M9+2:-0.49]}{14023@[b1+1:6.20]}{14024@[y3+1:4.19]}	{14021@[y2+1:18824, y3+1:35124, y4+1:52472, y6+1:120001, y7+1:82949];[M9+1:38053, M9+2:493930]}{14023@[b1+1:280]}{14024@[y3+1:512]}	{14021@7}{14023@1}{14024@1}		24.2478	158.002	3	2;2	4	3	17
ApoA1	ApoA1	141	156	ApoA1ApoA1141156	K	K	3	W:\Collaboration_Services\Raw_files_FPL\Fusion Lumos\2021\Zheng\20211204_ZS_WP_SV_ns1_xlms\2021-12-04-10-10-24\Task1-Calibrate\20211203_ZS_WP_SV_ns1_R3-calib.mzML	13557	13553	637.329	4	2545.29	Intra	K;K		ApoA1	141	QKVAPLGEEFR	QKVAPLGEEFR(2)	1272.68	14.0899	[y2+1, y3+1, y4+1, y6+1, y7+2, y8+1, y9+1];[b2+1, b3+1, b3+1, b4+1, b4+1];[M11+2, M11+2]	[y2+1:322.18741, y3+1:451.22934, y4+1:580.27127, y6+1:750.37685, y7+2:424.21906, y8+1:918.46710, y9+1:1017.53671];[b2+1:343.14319, b3+1:410.23931, b3+1:442.21200, b4+1:481.27784, b4+1:513.24739];[M11+2:664.35368, M11+2:680.33982]	[y2+1:0.00004, y3+1:-0.00062, y4+1:-0.00128, y6+1:-0.00123, y7+2:0.00001, y8+1:-0.00085, y9+1:0.00033];[b2+1:-0.00027, b3+1:-0.00048, b3+1:0.00013, b4+1:0.00093, b4+1:-0.00159];[M11+2:-0.00038, M11+2:-0.00018]	[y2+1:0.12, y3+1:-1.38, y4+1:-2.21, y6+1:-1.64, y7+2:0.01, y8+1:-0.93, y9+1:0.33];[b2+1:-0.78, b3+1:-1.18, b3+1:0.30, b4+1:1.95, b4+1:-3.11];[M11+2:-0.29, M11+2:-0.14]	[y2+1:59648, y3+1:35663, y4+1:13905, y6+1:29322, y7+2:141709, y8+1:101733, y9+1:35795];[b2+1:15287, b3+1:23113, b3+1:20771, b4+1:23354, b4+1:24493];[M11+2:233428, M11+2:196969]	14		ApoA1	156	QKVQELQDK	QKVQELQDK(2)	1114.6	7.06134	{13557@[y3+1, y4+1, y5+1, y6+1, y7+1];[M9+2, M9+1]}{13561@}{13562@[b1+1];[y3+1]}	{13557@[y3+1:390.19618, y4+1:503.28172, y5+1:632.32237, y6+1:760.38387, y7+1:859.45362];[M9+2:585.31182, M9+1:1201.58663]}{13561@}{13562@[b1+1:129.06671];[y3+1:390.20013]}	{13557@[y3+1:-0.00214, y4+1:-0.00067, y5+1:-0.00261, y6+1:0.00032, y7+1:0.00165];[M9+2:0.00029, M9+1:-0.00153]}{13561@}{13562@[b1+1:0.00085];[y3+1:0.00181]}	{13557@[y3+1:-5.51, y4+1:-1.33, y5+1:-4.13, y6+1:0.42, y7+1:1.92];[M9+2:0.25, M9+1:-1.27]}{13561@}{13562@[b1+1:6.65];[y3+1:4.64]}	{13557@[y3+1:10367, y4+1:26366, y5+1:16948, y6+1:71104, y7+1:45363];[M9+2:469381, M9+1:11980]}{13561@}{13562@[b1+1:162];[y3+1:77]}	{13557@7}{13561@0}{13562@2}		21.1513	158.005	2	2;2	4	9	4
ApoA1	ApoA1	141	163	ApoA1ApoA1141163	K	K	1	W:\Collaboration_Services\Raw_files_FPL\Fusion Lumos\2021\Zheng\20211204_ZS_WP_SV_ns1_xlms\2021-12-04-10-10-24\Task1-Calibrate\20211203_ZS_WP_SV_ns1_R1-calib.mzML	25205	25163	825.186	4	3296.71	Intra	K;K		ApoA1	163	VQELQDKLSPLAQELR	VQELQDKLSPLAQELR(7)	1866.02	31.2456	{25205@[y2+1, y3+1, y4+1, y5+1, y6+1, y7+1, y8+1, y9+1, y10+1, y11+1, y11+1, y12+1, y14+1, y14+2];[b3+1, b4+1, b5+1, b6+1, b7+1, b7+1, b8+1, b8+1, b9+1, b9+1, b11+1, b12+1, b12+1, b13+1, b15+1];[M16+2, M16+2]}{25209@[b2+1]}{25210@[b2+1];[y9+1, y11+1]}	{25205@[y2+1:288.20268, y3+1:417.24555, y4+1:545.30417, y5+1:616.34150, y6+1:729.42538, y7+1:826.47791, y8+1:913.50993, y9+1:1026.59421, y10+1:1240.67211, y11+1:1323.72834, y11+1:1355.69724, y12+1:1483.75443, y14+1:1693.91273, y14+2:863.44679];[b3+1:357.17673, b4+1:470.26093, b5+1:598.31928, b6+1:713.34849, b7+1:895.45811, b7+1:927.42389, b8+1:1008.53654, b8+1:1040.50829, b9+1:1095.56763, b9+1:11…	{25205@[y2+1:-0.00034, y3+1:-0.00006, y4+1:-0.00002, y5+1:0.00020, y6+1:0.00002, y7+1:-0.00022, y8+1:-0.00023, y9+1:-0.00001, y10+1:0.00029, y11+1:0.00166, y11+1:-0.00153, y12+1:-0.00291, y14+1:0.00081, y14+2:0.00231];[b3+1:-0.00013, b4+1:0.00001, b5+1:-0.00022, b6+1:0.00204, b7+1:0.00614, b7+1:-0.00016, b8+1:0.00050, b8+1:0.00018, b9+1:-0.00043, b9+1:-0.00023, b11+1:-0.00163, b12+1:-0.00123, b12…	{25205@[y2+1:-1.18, y3+1:-0.14, y4+1:-0.03, y5+1:0.32, y6+1:0.03, y7+1:-0.27, y8+1:-0.25, y9+1:-0.01, y10+1:0.23, y11+1:1.25, y11+1:-1.13, y12+1:-1.96, y14+1:0.48, y14+2:1.34];[b3+1:-0.36, b4+1:0.02, b5+1:-0.37, b6+1:2.87, b7+1:6.87, b7+1:-0.18, b8+1:0.50, b8+1:0.18, b9+1:-0.39, b9+1:-0.21, b11+1:-1.22, b12+1:-0.90, b12+1:-0.74, b13+1:-0.96, b15+1:-0.39];[M16+2:0.18, M16+2:-0.21]}{25209@[b2+1:-4.…	{25205@[y2+1:39433, y3+1:41854, y4+1:117006, y5+1:187479, y6+1:63026, y7+1:1643822, y8+1:1206610, y9+1:329710, y10+1:29575, y11+1:30492, y11+1:34604, y12+1:34170, y14+1:21496, y14+2:35358];[b3+1:42867, b4+1:43321, b5+1:38458, b6+1:61784, b7+1:102908, b7+1:98275, b8+1:149143, b8+1:230872, b9+1:209151, b9+1:275565, b11+1:39427, b12+1:21008, b12+1:44528, b13+1:31818, b15+1:22358];[M16+2:523739, M16+…	{25205@31}{25209@1}{25210@3}		ApoA1	141	QKVAPLGEEFR	QKVAPLGEEFR(2)	1272.68	14.1338	{25205@[b2+1, b3+1, b3+1, b4+1, b4+1];[y2+1, y3+1, y5+1, y6+1, y7+2, y8+1, y9+1];[M11+2, M11+2]}{25207@[y8+1, y9+1]}{25208@[y8+1, y9+1]}	{25205@[b2+1:311.17135, b3+1:410.23997, b3+1:442.21191, b4+1:481.27732, b4+1:513.24883];[y2+1:322.18691, y3+1:451.22982, y5+1:637.29377, y6+1:750.37768, y7+2:424.21908, y8+1:918.46750, y9+1:1017.53500];[M11+2:664.35393, M11+2:680.33980]}{25207@[y8+1:918.46482, y9+1:1017.53144]}{25208@[y8+1:918.46473, y9+1:1017.53135]}	{25205@[b2+1:-0.00002, b3+1:0.00018, b3+1:0.00004, b4+1:0.00041, b4+1:-0.00016];[y2+1:-0.00045, y3+1:-0.00014, y5+1:-0.00025, y6+1:-0.00040, y7+2:0.00005, y8+1:-0.00046, y9+1:-0.00137];[M11+2:0.00012, M11+2:-0.00023]}{25207@[y8+1:-0.00314, y9+1:-0.00493]}{25208@[y8+1:-0.00322, y9+1:-0.00503]}	{25205@[b2+1:-0.08, b3+1:0.43, b3+1:0.08, b4+1:0.86, b4+1:-0.31];[y2+1:-1.41, y3+1:-0.32, y5+1:-0.39, y6+1:-0.54, y7+2:0.05, y8+1:-0.50, y9+1:-1.35];[M11+2:0.09, M11+2:-0.17]}{25207@[y8+1:-3.42, y9+1:-4.85]}{25208@[y8+1:-3.52, y9+1:-4.94]}	{25205@[b2+1:25375, b3+1:43087, b3+1:30160, b4+1:24812, b4+1:21358];[y2+1:29776, y3+1:35781, y5+1:177040, y6+1:33423, y7+2:68665, y8+1:503745, y9+1:312158];[M11+2:1621915, M11+2:738754]}{25207@[y8+1:6413, y9+1:7619]}{25208@[y8+1:2619, y9+1:1948]}	{25205@14}{25207@2}{25208@2}		45.3794	158.01	22	2;2	4	8	1
ApoA1	ApoA1	141	163	ApoA1ApoA1141163	K	K	1	W:\Collaboration_Services\Raw_files_FPL\Fusion Lumos\2021\Zheng\20211204_ZS_WP_SV_ns1_xlms\2021-12-04-10-10-24\Task1-Calibrate\20211203_ZS_WP_SV_ns1_R1-calib.mzML	25418	25390	825.185	4	3296.71	Intra	K;K		ApoA1	163	VQELQDKLSPLAQELR	VQELQDKLSPLAQELR(7)	1866.02	10.1704	{25418@[y4+1, y5+1, y7+1, y8+1, y9+1];[b8+1, b9+1, b9+1];[M16+2, M16+2]}{25425@}{25426@}	{25418@[y4+1:545.30606, y5+1:616.33969, y7+1:826.48037, y8+1:913.51110, y9+1:1026.59702];[b8+1:1040.51267, b9+1:1095.57344, b9+1:1127.53916];[M16+2:961.02414, M16+2:977.01106]}{25425@}{25426@}	{25418@[y4+1:0.00188, y5+1:-0.00161, y7+1:0.00224, y8+1:0.00095, y9+1:0.00280];[b8+1:0.00456, b9+1:0.00538, b9+1:-0.00098];[M16+2:0.00209, M16+2:0.00384]}{25425@}{25426@}	{25418@[y4+1:3.45, y5+1:-2.61, y7+1:2.71, y8+1:1.04, y9+1:2.73];[b8+1:4.39, b9+1:4.91, b9+1:-0.87];[M16+2:1.09, M16+2:1.97]}{25425@}{25426@}	{25418@[y4+1:6360, y5+1:11754, y7+1:53350, y8+1:72852, y9+1:17215];[b8+1:5996, b9+1:13233, b9+1:15037];[M16+2:27260, M16+2:58772]}{25425@}{25426@}	{25418@10}{25425@0}{25426@0}		ApoA1	141	QKVAPLGEEFR	QKVAPLGEEFR(2)	1272.68	6.17355	{25418@[y5+1, y7+1, y8+1, y9+1];[M11+2, M11+2]}{25423@[y8+1]}{25424@[y8+1]}	{25418@[y5+1:637.29762, y7+1:847.43136, y8+1:918.47049, y9+1:1017.54150];[M11+2:664.35485, M11+2:680.34035]}{25423@[y8+1:918.46826]}{25424@[y8+1:918.46817]}	{25418@[y5+1:0.00360, y7+1:0.00052, y8+1:0.00254, y9+1:0.00513];[M11+2:0.00196, M11+2:0.00088]}{25423@[y8+1:0.00031]}{25424@[y8+1:0.00021]}	{25418@[y5+1:5.66, y7+1:0.61, y8+1:2.76, y9+1:5.05];[M11+2:1.48, M11+2:0.65]}{25423@[y8+1:0.33]}{25424@[y8+1:0.23]}	{25418@[y5+1:7096, y7+1:60716, y8+1:19191, y9+1:12126];[M11+2:130991, M11+2:56847]}{25423@[y8+1:508]}{25424@[y8+1:112]}	{25418@6}{25423@1}{25424@1}		16.344	158.007	36	2;2	4	2	1
ApoA1	ApoA1	141	163	ApoA1ApoA1141163	K	K	2	W:\Collaboration_Services\Raw_files_FPL\Fusion Lumos\2021\Zheng\20211204_ZS_WP_SV_ns1_xlms\2021-12-04-10-10-24\Task1-Calibrate\20211203_ZS_WP_SV_ns1_R2-calib.mzML	25125	25092	825.184	4	3296.71	Intra	K;K		ApoA1	163	VQELQDKLSPLAQELR	VQELQDKLSPLAQELR(7)	1866.02	30.1817	{25125@[y2+1, y3+1, y4+1, y5+1, y6+1, y7+2, y8+1, y9+1, y10+1, y11+1, y11+1, y12+1, y12+1, y14+2];[b3+1, b4+1, b5+1, b6+1, b7+1, b7+1, b8+1, b8+1, b9+1, b9+1, b11+1, b12+1, b13+1, b15+1];[M16+2, M16+2]}{25129@[b2+1];[y9+1, y10+1]}{25130@[b2+1, b8+1];[y11+1]}	{25125@[y2+1:288.20325, y3+1:417.24600, y4+1:545.30468, y5+1:616.34218, y6+1:729.42749, y7+2:413.74341, y8+1:913.51155, y9+1:1026.59628, y10+1:1240.67433, y11+1:1323.73087, y11+1:1355.70204, y12+1:1451.78753, y12+1:1483.75908, y14+2:863.44920];[b3+1:357.17741, b4+1:470.26154, b5+1:598.32068, b6+1:713.34808, b7+1:895.45843, b7+1:927.42646, b8+1:1008.53877, b8+1:1040.51074, b9+1:1095.57017, b9+1:11…	{25125@[y2+1:0.00023, y3+1:0.00039, y4+1:0.00049, y5+1:0.00088, y6+1:0.00212, y7+2:0.00141, y8+1:0.00139, y9+1:0.00206, y10+1:0.00251, y11+1:0.00418, y11+1:0.00328, y12+1:0.00227, y12+1:0.00174, y14+2:0.00713];[b3+1:0.00055, b4+1:0.00062, b5+1:0.00118, b6+1:0.00163, b7+1:0.00646, b7+1:0.00242, b8+1:0.00274, b8+1:0.00263, b9+1:0.00211, b9+1:0.00245, b11+1:0.00267, b12+1:0.00287, b13+1:0.00119, b15…	{25125@[y2+1:0.80, y3+1:0.93, y4+1:0.90, y5+1:1.43, y6+1:2.91, y7+2:1.71, y8+1:1.53, y9+1:2.01, y10+1:2.02, y11+1:3.16, y11+1:2.42, y12+1:1.56, y12+1:1.17, y14+2:4.13];[b3+1:1.55, b4+1:1.31, b5+1:1.97, b6+1:2.29, b7+1:7.23, b7+1:2.61, b8+1:2.72, b8+1:2.53, b9+1:1.93, b9+1:2.18, b11+1:2.00, b12+1:2.04, b13+1:0.78, b15+1:1.66];[M16+2:2.16, M16+2:1.79]}{25129@[b2+1:-3.87];[y9+1:4.50, y10+1:-3.89]}{2…	{25125@[y2+1:96607, y3+1:107094, y4+1:332031, y5+1:507940, y6+1:165122, y7+2:293288, y8+1:3387098, y9+1:897257, y10+1:78124, y11+1:71264, y11+1:102065, y12+1:57453, y12+1:75416, y14+2:95361];[b3+1:131716, b4+1:108966, b5+1:115321, b6+1:180297, b7+1:262567, b7+1:240538, b8+1:411123, b8+1:603085, b9+1:548940, b9+1:692640, b11+1:93443, b12+1:91337, b13+1:62457, b15+1:58989];[M16+2:1496686, M16+2:261…	{25125@30}{25129@3}{25130@3}		ApoA1	141	QKVAPLGEEFR	QKVAPLGEEFR(2)	1272.68	14.122	{25125@[y2+1, y3+1, y5+1, y6+1, y7+2, y8+1, y9+1];[b2+1, b3+1, b3+1, b4+1, b4+1];[M11+2, M11+2]}{25127@[y8+1, y9+1]}{25128@[y8+1, y9+1]}	{25125@[y2+1:322.18769, y3+1:451.23062, y5+1:637.29513, y6+1:750.37925, y7+2:424.21981, y8+1:918.46955, y9+1:1017.53664];[b2+1:343.14384, b3+1:410.24023, b3+1:442.21204, b4+1:481.27769, b4+1:513.24962];[M11+2:664.35513, M11+2:680.34108]}{25127@[y8+1:918.46546, y9+1:1017.53216]}{25128@[y8+1:918.46538, y9+1:1017.53350]}	{25125@[y2+1:0.00032, y3+1:0.00066, y5+1:0.00112, y6+1:0.00117, y7+2:0.00150, y8+1:0.00159, y9+1:0.00027];[b2+1:0.00038, b3+1:0.00044, b3+1:0.00017, b4+1:0.00078, b4+1:0.00063];[M11+2:0.00252, M11+2:0.00233]}{25127@[y8+1:-0.00249, y9+1:-0.00421]}{25128@[y8+1:-0.00258, y9+1:-0.00287]}	{25125@[y2+1:1.01, y3+1:1.48, y5+1:1.75, y6+1:1.55, y7+2:1.78, y8+1:1.74, y9+1:0.26];[b2+1:1.12, b3+1:1.07, b3+1:0.38, b4+1:1.63, b4+1:1.24];[M11+2:1.90, M11+2:1.71]}{25127@[y8+1:-2.72, y9+1:-4.15]}{25128@[y8+1:-2.81, y9+1:-2.83]}	{25125@[y2+1:96988, y3+1:118254, y5+1:517616, y6+1:108254, y7+2:192030, y8+1:1319666, y9+1:897751];[b2+1:61143, b3+1:108791, b3+1:77157, b4+1:85594, b4+1:74489];[M11+2:4054564, M11+2:1673017]}{25127@[y8+1:26473, y9+1:27038]}{25128@[y8+1:4026, y9+1:378]}	{25125@14}{25127@2}{25128@2}		44.3038	158.005	21	2;2	4	3	1
ApoA1	ApoA1	141	163	ApoA1ApoA1141163	K	K	2	W:\Collaboration_Services\Raw_files_FPL\Fusion Lumos\2021\Zheng\20211204_ZS_WP_SV_ns1_xlms\2021-12-04-10-10-24\Task1-Calibrate\20211203_ZS_WP_SV_ns1_R2-calib.mzML	25199	25124	1099.91	3	3296.71	Intra	K;K		ApoA1	163	VQELQDKLSPLAQELR	VQELQDKLSPLAQELR(7)	1866.02	10.1448	{25199@[y4+1, y5+1, y7+1, y8+1, y9+1, y11+1];[b8+1, b8+1];[M16+1, M16+2]}{25203@[y9+1, y13+1]}{25204@[y10+1]}	{25199@[y4+1:545.30509, y5+1:616.34357, y7+1:826.47682, y8+1:913.50781, y9+1:1026.58928, y11+1:1323.72441];[b8+1:1008.53489, b8+1:1040.50847];[M16+1:1921.03366, M16+2:977.00710]}{25203@[y9+1:1026.60038, y13+1:1564.86724]}{25204@[y10+1:1240.66713]}	{25199@[y4+1:0.00090, y5+1:0.00227, y7+1:-0.00131, y8+1:-0.00235, y9+1:-0.00494, y11+1:-0.00228];[b8+1:-0.00114, b8+1:0.00036];[M16+1:-0.00526, M16+2:-0.00408]}{25203@[y9+1:0.00616, y13+1:-0.00208]}{25204@[y10+1:-0.00469]}	{25199@[y4+1:1.66, y5+1:3.69, y7+1:-1.58, y8+1:-2.57, y9+1:-4.82, y11+1:-1.72];[b8+1:-1.13, b8+1:0.35];[M16+1:-2.74, M16+2:-2.09]}{25203@[y9+1:6.01, y13+1:-1.33]}{25204@[y10+1:-3.78]}	{25199@[y4+1:10459, y5+1:13186, y7+1:72350, y8+1:77745, y9+1:21516, y11+1:13483];[b8+1:18427, b8+1:18784];[M16+1:89960, M16+2:35767]}{25203@[y9+1:42, y13+1:91]}{25204@[y10+1:71]}	{25199@10}{25203@2}{25204@1}		ApoA1	141	QKVAPLGEEFR	QKVAPLGEEFR(2)	1272.68	6.13684	[y5+1, y7+1, y8+1, y9+1];[M11+1, M11+2]	[y5+1:637.29512, y7+1:847.42855, y8+1:918.46679, y9+1:1017.53575];[M11+1:1327.69758, M11+2:680.33995]	[y5+1:0.00110, y7+1:-0.00229, y8+1:-0.00116, y9+1:-0.00062];[M11+1:-0.00289, M11+2:0.00008]	[y5+1:1.73, y7+1:-2.71, y8+1:-1.27, y9+1:-0.61];[M11+1:-2.18, M11+2:0.06]	[y5+1:24661, y7+1:96884, y8+1:58745, y9+1:43353];[M11+1:75144, M11+2:52491]	6		16.2816	158.005	42	2;2	4	18	13
ApoA1	ApoA1	141	163	ApoA1ApoA1141163	K	K	2	W:\Collaboration_Services\Raw_files_FPL\Fusion Lumos\2021\Zheng\20211204_ZS_WP_SV_ns1_xlms\2021-12-04-10-10-24\Task1-Calibrate\20211203_ZS_WP_SV_ns1_R2-calib.mzML	26589	26545	933.226	4	3728.87	Intra	K;K		ApoA1	163	QKVQELQDKLSPLAQELR	QK[DSSO:DSSO_hydro_K on K]VQELQDKLSPLAQELR(9)	2298.19	5.08578	[y3+1, y5+1, y7+1, y8+1, y9+1]	[y3+1:417.24281, y5+1:616.33952, y7+1:826.47811, y8+1:913.50963, y9+1:1026.59230]	[y3+1:-0.00280, y5+1:-0.00178, y7+1:-0.00002, y8+1:-0.00053, y9+1:-0.00192]	[y3+1:-6.72, y5+1:-2.89, y7+1:-0.02, y8+1:-0.58, y9+1:-1.87]	[y3+1:5681, y5+1:6683, y7+1:62280, y8+1:65528, y9+1:16670]	5		ApoA1	141	QKVAPLGEEFR	QKVAPLGEEFR(2)	1272.68	5.07368	{26589@[b3+1];[y7+1, y8+1];[M11+2, M11+2]}{26591@[y9+1]}{26592@[y8+1]}	{26589@[b3+1:410.23936];[y7+1:847.43169, y8+1:918.46448];[M11+2:664.35286, M11+2:680.33892]}{26591@[y9+1:1017.53446]}{26592@[y8+1:918.46760]}	{26589@[b3+1:-0.00043];[y7+1:0.00084, y8+1:-0.00348];[M11+2:-0.00203, M11+2:-0.00199]}{26591@[y9+1:-0.00191]}{26592@[y8+1:-0.00036]}	{26589@[b3+1:-1.06];[y7+1:0.99, y8+1:-3.79];[M11+2:-1.53, M11+2:-1.47]}{26591@[y9+1:-1.88]}{26592@[y8+1:-0.39]}	{26589@[b3+1:7191];[y7+1:23531, y8+1:10433];[M11+2:63191, M11+2:30373]}{26591@[y9+1:121]}{26592@[y8+1:104]}	{26589@5}{26591@1}{26592@1}		10.1595	158.003	72	0;2	2	-	8
ApoA1	ApoA1	141	163	ApoA1ApoA1141163	K	K	3	W:\Collaboration_Services\Raw_files_FPL\Fusion Lumos\2021\Zheng\20211204_ZS_WP_SV_ns1_xlms\2021-12-04-10-10-24\Task1-Calibrate\20211203_ZS_WP_SV_ns1_R3-calib.mzML	24327	24280	825.184	4	3296.71	Intra	K;K		ApoA1	163	VQELQDKLSPLAQELR	VQELQDKLSPLAQELR(7)	1866.02	29.1833	{24327@[y2+1, y3+1, y4+1, y5+1, y6+1, y7+2, y8+1, y9+1, y10+1, y11+1, y11+1, y12+1];[b3+1, b4+1, b5+1, b6+1, b7+1, b8+1, b8+1, b9+1, b9+1, b11+1, b11+1, b12+1, b12+1, b13+1, b15+1];[M16+2, M16+2]}{24331@[b2+1];[y9+1, y10+1]}{24332@[b2+1];[y11+1, y13+1]}	{24327@[y2+1:288.20360, y3+1:417.24652, y4+1:545.30534, y5+1:616.34246, y6+1:729.42706, y7+2:413.74349, y8+1:913.51173, y9+1:1026.59628, y10+1:1240.67356, y11+1:1323.72791, y11+1:1355.70182, y12+1:1483.75724];[b3+1:357.17748, b4+1:470.26193, b5+1:598.32118, b6+1:713.34946, b7+1:927.42555, b8+1:1008.53911, b8+1:1040.51070, b9+1:1095.56974, b9+1:1127.54226, b11+1:1305.70847, b11+1:1337.68073, b12+1…	{24327@[y2+1:0.00058, y3+1:0.00091, y4+1:0.00115, y5+1:0.00116, y6+1:0.00169, y7+2:0.00157, y8+1:0.00158, y9+1:0.00206, y10+1:0.00174, y11+1:0.00122, y11+1:0.00305, y12+1:-0.00010];[b3+1:0.00061, b4+1:0.00101, b5+1:0.00168, b6+1:0.00301, b7+1:0.00150, b8+1:0.00308, b8+1:0.00259, b9+1:0.00168, b9+1:0.00212, b11+1:0.00358, b11+1:0.00376, b12+1:-0.00082, b12+1:0.00224, b13+1:0.00143, b15+1:0.00155];…	{24327@[y2+1:2.03, y3+1:2.19, y4+1:2.11, y5+1:1.89, y6+1:2.33, y7+2:1.90, y8+1:1.73, y9+1:2.01, y10+1:1.40, y11+1:0.92, y11+1:2.25, y12+1:-0.07];[b3+1:1.73, b4+1:2.15, b5+1:2.81, b6+1:4.23, b7+1:1.62, b8+1:3.06, b8+1:2.49, b9+1:1.53, b9+1:1.88, b11+1:2.74, b11+1:2.81, b12+1:-0.60, b12+1:1.59, b13+1:0.93, b15+1:0.87];[M16+2:1.99, M16+2:2.06]}{24331@[b2+1:-2.32];[y9+1:6.04, y10+1:-3.51]}{24332@[b2+…	{24327@[y2+1:74703, y3+1:94182, y4+1:257686, y5+1:406030, y6+1:133517, y7+2:213920, y8+1:2477306, y9+1:688788, y10+1:51889, y11+1:62642, y11+1:70437, y12+1:50426];[b3+1:91832, b4+1:87987, b5+1:86672, b6+1:112891, b7+1:198521, b8+1:291194, b8+1:466287, b9+1:425255, b9+1:530690, b11+1:48012, b11+1:71494, b12+1:43282, b12+1:82796, b13+1:55554, b15+1:45033];[M16+2:992391, M16+2:1937402]}{24331@[b2+1:…	{24327@29}{24331@3}{24332@3}		ApoA1	141	QKVAPLGEEFR	QKVAPLGEEFR(2)	1272.68	13.1165	{24327@[y2+1, y3+1, y5+1, y6+1, y7+2, y8+2, y9+1];[b3+1, b3+1, b4+1, b4+1];[M11+2, M11+2]}{24329@[y8+1, y9+1]}{24330@[y9+1]}	{24327@[y2+1:322.18797, y3+1:451.23074, y5+1:637.29548, y6+1:750.37961, y7+2:424.21983, y8+2:459.73835, y9+1:1017.53675];[b3+1:410.24053, b3+1:442.21241, b4+1:481.27819, b4+1:513.24980];[M11+2:664.35537, M11+2:680.34121]}{24329@[y8+1:918.46688, y9+1:1017.53373]}{24330@[y9+1:1017.53363]}	{24327@[y2+1:0.00061, y3+1:0.00078, y5+1:0.00146, y6+1:0.00153, y7+2:0.00154, y8+2:0.00148, y9+1:0.00038];[b3+1:0.00074, b3+1:0.00054, b4+1:0.00128, b4+1:0.00082];[M11+2:0.00299, M11+2:0.00259]}{24329@[y8+1:-0.00108, y9+1:-0.00264]}{24330@[y9+1:-0.00274]}	{24327@[y2+1:1.89, y3+1:1.74, y5+1:2.30, y6+1:2.04, y7+2:1.82, y8+2:1.61, y9+1:0.37];[b3+1:1.80, b3+1:1.23, b4+1:2.67, b4+1:1.59];[M11+2:2.25, M11+2:1.91]}{24329@[y8+1:-1.17, y9+1:-2.60]}{24330@[y9+1:-2.70]}	{24327@[y2+1:61752, y3+1:74681, y5+1:304210, y6+1:89255, y7+2:144435, y8+2:114639, y9+1:681984];[b3+1:85113, b3+1:55952, b4+1:71856, b4+1:57577];[M11+2:3276994, M11+2:1430897]}{24329@[y8+1:10796, y9+1:10986]}{24330@[y9+1:1453]}	{24327@13}{24329@2}{24330@1}		42.2998	158.003	7	2;2	4	2	1
ApoA1	ApoA1	141	163	ApoA1ApoA1141163	K	K	3	W:\Collaboration_Services\Raw_files_FPL\Fusion Lumos\2021\Zheng\20211204_ZS_WP_SV_ns1_xlms\2021-12-04-10-10-24\Task1-Calibrate\20211203_ZS_WP_SV_ns1_R3-calib.mzML	25550	25486	933.228	4	3728.88	Intra	K;K		ApoA1	163	QKVQELQDKLSPLAQELR	QK[DSSO:DSSO_hydro_K on K]VQELQDKLSPLAQELR(9)	2298.19	7.13011	[y2+1, y4+1, y5+1, y7+1, y8+1, y9+1];[M18+2]	[y2+1:288.20318, y4+1:545.30501, y5+1:616.34237, y7+1:826.47640, y8+1:913.50659, y9+1:1026.59209];[M18+2:1193.08721]	[y2+1:0.00016, y4+1:0.00082, y5+1:0.00107, y7+1:-0.00173, y8+1:-0.00357, y9+1:-0.00213];[M18+2:-0.01169]	[y2+1:0.57, y4+1:1.51, y5+1:1.75, y7+1:-2.09, y8+1:-3.91, y9+1:-2.07];[M18+2:-4.91]	[y2+1:5011, y4+1:10747, y5+1:8045, y7+1:67317, y8+1:75760, y9+1:22342];[M18+2:8401]	7		ApoA1	141	QKVAPLGEEFR	QKVAPLGEEFR(2)	1272.68	5.09856	{25550@[y7+1, y8+1];[M11+2, M11+2];[b8+1]}{25553@[y9+1]}{25554@[y9+1]}	{25550@[y7+1:847.43031, y8+1:918.46478];[M11+2:664.35254, M11+2:680.33888];[b8+1:909.45272]}{25553@[y9+1:1017.53297]}{25554@[y9+1:1017.53430]}	{25550@[y7+1:-0.00053, y8+1:-0.00317];[M11+2:-0.00268, M11+2:-0.00207];[b8+1:0.00286]}{25553@[y9+1:-0.00340]}{25554@[y9+1:-0.00207]}	{25550@[y7+1:-0.63, y8+1:-3.46];[M11+2:-2.02, M11+2:-1.52];[b8+1:3.14]}{25553@[y9+1:-3.34]}{25554@[y9+1:-2.03]}	{25550@[y7+1:34712, y8+1:18920];[M11+2:59639, M11+2:28461];[b8+1:7970]}{25553@[y9+1:95]}{25554@[y9+1:27]}	{25550@5}{25553@1}{25554@1}		12.2287	158.01	57	1;2	3	1	15
ApoA1	ApoA1	141	259	ApoA1ApoA1141259	S	K	1	W:\Collaboration_Services\Raw_files_FPL\Fusion Lumos\2021\Zheng\20211204_ZS_WP_SV_ns1_xlms\2021-12-04-10-10-24\Task1-Calibrate\20211203_ZS_WP_SV_ns1_R1-calib.mzML	24296	24249	694.62	4	2774.45	Intra	S;K		ApoA1	259	VSILAAIDEASKK	VSILAAIDEASKK(11)	1343.77	6.01926	[b4+1, b5+1, b6+1, b10+1];[y7+1, y8+1]	[b4+1:413.27532, b5+1:484.31182, b6+1:555.35178, b10+1:983.54315];[y7+1:876.41077, y8+1:915.47769]	[b4+1:-0.00053, b5+1:-0.00114, b6+1:0.00170, b10+1:0.00236];[y7+1:-0.00238, y8+1:-0.00050]	[b4+1:-1.28, b5+1:-2.35, b6+1:3.07, b10+1:2.40];[y7+1:-2.72, y8+1:-0.54]	[b4+1:5816, b5+1:4684, b6+1:5051, b10+1:5059];[y7+1:6135, y8+1:4803]	6		ApoA1	141	QKVAPLGEEFR	QKVAPLGEEFR(2)	1272.68	4.03594	[y7+1, y9+1];[M11+2];[b10+1]	[y7+1:847.42797, y9+1:1017.53731];[M11+2:664.35287];[b10+1:1185.55845]	[y7+1:-0.00287, y9+1:0.00093];[M11+2:-0.00202];[b10+1:-0.00243]	[y7+1:-3.40, y9+1:0.92];[M11+2:-1.52];[b10+1:-2.05]	[y7+1:10492, y9+1:3942];[M11+2:39528];[b10+1:4894]	4		10.0552	158.004	30	0;1	1	-	119
ApoA1	ApoA1	141	259	ApoA1ApoA1141259	S	K	2	W:\Collaboration_Services\Raw_files_FPL\Fusion Lumos\2021\Zheng\20211204_ZS_WP_SV_ns1_xlms\2021-12-04-10-10-24\Task1-Calibrate\20211203_ZS_WP_SV_ns1_R2-calib.mzML	24127	24093	694.621	4	2774.45	Intra	S;K		ApoA1	259	VSILAAIDEASKK	VSILAAIDEASKK(11)	1343.77	11.0627	[b4+1, b5+1, b6+1, b10+1];[y8+1, y8+1, y9+1, y9+1, y10+1, y10+1];[M13+2]	[b4+1:413.27571, b5+1:484.31299, b6+1:555.34920, b10+1:983.54449];[y8+1:915.47789, y8+1:947.44607, y9+1:986.51501, y9+1:1018.48124, y10+1:1099.59514, y10+1:1131.57315];[M13+2:715.87824]	[b4+1:-0.00013, b5+1:0.00003, b6+1:-0.00087, b10+1:0.00371];[y8+1:-0.00030, y8+1:-0.00420, y9+1:-0.00028, y9+1:-0.00614, y10+1:-0.00422, y10+1:0.00171];[M13+2:-0.00674]	[b4+1:-0.32, b5+1:0.07, b6+1:-1.57, b10+1:3.77];[y8+1:-0.32, y8+1:-4.43, y9+1:-0.29, y9+1:-6.03, y10+1:-3.84, y10+1:1.51];[M13+2:-4.72]	[b4+1:16733, b5+1:10992, b6+1:17629, b10+1:9589];[y8+1:16237, y8+1:14175, y9+1:13208, y9+1:14906, y10+1:12056, y10+1:10899];[M13+2:30678]	11		ApoA1	141	QKVAPLGEEFR	QKVAPLGEEFR(2)	1272.68	5.10453	{24127@[y7+1, y8+1, y9+1];[M11+2, M11+2]}{24129@[y9+1]}{24130@[y9+1]}	{24127@[y7+1:847.42788, y8+1:918.46320, y9+1:1017.53715];[M11+2:664.35311, M11+2:680.33968]}{24129@[y9+1:1017.53129]}{24130@[y9+1:1017.53263]}	{24127@[y7+1:-0.00296, y8+1:-0.00476, y9+1:0.00078];[M11+2:-0.00154, M11+2:-0.00046]}{24129@[y9+1:-0.00508]}{24130@[y9+1:-0.00374]}	{24127@[y7+1:-3.50, y8+1:-5.19, y9+1:0.76];[M11+2:-1.16, M11+2:-0.34]}{24129@[y9+1:-4.99]}{24130@[y9+1:-3.68]}	{24127@[y7+1:31001, y8+1:14209, y9+1:10883];[M11+2:170616, M11+2:51752]}{24129@[y9+1:311]}{24130@[y9+1:467]}	{24127@5}{24129@1}{24130@1}		16.1673	158.005	25	1;2	3	67	7
ApoA1	ApoA1	141	261	ApoA1ApoA1141261	K	K	1	W:\Collaboration_Services\Raw_files_FPL\Fusion Lumos\2021\Zheng\20211204_ZS_WP_SV_ns1_xlms\2021-12-04-10-10-24\Task1-Calibrate\20211203_ZS_WP_SV_ns1_R1-calib.mzML	14752	14733	668.679	3	2003.02	Intra	K;K		ApoA1	141	QKVAPLGEEFR	QKVAPLGEEFR(2)	1272.68	16.1529	{14752@[b2+1, b2+1, b3+1, b3+1, b4+1, b4+1, b10+2];[y2+1, y3+1, y5+1, y6+1, y7+1, y8+1, y9+1];[M11+1, M11+2]}{14756@[y9+1]}{14757@}	{14752@[b2+1:311.17143, b2+1:343.14324, b3+1:410.23933, b3+1:442.21160, b4+1:481.27562, b4+1:513.24881, b10+2:593.28576];[y2+1:322.18720, y3+1:451.22911, y5+1:637.29343, y6+1:750.38349, y7+1:847.42845, y8+1:918.46634, y9+1:1017.53474];[M11+1:1327.69566, M11+2:680.33912]}{14756@[y9+1:1017.53122]}{14757@}	{14752@[b2+1:0.00005, b2+1:-0.00022, b3+1:-0.00046, b3+1:-0.00027, b4+1:-0.00128, b4+1:-0.00017, b10+2:0.00337];[y2+1:-0.00017, y3+1:-0.00085, y5+1:-0.00059, y6+1:0.00541, y7+1:-0.00240, y8+1:-0.00161, y9+1:-0.00163];[M11+1:-0.00482, M11+2:-0.00159]}{14756@[y9+1:-0.00516]}{14757@}	{14752@[b2+1:0.17, b2+1:-0.63, b3+1:-1.13, b3+1:-0.62, b4+1:-2.68, b4+1:-0.33, b10+2:2.85];[y2+1:-0.51, y3+1:-1.89, y5+1:-0.92, y6+1:7.22, y7+1:-2.83, y8+1:-1.76, y9+1:-1.61];[M11+1:-3.63, M11+2:-1.17]}{14756@[y9+1:-5.07]}{14757@}	{14752@[b2+1:6211, b2+1:4502, b3+1:33911, b3+1:29962, b4+1:46905, b4+1:54548, b10+2:4650];[y2+1:14611, y3+1:12119, y5+1:54887, y6+1:7843, y7+1:231280, y8+1:93631, y9+1:53356];[M11+1:49987, M11+2:172208]}{14756@[y9+1:122]}{14757@}	{14752@16}{14756@1}{14757@0}		ApoA1	261	KLNAQ	KLNAQ(1)	572.328	6.06785	[b2+1, b2+1];[y2+1, y3+1];[M5+1, M5+1]	[b2+1:296.19735, b2+1:328.16760];[y2+1:218.11313, y3+1:332.15634];[M5+1:627.34530, M5+1:659.31621]	[b2+1:0.00049, b2+1:-0.00134];[y2+1:-0.00041, y3+1:-0.00012];[M5+1:-0.00075, M5+1:-0.00192]	[b2+1:1.65, b2+1:-4.09];[y2+1:-1.87, y3+1:-0.36];[M5+1:-1.19, M5+1:-2.91]	[b2+1:6190, b2+1:5710];[y2+1:15165, y3+1:19975];[M5+1:164645, M5+1:174753]	6		22.2207	158.004	1	2;2	4	56	68
ApoA1	ApoA1	141	261	ApoA1ApoA1141261	K	K	2	W:\Collaboration_Services\Raw_files_FPL\Fusion Lumos\2021\Zheng\20211204_ZS_WP_SV_ns1_xlms\2021-12-04-10-10-24\Task1-Calibrate\20211203_ZS_WP_SV_ns1_R2-calib.mzML	14969	14936	668.678	3	2003.01	Intra	K;K		ApoA1	141	QKVAPLGEEFR	QKVAPLGEEFR(2)	1272.68	15.1622	{14969@[y2+1, y3+1, y5+1, y7+1, y8+1, y9+1];[b2+1, b3+1, b3+1, b4+1, b4+1, b10+2, b10+2];[M11+1, M11+2]}{14973@[y9+1]}{14974@}	{14969@[y2+1:322.18806, y3+1:451.23022, y5+1:637.29254, y7+1:847.43054, y8+1:918.46775, y9+1:1017.53697];[b2+1:343.14444, b3+1:410.24031, b3+1:442.21233, b4+1:481.27713, b4+1:513.24810, b10+2:577.29955, b10+2:593.28749];[M11+1:1327.69855, M11+2:680.33954]}{14973@[y9+1:1017.53439]}{14974@}	{14969@[y2+1:0.00069, y3+1:0.00026, y5+1:-0.00148, y7+1:-0.00031, y8+1:-0.00021, y9+1:0.00060];[b2+1:0.00099, b3+1:0.00052, b3+1:0.00046, b4+1:0.00022, b4+1:-0.00088, b10+2:0.00303, b10+2:0.00682];[M11+1:-0.00192, M11+2:-0.00075]}{14973@[y9+1:-0.00199]}{14974@}	{14969@[y2+1:2.16, y3+1:0.58, y5+1:-2.32, y7+1:-0.36, y8+1:-0.23, y9+1:0.59];[b2+1:2.88, b3+1:1.27, b3+1:1.04, b4+1:0.47, b4+1:-1.73, b10+2:2.63, b10+2:5.76];[M11+1:-1.45, M11+2:-0.56]}{14973@[y9+1:-1.95]}{14974@}	{14969@[y2+1:10743, y3+1:9846, y5+1:36613, y7+1:219702, y8+1:86336, y9+1:46567];[b2+1:5742, b3+1:23351, b3+1:27387, b4+1:45218, b4+1:52351, b10+2:14342, b10+2:8563];[M11+1:40978, M11+2:192511]}{14973@[y9+1:142]}{14974@}	{14969@15}{14973@1}{14974@0}		ApoA1	261	KLNAQ	KLNAQ(1)	572.328	4.06037	[y2+1, y3+1];[M5+1, M5+1]	[y2+1:218.11348, y3+1:332.15810];[M5+1:627.34617, M5+1:659.31724]	[y2+1:-0.00005, y3+1:0.00164];[M5+1:0.00013, M5+1:-0.00089]	[y2+1:-0.22, y3+1:4.96];[M5+1:0.20, M5+1:-1.35]	[y2+1:10053, y3+1:9347];[M5+1:137653, M5+1:148326]	4		19.2225	158.001	1	2;2	4	45	8
ApoA1	ApoA1	141	261	ApoA1ApoA1141261	K	K	3	W:\Collaboration_Services\Raw_files_FPL\Fusion Lumos\2021\Zheng\20211204_ZS_WP_SV_ns1_xlms\2021-12-04-10-10-24\Task1-Calibrate\20211203_ZS_WP_SV_ns1_R3-calib.mzML	14379	14340	668.679	3	2003.02	Intra	K;K		ApoA1	141	QKVAPLGEEFR	QKVAPLGEEFR(2)	1272.68	12.1605	{14379@[y2+1, y3+1, y5+1, y7+1, y8+1, y9+1];[b3+1, b3+1, b4+1, b4+1];[M11+1, M11+2]}{14382@}{14383@}	{14379@[y2+1:322.18832, y3+1:451.23227, y5+1:637.29466, y7+1:847.43194, y8+1:918.46965, y9+1:1017.53973];[b3+1:410.24051, b3+1:442.21318, b4+1:481.27763, b4+1:513.24975];[M11+1:1327.69857, M11+2:680.34062]}{14382@}{14383@}	{14379@[y2+1:0.00096, y3+1:0.00231, y5+1:0.00065, y7+1:0.00110, y8+1:0.00169, y9+1:0.00336];[b3+1:0.00072, b3+1:0.00131, b4+1:0.00072, b4+1:0.00076];[M11+1:-0.00190, M11+2:0.00142]}{14382@}{14383@}	{14379@[y2+1:2.98, y3+1:5.13, y5+1:1.02, y7+1:1.30, y8+1:1.84, y9+1:3.31];[b3+1:1.76, b3+1:2.97, b4+1:1.51, b4+1:1.49];[M11+1:-1.43, M11+2:1.04]}{14382@}{14383@}	{14379@[y2+1:9484, y3+1:7253, y5+1:26701, y7+1:154549, y8+1:64069, y9+1:35058];[b3+1:22576, b3+1:13878, b4+1:26251, b4+1:42552];[M11+1:24896, M11+2:139239]}{14382@}{14383@}	{14379@12}{14382@0}{14383@0}		ApoA1	261	KLNAQ	KLNAQ(1)	572.328	4.0829	[y2+1, y3+1];[M5+1, M5+1]	[y2+1:218.11402, y3+1:332.15574];[M5+1:627.34700, M5+1:659.31778]	[y2+1:0.00048, y3+1:-0.00072];[M5+1:0.00095, M5+1:-0.00034]	[y2+1:2.23, y3+1:-2.16];[M5+1:1.52, M5+1:-0.52]	[y2+1:5520, y3+1:9063];[M5+1:138021, M5+1:140052]	4		16.2434	158.005	1	2;2	4	3	5
ApoA1	ApoA1	156	156	ApoA1ApoA1156156	K	K	1	W:\Collaboration_Services\Raw_files_FPL\Fusion Lumos\2021\Zheng\20211204_ZS_WP_SV_ns1_xlms\2021-12-04-10-10-24\Task1-Calibrate\20211203_ZS_WP_SV_ns1_R1-calib.mzML	8819	8817	597.807	4	2387.2	Intra	K;K		ApoA1	156	QKVQELQDK	QKVQELQDK(2)	1114.6	11.322	[b2+1, b2+1, b3+1];[y2+1, y3+1, y4+1, y5+1, y6+1, y7+1];[M9+2, M9+2]	[b2+1:311.17110, b2+1:343.14292, b3+1:442.21089];[y2+1:262.13913, y3+1:390.19772, y4+1:503.28216, y5+1:632.32454, y6+1:760.38313, y7+1:859.45151];[M9+2:585.31143, M9+2:601.29775]	[b2+1:-0.00028, b2+1:-0.00053, b3+1:-0.00098];[y2+1:-0.00062, y3+1:-0.00060, y4+1:-0.00023, y5+1:-0.00044, y6+1:-0.00043, y7+1:-0.00047];[M9+2:-0.00050, M9+2:0.00008]	[b2+1:-0.89, b2+1:-1.56, b3+1:-2.21];[y2+1:-2.37, y3+1:-1.55, y4+1:-0.46, y5+1:-0.69, y6+1:-0.57, y7+1:-0.54];[M9+2:-0.43, M9+2:0.06]	[b2+1:12067, b2+1:12715, b3+1:15959];[y2+1:40269, y3+1:54004, y4+1:120186, y5+1:149017, y6+1:213417, y7+1:178015];[M9+2:857435, M9+2:22030]	11		ApoA1	156	QKVQELQDK	QKVQELQDK(2)	1114.6	11.322	[b2+1, b2+1, b3+1];[y2+1, y3+1, y4+1, y5+1, y6+1, y7+1];[M9+2, M9+2]	[b2+1:311.17110, b2+1:343.14292, b3+1:442.21089];[y2+1:262.13913, y3+1:390.19772, y4+1:503.28216, y5+1:632.32454, y6+1:760.38313, y7+1:859.45151];[M9+2:585.31143, M9+2:601.29775]	[b2+1:-0.00028, b2+1:-0.00053, b3+1:-0.00098];[y2+1:-0.00062, y3+1:-0.00060, y4+1:-0.00023, y5+1:-0.00044, y6+1:-0.00043, y7+1:-0.00047];[M9+2:-0.00050, M9+2:0.00008]	[b2+1:-0.89, b2+1:-1.56, b3+1:-2.21];[y2+1:-2.37, y3+1:-1.55, y4+1:-0.46, y5+1:-0.69, y6+1:-0.57, y7+1:-0.54];[M9+2:-0.43, M9+2:0.06]	[b2+1:12067, b2+1:12715, b3+1:15959];[y2+1:40269, y3+1:54004, y4+1:120186, y5+1:149017, y6+1:213417, y7+1:178015];[M9+2:857435, M9+2:22030]	11		22.644	158.003	18	2;2	4	10	10
ApoA1	ApoA1	156	156	ApoA1ApoA1156156	K	K	1	W:\Collaboration_Services\Raw_files_FPL\Fusion Lumos\2021\Zheng\20211204_ZS_WP_SV_ns1_xlms\2021-12-04-10-10-24\Task1-Calibrate\20211203_ZS_WP_SV_ns1_R1-calib.mzML	8826	8824	796.741	3	2387.2	Intra	K;K		ApoA1	156	QKVQELQDK	QKVQELQDK(2)	1114.6	9.10984	{8826@[y2+1, y3+1, y4+1, y5+1, y6+1, y7+1];[b3+1];[M9+1, M9+1]}{8827@[y3+1]}{8829@}{8830@}	{8826@[y2+1:262.13889, y3+1:390.19843, y4+1:503.28086, y5+1:632.32476, y6+1:760.38251, y7+1:859.45152];[b3+1:410.23993];[M9+1:1169.61576, M9+1:1201.58774]}{8827@[y3+1:390.19992]}{8829@}{8830@}	{8826@[y2+1:-0.00086, y3+1:0.00010, y4+1:-0.00152, y5+1:-0.00022, y6+1:-0.00104, y7+1:-0.00045];[b3+1:0.00014];[M9+1:-0.00031, M9+1:-0.00042]}{8827@[y3+1:0.00160]}{8829@}{8830@}	{8826@[y2+1:-3.30, y3+1:0.26, y4+1:-3.03, y5+1:-0.35, y6+1:-1.38, y7+1:-0.52];[b3+1:0.33];[M9+1:-0.27, M9+1:-0.35]}{8827@[y3+1:4.11]}{8829@}{8830@}	{8826@[y2+1:3483, y3+1:9918, y4+1:13724, y5+1:19993, y6+1:26525, y7+1:22050];[b3+1:3198];[M9+1:82168, M9+1:81564]}{8827@[y3+1:113]}{8829@}{8830@}	{8826@9}{8827@1}{8829@0}{8830@0}		ApoA1	156	QKVQELQDK	QKVQELQDK(2)	1114.6	9.10984	{8826@[y2+1, y3+1, y4+1, y5+1, y6+1, y7+1];[b3+1];[M9+1, M9+1]}{8827@[y3+1]}{8829@}{8830@}	{8826@[y2+1:262.13889, y3+1:390.19843, y4+1:503.28086, y5+1:632.32476, y6+1:760.38251, y7+1:859.45152];[b3+1:410.23993];[M9+1:1169.61576, M9+1:1201.58774]}{8827@[y3+1:390.19992]}{8829@}{8830@}	{8826@[y2+1:-0.00086, y3+1:0.00010, y4+1:-0.00152, y5+1:-0.00022, y6+1:-0.00104, y7+1:-0.00045];[b3+1:0.00014];[M9+1:-0.00031, M9+1:-0.00042]}{8827@[y3+1:0.00160]}{8829@}{8830@}	{8826@[y2+1:-3.30, y3+1:0.26, y4+1:-3.03, y5+1:-0.35, y6+1:-1.38, y7+1:-0.52];[b3+1:0.33];[M9+1:-0.27, M9+1:-0.35]}{8827@[y3+1:4.11]}{8829@}{8830@}	{8826@[y2+1:3483, y3+1:9918, y4+1:13724, y5+1:19993, y6+1:26525, y7+1:22050];[b3+1:3198];[M9+1:82168, M9+1:81564]}{8827@[y3+1:113]}{8829@}{8830@}	{8826@9}{8827@1}{8829@0}{8830@0}		18.2197	158.005	6	2;2	4	5	5
ApoA1	ApoA1	156	156	ApoA1ApoA1156156	K	K	2	W:\Collaboration_Services\Raw_files_FPL\Fusion Lumos\2021\Zheng\20211204_ZS_WP_SV_ns1_xlms\2021-12-04-10-10-24\Task1-Calibrate\20211203_ZS_WP_SV_ns1_R2-calib.mzML	8915	8913	597.806	4	2387.19	Intra	K;K		ApoA1	156	QKVQELQDK	QKVQELQDK(2)	1114.6	12.2461	[b2+1, b2+1, b3+1, b6+1];[y2+1, y3+1, y4+1, y5+1, y6+1, y7+1];[M9+2, M9+2]	[b2+1:311.17128, b2+1:343.14284, b3+1:442.21218, b6+1:812.40103];[y2+1:262.13991, y3+1:390.19934, y4+1:503.28274, y5+1:632.32610, y6+1:760.38289, y7+1:859.45107];[M9+2:585.31175, M9+2:601.29783]	[b2+1:-0.00010, b2+1:-0.00062, b3+1:0.00031, b6+1:0.00393];[y2+1:0.00017, y3+1:0.00102, y4+1:0.00036, y5+1:0.00112, y6+1:-0.00067, y7+1:-0.00090];[M9+2:0.00014, M9+2:0.00024]	[b2+1:-0.33, b2+1:-1.82, b3+1:0.70, b6+1:4.84];[y2+1:0.64, y3+1:2.61, y4+1:0.71, y5+1:1.77, y6+1:-0.89, y7+1:-1.05];[M9+2:0.12, M9+2:0.20]	[b2+1:4443, b2+1:7748, b3+1:7809, b6+1:3615];[y2+1:14445, y3+1:22417, y4+1:43087, y5+1:58478, y6+1:84401, y7+1:61241];[M9+2:328003, M9+2:17928]	12		ApoA1	156	QKVQELQDK	QKVQELQDK(2)	1114.6	12.2461	[b2+1, b2+1, b3+1, b6+1];[y2+1, y3+1, y4+1, y5+1, y6+1, y7+1];[M9+2, M9+2]	[b2+1:311.17128, b2+1:343.14284, b3+1:442.21218, b6+1:812.40103];[y2+1:262.13991, y3+1:390.19934, y4+1:503.28274, y5+1:632.32610, y6+1:760.38289, y7+1:859.45107];[M9+2:585.31175, M9+2:601.29783]	[b2+1:-0.00010, b2+1:-0.00062, b3+1:0.00031, b6+1:0.00393];[y2+1:0.00017, y3+1:0.00102, y4+1:0.00036, y5+1:0.00112, y6+1:-0.00067, y7+1:-0.00090];[M9+2:0.00014, M9+2:0.00024]	[b2+1:-0.33, b2+1:-1.82, b3+1:0.70, b6+1:4.84];[y2+1:0.64, y3+1:2.61, y4+1:0.71, y5+1:1.77, y6+1:-0.89, y7+1:-1.05];[M9+2:0.12, M9+2:0.20]	[b2+1:4443, b2+1:7748, b3+1:7809, b6+1:3615];[y2+1:14445, y3+1:22417, y4+1:43087, y5+1:58478, y6+1:84401, y7+1:61241];[M9+2:328003, M9+2:17928]	12		24.4922	157.998	18	2;2	4	1	1
ApoA1	ApoA1	156	156	ApoA1ApoA1156156	K	K	2	W:\Collaboration_Services\Raw_files_FPL\Fusion Lumos\2021\Zheng\20211204_ZS_WP_SV_ns1_xlms\2021-12-04-10-10-24\Task1-Calibrate\20211203_ZS_WP_SV_ns1_R2-calib.mzML	8927	8925	796.742	3	2387.2	Intra	K;K		ApoA1	156	QKVQELQDK	QKVQELQDK(2)	1114.6	6.07191	{8927@[y4+1, y5+1, y6+1, y7+1];[M9+1, M9+1]}{8928@[y3+1]}	{8927@[y4+1:503.28078, y5+1:632.32421, y6+1:760.37914, y7+1:859.45205];[M9+1:1169.61540, M9+1:1201.58794]}{8928@[y3+1:390.20038]}	{8927@[y4+1:-0.00161, y5+1:-0.00077, y6+1:-0.00442, y7+1:0.00008];[M9+1:-0.00068, M9+1:-0.00022]}{8928@[y3+1:0.00206]}	{8927@[y4+1:-3.20, y5+1:-1.22, y6+1:-5.82, y7+1:0.09];[M9+1:-0.58, M9+1:-0.18]}{8928@[y3+1:5.29]}	{8927@[y4+1:3006, y5+1:6015, y6+1:3877, y7+1:5936];[M9+1:14532, M9+1:15296]}{8928@[y3+1:56]}	{8927@6}{8928@1}		ApoA1	156	QKVQELQDK	QKVQELQDK(2)	1114.6	6.07191	{8927@[y4+1, y5+1, y6+1, y7+1];[M9+1, M9+1]}{8928@[y3+1]}	{8927@[y4+1:503.28078, y5+1:632.32421, y6+1:760.37914, y7+1:859.45205];[M9+1:1169.61540, M9+1:1201.58794]}{8928@[y3+1:390.20038]}	{8927@[y4+1:-0.00161, y5+1:-0.00077, y6+1:-0.00442, y7+1:0.00008];[M9+1:-0.00068, M9+1:-0.00022]}{8928@[y3+1:0.00206]}	{8927@[y4+1:-3.20, y5+1:-1.22, y6+1:-5.82, y7+1:0.09];[M9+1:-0.58, M9+1:-0.18]}{8928@[y3+1:5.29]}	{8927@[y4+1:3006, y5+1:6015, y6+1:3877, y7+1:5936];[M9+1:14532, M9+1:15296]}{8928@[y3+1:56]}	{8927@6}{8928@1}		12.1438	158.007	4	2;2	4	10	10
ApoA1	ApoA1	156	156	ApoA1ApoA1156156	K	K	3	W:\Collaboration_Services\Raw_files_FPL\Fusion Lumos\2021\Zheng\20211204_ZS_WP_SV_ns1_xlms\2021-12-04-10-10-24\Task1-Calibrate\20211203_ZS_WP_SV_ns1_R3-calib.mzML	8637	8633	597.808	4	2387.2	Intra	K;K		ApoA1	156	QKVQELQDK	QKVQELQDK(2)	1114.6	12.2668	[b2+1, b2+1, b3+1, b3+1];[y2+1, y3+1, y4+1, y5+1, y6+1, y7+1];[M9+2, M9+2]	[b2+1:311.17186, b2+1:343.14394, b3+1:410.23963, b3+1:442.21265];[y2+1:262.13997, y3+1:390.19874, y4+1:503.28260, y5+1:632.32499, y6+1:760.38330, y7+1:859.45128];[M9+2:585.31189, M9+2:601.29808]	[b2+1:0.00048, b2+1:0.00048, b3+1:-0.00017, b3+1:0.00078];[y2+1:0.00023, y3+1:0.00042, y4+1:0.00021, y5+1:0.00001, y6+1:-0.00026, y7+1:-0.00069];[M9+2:0.00042, M9+2:0.00073]	[b2+1:1.55, b2+1:1.41, b3+1:-0.40, b3+1:1.77];[y2+1:0.86, y3+1:1.07, y4+1:0.42, y5+1:0.01, y6+1:-0.34, y7+1:-0.81];[M9+2:0.36, M9+2:0.61]	[b2+1:7750, b2+1:11263, b3+1:5438, b3+1:11640];[y2+1:31092, y3+1:42378, y4+1:77774, y5+1:103556, y6+1:144204, y7+1:116897];[M9+2:525103, M9+2:18245]	12		ApoA1	156	QKVQELQDK	QKVQELQDK(2)	1114.6	12.2668	[b2+1, b2+1, b3+1, b3+1];[y2+1, y3+1, y4+1, y5+1, y6+1, y7+1];[M9+2, M9+2]	[b2+1:311.17186, b2+1:343.14394, b3+1:410.23963, b3+1:442.21265];[y2+1:262.13997, y3+1:390.19874, y4+1:503.28260, y5+1:632.32499, y6+1:760.38330, y7+1:859.45128];[M9+2:585.31189, M9+2:601.29808]	[b2+1:0.00048, b2+1:0.00048, b3+1:-0.00017, b3+1:0.00078];[y2+1:0.00023, y3+1:0.00042, y4+1:0.00021, y5+1:0.00001, y6+1:-0.00026, y7+1:-0.00069];[M9+2:0.00042, M9+2:0.00073]	[b2+1:1.55, b2+1:1.41, b3+1:-0.40, b3+1:1.77];[y2+1:0.86, y3+1:1.07, y4+1:0.42, y5+1:0.01, y6+1:-0.34, y7+1:-0.81];[M9+2:0.36, M9+2:0.61]	[b2+1:7750, b2+1:11263, b3+1:5438, b3+1:11640];[y2+1:31092, y3+1:42378, y4+1:77774, y5+1:103556, y6+1:144204, y7+1:116897];[M9+2:525103, M9+2:18245]	12		24.5336	158.007	9	2;2	4	1	1
ApoA1	ApoA1	156	156	ApoA1ApoA1156156	K	K	3	W:\Collaboration_Services\Raw_files_FPL\Fusion Lumos\2021\Zheng\20211204_ZS_WP_SV_ns1_xlms\2021-12-04-10-10-24\Task1-Calibrate\20211203_ZS_WP_SV_ns1_R3-calib.mzML	8638	8633	796.742	3	2387.2	Intra	K;K		ApoA1	156	QKVQELQDK	QKVQELQDK(2)	1114.6	5.22972	{8638@[y4+1, y5+1, y7+1];[M9+2, M9+2]}{8643@[y3+1]}{8644@[y3+1]}	{8638@[y4+1:503.28380, y5+1:632.32108, y7+1:859.45177];[M9+2:585.31146, M9+2:601.29765]}{8643@[y3+1:390.20045]}{8644@[y3+1:390.20045]}	{8638@[y4+1:0.00141, y5+1:-0.00390, y7+1:-0.00021];[M9+2:-0.00044, M9+2:-0.00013]}{8643@[y3+1:0.00213]}{8644@[y3+1:0.00213]}	{8638@[y4+1:2.80, y5+1:-6.18, y7+1:-0.24];[M9+2:-0.38, M9+2:-0.10]}{8643@[y3+1:5.46]}{8644@[y3+1:5.46]}	{8638@[y4+1:3735, y5+1:4593, y7+1:5467];[M9+2:45690, M9+2:20347]}{8643@[y3+1:20]}{8644@[y3+1:17]}	{8638@5}{8643@1}{8644@1}		ApoA1	156	QKVQELQDK	QKVQELQDK(2)	1114.6	5.22972	{8638@[y4+1, y5+1, y7+1];[M9+2, M9+2]}{8643@[y3+1]}{8644@[y3+1]}	{8638@[y4+1:503.28380, y5+1:632.32108, y7+1:859.45177];[M9+2:585.31146, M9+2:601.29765]}{8643@[y3+1:390.20045]}{8644@[y3+1:390.20045]}	{8638@[y4+1:0.00141, y5+1:-0.00390, y7+1:-0.00021];[M9+2:-0.00044, M9+2:-0.00013]}{8643@[y3+1:0.00213]}{8644@[y3+1:0.00213]}	{8638@[y4+1:2.80, y5+1:-6.18, y7+1:-0.24];[M9+2:-0.38, M9+2:-0.10]}{8643@[y3+1:5.46]}{8644@[y3+1:5.46]}	{8638@[y4+1:3735, y5+1:4593, y7+1:5467];[M9+2:45690, M9+2:20347]}{8643@[y3+1:20]}{8644@[y3+1:17]}	{8638@5}{8643@1}{8644@1}		10.4594	158.007	3	2;2	4	8	8
ApoA1	ApoA1	156	163	ApoA1ApoA1156163	K	K	1	W:\Collaboration_Services\Raw_files_FPL\Fusion Lumos\2021\Zheng\20211204_ZS_WP_SV_ns1_xlms\2021-12-04-10-10-24\Task1-Calibrate\20211203_ZS_WP_SV_ns1_R1-calib.mzML	20967	20936	785.665	4	3138.63	Intra	K;K		ApoA1	163	VQELQDKLSPLAQELR	VQELQDKLSPLAQELR(7)	1866.02	15.1672	{20967@[y2+1, y4+1, y5+1, y7+2, y8+1, y9+1];[b4+1, b5+1, b7+1, b8+1, b8+1, b9+1, b9+1];[M16+2, M16+2]}{20972@[b2+1];[y10+1, y14+1]}{20973@[b2+1];[y9+1]}	{20967@[y2+1:288.20372, y4+1:545.30654, y5+1:616.34206, y7+2:413.74338, y8+1:913.51161, y9+1:1026.59604];[b4+1:470.26128, b5+1:598.31876, b7+1:927.42957, b8+1:1008.53670, b8+1:1040.50858, b9+1:1095.56662, b9+1:1127.54268];[M16+2:961.02358, M16+2:977.01048]}{20972@[b2+1:228.13391];[y10+1:1240.66981, y14+1:1725.87105]}{20973@[b2+1:228.13389];[y9+1:1026.60106]}	{20967@[y2+1:0.00071, y4+1:0.00235, y5+1:0.00076, y7+2:0.00135, y8+1:0.00146, y9+1:0.00182];[b4+1:0.00035, b5+1:-0.00075, b7+1:0.00552, b8+1:0.00067, b8+1:0.00047, b9+1:-0.00144, b9+1:0.00254];[M16+2:0.00098, M16+2:0.00270]}{20972@[b2+1:-0.00036];[y10+1:-0.00201, y14+1:-0.01296]}{20973@[b2+1:-0.00037];[y9+1:0.00684]}	{20967@[y2+1:2.46, y4+1:4.32, y5+1:1.23, y7+2:1.64, y8+1:1.60, y9+1:1.77];[b4+1:0.75, b5+1:-1.25, b7+1:5.96, b8+1:0.66, b8+1:0.45, b9+1:-1.32, b9+1:2.26];[M16+2:0.51, M16+2:1.38]}{20972@[b2+1:-1.59];[y10+1:-1.62, y14+1:-7.51]}{20973@[b2+1:-1.65];[y9+1:6.67]}	{20967@[y2+1:46412, y4+1:98153, y5+1:173816, y7+2:163197, y8+1:836583, y9+1:227839];[b4+1:37231, b5+1:57431, b7+1:69637, b8+1:125980, b8+1:112984, b9+1:155854, b9+1:181000];[M16+2:389029, M16+2:850617]}{20972@[b2+1:1312];[y10+1:304, y14+1:235]}{20973@[b2+1:301];[y9+1:1043]}	{20967@15}{20972@3}{20973@2}		ApoA1	156	QKVQELQDK	QKVQELQDK(2)	1114.6	7.14164	{20967@[y3+1, y4+1, y5+1, y6+1, y7+1];[M9+2, M9+2]}{20970@}{20971@}	{20967@[y3+1:390.19864, y4+1:503.28284, y5+1:632.32842, y6+1:760.38454, y7+1:859.45194];[M9+2:585.31274, M9+2:601.29871]}{20970@}{20971@}	{20967@[y3+1:0.00031, y4+1:0.00046, y5+1:0.00344, y6+1:0.00098, y7+1:-0.00003];[M9+2:0.00214, M9+2:0.00199]}{20970@}{20971@}	{20967@[y3+1:0.81, y4+1:0.91, y5+1:5.45, y6+1:1.29, y7+1:-0.04];[M9+2:1.83, M9+2:1.66]}{20970@}{20971@}	{20967@[y3+1:50934, y4+1:88533, y5+1:124162, y6+1:299567, y7+1:186227];[M9+2:1621204, M9+2:615701]}{20970@}{20971@}	{20967@7}{20970@0}{20971@0}		22.3089	158.01	3	2;2	4	3	2
ApoA1	ApoA1	156	163	ApoA1ApoA1156163	K	K	1	W:\Collaboration_Services\Raw_files_FPL\Fusion Lumos\2021\Zheng\20211204_ZS_WP_SV_ns1_xlms\2021-12-04-10-10-24\Task1-Calibrate\20211203_ZS_WP_SV_ns1_R1-calib.mzML	20969	20936	1047.22	3	3138.63	Intra	K;K		ApoA1	163	VQELQDKLSPLAQELR	VQELQDKLSPLAQELR(7)	1866.02	16.1891	{20969@[y4+1, y5+1, y7+1, y8+1, y9+1, y11+1, y12+1];[b5+1, b7+1, b7+1, b8+1, b9+1, b9+1, b12+1];[M16+1, M16+2]}{20978@[b2+1];[y11+1]}{20979@[b2+1];[y10+1]}{20980@[y10+1]}{20981@[b2+1, b8+1];[y9+1, y11+1]}	{20969@[y4+1:545.30507, y5+1:616.34266, y7+1:826.47881, y8+1:913.51015, y9+1:1026.59378, y11+1:1323.72352, y12+1:1451.78256];[b5+1:598.31973, b7+1:895.45530, b7+1:927.42938, b8+1:1008.53797, b9+1:1095.56350, b9+1:1127.54179, b12+1:1376.73891];[M16+1:1921.03779, M16+2:977.00921]}{20978@[b2+1:228.13389];[y11+1:1323.73654]}{20979@[b2+1:228.13390];[y10+1:1240.66979]}{20980@[y10+1:1240.66966]}{20981@[…	{20969@[y4+1:0.00089, y5+1:0.00136, y7+1:0.00068, y8+1:-0.00001, y9+1:-0.00045, y11+1:-0.00317, y12+1:-0.00271];[b5+1:0.00023, b7+1:0.00333, b7+1:0.00533, b8+1:0.00194, b9+1:-0.00456, b9+1:0.00165, b12+1:-0.00309];[M16+1:-0.00112, M16+2:0.00016]}{20978@[b2+1:-0.00038];[y11+1:0.00985]}{20979@[b2+1:-0.00037];[y10+1:-0.00203]}{20980@[y10+1:-0.00216]}{20981@[b2+1:-0.00038, b8+1:-0.00027];[y9+1:0.0068…	{20969@[y4+1:1.63, y5+1:2.22, y7+1:0.82, y8+1:-0.01, y9+1:-0.43, y11+1:-2.39, y12+1:-1.87];[b5+1:0.38, b7+1:3.72, b7+1:5.75, b8+1:1.92, b9+1:-4.17, b9+1:1.46, b12+1:-2.25];[M16+1:-0.58, M16+2:0.08]}{20978@[b2+1:-1.66];[y11+1:7.45]}{20979@[b2+1:-1.61];[y10+1:-1.64]}{20980@[y10+1:-1.74]}{20981@[b2+1:-1.67, b8+1:-0.26];[y9+1:6.65, y11+1:6.36]}	{20969@[y4+1:17942, y5+1:24378, y7+1:101567, y8+1:133262, y9+1:37455, y11+1:9737, y12+1:8113];[b5+1:10927, b7+1:12833, b7+1:9448, b8+1:31142, b9+1:25087, b9+1:20109, b12+1:10445];[M16+1:65555, M16+2:144999]}{20978@[b2+1:62];[y11+1:51]}{20979@[b2+1:133];[y10+1:98]}{20980@[y10+1:53]}{20981@[b2+1:110, b8+1:28];[y9+1:185, y11+1:114]}	{20969@16}{20978@2}{20979@2}{20980@1}{20981@4}		ApoA1	156	QKVQELQDK	QKVQELQDK(2)	1114.6	5.03479	[y3+1, y6+1, y7+1];[M9+2, M9+2]	[y3+1:390.19806, y6+1:760.38422, y7+1:859.45356];[M9+2:585.31238, M9+2:601.29902]	[y3+1:-0.00027, y6+1:0.00066, y7+1:0.00159];[M9+2:0.00141, M9+2:0.00262]	[y3+1:-0.69, y6+1:0.87, y7+1:1.85];[M9+2:1.21, M9+2:2.18]	[y3+1:6163, y6+1:18970, y7+1:21405];[M9+2:42965, M9+2:32487]	5		21.2239	158.01	32	2;2	4	2	14
ApoA1	ApoA1	156	163	ApoA1ApoA1156163	K	K	2	W:\Collaboration_Services\Raw_files_FPL\Fusion Lumos\2021\Zheng\20211204_ZS_WP_SV_ns1_xlms\2021-12-04-10-10-24\Task1-Calibrate\20211203_ZS_WP_SV_ns1_R2-calib.mzML	20945	20867	1047.22	3	3138.63	Intra	K;K		ApoA1	163	VQELQDKLSPLAQELR	VQELQDKLSPLAQELR(7)	1866.02	29.1774	{20945@[b3+1, b4+1, b5+1, b6+1, b7+1, b7+1, b8+1, b9+1, b9+1, b11+1, b12+1, b12+1, b15+1, b15+1];[y3+1, y4+1, y5+1, y7+1, y8+1, y9+1, y10+1, y10+1, y11+1, y11+1, y12+1, y12+1, y14+2];[M16+1, M16+2]}{20946@[b2+1];[y9+1, y11+1, y13+1]}{20947@[b2+1];[y10+1]}	{20945@[b3+1:357.17752, b4+1:470.26312, b5+1:598.32069, b6+1:713.34751, b7+1:895.44843, b7+1:927.42488, b8+1:1008.53764, b9+1:1095.56537, b9+1:1127.53818, b11+1:1305.70218, b12+1:1376.74219, b12+1:1408.71129, b15+1:1746.91794, b15+1:1778.90284];[y3+1:417.24555, y4+1:545.30494, y5+1:616.34180, y7+1:826.47888, y8+1:913.51034, y9+1:1026.59457, y10+1:1208.70217, y10+1:1240.67752, y11+1:1323.72827, y1…	{20945@[b3+1:0.00066, b4+1:0.00219, b5+1:0.00118, b6+1:0.00106, b7+1:-0.00353, b7+1:0.00083, b8+1:0.00161, b9+1:-0.00269, b9+1:-0.00196, b11+1:-0.00271, b12+1:0.00018, b12+1:-0.00279, b15+1:-0.00930, b15+1:0.00352];[y3+1:-0.00006, y4+1:0.00076, y5+1:0.00050, y7+1:0.00075, y8+1:0.00019, y9+1:0.00034, y10+1:0.00243, y10+1:0.00569, y11+1:0.00159, y11+1:-0.00804, y12+1:-0.00911, y12+1:-0.00247, y14+2…	{20945@[b3+1:1.86, b4+1:4.68, b5+1:1.98, b6+1:1.49, b7+1:-3.95, b7+1:0.90, b8+1:1.59, b9+1:-2.46, b9+1:-1.74, b11+1:-2.07, b12+1:0.13, b12+1:-1.98, b15+1:-5.32, b15+1:1.98];[y3+1:-0.15, y4+1:1.39, y5+1:0.81, y7+1:0.91, y8+1:0.20, y9+1:0.34, y10+1:2.01, y10+1:4.59, y11+1:1.20, y11+1:-5.93, y12+1:-6.28, y12+1:-1.67, y14+2:0.47];[M16+1:-1.07, M16+2:0.07]}{20946@[b2+1:-3.09];[y9+1:6.63, y11+1:4.94, y…	{20945@[b3+1:3868, b4+1:4217, b5+1:7404, b6+1:10418, b7+1:7753, b7+1:9606, b8+1:29042, b9+1:20471, b9+1:15775, b11+1:6047, b12+1:5972, b12+1:6816, b15+1:5759, b15+1:4444];[y3+1:8198, y4+1:24941, y5+1:17195, y7+1:103020, y8+1:112749, y9+1:33679, y10+1:5608, y10+1:6201, y11+1:12274, y11+1:5720, y12+1:6750, y12+1:6353, y14+2:5820];[M16+1:53218, M16+2:157710]}{20946@[b2+1:431];[y9+1:67, y11+1:198, y1…	{20945@29}{20946@4}{20947@2}		ApoA1	156	QKVQELQDK	QKVQELQDK(2)	1114.6	7.06498	[y3+1, y4+1, y5+1, y6+1, y7+1];[M9+2, M9+1]	[y3+1:390.20090, y4+1:503.28226, y5+1:632.32670, y6+1:760.38235, y7+1:859.45138];[M9+2:585.31168, M9+1:1201.58852]	[y3+1:0.00258, y4+1:-0.00013, y5+1:0.00172, y6+1:-0.00121, y7+1:-0.00059];[M9+2:0.00000, M9+1:0.00037]	[y3+1:6.62, y4+1:-0.26, y5+1:2.73, y6+1:-1.59, y7+1:-0.69];[M9+2:0.00, M9+1:0.31]	[y3+1:3090, y4+1:6044, y5+1:7828, y6+1:16101, y7+1:24070];[M9+2:37379, M9+1:160818]	7		36.2424	158.008	27	2;2	4	2	8
ApoA1	ApoA1	156	163	ApoA1ApoA1156163	K	K	2	W:\Collaboration_Services\Raw_files_FPL\Fusion Lumos\2021\Zheng\20211204_ZS_WP_SV_ns1_xlms\2021-12-04-10-10-24\Task1-Calibrate\20211203_ZS_WP_SV_ns1_R2-calib.mzML	20881	20867	785.664	4	3138.63	Intra	K;K		ApoA1	163	VQELQDKLSPLAQELR	VQELQDKLSPLAQELR(7)	1866.02	25.166	{20881@[y2+1, y3+1, y4+1, y5+1, y6+1, y7+2, y8+1, y9+1, y10+1, y11+1, y14+2];[b3+1, b4+1, b5+1, b6+1, b7+1, b7+1, b8+1, b8+1, b9+1, b9+1, b11+1, b12+1];[M16+2, M16+2]}{20885@[b2+1]}{20886@[b2+1];[y11+1]}	{20881@[y2+1:288.20234, y3+1:417.24526, y4+1:545.30403, y5+1:616.34173, y6+1:729.42702, y7+2:413.74276, y8+1:913.51042, y9+1:1026.59436, y10+1:1240.66819, y11+1:1355.69868, y14+2:863.44013];[b3+1:357.17661, b4+1:470.25984, b5+1:598.32175, b6+1:713.34693, b7+1:895.45829, b7+1:927.42634, b8+1:1008.53504, b8+1:1040.50786, b9+1:1095.56525, b9+1:1127.54032, b11+1:1337.68280, b12+1:1408.71985];[M16+2:9…	{20881@[y2+1:-0.00068, y3+1:-0.00034, y4+1:-0.00016, y5+1:0.00043, y6+1:0.00166, y7+2:0.00011, y8+1:0.00027, y9+1:0.00014, y10+1:-0.00364, y11+1:-0.00008, y14+2:-0.01102];[b3+1:-0.00025, b4+1:-0.00109, b5+1:0.00224, b6+1:0.00049, b7+1:0.00633, b7+1:0.00229, b8+1:-0.00099, b8+1:-0.00025, b9+1:-0.00281, b9+1:0.00018, b11+1:0.00583, b12+1:0.00577];[M16+2:0.00093, M16+2:0.00049]}{20885@[b2+1:-0.00073…	{20881@[y2+1:-2.36, y3+1:-0.83, y4+1:-0.29, y5+1:0.70, y6+1:2.28, y7+2:0.14, y8+1:0.29, y9+1:0.13, y10+1:-2.93, y11+1:-0.06, y14+2:-6.39];[b3+1:-0.71, b4+1:-2.32, b5+1:3.76, b6+1:0.68, b7+1:7.07, b7+1:2.47, b8+1:-0.98, b8+1:-0.24, b9+1:-2.57, b9+1:0.16, b11+1:4.36, b12+1:4.10];[M16+2:0.48, M16+2:0.25]}{20885@[b2+1:-3.22]}{20886@[b2+1:-3.27];[y11+1:5.84]}	{20881@[y2+1:12534, y3+1:20681, y4+1:68686, y5+1:84495, y6+1:25797, y7+2:75732, y8+1:452606, y9+1:112750, y10+1:11700, y11+1:18982, y14+2:13148];[b3+1:20715, b4+1:12496, b5+1:18175, b6+1:26199, b7+1:23322, b7+1:26259, b8+1:40993, b8+1:96723, b9+1:75135, b9+1:126902, b11+1:20434, b12+1:15336];[M16+2:191390, M16+2:410796]}{20885@[b2+1:146]}{20886@[b2+1:365];[y11+1:173]}	{20881@25}{20885@1}{20886@2}		ApoA1	156	QKVQELQDK	QKVQELQDK(2)	1114.6	8.12793	{20881@[y2+1, y3+1, y4+1, y5+1, y6+1, y7+1];[M9+2, M9+2]}{20883@[b1+1];[y3+1]}{20884@}	{20881@[y2+1:262.13951, y3+1:390.19901, y4+1:503.28162, y5+1:632.32619, y6+1:760.38366, y7+1:859.45127];[M9+2:585.31198, M9+2:601.29776]}{20883@[b1+1:129.06678];[y3+1:390.20035]}{20884@}	{20881@[y2+1:-0.00024, y3+1:0.00068, y4+1:-0.00076, y5+1:0.00121, y6+1:0.00010, y7+1:-0.00070];[M9+2:0.00062, M9+2:0.00009]}{20883@[b1+1:0.00092];[y3+1:0.00203]}{20884@}	{20881@[y2+1:-0.91, y3+1:1.75, y4+1:-1.52, y5+1:1.91, y6+1:0.13, y7+1:-0.82];[M9+2:0.53, M9+2:0.08]}{20883@[b1+1:7.22];[y3+1:5.21]}{20884@}	{20881@[y2+1:19926, y3+1:21290, y4+1:45330, y5+1:63628, y6+1:146505, y7+1:96918];[M9+2:818533, M9+2:330942]}{20883@[b1+1:517];[y3+1:588]}{20884@}	{20881@8}{20883@2}{20884@0}		33.2939	158.008	8	2;2	4	3	2
ApoA1	ApoA1	156	163	ApoA1ApoA1156163	K	K	2	W:\Collaboration_Services\Raw_files_FPL\Fusion Lumos\2021\Zheng\20211204_ZS_WP_SV_ns1_xlms\2021-12-04-10-10-24\Task1-Calibrate\20211203_ZS_WP_SV_ns1_R2-calib.mzML	20971	20950	1047.22	3	3138.63	Intra	K;K		ApoA1	163	VQELQDKLSPLAQELR	VQELQDKLSPLAQELR(7)	1866.02	15.1792	{20971@[b3+1, b7+1, b8+1, b9+1, b9+1];[y3+1, y4+1, y5+1, y7+1, y8+1, y9+1, y10+1, y12+1];[M16+2, M16+1]}{20976@[b2+1];[y11+1]}{20977@[b2+1, b9+1]}	{20971@[b3+1:357.17654, b7+1:895.44888, b8+1:1008.53566, b9+1:1095.56803, b9+1:1127.53826];[y3+1:417.24769, y4+1:545.30586, y5+1:616.34337, y7+1:826.47921, y8+1:913.51052, y9+1:1026.59403, y10+1:1208.70843, y12+1:1483.75406];[M16+2:961.02325, M16+1:1953.01125]}{20976@[b2+1:228.13362];[y11+1:1323.73353]}{20977@[b2+1:228.13362, b9+1:1127.53472]}	{20971@[b3+1:-0.00032, b7+1:-0.00309, b8+1:-0.00038, b9+1:-0.00003, b9+1:-0.00188];[y3+1:0.00208, y4+1:0.00168, y5+1:0.00207, y7+1:0.00108, y8+1:0.00036, y9+1:-0.00019, y10+1:0.00869, y12+1:-0.00329];[M16+2:0.00031, M16+1:0.00026]}{20976@[b2+1:-0.00065];[y11+1:0.00684]}{20977@[b2+1:-0.00065, b9+1:-0.00542]}	{20971@[b3+1:-0.91, b7+1:-3.45, b8+1:-0.37, b9+1:-0.03, b9+1:-1.67];[y3+1:4.99, y4+1:3.08, y5+1:3.36, y7+1:1.31, y8+1:0.39, y9+1:-0.18, y10+1:7.20, y12+1:-2.22];[M16+2:0.16, M16+1:0.13]}{20976@[b2+1:-2.86];[y11+1:5.17]}{20977@[b2+1:-2.86, b9+1:-4.81]}	{20971@[b3+1:2781, b7+1:4882, b8+1:13352, b9+1:11006, b9+1:11057];[y3+1:2724, y4+1:9080, y5+1:7663, y7+1:56041, y8+1:61269, y9+1:18182, y10+1:5313, y12+1:5143];[M16+2:80674, M16+1:5034]}{20976@[b2+1:84];[y11+1:112]}{20977@[b2+1:131, b9+1:42]}	{20971@15}{20976@2}{20977@2}		ApoA1	156	QKVQELQDK	QKVQELQDK(2)	1114.6	6.03019	[y4+1, y5+1, y6+1, y7+1];[M9+2, M9+2]	[y4+1:503.28222, y5+1:632.32361, y6+1:760.38170, y7+1:859.45365];[M9+2:585.31207, M9+2:601.29797]	[y4+1:-0.00017, y5+1:-0.00137, y6+1:-0.00186, y7+1:0.00168];[M9+2:0.00078, M9+2:0.00051]	[y4+1:-0.33, y5+1:-2.17, y6+1:-2.45, y7+1:1.96];[M9+2:0.67, M9+2:0.43]	[y4+1:2815, y5+1:4871, y6+1:5474, y7+1:8247];[M9+2:14762, M9+2:13389]	6		21.2095	158.007	43	2;2	4	1	14
ApoA1	ApoA1	156	163	ApoA1ApoA1156163	K	K	3	W:\Collaboration_Services\Raw_files_FPL\Fusion Lumos\2021\Zheng\20211204_ZS_WP_SV_ns1_xlms\2021-12-04-10-10-24\Task1-Calibrate\20211203_ZS_WP_SV_ns1_R3-calib.mzML	20239	20212	785.664	4	3138.63	Intra	K;K		ApoA1	163	VQELQDKLSPLAQELR	VQELQDKLSPLAQELR(7)	1866.02	17.1576	{20239@[b3+1, b4+1, b5+1, b6+1, b7+1, b8+1, b8+1, b9+1, b9+1];[y3+1, y4+1, y5+1, y7+2, y8+1, y9+1];[M16+2, M16+2]}{20246@[b9+1];[y10+1]}{20247@[b2+1];[y9+1, y11+1]}	{20239@[b3+1:357.17846, b4+1:470.25986, b5+1:598.32029, b6+1:713.34575, b7+1:927.42925, b8+1:1008.53753, b8+1:1040.50909, b9+1:1095.56717, b9+1:1127.53988];[y3+1:417.24644, y4+1:545.30512, y5+1:616.34248, y7+2:413.74339, y8+1:913.51131, y9+1:1026.59460];[M16+2:961.02443, M16+2:977.01043]}{20246@[b9+1:1127.53531];[y10+1:1240.66884]}{20247@[b2+1:228.13372];[y9+1:1026.60026, y11+1:1323.73552]}	{20239@[b3+1:0.00160, b4+1:-0.00106, b5+1:0.00079, b6+1:-0.00069, b7+1:0.00520, b8+1:0.00150, b8+1:0.00098, b9+1:-0.00090, b9+1:-0.00026];[y3+1:0.00083, y4+1:0.00094, y5+1:0.00118, y7+2:0.00138, y8+1:0.00116, y9+1:0.00038];[M16+2:0.00267, M16+2:0.00258]}{20246@[b9+1:-0.00484];[y10+1:-0.00299]}{20247@[b2+1:-0.00055];[y9+1:0.00604, y11+1:0.00883]}	{20239@[b3+1:4.50, b4+1:-2.27, b5+1:1.32, b6+1:-0.97, b7+1:5.61, b8+1:1.49, b8+1:0.94, b9+1:-0.82, b9+1:-0.24];[y3+1:1.98, y4+1:1.72, y5+1:1.91, y7+2:1.67, y8+1:1.27, y9+1:0.37];[M16+2:1.39, M16+2:1.32]}{20246@[b9+1:-4.29];[y10+1:-2.41]}{20247@[b2+1:-2.43];[y9+1:5.88, y11+1:6.68]}	{20239@[b3+1:37891, b4+1:41734, b5+1:38164, b6+1:35336, b7+1:78423, b8+1:89926, b8+1:155810, b9+1:141846, b9+1:149171];[y3+1:58665, y4+1:106246, y5+1:205427, y7+2:183348, y8+1:781996, y9+1:195426];[M16+2:404149, M16+2:890678]}{20246@[b9+1:703];[y10+1:921]}{20247@[b2+1:293];[y9+1:498, y11+1:1021]}	{20239@17}{20246@2}{20247@3}		ApoA1	156	QKVQELQDK	QKVQELQDK(2)	1114.6	8.11655	{20239@[y2+1, y3+1, y4+1, y5+1, y6+1, y7+1];[M9+2, M9+2]}{20244@[y3+1]}{20245@}	{20239@[y2+1:262.14015, y3+1:390.19893, y4+1:503.28296, y5+1:632.32633, y6+1:760.38557, y7+1:859.45168];[M9+2:585.31259, M9+2:601.29793]}{20244@[y3+1:390.20068]}{20245@}	{20239@[y2+1:0.00041, y3+1:0.00061, y4+1:0.00057, y5+1:0.00135, y6+1:0.00201, y7+1:-0.00030];[M9+2:0.00183, M9+2:0.00043]}{20244@[y3+1:0.00235]}{20245@}	{20239@[y2+1:1.56, y3+1:1.57, y4+1:1.13, y5+1:2.13, y6+1:2.65, y7+1:-0.34];[M9+2:1.57, M9+2:0.36]}{20244@[y3+1:6.05]}{20245@}	{20239@[y2+1:33777, y3+1:41293, y4+1:44976, y5+1:145062, y6+1:204024, y7+1:154120];[M9+2:1484126, M9+2:551338]}{20244@[y3+1:943]}{20245@}	{20239@8}{20244@1}{20245@0}		25.2741	158.009	3	2;2	4	3	2
ApoA1	ApoA1	156	163	ApoA1ApoA1156163	K	K	3	W:\Collaboration_Services\Raw_files_FPL\Fusion Lumos\2021\Zheng\20211204_ZS_WP_SV_ns1_xlms\2021-12-04-10-10-24\Task1-Calibrate\20211203_ZS_WP_SV_ns1_R3-calib.mzML	20260	20212	1047.22	3	3138.63	Intra	K;K		ApoA1	163	VQELQDKLSPLAQELR	VQELQDKLSPLAQELR(7)	1866.02	11.1719	{20260@[y4+1, y5+1, y7+1, y8+1, y9+1];[b6+1, b8+1, b9+1, b9+1];[M16+1, M16+2]}{20263@[y11+1]}{20264@[b2+1]}{20265@}	{20260@[y4+1:545.30557, y5+1:616.34085, y7+1:826.47819, y8+1:913.50984, y9+1:1026.59430];[b6+1:713.34559, b8+1:1008.53305, b9+1:1095.56296, b9+1:1127.54150];[M16+1:1921.03800, M16+2:977.00776]}{20263@[y11+1:1323.73413]}{20264@[b2+1:228.13373]}{20265@}	{20260@[y4+1:0.00138, y5+1:-0.00045, y7+1:0.00006, y8+1:-0.00032, y9+1:0.00008];[b6+1:-0.00085, b8+1:-0.00298, b9+1:-0.00510, b9+1:0.00135];[M16+1:-0.00091, M16+2:-0.00276]}{20263@[y11+1:0.00744]}{20264@[b2+1:-0.00053]}{20265@}	{20260@[y4+1:2.54, y5+1:-0.74, y7+1:0.08, y8+1:-0.35, y9+1:0.08];[b6+1:-1.20, b8+1:-2.96, b9+1:-4.66, b9+1:1.20];[M16+1:-0.47, M16+2:-1.41]}{20263@[y11+1:5.63]}{20264@[b2+1:-2.35]}{20265@}	{20260@[y4+1:10153, y5+1:12028, y7+1:62456, y8+1:70562, y9+1:19588];[b6+1:7930, b8+1:16315, b9+1:11812, b9+1:13687];[M16+1:31397, M16+2:106482]}{20263@[y11+1:82]}{20264@[b2+1:37]}{20265@}	{20260@11}{20263@1}{20264@1}{20265@0}		ApoA1	156	QKVQELQDK	QKVQELQDK(2)	1114.6	5.11755	{20260@[y5+1, y6+1, y7+1];[M9+1, M9+1]}{20266@}	{20260@[y5+1:632.32336, y6+1:760.38229, y7+1:859.45076];[M9+1:1169.61530, M9+1:1201.58635]}{20266@}	{20260@[y5+1:-0.00163, y6+1:-0.00127, y7+1:-0.00121];[M9+1:-0.00078, M9+1:-0.00180]}{20266@}	{20260@[y5+1:-2.58, y6+1:-1.67, y7+1:-1.41];[M9+1:-0.66, M9+1:-1.50]}{20266@}	{20260@[y5+1:7255, y6+1:9903, y7+1:14060];[M9+1:109133, M9+1:107451]}{20266@}	{20260@5}{20266@0}		16.2895	158.009	6	2;2	4	53	12
ApoA1	ApoA1	205	261	ApoA1ApoA1205261	K	K	1	W:\Collaboration_Services\Raw_files_FPL\Fusion Lumos\2021\Zheng\20211204_ZS_WP_SV_ns1_xlms\2021-12-04-10-10-24\Task1-Calibrate\20211203_ZS_WP_SV_ns1_R1-calib.mzML	12990	12948	626.567	4	2502.24	Intra	K;K		ApoA1	205	LEALKEGGGSLAEYHAK	LEALKEGGGSLAEYHAK(5)	1771.91	15.1252	{12990@[b2+1, b3+1, b4+1];[y4+1, y5+1, y6+1, y11+2, y13+2, y14+2, y14+2, y15+2, y15+3, y16+2];[M17+3, M17+3]}{12992@[b2+1];[y8+1, y11+1]}{12993@[b2+1];[y8+1]}	{12990@[b2+1:243.13422, b3+1:314.17207, b4+1:427.25621];[y4+1:518.27392, y5+1:647.31659, y6+1:718.35291, y11+2:545.27037, y13+2:716.83149, y14+2:757.38723, y14+2:773.37327, y15+2:792.90507, y15+3:539.59655, y16+2:873.41276];[M17+3:609.64863, M17+3:620.30551]}{12992@[b2+1:243.13392];[y8+1:918.46887, y11+1:1089.53594]}{12993@[b2+1:243.13392];[y8+1:918.46886]}	{12990@[b2+1:0.00029, b3+1:0.00102, b4+1:0.00110];[y4+1:0.00176, y5+1:0.00184, y6+1:0.00104, y11+2:0.00112, y13+2:0.00316, y14+2:0.00266, y14+2:0.00265, y15+2:0.00123, y15+3:0.00136, y16+2:0.00192];[M17+3:0.00305, M17+3:0.00160]}{12992@[b2+1:-0.00001];[y8+1:0.00091, y11+1:0.00359]}{12993@[b2+1:-0.00001];[y8+1:0.00090]}	{12990@[b2+1:1.19, b3+1:3.27, b4+1:2.58];[y4+1:3.41, y5+1:2.84, y6+1:1.45, y11+2:1.03, y13+2:2.20, y14+2:1.76, y14+2:1.71, y15+2:0.78, y15+3:0.84, y16+2:1.10];[M17+3:1.67, M17+3:0.86]}{12992@[b2+1:-0.05];[y8+1:0.99, y11+1:3.30]}{12993@[b2+1:-0.06];[y8+1:0.98]}	{12990@[b2+1:18479, b3+1:12429, b4+1:8401];[y4+1:4714, y5+1:9895, y6+1:17316, y11+2:14653, y13+2:19588, y14+2:14175, y14+2:13398, y15+2:46350, y15+3:8041, y16+2:7030];[M17+3:295065, M17+3:18989]}{12992@[b2+1:437];[y8+1:117, y11+1:499]}{12993@[b2+1:27];[y8+1:54]}	{12990@15}{12992@3}{12993@2}		ApoA1	261	KLNAQ	KLNAQ(1)	572.328	9.05724	[b2+1, b2+1, b3+1, b3+1, b4+1, b4+1];[y2+1, y3+1];[M5+1]	[b2+1:296.19668, b2+1:328.16896, b3+1:410.24085, b3+1:442.21377, b4+1:481.27803, b4+1:513.25017];[y2+1:218.11417, y3+1:332.15704];[M5+1:659.31887]	[b2+1:-0.00018, b2+1:0.00002, b3+1:0.00106, b3+1:0.00190, b4+1:0.00113, b4+1:0.00118];[y2+1:0.00064, y3+1:0.00058];[M5+1:0.00075]	[b2+1:-0.61, b2+1:0.06, b3+1:2.59, b3+1:4.30, b4+1:2.35, b4+1:2.31];[y2+1:2.94, y3+1:1.75];[M5+1:1.14]	[b2+1:3745, b2+1:3592, b3+1:18518, b3+1:5758, b4+1:65213, b4+1:26178];[y2+1:7828, y3+1:10714];[M5+1:90988]	9		24.1824	158.002	16	2;1	3	1	7
ApoA1	ApoA1	205	261	ApoA1ApoA1205261	K	K	3	W:\Collaboration_Services\Raw_files_FPL\Fusion Lumos\2021\Zheng\20211204_ZS_WP_SV_ns1_xlms\2021-12-04-10-10-24\Task1-Calibrate\20211203_ZS_WP_SV_ns1_R3-calib.mzML	12559	12548	626.568	4	2502.24	Intra	K;K		ApoA1	205	LEALKEGGGSLAEYHAK	LEALKEGGGSLAEYHAK(5)	1771.91	12.1381	{12559@[b2+1, b6+1];[y4+1, y5+1, y6+1, y11+2, y13+2, y13+2, y15+2, y15+3];[M17+3, M17+3]}{12561@[b2+1];[y11+1]}{12562@[y11+1]}	{12559@[b2+1:243.13384, b6+1:770.37997];[y4+1:518.27149, y5+1:647.31505, y6+1:718.35173, y11+2:545.26957, y13+2:700.84252, y13+2:716.82921, y15+2:792.90684, y15+3:539.59624];[M17+3:609.64821, M17+3:620.30533]}{12561@[b2+1:243.13352];[y11+1:1089.53416]}{12562@[y11+1:1089.53415]}	{12559@[b2+1:-0.00010, b6+1:0.00466];[y4+1:-0.00067, y5+1:0.00030, y6+1:-0.00013, y11+2:-0.00048, y13+2:-0.00270, y13+2:-0.00139, y15+2:0.00475, y15+3:0.00046];[M17+3:0.00178, M17+3:0.00105]}{12561@[b2+1:-0.00041];[y11+1:0.00181]}{12562@[y11+1:0.00180]}	{12559@[b2+1:-0.39, b6+1:6.06];[y4+1:-1.30, y5+1:0.46, y6+1:-0.19, y11+2:-0.44, y13+2:-1.93, y13+2:-0.97, y15+2:3.00, y15+3:0.28];[M17+3:0.98, M17+3:0.56]}{12561@[b2+1:-1.70];[y11+1:1.66]}{12562@[y11+1:1.65]}	{12559@[b2+1:10550, b6+1:4301];[y4+1:4459, y5+1:4910, y6+1:8376, y11+2:9758, y13+2:6298, y13+2:8981, y15+2:17865, y15+3:7285];[M17+3:200188, M17+3:22312]}{12561@[b2+1:280];[y11+1:78]}{12562@[y11+1:8]}	{12559@12}{12561@2}{12562@1}		ApoA1	261	KLNAQ	KLNAQ(1)	572.328	7.05557	[y2+1, y3+1];[b2+1, b3+1, b4+1, b4+1];[M5+1]	[y2+1:218.11378, y3+1:332.15616];[b2+1:328.16885, b3+1:410.23969, b4+1:481.27619, b4+1:513.24890];[M5+1:659.31738]	[y2+1:0.00025, y3+1:-0.00030];[b2+1:-0.00009, b3+1:-0.00010, b4+1:-0.00072, b4+1:-0.00008];[M5+1:-0.00075]	[y2+1:1.15, y3+1:-0.91];[b2+1:-0.28, b3+1:-0.25, b4+1:-1.50, b4+1:-0.17];[M5+1:-1.14]	[y2+1:4181, y3+1:7136];[b2+1:3864, b3+1:9093, b4+1:27209, b4+1:11806];[M5+1:59545]	7		19.1937	158.004	25	2;1	3	1	44
ApoA1	ApoA1	223	230	ApoA1ApoA1223230	K	K	1	W:\Collaboration_Services\Raw_files_FPL\Fusion Lumos\2021\Zheng\20211204_ZS_WP_SV_ns1_xlms\2021-12-04-10-10-24\Task1-Calibrate\20211203_ZS_WP_SV_ns1_R1-calib.mzML	16330	16277	593.569	4	2370.25	Intra	K;K		ApoA1	223	ASEQLKALGEK	ASEQLKALGEK(6)	1172.64	14.0944	{16330@[y3+1, y4+1, y5+1, y6+1, y7+1, y7+1];[b4+1, b5+1, b6+1, b6+1, b8+1, b8+1];[M11+1, M11+2]}{16333@[y6+1]}{16334@[y7+1, y10+1]}	{16330@[y3+1:333.17690, y4+1:446.26047, y5+1:517.29812, y6+1:699.40441, y7+1:812.48743, y7+1:844.46167];[b4+1:416.17804, b5+1:529.26237, b6+1:711.36834, b6+1:743.33404, b8+1:895.49158, b8+1:927.45612];[M11+1:1227.65780, M11+2:630.31782]}{16333@[y6+1:699.40017]}{16334@[y7+1:844.46538, y10+1:1188.59879]}	{16330@[y3+1:0.00004, y4+1:-0.00046, y5+1:0.00009, y6+1:0.00085, y7+1:-0.00020, y7+1:0.00196];[b4+1:0.00045, b5+1:0.00071, b6+1:0.00116, b6+1:-0.00522, b8+1:0.00323, b8+1:-0.00431];[M11+1:-0.00013, M11+2:-0.00165]}{16333@[y6+1:-0.00339]}{16334@[y7+1:0.00568, y10+1:0.00588]}	{16330@[y3+1:0.13, y4+1:-1.02, y5+1:0.16, y6+1:1.21, y7+1:-0.25, y7+1:2.33];[b4+1:1.08, b5+1:1.35, b6+1:1.64, b6+1:-7.03, b8+1:3.61, b8+1:-4.65];[M11+1:-0.11, M11+2:-1.31]}{16333@[y6+1:-4.86]}{16334@[y7+1:6.73, y10+1:4.95]}	{16330@[y3+1:662861, y4+1:206290, y5+1:565460, y6+1:134716, y7+1:89705, y7+1:89933];[b4+1:112640, b5+1:104089, b6+1:75054, b6+1:78102, b8+1:170850, b8+1:113549];[M11+1:230622, M11+2:1595067]}{16333@[y6+1:3245]}{16334@[y7+1:1790, y10+1:1296]}	{16330@14}{16333@1}{16334@2}		ApoA1	230	AKPVLEDLR	AKPVLEDLR(2)	1039.6	9.17518	{16330@[b2+1, b2+1, b7+1];[y2+1, y4+1, y5+1, y7+1];[M9+2, M9+2]}{16335@}{16336@}	{16330@[b2+1:254.14974, b2+1:286.12191, b7+1:839.39728];[y2+1:288.20302, y4+1:532.27189, y5+1:645.35668, y7+1:841.47703];[M9+2:547.81394, M9+2:563.79878]}{16335@}{16336@}	{16330@[b2+1:-0.00018, b2+1:-0.00009, b7+1:0.00051];[y2+1:0.00001, y4+1:-0.00066, y5+1:0.00006, y7+1:-0.00076];[M9+2:0.00018, M9+2:-0.00223]}{16335@}{16336@}	{16330@[b2+1:-0.69, b2+1:-0.30, b7+1:0.60];[y2+1:0.03, y4+1:-1.25, y5+1:0.09, y7+1:-0.90];[M9+2:0.16, M9+2:-1.98]}{16335@}{16336@}	{16330@[b2+1:254395, b2+1:410845, b7+1:84787];[y2+1:523869, y4+1:381079, y5+1:1156362, y7+1:2528923];[M9+2:1585737, M9+2:920936]}{16335@}{16336@}	{16330@9}{16335@0}{16336@0}		23.2696	158.003	33	2;2	4	22	6
ApoA1	ApoA1	223	230	ApoA1ApoA1223230	K	K	2	W:\Collaboration_Services\Raw_files_FPL\Fusion Lumos\2021\Zheng\20211204_ZS_WP_SV_ns1_xlms\2021-12-04-10-10-24\Task1-Calibrate\20211203_ZS_WP_SV_ns1_R2-calib.mzML	16400	16356	593.569	4	2370.25	Intra	K;K		ApoA1	223	ASEQLKALGEK	ASEQLKALGEK(6)	1172.64	14.0857	{16400@[y3+1, y4+1, y5+1, y6+1, y7+1];[b4+1, b5+1, b6+1, b6+1, b8+1, b8+1, b9+1];[M11+1, M11+2]}{16402@[y6+1]}{16403@}	{16400@[y3+1:333.17702, y4+1:446.26113, y5+1:517.29826, y6+1:731.37705, y7+1:812.48762];[b4+1:416.17753, b5+1:529.26245, b6+1:711.36983, b6+1:743.33524, b8+1:895.48869, b8+1:927.46167, b9+1:984.48080];[M11+1:1227.65765, M11+2:630.31837]}{16402@[y6+1:699.40035]}{16403@}	{16400@[y3+1:0.00016, y4+1:0.00021, y5+1:0.00023, y6+1:0.00140, y7+1:-0.00001];[b4+1:-0.00006, b5+1:0.00080, b6+1:0.00266, b6+1:-0.00401, b8+1:0.00034, b8+1:0.00124, b9+1:-0.00110];[M11+1:-0.00029, M11+2:-0.00055]}{16402@[y6+1:-0.00321]}{16403@}	{16400@[y3+1:0.48, y4+1:0.46, y5+1:0.44, y6+1:1.92, y7+1:-0.01];[b4+1:-0.14, b5+1:1.51, b6+1:3.74, b6+1:-5.41, b8+1:0.38, b8+1:1.33, b9+1:-1.12];[M11+1:-0.24, M11+2:-0.43]}{16402@[y6+1:-4.60]}{16403@}	{16400@[y3+1:537678, y4+1:275568, y5+1:471373, y6+1:90766, y7+1:57951];[b4+1:65556, b5+1:137275, b6+1:104994, b6+1:69104, b8+1:124051, b8+1:115205, b9+1:54625];[M11+1:222647, M11+2:1498140]}{16402@[y6+1:5927]}{16403@}	{16400@14}{16402@1}{16403@0}		ApoA1	230	AKPVLEDLR	AKPVLEDLR(2)	1039.6	11.2232	{16400@[b2+1, b2+1, b4+1, b7+1];[y2+1, y3+1, y4+1, y5+1, y7+2];[M9+2, M9+2]}{16404@}{16405@}	{16400@[b2+1:254.14984, b2+1:286.12205, b4+1:482.24546, b7+1:807.42213];[y2+1:288.20292, y3+1:403.22855, y4+1:532.27240, y5+1:645.35648, y7+2:421.24257];[M9+2:547.81391, M9+2:563.79955]}{16404@}{16405@}	{16400@[b2+1:-0.00008, b2+1:0.00006, b4+1:0.00229, b7+1:-0.00257];[y2+1:-0.00009, y3+1:-0.00141, y4+1:-0.00015, y5+1:-0.00013, y7+2:0.00007];[M9+2:0.00012, M9+2:-0.00069]}{16404@}{16405@}	{16400@[b2+1:-0.30, b2+1:0.20, b4+1:4.76, b7+1:-3.18];[y2+1:-0.33, y3+1:-3.51, y4+1:-0.29, y5+1:-0.20, y7+2:0.09];[M9+2:0.11, M9+2:-0.61]}{16404@}{16405@}	{16400@[b2+1:167316, b2+1:447923, b4+1:72579, b7+1:57322];[y2+1:577604, y3+1:78462, y4+1:421136, y5+1:1189004, y7+2:4415434];[M9+2:1678871, M9+2:856454]}{16404@}{16405@}	{16400@11}{16404@0}{16405@0}		25.3088	158.003	56	2;2	4	5	6
ApoA1	ApoA1	119	130	ApoA1ApoA1119130	K	K	3	W:\Collaboration_Services\Raw_files_FPL\Fusion Lumos\2021\Zheng\20211204_ZS_WP_SV_ns1_xlms\2021-12-04-10-10-24\Task1-Calibrate\20211203_ZS_WP_SV_ns1_R3-calib.mzML	17043	16997	767.875	4	3067.47	Intra	K;K		ApoA1	119	QKVQPYLDEFQK	QKVQPYLDEFQK(2)	1521.78	11.1486	{17043@[b3+1, b3+1, b4+1];[y4+1, y5+1, y6+1, y8+1, y9+1, y10+1];[M12+2, M12+2]}{17047@}{17048@}	{17043@[b3+1:410.24022, b3+1:442.21182, b4+1:570.27150];[y4+1:551.28367, y5+1:666.31213, y6+1:779.39431, y8+1:1039.50957, y9+1:1167.56651, y10+1:1266.63815];[M12+2:788.90542, M12+2:804.89033]}{17047@}{17048@}	{17043@[b3+1:0.00043, b3+1:-0.00005, b4+1:0.00105];[y4+1:0.00129, y5+1:0.00279, y6+1:0.00092, y8+1:0.00008, y9+1:-0.00156, y10+1:0.00168];[M12+2:0.00299, M12+2:0.00072]}{17047@}{17048@}	{17043@[b3+1:1.04, b3+1:-0.11, b4+1:1.84];[y4+1:2.34, y5+1:4.20, y6+1:1.18, y8+1:0.07, y9+1:-1.33, y10+1:1.32];[M12+2:1.90, M12+2:0.45]}{17047@}{17048@}	{17043@[b3+1:12335, b3+1:8894, b4+1:11354];[y4+1:21219, y5+1:30900, y6+1:20346, y8+1:237801, y9+1:45115, y10+1:32478];[M12+2:206732, M12+2:118467]}{17047@}{17048@}	{17043@11}{17047@0}{17048@0}		ApoA1	130	KWHEEVEIYR	KWHEEVEIYR(1)	1387.69	5.13286	{17043@[y6+1, y7+1, y8+2];[M10+1, M10+2]}{17045@[y3+1, y7+1]}{17046@[y3+1, y7+1];[b5+1]}	{17043@[y6+1:808.41737, y7+1:937.46267, y8+2:537.76466];[M10+1:1442.70544, M10+2:737.84353]}{17045@[y3+1:451.26733, y7+1:937.46661]}{17046@[y3+1:451.26737, y7+1:937.46670];[b5+1:764.33452]}	{17043@[y6+1:-0.00258, y7+1:0.00013, y8+2:0.00059];[M10+1:-0.00085, M10+2:0.00141]}{17045@[y3+1:0.00099, y7+1:0.00407]}{17046@[y3+1:0.00102, y7+1:0.00416];[b5+1:-0.00169]}	{17043@[y6+1:-3.19, y7+1:0.14, y8+2:0.55];[M10+1:-0.59, M10+2:0.96]}{17045@[y3+1:2.19, y7+1:4.34]}{17046@[y3+1:2.27, y7+1:4.44];[b5+1:-2.21]}	{17043@[y6+1:6227, y7+1:12735, y8+2:25279];[M10+1:8981, M10+2:613560]}{17045@[y3+1:274, y7+1:1040]}{17046@[y3+1:174, y7+1:598];[b5+1:186]}	{17043@5}{17045@2}{17046@3}		16.2814	158.001	32	2;2	4	3	1
ApoA1	ApoA1	119	156	ApoA1ApoA1119156	K	K	1	W:\Collaboration_Services\Raw_files_FPL\Fusion Lumos\2021\Zheng\20211204_ZS_WP_SV_ns1_xlms\2021-12-04-10-10-24\Task1-Calibrate\20211203_ZS_WP_SV_ns1_R1-calib.mzML	14714	14689	699.604	4	2794.39	Intra	K;K		ApoA1	119	QKVQPYLDEFQK	QKVQPYLDEFQK(2)	1521.78	15.1466	{14714@[b2+1, b3+1, b3+1, b4+1, b4+1];[y3+1, y4+1, y5+1, y6+1, y7+1, y8+1, y9+1, y10+1];[M12+2, M12+2]}{14718@}{14719@}	{14714@[b2+1:343.14225, b3+1:410.23864, b3+1:442.21122, b4+1:538.29511, b4+1:570.26957];[y3+1:422.23876, y4+1:551.28539, y5+1:666.30771, y6+1:779.39168, y7+1:942.45505, y8+1:1039.50887, y9+1:1167.56844, y10+1:1266.63876];[M12+2:788.90331, M12+2:804.88916]}{14718@}{14719@}	{14714@[b2+1:-0.00120, b3+1:-0.00115, b3+1:-0.00065, b4+1:-0.00326, b4+1:-0.00088];[y3+1:-0.00104, y4+1:0.00300, y5+1:-0.00162, y6+1:-0.00171, y7+1:-0.00167, y8+1:-0.00062, y9+1:0.00037, y10+1:0.00228];[M12+2:-0.00123, M12+2:-0.00161]}{14718@}{14719@}	{14714@[b2+1:-3.52, b3+1:-2.80, b3+1:-1.48, b4+1:-6.07, b4+1:-1.54];[y3+1:-2.46, y4+1:5.46, y5+1:-2.43, y6+1:-2.20, y7+1:-1.78, y8+1:-0.60, y9+1:0.32, y10+1:1.80];[M12+2:-0.78, M12+2:-1.00]}{14718@}{14719@}	{14714@[b2+1:7499, b3+1:8260, b3+1:11369, b4+1:5164, b4+1:11045];[y3+1:4627, y4+1:5197, y5+1:18039, y6+1:26452, y7+1:9531, y8+1:176998, y9+1:14889, y10+1:9208];[M12+2:62453, M12+2:137538]}{14718@}{14719@}	{14714@15}{14718@0}{14719@0}		ApoA1	156	QKVQELQDK	QKVQELQDK(2)	1114.6	8.09486	{14714@[y2+1, y3+1, y4+1, y5+1, y6+1, y7+1];[M9+2, M9+1]}{14716@[y3+1]}{14717@[y8+1]}	{14714@[y2+1:262.13975, y3+1:390.19780, y4+1:503.28216, y5+1:632.32323, y6+1:760.38282, y7+1:859.45290];[M9+2:585.31120, M9+1:1201.58756]}{14716@[y3+1:390.19975]}{14717@[y8+1:1073.53264]}	{14714@[y2+1:-0.00000, y3+1:-0.00052, y4+1:-0.00023, y5+1:-0.00176, y6+1:-0.00074, y7+1:0.00093];[M9+2:-0.00096, M9+1:-0.00059]}{14716@[y3+1:0.00142]}{14717@[y8+1:0.00306]}	{14714@[y2+1:-0.01, y3+1:-1.34, y4+1:-0.46, y5+1:-2.78, y6+1:-0.98, y7+1:1.08];[M9+2:-0.82, M9+1:-0.49]}{14716@[y3+1:3.65]}{14717@[y8+1:2.86]}	{14714@[y2+1:4539, y3+1:7794, y4+1:12028, y5+1:17010, y6+1:27139, y7+1:24011];[M9+2:226723, M9+1:9658]}{14716@[y3+1:121]}{14717@[y8+1:150]}	{14714@8}{14716@1}{14717@1}		23.2415	158.006	21	2;2	4	4	82
ApoA1	ApoA1	141	205	ApoA1ApoA1141205	K	K	2	W:\Collaboration_Services\Raw_files_FPL\Fusion Lumos\2021\Zheng\20211204_ZS_WP_SV_ns1_xlms\2021-12-04-10-10-24\Task1-Calibrate\20211203_ZS_WP_SV_ns1_R2-calib.mzML	17003	16953	641.527	5	3202.6	Intra	K;K		ApoA1	141	QKVAPLGEEFR	QKVAPLGEEFR(2)	1272.68	10.1138	{17003@[y2+1, y3+1, y4+1, y5+1, y7+2, y8+1];[b4+1, b4+1];[M11+2, M11+2]}{17007@}{17008@}	{17003@[y2+1:322.18765, y3+1:451.23052, y4+1:580.27237, y5+1:637.29473, y7+2:424.21962, y8+1:918.46850];[b4+1:481.27899, b4+1:513.24995];[M11+2:664.35408, M11+2:680.34067]}{17007@}{17008@}	{17003@[y2+1:0.00029, y3+1:0.00056, y4+1:-0.00018, y5+1:0.00071, y7+2:0.00111, y8+1:0.00054];[b4+1:0.00208, b4+1:0.00096];[M11+2:0.00041, M11+2:0.00151]}{17007@}{17008@}	{17003@[y2+1:0.89, y3+1:1.24, y4+1:-0.31, y5+1:1.12, y7+2:1.32, y8+1:0.59];[b4+1:4.34, b4+1:1.88];[M11+2:0.31, M11+2:1.11]}{17007@}{17008@}	{17003@[y2+1:8641, y3+1:16201, y4+1:6040, y5+1:20700, y7+2:22258, y8+1:10985];[b4+1:4524, b4+1:9895];[M11+2:24598, M11+2:56470]}{17007@}{17008@}	{17003@10}{17007@0}{17008@0}		ApoA1	205	LEALKEGGGSLAEYHAK	LEALKEGGGSLAEYHAK(5)	1771.91	5.11391	{17003@[y6+1, y11+2];[b11+1];[M17+3, M17+2]}{17005@[y11+1]}{17006@[b2+1]}	{17003@[y6+1:718.35288, y11+2:545.27070];[b11+1:1109.58973];[M17+3:609.64791, M17+2:929.95344]}{17005@[y11+1:1089.53341]}{17006@[b2+1:243.13365]}	{17003@[y6+1:0.00101, y11+2:0.00177];[b11+1:0.00602];[M17+3:0.00088, M17+2:-0.00077]}{17005@[y11+1:0.00107]}{17006@[b2+1:-0.00028]}	{17003@[y6+1:1.41, y11+2:1.63];[b11+1:5.43];[M17+3:0.48, M17+2:-0.42]}{17005@[y11+1:0.98]}{17006@[b2+1:-1.15]}	{17003@[y6+1:5292, y11+2:16479];[b11+1:4251];[M17+3:135293, M17+2:19194]}{17005@[y11+1:112]}{17006@[b2+1:13]}	{17003@5}{17005@1}{17006@1}		15.2277	158.003	28	2;2	4	4	1
ApoA1	ApoA1	141	219	ApoA1ApoA1141219	K	S	3	W:\Collaboration_Services\Raw_files_FPL\Fusion Lumos\2021\Zheng\20211204_ZS_WP_SV_ns1_xlms\2021-12-04-10-10-24\Task1-Calibrate\20211203_ZS_WP_SV_ns1_R3-calib.mzML	15893	15863	651.838	4	2603.32	Intra	K;S		ApoA1	141	QKVAPLGEEFR	QKVAPLGEEFR(2)	1272.68	7.09936	{15893@[y2+1, y5+1, y7+1, y8+1];[M11+2, M11+2];[b4+1]}{15901@[y8+1]}{15902@}	{15893@[y2+1:322.18667, y5+1:637.29253, y7+1:847.43049, y8+1:918.46219];[M11+2:664.35390, M11+2:680.33834];[b4+1:513.24819]}{15901@[y8+1:918.46684]}{15902@}	{15893@[y2+1:-0.00069, y5+1:-0.00149, y7+1:-0.00035, y8+1:-0.00577];[M11+2:0.00005, M11+2:-0.00315];[b4+1:-0.00080]}{15901@[y8+1:-0.00111]}{15902@}	{15893@[y2+1:-2.16, y5+1:-2.33, y7+1:-0.42, y8+1:-6.29];[M11+2:0.04, M11+2:-2.32];[b4+1:-1.56]}{15901@[y8+1:-1.21]}{15902@}	{15893@[y2+1:4778, y5+1:18871, y7+1:59678, y8+1:10214];[M11+2:20687, M11+2:43316];[b4+1:5381]}{15901@[y8+1:53]}{15902@}	{15893@7}{15901@1}{15902@0}		ApoA1	219	ASEQLKALGEK	ASEQLKALGEK(2)	1172.64	4.06396	{15893@[y3+1, y5+1];[b7+1];[M11+2]}{15899@}	{15893@[y3+1:333.17645, y5+1:517.29647];[b7+1:782.39911];[M11+2:614.33159]}{15899@}	{15893@[y3+1:-0.00041, y5+1:-0.00157];[b7+1:-0.00518];[M11+2:-0.00204]}{15899@}	{15893@[y3+1:-1.23, y5+1:-3.05];[b7+1:-6.63];[M11+2:-1.66]}{15899@}	{15893@[y3+1:8795, y5+1:10296];[b7+1:9175];[M11+2:76621]}{15899@}	{15893@4}{15899@0}		11.1633	158.002	18	2;1	3	10	4
ApoA1	ApoA1	141	223	ApoA1ApoA1141223	K	K	1	W:\Collaboration_Services\Raw_files_FPL\Fusion Lumos\2021\Zheng\20211204_ZS_WP_SV_ns1_xlms\2021-12-04-10-10-24\Task1-Calibrate\20211203_ZS_WP_SV_ns1_R1-calib.mzML	16580	16542	651.839	4	2603.33	Intra	K;K		ApoA1	141	QKVAPLGEEFR	QKVAPLGEEFR(2)	1272.68	11.0715	{16580@[y2+1, y3+1, y4+1, y5+1, y6+1, y7+2, y8+2, y9+1];[M11+2, M11+2];[b4+1]}{16584@[y9+1]}{16585@[y9+1]}	{16580@[y2+1:322.18788, y3+1:451.23027, y4+1:580.27486, y5+1:637.29479, y6+1:750.37775, y7+2:424.21932, y8+2:459.73770, y9+1:1017.53735];[M11+2:664.35478, M11+2:680.34029];[b4+1:513.24934]}{16584@[y9+1:1017.53275]}{16585@[y9+1:1017.53427]}	{16580@[y2+1:0.00051, y3+1:0.00031, y4+1:0.00231, y5+1:0.00077, y6+1:-0.00033, y7+2:0.00053, y8+2:0.00017, y9+1:0.00098];[M11+2:0.00180, M11+2:0.00075];[b4+1:0.00036]}{16584@[y9+1:-0.00362]}{16585@[y9+1:-0.00210]}	{16580@[y2+1:1.59, y3+1:0.69, y4+1:3.98, y5+1:1.21, y6+1:-0.44, y7+2:0.62, y8+2:0.18, y9+1:0.96];[M11+2:1.36, M11+2:0.55];[b4+1:0.70]}{16584@[y9+1:-3.56]}{16585@[y9+1:-2.07]}	{16580@[y2+1:12263, y3+1:17728, y4+1:9664, y5+1:90515, y6+1:11039, y7+2:58950, y8+2:26820, y9+1:51061];[M11+2:55272, M11+2:113317];[b4+1:11782]}{16584@[y9+1:122]}{16585@[y9+1:133]}	{16580@11}{16584@1}{16585@1}		ApoA1	223	ASEQLKALGEK	ASEQLKALGEK(6)	1172.64	11.0649	{16580@[y3+1, y4+1, y5+1, y6+1, y7+1, y10+1];[b5+1, b6+1, b8+1];[M11+2, M11+2]}{16582@}{16583@}	{16580@[y3+1:333.17736, y4+1:446.26078, y5+1:517.29829, y6+1:699.40376, y7+1:812.49274, y10+1:1156.62601];[b5+1:529.26437, b6+1:743.33776, b8+1:895.48513];[M11+2:614.33265, M11+2:630.31916]}{16582@}{16583@}	{16580@[y3+1:0.00050, y4+1:-0.00014, y5+1:0.00025, y6+1:0.00020, y7+1:0.00511, y10+1:0.00519];[b5+1:0.00272, b6+1:-0.00149, b8+1:-0.00322];[M11+2:0.00008, M11+2:0.00102]}{16582@}{16583@}	{16580@[y3+1:1.50, y4+1:-0.32, y5+1:0.48, y6+1:0.29, y7+1:6.30, y10+1:4.49];[b5+1:5.15, b6+1:-2.01, b8+1:-3.60];[M11+2:0.06, M11+2:0.81]}{16582@}{16583@}	{16580@[y3+1:26615, y4+1:9306, y5+1:31401, y6+1:6642, y7+1:5721, y10+1:6145];[b5+1:10223, b6+1:6685, b8+1:8558];[M11+2:242500, M11+2:62745]}{16582@}{16583@}	{16580@11}{16582@0}{16583@0}		22.1364	158.005	4	2;2	4	6	3
ApoA1	ApoA1	141	228	ApoA1ApoA1141228	K	K	3	W:\Collaboration_Services\Raw_files_FPL\Fusion Lumos\2021\Zheng\20211204_ZS_WP_SV_ns1_xlms\2021-12-04-10-10-24\Task1-Calibrate\20211203_ZS_WP_SV_ns1_R3-calib.mzML	18267	18244	743.152	4	2968.58	Intra	K;K		ApoA1	141	QKVAPLGEEFR	QKVAPLGEEFR(2)	1272.68	7.15407	{18267@[y3+1, y5+1, y7+1, y8+1, y9+1];[M11+2, M11+2]}{18271@[y8+1, y9+1]}{18272@[y8+1]}	{18267@[y3+1:451.22998, y5+1:637.29191, y7+1:847.42875, y8+1:918.46435, y9+1:1017.53760];[M11+2:664.35288, M11+2:680.33876]}{18271@[y8+1:918.46638, y9+1:1017.53158]}{18272@[y8+1:918.46631]}	{18267@[y3+1:0.00002, y5+1:-0.00210, y7+1:-0.00209, y8+1:-0.00361, y9+1:0.00123];[M11+2:-0.00199, M11+2:-0.00231]}{18271@[y8+1:-0.00158, y9+1:-0.00479]}{18272@[y8+1:-0.00165]}	{18267@[y3+1:0.04, y5+1:-3.30, y7+1:-2.47, y8+1:-3.94, y9+1:1.21];[M11+2:-1.50, M11+2:-1.70]}{18271@[y8+1:-1.72, y9+1:-4.72]}{18272@[y8+1:-1.80]}	{18267@[y3+1:3619, y5+1:7910, y7+1:54178, y8+1:16842, y9+1:11414];[M11+2:91098, M11+2:17779]}{18271@[y8+1:129, y9+1:279]}{18272@[y8+1:11]}	{18267@7}{18271@2}{18272@1}		ApoA1	228	ALGEKAKPVLEDLR	ALGEKAKPVLEDLR(5)	1537.88	5.1967	{18267@[y2+1, y7+1];[b12+1];[M14+2, M14+2]}{18269@[b5+1]}{18270@}	{18267@[y2+1:288.20261, y7+1:841.47500];[b12+1:1305.69978];[M14+2:796.95221, M14+2:812.93841]}{18269@[b5+1:585.26647]}{18270@}	{18267@[y2+1:-0.00041, y7+1:-0.00280];[b12+1:-0.00511];[M14+2:-0.00348, M14+2:-0.00317]}{18269@[b5+1:-0.00365]}{18270@}	{18267@[y2+1:-1.41, y7+1:-3.33];[b12+1:-3.91];[M14+2:-2.19, M14+2:-1.95]}{18269@[b5+1:-6.24]}{18270@}	{18267@[y2+1:8362, y7+1:8957];[b12+1:3983];[M14+2:76175, M14+2:161496]}{18269@[b5+1:50]}{18270@}	{18267@5}{18269@1}{18270@0}		12.3508	158.012	27	2;2	4	9	1
ApoA1	ApoA1	141	230	ApoA1ApoA1141230	K	K	3	W:\Collaboration_Services\Raw_files_FPL\Fusion Lumos\2021\Zheng\20211204_ZS_WP_SV_ns1_xlms\2021-12-04-10-10-24\Task1-Calibrate\20211203_ZS_WP_SV_ns1_R3-calib.mzML	18717	18687	618.581	4	2470.29	Intra	K;K		ApoA1	230	AKPVLEDLR	AKPVLEDLR(2)	1039.6	9.08682	{18717@[b2+1, b2+1];[y2+1, y4+1, y5+1, y6+1, y7+1];[M9+2, M9+2]}{18724@}{18725@}	{18717@[b2+1:254.15008, b2+1:286.12089];[y2+1:288.20271, y4+1:532.27195, y5+1:645.35594, y6+1:744.42403, y7+1:841.47611];[M9+2:547.81360, M9+2:563.79985]}{18724@}{18725@}	{18717@[b2+1:0.00017, b2+1:-0.00110];[y2+1:-0.00031, y4+1:-0.00060, y5+1:-0.00068, y6+1:-0.00100, y7+1:-0.00169];[M9+2:-0.00051, M9+2:-0.00009]}{18724@}{18725@}	{18717@[b2+1:0.66, b2+1:-3.86];[y2+1:-1.07, y4+1:-1.13, y5+1:-1.05, y6+1:-1.34, y7+1:-2.01];[M9+2:-0.46, M9+2:-0.08]}{18724@}{18725@}	{18717@[b2+1:4625, b2+1:5742];[y2+1:16721, y4+1:11272, y5+1:37147, y6+1:7992, y7+1:74709];[M9+2:50832, M9+2:10722]}{18724@}{18725@}	{18717@9}{18724@0}{18725@0}		ApoA1	141	QKVAPLGEEFR	QKVAPLGEEFR(2)	1272.68	9.08368	{18717@[y2+1, y5+1, y7+1, y8+2, y9+1];[b4+1, b4+1];[M11+2, M11+2]}{18722@[y8+1]}{18723@}	{18717@[y2+1:322.18649, y5+1:637.29350, y7+1:847.42987, y8+2:459.73798, y9+1:1017.53458];[b4+1:481.27829, b4+1:513.24669];[M11+2:664.35289, M11+2:680.33869]}{18722@[y8+1:918.46471]}{18723@}	{18717@[y2+1:-0.00087, y5+1:-0.00051, y7+1:-0.00097, y8+2:0.00072, y9+1:-0.00180];[b4+1:0.00138, b4+1:-0.00229];[M11+2:-0.00196, M11+2:-0.00246]}{18722@[y8+1:-0.00325]}{18723@}	{18717@[y2+1:-2.72, y5+1:-0.81, y7+1:-1.15, y8+2:0.79, y9+1:-1.77];[b4+1:2.88, b4+1:-4.48];[M11+2:-1.48, M11+2:-1.81]}{18722@[y8+1:-3.54]}{18723@}	{18717@[y2+1:3980, y5+1:21694, y7+1:71374, y8+2:6529, y9+1:5422];[b4+1:3716, b4+1:7110];[M11+2:39145, M11+2:52839]}{18722@[y8+1:70]}{18723@}	{18717@9}{18722@1}{18723@0}		18.1705	158.009	55	2;2	4	30	21
ApoA1	ApoA1	156	261	ApoA1ApoA1156261	K	K	1	W:\Collaboration_Services\Raw_files_FPL\Fusion Lumos\2021\Zheng\20211204_ZS_WP_SV_ns1_xlms\2021-12-04-10-10-24\Task1-Calibrate\20211203_ZS_WP_SV_ns1_R1-calib.mzML	8332	8314	615.983	3	1844.93	Intra	K;K		ApoA1	261	KLNAQ	KLNAQ(1)	572.328	9.0509	[y2+1, y3+1];[b2+1, b3+1, b3+1, b4+1, b4+1];[M5+1, M5+1]	[y2+1:218.11318, y3+1:332.15580];[b2+1:328.16856, b3+1:410.23924, b3+1:442.20865, b4+1:481.27693, b4+1:513.24759];[M5+1:627.34498, M5+1:659.31736]	[y2+1:-0.00036, y3+1:-0.00066];[b2+1:-0.00038, b3+1:-0.00055, b3+1:-0.00322, b4+1:0.00002, b4+1:-0.00140];[M5+1:-0.00107, M5+1:-0.00077]	[y2+1:-1.64, y3+1:-1.99];[b2+1:-1.18, b3+1:-1.35, b3+1:-7.30, b4+1:0.04, b4+1:-2.73];[M5+1:-1.70, M5+1:-1.17]	[y2+1:9536, y3+1:5271];[b2+1:3019, b3+1:8505, b3+1:3227, b4+1:11881, b4+1:12205];[M5+1:33529, M5+1:43894]	9		ApoA1	156	QKVQELQDK	QKVQELQDK(2)	1114.6	5.05363	{8332@[y5+1, y6+1, y7+1];[M9+1, M9+2]}{8334@[y3+1]}{8335@[b6+1]}	{8332@[y5+1:632.32480, y6+1:760.37975, y7+1:859.45222];[M9+1:1169.61447, M9+2:601.29691]}{8334@[y3+1:390.19988]}{8335@[b6+1:812.39975]}	{8332@[y5+1:-0.00018, y6+1:-0.00381, y7+1:0.00025];[M9+1:-0.00160, M9+2:-0.00160]}{8334@[y3+1:0.00155]}{8335@[b6+1:0.00265]}	{8332@[y5+1:-0.29, y6+1:-5.02, y7+1:0.29];[M9+1:-1.37, M9+2:-1.33]}{8334@[y3+1:3.99]}{8335@[b6+1:3.26]}	{8332@[y5+1:4383, y6+1:9051, y7+1:5602];[M9+1:14518, M9+2:104552]}{8334@[y3+1:50]}{8335@[b6+1:33]}	{8332@5}{8334@1}{8335@1}		14.1045	158	14	2;2	4	53	16
ApoA1	ApoA1	163	163	ApoA1ApoA1163163	K	K	2	W:\Collaboration_Services\Raw_files_FPL\Fusion Lumos\2021\Zheng\20211204_ZS_WP_SV_ns1_xlms\2021-12-04-10-10-24\Task1-Calibrate\20211203_ZS_WP_SV_ns1_R2-calib.mzML	29620	29576	973.518	4	3890.04	Intra	K;K		ApoA1	163	VQELQDKLSPLAQELR	VQELQDKLSPLAQELR(7)	1866.02	6.17188	[y5+1, y7+1, y8+1, y9+1];[b7+1, b9+1]	[y5+1:616.33704, y7+1:826.47716, y8+1:913.50800, y9+1:1026.59795];[b7+1:895.44764, b9+1:1127.53738]	[y5+1:-0.00426, y7+1:-0.00097, y8+1:-0.00215, y9+1:0.00373];[b7+1:-0.00432, b9+1:-0.00276]	[y5+1:-6.92, y7+1:-1.18, y8+1:-2.36, y9+1:3.64];[b7+1:-4.83, b9+1:-2.45]	[y5+1:5172, y7+1:29948, y8+1:26799, y9+1:6984];[b7+1:3749, b9+1:6034]	6		ApoA1	163	VQELQDKLSPLAQELR	VQELQDKLSPLAQELR(7)	1866.02	6.17188	[y5+1, y7+1, y8+1, y9+1];[b7+1, b9+1]	[y5+1:616.33704, y7+1:826.47716, y8+1:913.50800, y9+1:1026.59795];[b7+1:895.44764, b9+1:1127.53738]	[y5+1:-0.00426, y7+1:-0.00097, y8+1:-0.00215, y9+1:0.00373];[b7+1:-0.00432, b9+1:-0.00276]	[y5+1:-6.92, y7+1:-1.18, y8+1:-2.36, y9+1:3.64];[b7+1:-4.83, b9+1:-2.45]	[y5+1:5172, y7+1:29948, y8+1:26799, y9+1:6984];[b7+1:3749, b9+1:6034]	6		12.3438	157.999	5	0;0	0	-	-
ApoA1	ApoA1	214	228	ApoA1ApoA1214228	K	Y	2	W:\Collaboration_Services\Raw_files_FPL\Fusion Lumos\2021\Zheng\20211204_ZS_WP_SV_ns1_xlms\2021-12-04-10-10-24\Task1-Calibrate\20211203_ZS_WP_SV_ns1_R2-calib.mzML	16239	16220	714.968	5	3569.8	Intra	K;Y		ApoA1	228	ALGEKAKPVLEDLR	ALGEKAKPVLEDLR(5)	1537.88	16.1005	{16239@[y2+1, y4+1, y5+1, y7+2, y9+2, y10+2, y12+3, y12+2];[b4+1, b5+1, b6+1, b7+2, b7+1, b12+2];[M14+3, M14+3]}{16243@}{16244@}	{16239@[y2+1:288.20305, y4+1:532.27111, y5+1:645.35721, y7+2:421.24288, y9+2:520.80911, y10+2:611.86148, y12+3:470.26527, y12+2:720.88073];[b4+1:371.19233, b5+1:553.29737, b6+1:624.33606, b7+2:376.71896, b7+1:784.40434, b12+2:653.35721];[M14+3:531.63891, M14+3:542.29646]}{16243@}{16244@}	{16239@[y2+1:0.00003, y4+1:-0.00144, y5+1:0.00059, y7+2:0.00069, y9+2:0.00108, y10+2:0.00030, y12+3:0.00179, y12+2:0.00265];[b4+1:-0.00018, b5+1:-0.00066, b6+1:0.00091, b7+2:0.00054, b7+1:0.00215, b12+2:0.00226];[M14+3:0.00156, M14+3:0.00210]}{16243@}{16244@}	{16239@[y2+1:0.11, y4+1:-2.71, y5+1:0.92, y7+2:0.82, y9+2:1.04, y10+2:0.24, y12+3:1.27, y12+2:1.84];[b4+1:-0.49, b5+1:-1.19, b6+1:1.46, b7+2:0.72, b7+1:2.75, b12+2:1.73];[M14+3:0.98, M14+3:1.30]}{16243@}{16244@}	{16239@[y2+1:120106, y4+1:29485, y5+1:54259, y7+2:166991, y9+2:36076, y10+2:40983, y12+3:107012, y12+2:85080];[b4+1:18135, b5+1:17131, b6+1:56245, b7+2:56131, b7+1:22478, b12+2:58546];[M14+3:584769, M14+3:88713]}{16243@}{16244@}	{16239@16}{16243@0}{16244@0}		ApoA1	214	EGGGSLAEYHAKASEQLK	EGGGSLAEYHAKASEQLK(9)	1873.92	8.02709	[y5+1, y6+1, y10+2, y11+2, y12+2, y13+2];[M18+3, M18+3]	[y5+1:604.33092, y6+1:675.36606, y10+2:614.82050, y11+2:679.34173, y12+2:730.84643, y13+2:771.40191];[M18+3:643.65053, M18+3:654.30752]	[y5+1:0.00085, y6+1:-0.00112, y10+2:0.00167, y11+2:0.00153, y12+2:0.00174, y13+2:0.00072];[M18+3:0.00220, M18+3:0.00109]	[y5+1:1.41, y6+1:-1.66, y10+2:1.36, y11+2:1.13, y12+2:1.19, y13+2:0.46];[M18+3:1.14, M18+3:0.55]	[y5+1:18758, y6+1:31277, y10+2:61892, y11+2:50638, y12+2:53408, y13+2:34131];[M18+3:105881, M18+3:59812]	8		24.1276	158.004	44	2;2	4	2	9
ApoA1	ApoA1	223	223	ApoA1ApoA1223223	K	K	2	W:\Collaboration_Services\Raw_files_FPL\Fusion Lumos\2021\Zheng\20211204_ZS_WP_SV_ns1_xlms\2021-12-04-10-10-24\Task1-Calibrate\20211203_ZS_WP_SV_ns1_R2-calib.mzML	13840	13806	626.828	4	2503.28	Intra	K;K		ApoA1	223	ASEQLKALGEK	ASEQLKALGEK(6)	1172.64	18.2849	[y2+1, y3+1, y4+1, y5+1, y6+1, y6+1, y7+1, y8+1, y9+1];[b4+1, b5+1, b6+1, b6+1, b7+1, b7+1, b8+1, b8+1];[M11+2]	[y2+1:276.15476, y3+1:333.17686, y4+1:446.25999, y5+1:517.29874, y6+1:699.40147, y6+1:731.37592, y7+1:844.46108, y8+1:972.51360, y9+1:1101.56178];[b4+1:416.17563, b5+1:529.26214, b6+1:711.36904, b6+1:743.33949, b7+1:782.40617, b7+1:814.37610, b8+1:895.48583, b8+1:927.46526];[M11+2:614.33273]	[y2+1:-0.00064, y3+1:-0.00000, y4+1:-0.00093, y5+1:0.00070, y6+1:-0.00209, y6+1:0.00028, y7+1:0.00137, y8+1:-0.00469, y9+1:0.00090];[b4+1:-0.00195, b5+1:0.00048, b6+1:0.00186, b6+1:0.00023, b7+1:0.00188, b7+1:-0.00027, b8+1:-0.00252, b8+1:0.00482];[M11+2:0.00025]	[y2+1:-2.32, y3+1:-0.00, y4+1:-2.09, y5+1:1.36, y6+1:-2.99, y6+1:0.38, y7+1:1.63, y8+1:-4.83, y9+1:0.82];[b4+1:-4.71, b5+1:0.92, b6+1:2.62, b6+1:0.32, b7+1:2.40, b7+1:-0.33, b8+1:-2.82, b8+1:5.21];[M11+2:0.21]	[y2+1:7777, y3+1:30100, y4+1:21446, y5+1:43635, y6+1:7880, y6+1:26069, y7+1:10968, y8+1:8262, y9+1:4820];[b4+1:5822, b5+1:13595, b6+1:6730, b6+1:16273, b7+1:6301, b7+1:8045, b8+1:9287, b8+1:18465];[M11+2:210145]	18		ApoA1	223	ASEQLKALGEK	ASEQLKALGEK(6)	1172.64	18.2849	[y2+1, y3+1, y4+1, y5+1, y6+1, y6+1, y7+1, y8+1, y9+1];[b4+1, b5+1, b6+1, b6+1, b7+1, b7+1, b8+1, b8+1];[M11+2]	[y2+1:276.15476, y3+1:333.17686, y4+1:446.25999, y5+1:517.29874, y6+1:699.40147, y6+1:731.37592, y7+1:844.46108, y8+1:972.51360, y9+1:1101.56178];[b4+1:416.17563, b5+1:529.26214, b6+1:711.36904, b6+1:743.33949, b7+1:782.40617, b7+1:814.37610, b8+1:895.48583, b8+1:927.46526];[M11+2:614.33273]	[y2+1:-0.00064, y3+1:-0.00000, y4+1:-0.00093, y5+1:0.00070, y6+1:-0.00209, y6+1:0.00028, y7+1:0.00137, y8+1:-0.00469, y9+1:0.00090];[b4+1:-0.00195, b5+1:0.00048, b6+1:0.00186, b6+1:0.00023, b7+1:0.00188, b7+1:-0.00027, b8+1:-0.00252, b8+1:0.00482];[M11+2:0.00025]	[y2+1:-2.32, y3+1:-0.00, y4+1:-2.09, y5+1:1.36, y6+1:-2.99, y6+1:0.38, y7+1:1.63, y8+1:-4.83, y9+1:0.82];[b4+1:-4.71, b5+1:0.92, b6+1:2.62, b6+1:0.32, b7+1:2.40, b7+1:-0.33, b8+1:-2.82, b8+1:5.21];[M11+2:0.21]	[y2+1:7777, y3+1:30100, y4+1:21446, y5+1:43635, y6+1:7880, y6+1:26069, y7+1:10968, y8+1:8262, y9+1:4820];[b4+1:5822, b5+1:13595, b6+1:6730, b6+1:16273, b7+1:6301, b7+1:8045, b8+1:9287, b8+1:18465];[M11+2:210145]	18		36.5699	158.004	21	1;1	2	1	1
ApoA1	ApoA1	223	261	ApoA1ApoA1223261	K	K	1	W:\Collaboration_Services\Raw_files_FPL\Fusion Lumos\2021\Zheng\20211204_ZS_WP_SV_ns1_xlms\2021-12-04-10-10-24\Task1-Calibrate\20211203_ZS_WP_SV_ns1_R1-calib.mzML	11299	11289	635.332	3	1902.97	Intra	K;K		ApoA1	223	ASEQLKALGEK	ASEQLKALGEK(6)	1172.64	16.2107	[y2+1, y3+1, y4+1, y5+1, y6+1, y6+1, y8+1];[b5+1, b6+1, b6+1, b7+1, b8+1, b8+1, b10+1, b10+1];[M11+2]	[y2+1:276.15507, y3+1:333.17735, y4+1:446.26040, y5+1:517.29735, y6+1:699.40597, y6+1:731.37730, y8+1:972.52079];[b5+1:529.25989, b6+1:711.36746, b6+1:743.33605, b7+1:814.37502, b8+1:895.48602, b8+1:927.45879, b10+1:1081.55581, b10+1:1113.52531];[M11+2:614.33232]	[y2+1:-0.00033, y3+1:0.00048, y4+1:-0.00052, y5+1:-0.00068, y6+1:0.00241, y6+1:0.00166, y8+1:0.00250];[b5+1:-0.00176, b6+1:0.00029, b6+1:-0.00321, b7+1:-0.00135, b8+1:-0.00233, b8+1:-0.00165, b10+1:0.00340, b10+1:0.00082];[M11+2:-0.00057]	[y2+1:-1.19, y3+1:1.46, y4+1:-1.17, y5+1:-1.32, y6+1:3.45, y6+1:2.27, y8+1:2.58];[b5+1:-3.33, b6+1:0.40, b6+1:-4.33, b7+1:-1.66, b8+1:-2.61, b8+1:-1.78, b10+1:3.15, b10+1:0.73];[M11+2:-0.47]	[y2+1:5356, y3+1:34675, y4+1:10989, y5+1:26498, y6+1:5400, y6+1:9232, y8+1:5594];[b5+1:12103, b6+1:5556, b6+1:13558, b7+1:6856, b8+1:12192, b8+1:17282, b10+1:4319, b10+1:7840];[M11+2:242381]	16		ApoA1	261	KLNAQ	KLNAQ(1)	572.328	8.13437	[y2+1, y3+1];[b3+1, b3+1, b4+1, b4+1];[M5+1, M5+1]	[y2+1:218.11268, y3+1:332.15690];[b3+1:410.23780, b3+1:442.21286, b4+1:481.27693, b4+1:513.24884];[M5+1:627.34549, M5+1:659.31753]	[y2+1:-0.00085, y3+1:0.00044];[b3+1:-0.00199, b3+1:0.00099, b4+1:0.00003, b4+1:-0.00015];[M5+1:-0.00056, M5+1:-0.00060]	[y2+1:-3.91, y3+1:1.32];[b3+1:-4.85, b3+1:2.23, b4+1:0.05, b4+1:-0.28];[M5+1:-0.89, M5+1:-0.91]	[y2+1:4652, y3+1:6074];[b3+1:4717, b3+1:6641, b4+1:12922, b4+1:23410];[M5+1:88455, M5+1:120822]	8		24.3451	158.006	29	1;2	3	55	42
ApoA1	ApoA1	63	156	ApoA1ApoA163156	K	K	1	W:\Collaboration_Services\Raw_files_FPL\Fusion Lumos\2021\Zheng\20211204_ZS_WP_SV_ns1_xlms\2021-12-04-10-10-24\Task1-Calibrate\20211203_ZS_WP_SV_ns1_R1-calib.mzML	24956	24900	817.67	4	3266.65	Intra	K;K		ApoA1	63	DYVAQFEASALGKQLNLK	DYVAQFEASALGKQLNLK(13)	1994.05	9.03322	[b2+1, b3+1, b4+1, b7+1, b8+1, b11+1, b12+1];[y4+1, y5+1]	[b2+1:279.09800, b3+1:378.16628, b4+1:449.20373, b7+1:853.37788, b8+1:924.41189, b11+1:1195.56383, b12+1:1252.57805];[y4+1:487.32389, y5+1:615.38313]	[b2+1:0.00045, b3+1:0.00031, b4+1:0.00066, b7+1:0.00522, b8+1:0.00211, b11+1:0.00085, b12+1:-0.00639];[y4+1:0.00003, y5+1:0.00069]	[b2+1:1.62, b3+1:0.83, b4+1:1.47, b7+1:6.12, b8+1:2.29, b11+1:0.71, b12+1:-5.11];[y4+1:0.06, y5+1:1.13]	[b2+1:16953, b3+1:22637, b4+1:7544, b7+1:9135, b8+1:8516, b11+1:21585, b12+1:6801];[y4+1:10132, y5+1:12685]	9		ApoA1	156	QKVQELQDK	QKVQELQDK(2)	1114.6	5.06346	{24956@[y6+1, y7+1];[M9+2, M9+2];[b5+1]}{24959@}{24960@[b1+1];[y3+1]}{24961@}	{24956@[y6+1:760.38493, y7+1:859.45369];[M9+2:585.31276, M9+2:601.29822];[b5+1:699.31101]}{24959@}{24960@[b1+1:129.06680];[y3+1:390.20040]}{24961@}	{24956@[y6+1:0.00137, y7+1:0.00172];[M9+2:0.00216, M9+2:0.00100];[b5+1:-0.00203]}{24959@}{24960@[b1+1:0.00094];[y3+1:0.00208]}{24961@}	{24956@[y6+1:1.80, y7+1:2.00];[M9+2:1.85, M9+2:0.83];[b5+1:-2.91]}{24959@}{24960@[b1+1:7.35];[y3+1:5.34]}{24961@}	{24956@[y6+1:13503, y7+1:13955];[M9+2:124026, M9+2:63289];[b5+1:6822]}{24959@}{24960@[b1+1:10];[y3+1:37]}{24961@}	{24956@5}{24959@0}{24960@2}{24961@0}		14.0967	158.007	1	0;2	2	-	3
ApoA1	ApoA1	68	156	ApoA1ApoA168156	K	K	2	W:\Collaboration_Services\Raw_files_FPL\Fusion Lumos\2021\Zheng\20211204_ZS_WP_SV_ns1_xlms\2021-12-04-10-10-24\Task1-Calibrate\20211203_ZS_WP_SV_ns1_R2-calib.mzML	30000	29956	862.201	4	3444.78	Intra	K;K		ApoA1	68	QLNLKLLDNWDTLASTLSK	QLNLKLLDNWDTLASTLSK(5)	2172.18	14.1207	{30000@[y3+1, y4+1, y5+1, y6+1, y7+1, y8+1, y9+1, y11+1, y12+1, y13+1, y14+1];[b4+1];[M19+2, M19+2]}{30004@}{30005@}	{30000@[y3+1:347.22816, y4+1:448.27744, y5+1:535.30958, y6+1:606.34710, y7+1:719.43203, y8+1:820.47963, y9+1:935.50631, y11+1:1235.63078, y12+1:1350.65722, y13+1:1463.74082, y14+1:1576.82068];[b4+1:469.27707];[M19+2:1114.10177, M19+2:1130.08996]}{30004@}{30005@}	{30000@[y3+1:-0.00074, y4+1:0.00087, y5+1:0.00097, y6+1:0.00138, y7+1:0.00225, y8+1:0.00217, y9+1:0.00191, y11+1:0.00413, y12+1:0.00363, y13+1:0.00317, y14+1:-0.00103];[b4+1:0.00016];[M19+2:-0.00061, M19+2:0.00370]}{30004@}{30005@}	{30000@[y3+1:-2.13, y4+1:1.94, y5+1:1.82, y6+1:2.28, y7+1:3.13, y8+1:2.65, y9+1:2.04, y11+1:3.35, y12+1:2.69, y13+1:2.17, y14+1:-0.65];[b4+1:0.34];[M19+2:-0.27, M19+2:1.64]}{30004@}{30005@}	{30000@[y3+1:4173, y4+1:4104, y5+1:10781, y6+1:15409, y7+1:3590, y8+1:9635, y9+1:25364, y11+1:6007, y12+1:22543, y13+1:6223, y14+1:4273];[b4+1:3849];[M19+2:26632, M19+2:65950]}{30004@}{30005@}	{30000@14}{30004@0}{30005@0}		ApoA1	156	QKVQELQDK	QKVQELQDK(2)	1114.6	5.08345	{30000@[y4+1, y5+1, y6+1];[M9+2, M9+2]}{30002@[y3+1]}{30003@}	{30000@[y4+1:503.28313, y5+1:632.32554, y6+1:760.38519];[M9+2:585.31287, M9+2:601.29951]}{30002@[y3+1:390.20095]}{30003@}	{30000@[y4+1:0.00074, y5+1:0.00056, y6+1:0.00163];[M9+2:0.00239, M9+2:0.00358]}{30002@[y3+1:0.00263]}{30003@}	{30000@[y4+1:1.48, y5+1:0.89, y6+1:2.15];[M9+2:2.04, M9+2:2.99]}{30002@[y3+1:6.75]}{30003@}	{30000@[y4+1:9058, y5+1:12637, y6+1:18123];[M9+2:80006, M9+2:24340]}{30002@[y3+1:39]}{30003@}	{30000@5}{30002@1}{30003@0}		19.2042	157.998	1	2;2	4	2	3
ApoA1	ApoA1	82	223	ApoA1ApoA182223	K	K	1	W:\Collaboration_Services\Raw_files_FPL\Fusion Lumos\2021\Zheng\20211204_ZS_WP_SV_ns1_xlms\2021-12-04-10-10-24\Task1-Calibrate\20211203_ZS_WP_SV_ns1_R1-calib.mzML	27929	27877	791.415	4	3161.63	Intra	K;K		ApoA1	223	ASEQLKALGEK	ASEQLKALGEK(6)	1172.64	20.1886	{27929@[y3+1, y4+1, y5+1, y6+1, y6+1, y7+1, y8+1, y9+1];[b5+1, b6+1, b6+1, b7+1, b7+1, b8+1, b8+1, b9+1, b10+1, b10+1];[M11+2, M11+2]}{27933@[y6+1]}{27934@}	{27929@[y3+1:333.17719, y4+1:446.26105, y5+1:517.29848, y6+1:699.40237, y6+1:731.38043, y7+1:812.48745, y8+1:940.54613, y9+1:1069.58816];[b5+1:529.26167, b6+1:711.36747, b6+1:743.34028, b7+1:782.40543, b7+1:814.37805, b8+1:895.48636, b8+1:927.46042, b9+1:952.50506, b10+1:1081.55204, b10+1:1113.53119];[M11+2:614.33264, M11+2:630.31894]}{27933@[y6+1:699.40058]}{27934@}	{27929@[y3+1:0.00032, y4+1:0.00013, y5+1:0.00044, y6+1:-0.00119, y6+1:0.00478, y7+1:-0.00018, y8+1:-0.00008, y9+1:-0.00063];[b5+1:0.00001, b6+1:0.00029, b6+1:0.00102, b7+1:0.00114, b7+1:0.00168, b8+1:-0.00199, b8+1:-0.00001, b9+1:-0.00476, b10+1:-0.00037, b10+1:0.00670];[M11+2:0.00006, M11+2:0.00059]}{27933@[y6+1:-0.00298]}{27934@}	{27929@[y3+1:0.98, y4+1:0.28, y5+1:0.86, y6+1:-1.70, y6+1:6.55, y7+1:-0.22, y8+1:-0.08, y9+1:-0.59];[b5+1:0.03, b6+1:0.41, b6+1:1.37, b7+1:1.46, b7+1:2.07, b8+1:-2.23, b8+1:-0.01, b9+1:-5.00, b10+1:-0.34, b10+1:6.03];[M11+2:0.05, M11+2:0.47]}{27933@[y6+1:-4.27]}{27934@}	{27929@[y3+1:78144, y4+1:30785, y5+1:86281, y6+1:64664, y6+1:32873, y7+1:34547, y8+1:29772, y9+1:12706];[b5+1:31925, b6+1:27564, b6+1:8925, b7+1:31494, b7+1:9441, b8+1:63439, b8+1:17912, b9+1:20449, b10+1:25929, b10+1:11522];[M11+2:641743, M11+2:174065]}{27933@[y6+1:724]}{27934@}	{27929@20}{27933@1}{27934@0}		ApoA1	82	LLDNWDTLASTLSKVR	LLDNWDTLASTLSKVR(14)	1830.98	18.1564	{27929@[y2+1, y3+1, y4+1, y5+1, y8+1, y11+1, y14+2];[b4+1, b5+1, b6+1, b7+1, b8+1, b9+1, b11+1, b14+1, b15+1];[M16+2, M16+2]}{27931@[y14+1]}{27932@[y13+1]}	{27929@[y2+1:274.18760, y3+1:456.29313, y4+1:543.32455, y5+1:656.40875, y8+1:915.52389, y11+1:1244.67950, y14+2:846.40558];[b4+1:456.24641, b5+1:642.32353, b6+1:757.34895, b7+1:858.39719, b8+1:971.48432, b9+1:1042.52225, b11+1:1230.60575, b14+1:1644.78859, b15+1:1743.85811];[M16+2:943.50391, M16+2:959.49035]}{27931@[y14+1:1691.80145]}{27932@[y13+1:1544.80131]}	{27929@[y2+1:0.00024, y3+1:0.00024, y4+1:-0.00037, y5+1:-0.00024, y8+1:-0.00191, y11+1:-0.00499, y14+2:-0.00186];[b4+1:0.00114, b5+1:-0.00106, b6+1:-0.00258, b7+1:-0.00202, b8+1:0.00105, b9+1:0.00186, b11+1:0.00566, b14+1:-0.00520, b15+1:-0.00410];[M16+2:-0.00125, M16+2:-0.00045]}{27931@[y14+1:-0.00430]}{27932@[y13+1:-0.00542]}	{27929@[y2+1:0.87, y3+1:0.53, y4+1:-0.69, y5+1:-0.36, y8+1:-2.09, y11+1:-4.01, y14+2:-1.10];[b4+1:2.49, b5+1:-1.65, b6+1:-3.41, b7+1:-2.35, b8+1:1.08, b9+1:1.79, b11+1:4.60, b14+1:-3.16, b15+1:-2.35];[M16+2:-0.66, M16+2:-0.23]}{27931@[y14+1:-2.54]}{27932@[y13+1:-3.51]}	{27929@[y2+1:20154, y3+1:11829, y4+1:37163, y5+1:20450, y8+1:21492, y11+1:10435, y14+2:35752];[b4+1:9746, b5+1:18790, b6+1:8808, b7+1:11656, b8+1:26021, b9+1:29405, b11+1:14103, b14+1:14785, b15+1:26519];[M16+2:200324, M16+2:672434]}{27931@[y14+1:620]}{27932@[y13+1:32]}	{27929@18}{27931@1}{27932@1}		38.345	158.007	74	2;2	4	2	6
ApoA1	ApoA1	82	228	ApoA1ApoA182228	K	K	1	W:\Collaboration_Services\Raw_files_FPL\Fusion Lumos\2021\Zheng\20211204_ZS_WP_SV_ns1_xlms\2021-12-04-10-10-24\Task1-Calibrate\20211203_ZS_WP_SV_ns1_R1-calib.mzML	28504	28470	706.382	5	3526.88	Intra	K;K		ApoA1	82	LLDNWDTLASTLSKVR	LLDNWDTLASTLSKVR(14)	1830.98	9.06603	[y2+1, y3+1, y4+1];[b6+1, b7+1, b8+1, b9+2];[M16+2, M16+2]	[y2+1:274.18769, y3+1:456.29525, y4+1:543.32831];[b6+1:757.35165, b7+1:858.40097, b8+1:971.48289, b9+2:521.76385];[M16+2:943.50359, M16+2:959.48995]	[y2+1:0.00032, y3+1:0.00236, y4+1:0.00340];[b6+1:0.00012, b7+1:0.00176, b8+1:-0.00038, b9+2:0.00003];[M16+2:-0.00189, M16+2:-0.00126]	[y2+1:1.18, y3+1:5.18, y4+1:6.26];[b6+1:0.16, b7+1:2.05, b8+1:-0.40, b9+2:0.03];[M16+2:-1.00, M16+2:-0.66]	[y2+1:8476, y3+1:12449, y4+1:12358];[b6+1:8494, b7+1:10007, b8+1:16154, b9+2:17202];[M16+2:34863, M16+2:62642]	9		ApoA1	228	ALGEKAKPVLEDLR	ALGEKAKPVLEDLR(5)	1537.88	4.03405	{28504@[y2+1, y7+2];[M14+3, M14+3]}{28507@}{28508@[b6+1]}{28509@[b6+1]}{28510@}	{28504@[y2+1:288.20324, y7+2:421.24382];[M14+3:531.63871, M14+3:542.29584]}{28507@}{28508@[b6+1:624.33408]}{28509@[b6+1:624.33414]}{28510@}	{28504@[y2+1:0.00022, y7+2:0.00257];[M14+3:0.00094, M14+3:0.00026]}{28507@}{28508@[b6+1:-0.00107]}{28509@[b6+1:-0.00101]}{28510@}	{28504@[y2+1:0.78, y7+2:3.06];[M14+3:0.59, M14+3:0.16]}{28507@}{28508@[b6+1:-1.71]}{28509@[b6+1:-1.62]}{28510@}	{28504@[y2+1:17400, y7+2:10001];[M14+3:45236, M14+3:21554]}{28507@}{28508@[b6+1:16]}{28509@[b6+1:23]}{28510@}	{28504@4}{28507@0}{28508@1}{28509@1}{28510@0}		13.1001	158.008	29	2;2	4	2	7
NS1	ApoA1	116	261	NS1ApoA1116261	K	K	3	W:\Collaboration_Services\Raw_files_FPL\Fusion Lumos\2021\Zheng\20211204_ZS_WP_SV_ns1_xlms\2021-12-04-10-10-24\Task1-Calibrate\20211203_ZS_WP_SV_ns1_R3-calib.mzML	15235	15182	585.955	3	1754.84	Inter	K;K		NS1	116	YSWKAWGK	YSWKAWGK(4)	1024.51	10.168	{15235@[b2+1, b6+1, b6+1];[y2+1, y3+1, y4+1, y6+1, y6+1];[M8+2, M8+2]}{15240@[y2+1, y7+1]}{15241@[y2+1]}{15242@}	{15235@[b2+1:251.10228, b6+1:876.40529, b6+1:908.37780];[y2+1:204.13395, y3+1:390.21365, y4+1:461.25141, y6+1:829.43601, y6+1:861.40644];[M8+2:540.26924, M8+2:556.25513]}{15240@[y2+1:204.13353, y7+1:916.46607]}{15241@[y2+1:204.13354]}{15242@}	{15235@[b2+1:-0.00035, b6+1:0.00140, b6+1:0.00182];[y2+1:-0.00032, y3+1:0.00007, y4+1:0.00071, y6+1:0.00048, y6+1:-0.00117];[M8+2:0.00032, M8+2:0.00001]}{15240@[y2+1:-0.00074, y7+1:-0.00149]}{15241@[y2+1:-0.00073]}{15242@}	{15235@[b2+1:-1.40, b6+1:1.60, b6+1:2.01];[y2+1:-1.57, y3+1:0.18, y4+1:1.54, y6+1:0.58, y6+1:-1.36];[M8+2:0.29, M8+2:0.01]}{15240@[y2+1:-3.65, y7+1:-1.63]}{15241@[y2+1:-3.60]}{15242@}	{15235@[b2+1:7068, b6+1:4943, b6+1:5149];[y2+1:9839, y3+1:10768, y4+1:12331, y6+1:4831, y6+1:9940];[M8+2:443748, M8+2:168717]}{15240@[y2+1:326, y7+1:384]}{15241@[y2+1:137]}{15242@}	{15235@10}{15240@2}{15241@1}{15242@0}		ApoA1	261	KLNAQ	KLNAQ(1)	572.328	8.08712	[y2+1, y3+1];[b3+1, b3+1, b4+1, b4+1];[M5+1, M5+1]	[y2+1:218.11307, y3+1:332.15711];[b3+1:410.23985, b3+1:442.21159, b4+1:481.27748, b4+1:513.24889];[M5+1:627.34620, M5+1:659.31766]	[y2+1:-0.00046, y3+1:0.00065];[b3+1:0.00006, b3+1:-0.00028, b4+1:0.00057, b4+1:-0.00009];[M5+1:0.00016, M5+1:-0.00046]	[y2+1:-2.12, y3+1:1.96];[b3+1:0.15, b3+1:-0.63, b4+1:1.19, b4+1:-0.18];[M5+1:0.25, M5+1:-0.70]	[y2+1:18356, y3+1:7981];[b3+1:15282, b3+1:12845, b4+1:26630, b4+1:36612];[M5+1:81410, M5+1:152175]	8		18.2551	158.001	3	2;2	4	1	7
NS1	ApoA1	40	141	NS1ApoA140141	S	K	1	W:\Collaboration_Services\Raw_files_FPL\Fusion Lumos\2021\Zheng\20211204_ZS_WP_SV_ns1_xlms\2021-12-04-10-10-24\Task1-Calibrate\20211203_ZS_WP_SV_ns1_R1-calib.mzML	20279	20237	766.149	4	3060.57	Inter	S;K		NS1	40	FQPESPSKLASAIQK	FQPESPSKLASAIQK(7)	1629.87	11.1053	[b2+1, b5+1];[y5+1, y6+1, y7+1, y10+1, y11+1, y13+1, y13+2];[M15+2, M15+2]	[b2+1:276.13399, b5+1:589.26257];[y5+1:546.32553, y6+1:617.36372, y7+1:730.44568, y10+1:1128.61214, y11+1:1215.63514, y13+1:1409.76313, y13+2:721.37184];[M15+2:842.94884, M15+2:858.93547]	[b2+1:-0.00028, b5+1:0.00091];[y5+1:0.00095, y6+1:0.00201, y7+1:-0.00008, y10+1:0.00398, y11+1:-0.00505, y13+1:-0.00034, y13+2:0.00085];[M15+2:-0.00005, M15+2:0.00112]	[b2+1:-1.01, b5+1:1.55];[y5+1:1.73, y6+1:3.27, y7+1:-0.11, y10+1:3.53, y11+1:-4.16, y13+1:-0.24, y13+2:0.59];[M15+2:-0.03, M15+2:0.66]	[b2+1:122217, b5+1:20388];[y5+1:20818, y6+1:21635, y7+1:29266, y10+1:20491, y11+1:14918, y13+1:124657, y13+2:464840];[M15+2:168891, M15+2:352547]	11		ApoA1	141	QKVAPLGEEFR	QKVAPLGEEFR(2)	1272.68	6.09747	{20279@[y5+1, y7+1, y8+1, y9+1];[M11+2, M11+2]}{20284@[y8+1]}{20285@[y8+1, y9+1]}	{20279@[y5+1:637.29532, y7+1:847.43144, y8+1:918.46759, y9+1:1017.53805];[M11+2:664.35480, M11+2:680.34011]}{20284@[y8+1:918.46552]}{20285@[y8+1:918.46684, y9+1:1017.53352]}	{20279@[y5+1:0.00131, y7+1:0.00059, y8+1:-0.00037, y9+1:0.00167];[M11+2:0.00184, M11+2:0.00038]}{20284@[y8+1:-0.00243]}{20285@[y8+1:-0.00112, y9+1:-0.00285]}	{20279@[y5+1:2.05, y7+1:0.70, y8+1:-0.40, y9+1:1.65];[M11+2:1.39, M11+2:0.28]}{20284@[y8+1:-2.65]}{20285@[y8+1:-1.22, y9+1:-2.80]}	{20279@[y5+1:37572, y7+1:211880, y8+1:94669, y9+1:50669];[M11+2:648901, M11+2:215305]}{20284@[y8+1:473]}{20285@[y8+1:158, y9+1:345]}	{20279@6}{20284@1}{20285@2}		17.2028	158.01	12	2;2	4	5	3
NS1	ApoA1	40	141	NS1ApoA140141	S	K	2	W:\Collaboration_Services\Raw_files_FPL\Fusion Lumos\2021\Zheng\20211204_ZS_WP_SV_ns1_xlms\2021-12-04-10-10-24\Task1-Calibrate\20211203_ZS_WP_SV_ns1_R2-calib.mzML	20172	20146	766.148	4	3060.56	Inter	S;K		NS1	40	FQPESPSKLASAIQK	FQPESPSKLASAIQK(7)	1629.87	11.0739	[b2+1, b5+1];[y5+1, y6+1, y7+1, y10+1, y11+1, y13+1, y13+1];[M15+2, M15+2]	[b2+1:276.13454, b5+1:589.26260];[y5+1:546.32450, y6+1:617.36227, y7+1:730.44503, y10+1:1128.60700, y11+1:1215.63946, y13+1:1409.76105, y13+1:1441.73440];[M15+2:842.94789, M15+2:858.93414]	[b2+1:0.00027, b5+1:0.00095];[y5+1:-0.00009, y6+1:0.00057, y7+1:-0.00073, y10+1:-0.00116, y11+1:-0.00073, y13+1:-0.00242, y13+1:-0.00115];[M15+2:-0.00195, M15+2:-0.00154]	[b2+1:0.98, b5+1:1.62];[y5+1:-0.17, y6+1:0.93, y7+1:-1.01, y10+1:-1.03, y11+1:-0.60, y13+1:-1.72, y13+1:-0.80];[M15+2:-1.16, M15+2:-0.90]	[b2+1:86304, b5+1:11426];[y5+1:17304, y6+1:20928, y7+1:12523, y10+1:15796, y11+1:12546, y13+1:73558, y13+1:72586];[M15+2:105162, M15+2:213303]	11		ApoA1	141	QKVAPLGEEFR	QKVAPLGEEFR(2)	1272.68	6.0509	{20172@[y5+1, y7+1, y8+1, y9+1];[M11+1, M11+2]}{20174@[y8+1, y9+1]}{20175@[y9+1]}	{20172@[y5+1:637.29361, y7+1:847.43094, y8+1:918.46711, y9+1:1017.53409];[M11+1:1327.69976, M11+2:680.33924]}{20174@[y8+1:918.46523, y9+1:1017.53190]}{20175@[y9+1:1017.53325]}	{20172@[y5+1:-0.00041, y7+1:0.00009, y8+1:-0.00085, y9+1:-0.00228];[M11+1:-0.00071, M11+2:-0.00135]}{20174@[y8+1:-0.00272, y9+1:-0.00447]}{20175@[y9+1:-0.00312]}	{20172@[y5+1:-0.64, y7+1:0.11, y8+1:-0.92, y9+1:-2.24];[M11+1:-0.53, M11+2:-1.00]}{20174@[y8+1:-2.97, y9+1:-4.39]}{20175@[y9+1:-3.07]}	{20172@[y5+1:29685, y7+1:132515, y8+1:54551, y9+1:27124];[M11+1:46294, M11+2:151862]}{20174@[y8+1:660, y9+1:861]}{20175@[y9+1:62]}	{20172@6}{20174@2}{20175@1}		17.1248	158.006	8	2;2	4	4	14
NS1	ApoA1	40	63	NS1ApoA14063	K	S	1	W:\Collaboration_Services\Raw_files_FPL\Fusion Lumos\2021\Zheng\20211204_ZS_WP_SV_ns1_xlms\2021-12-04-10-10-24\Task1-Calibrate\20211203_ZS_WP_SV_ns1_R1-calib.mzML	28432	28391	946.489	4	3781.93	Inter	K;S		ApoA1	63	DYVAQFEASALGKQLNLK	DYVAQFEASALGKQLNLK(13)	1994.05	31.0934	[b2+1, b3+1, b4+1, b5+1, b6+1, b7+1, b8+1, b9+1, b11+1, b12+1, b15+1, b15+1];[y3+1, y4+1, y5+1, y7+1, y7+1, y8+1, y8+1, y10+1, y11+1, y12+1, y13+1, y13+1, y14+1, y15+1, y15+1, y16+1, y16+2];[M18+2, M18+2]	[b2+1:279.09814, b3+1:378.16685, b4+1:449.20459, b5+1:577.26138, b6+1:724.33047, b7+1:853.37207, b8+1:924.40868, b9+1:1011.44727, b11+1:1195.56097, b12+1:1252.58613, b15+1:1675.82926, b15+1:1707.81371];[y3+1:374.24076, y4+1:487.32425, y5+1:615.38339, y7+1:854.51012, y7+1:886.48363, y8+1:967.59302, y8+1:999.57134, y10+1:1125.66185, y11+1:1196.70521, y12+1:1325.74363, y13+1:1472.81807, y13+1:1504.7…	[b2+1:0.00060, b3+1:0.00089, b4+1:0.00152, b5+1:-0.00027, b6+1:0.00041, b7+1:-0.00059, b8+1:-0.00109, b9+1:0.00547, b11+1:-0.00201, b12+1:0.00168, b15+1:-0.00335, b15+1:0.00902];[y3+1:0.00096, y4+1:0.00040, y5+1:0.00096, y7+1:0.00070, y7+1:0.00212, y8+1:-0.00047, y8+1:0.00577, y10+1:-0.00078, y11+1:0.00547, y12+1:0.00129, y13+1:0.00732, y13+1:-0.00314, y14+1:0.00256, y15+1:-0.00596, y15+1:0.00208…	[b2+1:2.14, b3+1:2.35, b4+1:3.39, b5+1:-0.47, b6+1:0.56, b7+1:-0.70, b8+1:-1.18, b9+1:5.41, b11+1:-1.68, b12+1:1.35, b15+1:-2.00, b15+1:5.29];[y3+1:2.57, y4+1:0.81, y5+1:1.56, y7+1:0.82, y7+1:2.40, y8+1:-0.49, y8+1:5.78, y10+1:-0.69, y11+1:4.57, y12+1:0.98, y13+1:4.98, y13+1:-2.09, y14+1:1.60, y15+1:-3.57, y15+1:1.22, y16+1:4.88, y16+2:5.70];[M18+2:0.44, M18+2:-0.36]	[b2+1:14801, b3+1:27934, b4+1:13476, b5+1:11932, b6+1:22212, b7+1:13990, b8+1:18373, b9+1:39632, b11+1:45754, b12+1:19156, b15+1:8846, b15+1:9567];[y3+1:10672, y4+1:22335, y5+1:26568, y7+1:35397, y7+1:31080, y8+1:11136, y8+1:12982, y10+1:13345, y11+1:9145, y12+1:13017, y13+1:14825, y13+1:11633, y14+1:9487, y15+1:20126, y15+1:15050, y16+1:9232, y16+2:9866];[M18+2:122072, M18+2:97008]	31		NS1	40	FQPESPSKLASAIQK	FQPESPSKLASAIQK(7)	1629.87	9.1029	{28432@[b2+1, b5+1];[y5+1, y6+1, y7+1, y13+2, y13+2];[M15+2, M15+2]}{28434@[b2+1, b13+1];[y11+1]}{28435@[b2+1];[y13+1]}{28436@[b2+1];[y10+1, y13+1]}{28437@[y11+1]}	{28432@[b2+1:276.13519, b5+1:589.26000];[y5+1:546.32579, y6+1:617.36326, y7+1:730.44767, y13+2:705.38605, y13+2:721.37215];[M15+2:842.94948, M15+2:858.93559]}{28434@[b2+1:276.13380, b13+1:1410.73573];[y11+1:1183.66724]}{28435@[b2+1:276.13380];[y13+1:1441.73579]}{28436@[b2+1:276.13380];[y10+1:1128.60049, y13+1:1441.73437]}{28437@[y11+1:1183.66857]}	{28432@[b2+1:0.00092, b5+1:-0.00165];[y5+1:0.00120, y6+1:0.00155, y7+1:0.00190, y13+2:0.00136, y13+2:0.00147];[M15+2:0.00123, M15+2:0.00137]}{28434@[b2+1:-0.00047, b13+1:0.00938];[y11+1:-0.00087]}{28435@[b2+1:-0.00047];[y13+1:0.00024]}{28436@[b2+1:-0.00047];[y10+1:-0.00767, y13+1:-0.00117]}{28437@[y11+1:0.00046]}	{28432@[b2+1:3.34, b5+1:-2.81];[y5+1:2.20, y6+1:2.52, y7+1:2.61, y13+2:0.97, y13+2:1.02];[M15+2:0.73, M15+2:0.80]}{28434@[b2+1:-1.71, b13+1:6.65];[y11+1:-0.74]}{28435@[b2+1:-1.71];[y13+1:0.17]}{28436@[b2+1:-1.70];[y10+1:-6.80, y13+1:-0.81]}{28437@[y11+1:0.39]}	{28432@[b2+1:14708, b5+1:11948];[y5+1:13351, y6+1:19456, y7+1:15675, y13+2:140209, y13+2:157003];[M15+2:219466, M15+2:223855]}{28434@[b2+1:593, b13+1:493];[y11+1:378]}{28435@[b2+1:115];[y13+1:257]}{28436@[b2+1:943];[y10+1:439, y13+1:508]}{28437@[y11+1:387]}	{28432@9}{28434@3}{28435@2}{28436@3}{28437@1}		40.1963	158.006	8	2;2	4	6	3
NS1	ApoA1	40	63	NS1ApoA14063	K	S	2	W:\Collaboration_Services\Raw_files_FPL\Fusion Lumos\2021\Zheng\20211204_ZS_WP_SV_ns1_xlms\2021-12-04-10-10-24\Task1-Calibrate\20211203_ZS_WP_SV_ns1_R2-calib.mzML	28304	28290	946.488	4	3781.92	Inter	K;S		ApoA1	63	DYVAQFEASALGKQLNLK	DYVAQFEASALGKQLNLK(13)	1994.05	29.1005	[b2+1, b3+1, b4+1, b5+1, b6+1, b7+1, b8+1, b9+1, b10+1, b11+1, b12+1, b13+1, b15+1];[y3+1, y4+1, y5+1, y7+1, y7+1, y8+1, y8+1, y10+1, y10+1, y12+1, y13+1, y15+1, y15+1, y16+1];[M18+2, M18+2]	[b2+1:279.09762, b3+1:378.16632, b4+1:449.20246, b5+1:577.26345, b6+1:724.32959, b7+1:853.37031, b8+1:924.40887, b9+1:1011.44373, b10+1:1082.48346, b11+1:1195.56236, b12+1:1252.59028, b13+1:1434.68643, b15+1:1675.84422];[y3+1:374.24080, y4+1:487.32514, y5+1:615.38278, y7+1:854.50862, y7+1:886.48474, y8+1:967.59504, y8+1:999.56408, y10+1:1125.66199, y10+1:1157.63005, y12+1:1325.73321, y13+1:1472.8…	[b2+1:0.00007, b3+1:0.00035, b4+1:-0.00061, b5+1:0.00180, b6+1:-0.00048, b7+1:-0.00235, b8+1:-0.00090, b9+1:0.00193, b10+1:0.00454, b11+1:-0.00062, b12+1:0.00584, b13+1:-0.00354, b15+1:0.01161];[y3+1:0.00101, y4+1:0.00128, y5+1:0.00034, y7+1:-0.00081, y7+1:0.00323, y8+1:0.00155, y8+1:-0.00149, y10+1:-0.00064, y10+1:-0.00466, y12+1:-0.00912, y13+1:-0.00676, y15+1:-0.00134, y15+1:0.00102, y16+1:-0.…	[b2+1:0.27, b3+1:0.94, b4+1:-1.36, b5+1:3.12, b6+1:-0.66, b7+1:-2.75, b8+1:-0.97, b9+1:1.91, b10+1:4.20, b11+1:-0.52, b12+1:4.66, b13+1:-2.47, b15+1:6.93];[y3+1:2.70, y4+1:2.64, y5+1:0.56, y7+1:-0.95, y7+1:3.65, y8+1:1.60, y8+1:-1.49, y10+1:-0.57, y10+1:-4.03, y12+1:-6.89, y13+1:-4.59, y15+1:-0.80, y15+1:0.60, y16+1:-2.42];[M18+2:-0.81, M18+2:-1.09]	[b2+1:8872, b3+1:26893, b4+1:8909, b5+1:6725, b6+1:12956, b7+1:17284, b8+1:11957, b9+1:28119, b10+1:10738, b11+1:45770, b12+1:15401, b13+1:10293, b15+1:9352];[y3+1:12409, y4+1:8833, y5+1:29739, y7+1:21341, y7+1:29357, y8+1:14593, y8+1:6906, y10+1:15226, y10+1:20271, y12+1:11536, y13+1:13724, y15+1:24268, y15+1:8022, y16+1:14806];[M18+2:107790, M18+2:88064]	29		NS1	40	FQPESPSKLASAIQK	FQPESPSKLASAIQK(7)	1629.87	11.0913	{28304@[b2+1, b5+1];[y5+1, y6+1, y7+1, y10+1, y10+1, y13+2, y13+1];[M15+2, M15+2]}{28306@[y10+1, y13+1]}{28307@[b2+1, b13+1];[y11+1]}{28308@[b2+1];[y11+1]}{28309@[b2+1];[y10+1]}	{28304@[b2+1:276.13479, b5+1:589.26103];[y5+1:546.32432, y6+1:617.36043, y7+1:730.44142, y10+1:1096.63899, y10+1:1128.60465, y13+2:705.38557, y13+1:1441.73529];[M15+2:842.94883, M15+2:858.93466]}{28306@[y10+1:1128.60177, y13+1:1441.73418]}{28307@[b2+1:276.13374, b13+1:1410.73540];[y11+1:1183.66840]}{28308@[b2+1:276.13376];[y11+1:1183.66708]}{28309@[b2+1:276.13376];[y10+1:1128.60177]}	{28304@[b2+1:0.00052, b5+1:-0.00063];[y5+1:-0.00027, y6+1:-0.00127, y7+1:-0.00435, y10+1:0.00291, y10+1:-0.00351, y13+2:0.00039, y13+1:-0.00025];[M15+2:-0.00008, M15+2:-0.00049]}{28306@[y10+1:-0.00639, y13+1:-0.00137]}{28307@[b2+1:-0.00052, b13+1:0.00905];[y11+1:0.00029]}{28308@[b2+1:-0.00051];[y11+1:-0.00103]}{28309@[b2+1:-0.00051];[y10+1:-0.00639]}	{28304@[b2+1:1.89, b5+1:-1.07];[y5+1:-0.50, y6+1:-2.06, y7+1:-5.96, y10+1:2.66, y10+1:-3.11, y13+2:0.28, y13+1:-0.18];[M15+2:-0.05, M15+2:-0.29]}{28306@[y10+1:-5.67, y13+1:-0.95]}{28307@[b2+1:-1.91, b13+1:6.42];[y11+1:0.25]}{28308@[b2+1:-1.84];[y11+1:-0.87]}{28309@[b2+1:-1.84];[y10+1:-5.67]}	{28304@[b2+1:11454, b5+1:8989];[y5+1:12008, y6+1:16240, y7+1:8400, y10+1:8263, y10+1:12371, y13+2:126004, y13+1:41125];[M15+2:142199, M15+2:194445]}{28306@[y10+1:208, y13+1:181]}{28307@[b2+1:130, b13+1:177];[y11+1:116]}{28308@[b2+1:306];[y11+1:215]}{28309@[b2+1:221];[y10+1:145]}	{28304@11}{28306@2}{28307@3}{28308@2}{28309@2}		40.1919	158.004	9	2;2	4	9	58
NS1	ApoA1	7	63	NS1ApoA1763	K	S	1	W:\Collaboration_Services\Raw_files_FPL\Fusion Lumos\2021\Zheng\20211204_ZS_WP_SV_ns1_xlms\2021-12-04-10-10-24\Task1-Calibrate\20211203_ZS_WP_SV_ns1_R1-calib.mzML	28567	28534	858.672	4	3430.66	Inter	K;S		ApoA1	63	DYVAQFEASALGKQLNLK	DYVAQFEASALGKQLNLK(13)	1994.05	15.1187	{28567@[b2+1, b3+1, b4+1, b6+1, b10+1, b11+1];[y3+1, y4+1, y5+1, y7+1, y8+1, y10+1, y16+2];[M18+2, M18+2]}{28570@}{28571@[y12+1]}	{28567@[b2+1:279.09810, b3+1:378.16566, b4+1:449.20087, b6+1:724.33186, b10+1:1082.47475, b11+1:1195.56245];[y3+1:374.24102, y4+1:487.32525, y5+1:615.38298, y7+1:886.48711, y8+1:967.59104, y10+1:1157.63208, y16+2:901.97745];[M18+2:1025.03712, M18+2:1041.02063]}{28570@}{28571@[y12+1:1325.73522]}	{28567@[b2+1:0.00055, b3+1:-0.00030, b4+1:-0.00221, b6+1:0.00180, b10+1:-0.00417, b11+1:-0.00053];[y3+1:0.00123, y4+1:0.00139, y5+1:0.00055, y7+1:0.00561, y8+1:-0.00244, y10+1:-0.00263, y16+2:0.00069];[M18+2:0.00185, M18+2:-0.00323]}{28570@}{28571@[y12+1:-0.00712]}	{28567@[b2+1:1.98, b3+1:-0.81, b4+1:-4.92, b6+1:2.48, b10+1:-3.86, b11+1:-0.44];[y3+1:3.28, y4+1:2.86, y5+1:0.89, y7+1:6.33, y8+1:-2.53, y10+1:-2.28, y16+2:0.38];[M18+2:0.90, M18+2:-1.55]}{28570@}{28571@[y12+1:-5.37]}	{28567@[b2+1:25995, b3+1:23229, b4+1:9527, b6+1:14401, b10+1:9241, b11+1:24638];[y3+1:11744, y4+1:21460, y5+1:22163, y7+1:53098, y8+1:12436, y10+1:10253, y16+2:15827];[M18+2:31133, M18+2:114641]}{28570@}{28571@[y12+1:70]}	{28567@15}{28570@0}{28571@1}		NS1	7	DSGCVVSWKNK	DSGC[Common Fixed:Carbamidomethyl on C]VVSWKNK(7)	1278.6	8.06836	{28567@[y2+1, y5+1, y5+1, y6+1];[b5+1, b6+1];[M11+2, M11+2]}{28572@}	{28567@[y2+1:261.15578, y5+1:716.36939, y5+1:748.34807, y6+1:815.44008];[b5+1:519.18827, b6+1:618.25542];[M11+2:667.31390, M11+2:683.30044]}{28572@}	{28567@[y2+1:0.00005, y5+1:-0.00321, y5+1:0.00339, y6+1:-0.00093];[b5+1:0.00150, b6+1:0.00024];[M11+2:0.00002, M11+2:0.00102]}{28572@}	{28567@[y2+1:0.20, y5+1:-4.48, y5+1:4.54, y6+1:-1.14];[b5+1:2.89, b6+1:0.38];[M11+2:0.01, M11+2:0.75]}{28572@}	{28567@[y2+1:5911, y5+1:23193, y5+1:19443, y6+1:19695];[b5+1:11545, b6+1:28152];[M11+2:91639, M11+2:30626]}{28572@}	{28567@8}{28572@0}		23.1871	158.008	3	2;2	4	7	5
NS1	ApoA1	7	63	NS1ApoA1763	K	S	3	W:\Collaboration_Services\Raw_files_FPL\Fusion Lumos\2021\Zheng\20211204_ZS_WP_SV_ns1_xlms\2021-12-04-10-10-24\Task1-Calibrate\20211203_ZS_WP_SV_ns1_R3-calib.mzML	25784	25750	962.467	4	3845.84	Inter	K;S		ApoA1	63	DSGRDYVAQFEASALGKQLNLK	DSGRDYVAQFEASALGKQLNLK(17)	2409.23	8.13692	{25784@[y5+1, y7+1, y7+1, y8+1];[b7+1, b15+2];[M22+2, M22+2]}{25788@}{25789@}{25790@[b18+1]}{25791@[b12+1]}	{25784@[y5+1:615.38465, y7+1:854.50858, y7+1:886.47988, y8+1:967.59333];[b7+1:793.34635, b15+2:805.87516];[M22+2:1232.62363, M22+2:1248.60913]}{25788@}{25789@}{25790@[b18+1:1977.93448]}{25791@[b12+1:1339.59935]}	{25784@[y5+1:0.00221, y7+1:-0.00085, y7+1:-0.00162, y8+1:-0.00016];[b7+1:-0.00116, b15+2:-0.00149];[M22+2:-0.00669, M22+2:-0.00777]}{25788@}{25789@}{25790@[b18+1:0.00439]}{25791@[b12+1:0.00803]}	{25784@[y5+1:3.60, y7+1:-0.99, y7+1:-1.83, y8+1:-0.17];[b7+1:-1.46, b15+2:-0.93];[M22+2:-2.72, M22+2:-3.11]}{25788@}{25789@}{25790@[b18+1:2.22]}{25791@[b12+1:6.00]}	{25784@[y5+1:5629, y7+1:12805, y7+1:9564, y8+1:5910];[b7+1:5533, b15+2:10324];[M22+2:35993, M22+2:41853]}{25788@}{25789@}{25790@[b18+1:12]}{25791@[b12+1:32]}	{25784@8}{25788@0}{25789@0}{25790@1}{25791@1}		NS1	7	DSGCVVSWKNK	DSGC[Common Fixed:Carbamidomethyl on C]VVSWKNK(7)	1278.6	7.0938	[b5+1, b6+1];[y5+1, y6+1, y6+1];[M11+1, M11+1]	[b5+1:519.18648, b6+1:618.25489];[y5+1:716.37182, y6+1:815.44499, y6+1:847.41181];[M11+1:1333.61732, M11+1:1365.59086]	[b5+1:-0.00029, b6+1:-0.00030];[y5+1:-0.00077, y6+1:0.00399, y6+1:-0.00128];[M11+1:-0.00319, M11+1:-0.00173]	[b5+1:-0.56, b6+1:-0.48];[y5+1:-1.08, y6+1:4.89, y6+1:-1.51];[M11+1:-2.39, M11+1:-1.26]	[b5+1:3462, b6+1:5293];[y5+1:12934, y6+1:6385, y6+1:3770];[M11+1:29687, M11+1:25888]	7		15.2307	158.007	26	2;2	4	1	4
NS1	ApoA1	94	141	NS1ApoA194141	K	K	1	W:\Collaboration_Services\Raw_files_FPL\Fusion Lumos\2021\Zheng\20211204_ZS_WP_SV_ns1_xlms\2021-12-04-10-10-24\Task1-Calibrate\20211203_ZS_WP_SV_ns1_R1-calib.mzML	25019	24945	782.143	4	3124.54	Inter	K;K		NS1	94	MTIMTGDIKGIMQAGK	MTIMTGDIKGIMQAGK(9)	1693.86	27.1327	{25019@[b3+1, b4+1, b5+1, b8+1, b9+1, b9+1, b11+1, b11+1, b13+1];[y3+1, y4+1, y5+1, y6+1, y7+1, y8+1, y9+1, y10+1, y11+1, y11+1, y12+1, y12+1, y13+1, y13+1, y14+1, y14+1];[M16+2, M16+2]}{25023@[y2+1, y5+1, y13+1]}{25024@}	{25019@[b3+1:346.17902, b4+1:477.21987, b5+1:578.26698, b8+1:863.39885, b9+1:1045.50693, b9+1:1077.48049, b11+1:1215.60940, b11+1:1247.58065, b13+1:1506.68321];[y3+1:275.17154, y4+1:403.22972, y5+1:534.27010, y6+1:647.35247, y7+1:704.37557, y8+1:886.47919, y9+1:1031.53451, y10+1:1146.56155, y11+1:1171.61566, y11+1:1203.58724, y12+1:1272.66321, y12+1:1304.63228, y13+1:1403.70229, y13+1:1435.67157,…	{25019@[b3+1:-0.00048, b4+1:-0.00012, b5+1:-0.00069, b8+1:-0.00128, b9+1:0.00126, b9+1:0.00275, b11+1:-0.00179, b11+1:-0.00262, b13+1:0.00087];[y3+1:0.00016, y4+1:-0.00024, y5+1:-0.00034, y6+1:-0.00204, y7+1:-0.00040, y8+1:-0.00231, y9+1:-0.00313, y10+1:-0.00303, y11+1:0.00169, y11+1:0.00119, y12+1:0.00156, y12+1:-0.00144, y13+1:0.00017, y13+1:-0.00264, y14+1:-0.00201, y14+1:-0.00347];[M16+2:-0.0…	{25019@[b3+1:-1.39, b4+1:-0.25, b5+1:-1.19, b8+1:-1.49, b9+1:1.21, b9+1:2.55, b11+1:-1.47, b11+1:-2.10, b13+1:0.58];[y3+1:0.57, y4+1:-0.61, y5+1:-0.65, y6+1:-3.15, y7+1:-0.57, y8+1:-2.60, y9+1:-3.04, y10+1:-2.65, y11+1:1.44, y11+1:0.99, y12+1:1.23, y12+1:-1.11, y13+1:0.12, y13+1:-1.84, y14+1:-1.32, y14+1:-2.24];[M16+2:-0.44, M16+2:-0.27]}{25023@[y2+1:-4.06, y5+1:-6.53, y13+1:-5.69]}{25024@}	{25019@[b3+1:14168, b4+1:11703, b5+1:16085, b8+1:14705, b9+1:9749, b9+1:17802, b11+1:11562, b11+1:12542, b13+1:8484];[y3+1:9299, y4+1:18648, y5+1:133414, y6+1:11188, y7+1:103342, y8+1:14197, y9+1:8399, y10+1:11725, y11+1:19458, y11+1:29667, y12+1:17940, y12+1:25090, y13+1:25857, y13+1:16356, y14+1:17935, y14+1:11947];[M16+2:113330, M16+2:238263]}{25023@[y2+1:402, y5+1:67, y13+1:106]}{25024@}	{25019@27}{25023@3}{25024@0}		ApoA1	141	QKVAPLGEEFR	QKVAPLGEEFR(2)	1272.68	9.1535	{25019@[y2+1, y5+1, y7+1, y8+1, y9+1];[b3+1, b4+1];[M11+2, M11+2]}{25021@[y8+1]}{25022@[y9+1]}	{25019@[y2+1:322.18725, y5+1:637.29492, y7+1:847.43038, y8+1:918.46456, y9+1:1017.53553];[b3+1:442.21176, b4+1:481.27730];[M11+2:664.35392, M11+2:680.33952]}{25021@[y8+1:918.46576]}{25022@[y9+1:1017.53381]}	{25019@[y2+1:-0.00012, y5+1:0.00091, y7+1:-0.00046, y8+1:-0.00340, y9+1:-0.00084];[b3+1:-0.00011, b4+1:0.00040];[M11+2:0.00010, M11+2:-0.00079]}{25021@[y8+1:-0.00220]}{25022@[y9+1:-0.00256]}	{25019@[y2+1:-0.36, y5+1:1.43, y7+1:-0.55, y8+1:-3.71, y9+1:-0.83];[b3+1:-0.25, b4+1:0.83];[M11+2:0.07, M11+2:-0.58]}{25021@[y8+1:-2.40]}{25022@[y9+1:-2.52]}	{25019@[y2+1:8753, y5+1:36945, y7+1:203530, y8+1:86235, y9+1:47269];[b3+1:8833, b4+1:11329];[M11+2:484085, M11+2:203771]}{25021@[y8+1:554]}{25022@[y9+1:1298]}	{25019@9}{25021@1}{25022@1}		36.2862	158.003	12	2;2	4	12	1
NS1	ApoA1	94	141	NS1ApoA194141	K	K	3	W:\Collaboration_Services\Raw_files_FPL\Fusion Lumos\2021\Zheng\20211204_ZS_WP_SV_ns1_xlms\2021-12-04-10-10-24\Task1-Calibrate\20211203_ZS_WP_SV_ns1_R3-calib.mzML	24219	24164	782.143	4	3124.54	Inter	K;K		NS1	94	MTIMTGDIKGIMQAGK	MTIMTGDIKGIMQAGK(9)	1693.86	5.09289	{24219@[y5+1, y7+1, y8+1];[M16+2, M16+2]}{24226@[y2+1]}{24227@}	{24219@[y5+1:534.27065, y7+1:704.37735, y8+1:918.45775];[M16+2:874.93967, M16+2:890.92487]}{24226@[y2+1:204.13366]}{24227@}	{24219@[y5+1:0.00020, y7+1:0.00138, y8+1:0.00418];[M16+2:-0.00229, M16+2:-0.00397]}{24226@[y2+1:-0.00061]}{24227@}	{24219@[y5+1:0.38, y7+1:1.96, y8+1:4.55];[M16+2:-1.31, M16+2:-2.23]}{24226@[y2+1:-3.01]}{24227@}	{24219@[y5+1:24392, y7+1:16492, y8+1:12874];[M16+2:18552, M16+2:40752]}{24226@[y2+1:11]}{24227@}	{24219@5}{24226@1}{24227@0}		ApoA1	141	QKVAPLGEEFR	QKVAPLGEEFR(2)	1272.68	4.13775	{24219@[y5+1, y7+1];[M11+2, M11+2]}{24224@[y8+1]}{24225@[y9+1]}	{24219@[y5+1:637.29448, y7+1:847.42971];[M11+2:664.35379, M11+2:680.33904]}{24224@[y8+1:918.46672]}{24225@[y9+1:1017.53490]}	{24219@[y5+1:0.00047, y7+1:-0.00113];[M11+2:-0.00017, M11+2:-0.00174]}{24224@[y8+1:-0.00123]}{24225@[y9+1:-0.00147]}	{24219@[y5+1:0.74, y7+1:-1.34];[M11+2:-0.13, M11+2:-1.28]}{24224@[y8+1:-1.35]}{24225@[y9+1:-1.44]}	{24219@[y5+1:9560, y7+1:33555];[M11+2:78595, M11+2:45958]}{24224@[y8+1:337]}{24225@[y9+1:45]}	{24219@4}{24224@1}{24225@1}		9.23064	158.006	39	2;2	4	15	4
NS1	NS1	101	109	NS1NS1101109	T	K	1	W:\Collaboration_Services\Raw_files_FPL\Fusion Lumos\2021\Zheng\20211204_ZS_WP_SV_ns1_xlms\2021-12-04-10-10-24\Task1-Calibrate\20211203_ZS_WP_SV_ns1_R1-calib.mzML	19402	19378	674.538	5	3367.65	Intra	T;K		NS1	109	SLRPQPTELKYSWKAWGK	SLRPQPTELKYSWK[DSSO:DSSO_hydro_K on K]AWGK(7)	2350.18	12.0574	[y2+1, y3+1, y4+1, y5+1, y6+1, y7+1];[b5+1, b8+1, b10+2, b11+2];[M18+3, M18+3]	[y2+1:204.13482, y3+1:390.21429, y4+1:461.25090, y5+1:765.35940, y6+1:951.44526, y7+1:1038.47476];[b5+1:582.33666, b8+1:963.48416, b10+2:602.83762, b11+2:684.37065];[M18+3:802.40310, M18+3:813.06131]	[y2+1:0.00056, y3+1:0.00071, y4+1:0.00020, y5+1:-0.00056, y6+1:0.00599, y7+1:0.00346];[b5+1:0.00084, b8+1:-0.00526, b10+2:-0.00048, b11+2:0.00225];[M18+3:-0.00104, M18+3:0.00150]	[y2+1:2.73, y3+1:1.82, y4+1:0.44, y5+1:-0.73, y6+1:6.30, y7+1:3.33];[b5+1:1.44, b8+1:-5.46, b10+2:-0.40, b11+2:1.65];[M18+3:-0.43, M18+3:0.61]	[y2+1:12284, y3+1:68789, y4+1:40245, y5+1:10509, y6+1:13609, y7+1:16973];[b5+1:15102, b8+1:17408, b10+2:36544, b11+2:18372];[M18+3:68110, M18+3:54437]	12		NS1	101	GIMQAGKR	GIMQAGKR(7)	859.47	9.07312	{19402@[b3+1, b5+1];[y3+1, y4+1, y5+1, y6+2, y6+1];[M8+2, M8+2]}{19407@}{19408@}	{19402@[b3+1:302.15336, b5+1:501.24846];[y3+1:414.24719, y4+1:485.28328, y5+1:645.31484, y6+2:372.69493, y6+1:776.35087];[M8+2:457.74753, M8+2:473.73386]}{19407@}{19408@}	{19402@[b3+1:0.00007, b5+1:-0.00052];[y3+1:0.00126, y4+1:0.00023, y5+1:0.00113, y6+2:0.00047, y6+1:-0.00332];[M8+2:0.00014, M8+2:0.00072]}{19407@}{19408@}	{19402@[b3+1:0.24, b5+1:-1.04];[y3+1:3.04, y4+1:0.48, y5+1:1.76, y6+2:0.63, y6+1:-4.28];[M8+2:0.15, M8+2:0.76]}{19407@}{19408@}	{19402@[b3+1:11799, b5+1:24317];[y3+1:30317, y4+1:23576, y5+1:15011, y6+2:51753, y6+1:13909];[M8+2:203843, M8+2:100270]}{19407@}{19408@}	{19402@9}{19407@0}{19408@0}		21.1305	158.004	38	2;2	4	9	2
NS1	NS1	101	109	NS1NS1101109	K	T	3	W:\Collaboration_Services\Raw_files_FPL\Fusion Lumos\2021\Zheng\20211204_ZS_WP_SV_ns1_xlms\2021-12-04-10-10-24\Task1-Calibrate\20211203_ZS_WP_SV_ns1_R3-calib.mzML	12003	11992	692.357	4	2765.4	Intra	K;T		NS1	101	GIMQAGKR	GIM[Common Variable:Oxidation on M]QAGKR(7)	875.465	10.1357	{12003@[b3+1, b5+1, b7+1];[y3+1, y4+1, y5+1, y6+2, y6+1];[M8+2, M8+2]}{12007@}{12008@}	{12003@[b3+1:318.14883, b5+1:517.24498, b7+1:756.37122];[y3+1:414.24606, y4+1:485.28371, y5+1:613.34215, y6+2:380.69271, y6+1:792.35197];[M8+2:465.74512, M8+2:481.73141]}{12007@}{12008@}	{12003@[b3+1:0.00063, b5+1:0.00108, b7+1:0.00033];[y3+1:0.00012, y4+1:0.00066, y5+1:0.00051, y6+2:0.00112, y6+1:0.00286];[M8+2:0.00041, M8+2:0.00091]}{12007@}{12008@}	{12003@[b3+1:1.98, b5+1:2.10, b7+1:0.44];[y3+1:0.29, y4+1:1.36, y5+1:0.84, y6+2:1.47, y6+1:3.61];[M8+2:0.44, M8+2:0.95]}{12007@}{12008@}	{12003@[b3+1:9633, b5+1:18013, b7+1:7831];[y3+1:25376, y4+1:13191, y5+1:25806, y6+2:48641, y6+1:4683];[M8+2:149824, M8+2:36927]}{12007@}{12008@}	{12003@10}{12007@0}{12008@0}		NS1	109	SLRPQPTELKYSWK	SLRPQPTELKYSWK(7)	1731.93	4.11713	{12003@[y4+1];[b5+1];[M14+3, M14+2]}{12005@[b5+1]}{12006@[b10+1];[y11+1]}	{12003@[y4+1:583.28559];[b5+1:582.33814];[M14+3:596.32177, M14+2:909.96549]}{12005@[b5+1:582.33397]}{12006@[b10+1:1204.66642];[y11+1:1430.73475]}	{12003@[y4+1:-0.00189];[b5+1:0.00231];[M14+3:0.00212, M14+2:0.00299]}{12005@[b5+1:-0.00186]}{12006@[b10+1:-0.00203];[y11+1:0.00331]}	{12003@[y4+1:-3.24];[b5+1:3.98];[M14+3:1.18, M14+2:1.64]}{12005@[b5+1:-3.19]}{12006@[b10+1:-1.68];[y11+1:2.31]}	{12003@[y4+1:4813];[b5+1:3880];[M14+3:11873, M14+2:272801]}{12005@[b5+1:102]}{12006@[b10+1:79];[y11+1:85]}	{12003@4}{12005@1}{12006@2}		14.2528	158.004	25	2;2	4	3	1
NS1	NS1	101	112	NS1NS1101112	K	K	1	W:\Collaboration_Services\Raw_files_FPL\Fusion Lumos\2021\Zheng\20211204_ZS_WP_SV_ns1_xlms\2021-12-04-10-10-24\Task1-Calibrate\20211203_ZS_WP_SV_ns1_R1-calib.mzML	12498	12490	554.087	5	2765.4	Intra	K;K		NS1	112	SLRPQPTELKYSWK	SLRPQPTELKYSWK(10)	1731.93	13.0461	{12498@[b2+1, b3+1, b5+1, b7+2, b9+2];[y2+1, y3+1, y4+1, y5+1, y6+1, y7+1];[M14+3, M14+3]}{12503@[b5+1]}{12504@}	{12498@[b2+1:201.12351, b3+1:357.22517, b5+1:582.33486, b7+2:390.72191, b9+2:511.78468];[y2+1:333.19165, y3+1:420.22418, y4+1:583.28853, y5+1:765.39193, y6+1:878.47546, y7+1:1007.52029];[M14+3:596.32048, M14+3:606.97914]}{12503@[b5+1:582.33352]}{12504@}	{12498@[b2+1:0.00015, b3+1:0.00069, b5+1:-0.00097, b7+2:0.00028, b9+2:-0.00083];[y2+1:-0.00047, y3+1:0.00003, y4+1:0.00106, y5+1:-0.00106, y6+1:-0.00160, y7+1:0.00063];[M14+3:-0.00177, M14+3:0.00215]}{12503@[b5+1:-0.00230]}{12504@}	{12498@[b2+1:0.73, b3+1:1.92, b5+1:-1.66, b7+2:0.36, b9+2:-0.81];[y2+1:-1.41, y3+1:0.07, y4+1:1.81, y5+1:-1.39, y6+1:-1.82, y7+1:0.63];[M14+3:-0.99, M14+3:1.18]}{12503@[b5+1:-3.96]}{12504@}	{12498@[b2+1:5185, b3+1:7788, b5+1:18223, b7+2:26235, b9+2:10847];[y2+1:4436, y3+1:6420, y4+1:20596, y5+1:7906, y6+1:5045, y7+1:5811];[M14+3:65462, M14+3:15940]}{12503@[b5+1:180]}{12504@}	{12498@13}{12503@1}{12504@0}		NS1	101	GIMQAGKR	GIM[Common Variable:Oxidation on M]QAGKR(7)	875.465	6.07457	[b3+1, b5+1];[y3+1, y6+2];[M8+2, M8+2]	[b3+1:318.14843, b5+1:517.24575];[y3+1:414.24548, y6+2:396.67871];[M8+2:465.74482, M8+2:481.73047]	[b3+1:0.00023, b5+1:0.00185];[y3+1:-0.00046, y6+2:0.00104];[M8+2:-0.00020, M8+2:-0.00097]	[b3+1:0.72, b5+1:3.59];[y3+1:-1.12, y6+2:1.32];[M8+2:-0.21, M8+2:-1.01]	[b3+1:8395, b5+1:13066];[y3+1:9564, y6+2:25766];[M8+2:69102, M8+2:197118]	6		19.1207	158.005	12	2;2	4	9	46
NS1	NS1	101	112	NS1NS1101112	K	K	1	W:\Collaboration_Services\Raw_files_FPL\Fusion Lumos\2021\Zheng\20211204_ZS_WP_SV_ns1_xlms\2021-12-04-10-10-24\Task1-Calibrate\20211203_ZS_WP_SV_ns1_R1-calib.mzML	14237	14190	550.888	5	2749.4	Intra	K;K		NS1	112	SLRPQPTELKYSWK	SLRPQPTELKYSWK(10)	1731.93	10.0328	{14237@[y2+1, y4+1, y5+1, y5+1];[b5+1, b7+2, b9+2, b13+2];[M14+2, M14+2]}{14241@[b5+1]}{14242@}	{14237@[y2+1:333.19143, y4+1:583.28690, y5+1:765.39654, y5+1:797.37090];[b5+1:582.33685, b7+2:390.72189, b9+2:511.78469, b13+2:820.92936];[M14+2:893.97774, M14+2:909.96380]}{14241@[b5+1:582.33334]}{14242@}	{14237@[y2+1:-0.00068, y4+1:-0.00058, y5+1:0.00354, y5+1:0.00582];[b5+1:0.00102, b7+2:0.00024, b9+2:-0.00082, b13+2:0.00833];[M14+2:-0.00044, M14+2:-0.00039]}{14241@[b5+1:-0.00248]}{14242@}	{14237@[y2+1:-2.06, y4+1:-0.99, y5+1:4.63, y5+1:7.31];[b5+1:1.76, b7+2:0.31, b9+2:-0.80, b13+2:5.08];[M14+2:-0.25, M14+2:-0.21]}{14241@[b5+1:-4.27]}{14242@}	{14237@[y2+1:54908, y4+1:72371, y5+1:53384, y5+1:61071];[b5+1:152154, b7+2:162099, b9+2:89097, b13+2:60293];[M14+2:117434, M14+2:155294]}{14241@[b5+1:847]}{14242@}	{14237@10}{14241@1}{14242@0}		NS1	101	GIMQAGKR	GIMQAGKR(7)	859.47	8.07426	{14237@[b3+1, b4+1, b5+1];[y4+1, y6+1, y6+2];[M8+2, M8+2]}{14239@}{14240@}	{14237@[b3+1:302.15420, b4+1:430.21246, b5+1:501.24923];[y4+1:485.28320, y6+1:744.37682, y6+2:388.68098];[M8+2:457.74715, M8+2:473.73348]}{14239@}{14240@}	{14237@[b3+1:0.00091, b4+1:0.00059, b5+1:0.00025];[y4+1:0.00014, y6+1:-0.00529, y6+2:0.00049];[M8+2:-0.00062, M8+2:-0.00003]}{14239@}{14240@}	{14237@[b3+1:3.03, b4+1:1.38, b5+1:0.50];[y4+1:0.30, y6+1:-7.12, y6+2:0.63];[M8+2:-0.68, M8+2:-0.03]}{14239@}{14240@}	{14237@[b3+1:74569, b4+1:50966, b5+1:95013];[y4+1:151734, y6+1:94918, y6+2:202296];[M8+2:646866, M8+2:899569]}{14239@}{14240@}	{14237@8}{14239@0}{14240@0}		18.107	158.004	5	2;2	4	8	46
NS1	NS1	101	112	NS1NS1101112	K	K	1	W:\Collaboration_Services\Raw_files_FPL\Fusion Lumos\2021\Zheng\20211204_ZS_WP_SV_ns1_xlms\2021-12-04-10-10-24\Task1-Calibrate\20211203_ZS_WP_SV_ns1_R1-calib.mzML	12553	12535	692.357	4	2765.4	Intra	K;K		NS1	101	GIMQAGKR	GIM[Common Variable:Oxidation on M]QAGKR(7)	875.465	12.0587	{12553@[b3+1, b5+1, b7+1];[y3+1, y3+1, y4+1, y5+1, y5+1, y6+1, y6+1];[M8+1, M8+2]}{12557@}{12558@}	{12553@[b3+1:318.14790, b5+1:517.24422, b7+1:756.36951];[y3+1:414.24572, y3+1:446.21564, y4+1:485.28228, y5+1:613.34224, y5+1:645.31734, y6+1:760.37640, y6+1:792.34597];[M8+1:930.48287, M8+2:481.73068]}{12557@}{12558@}	{12553@[b3+1:-0.00031, b5+1:0.00033, b7+1:-0.00137];[y3+1:-0.00022, y3+1:-0.00238, y4+1:-0.00077, y5+1:0.00061, y5+1:0.00363, y6+1:-0.00063, y6+1:-0.00314];[M8+1:0.00031, M8+2:-0.00056]}{12557@}{12558@}	{12553@[b3+1:-0.97, b5+1:0.64, b7+1:-1.81];[y3+1:-0.54, y3+1:-5.35, y4+1:-1.59, y5+1:1.00, y5+1:5.64, y6+1:-0.83, y6+1:-3.97];[M8+1:0.33, M8+2:-0.58]}{12557@}{12558@}	{12553@[b3+1:13077, b5+1:16937, b7+1:3473];[y3+1:23629, y3+1:7538, y4+1:14002, y5+1:19450, y5+1:6143, y6+1:20110, y6+1:4178];[M8+1:8557, M8+2:28943]}{12557@}{12558@}	{12553@12}{12557@0}{12558@0}		NS1	112	SLRPQPTELKYSWK	SLRPQPTELKYSWK(10)	1731.93	4.09458	{12553@[y4+1];[b8+1];[M14+3, M14+2]}{12555@[b5+1, b12+1]}{12556@[b5+1, b10+1, b11+1];[y11+1]}	{12553@[y4+1:583.28668];[b8+1:909.47737];[M14+3:596.32141, M14+2:909.96353]}{12555@[b5+1:582.33361, b12+1:1486.73262]}{12556@[b5+1:582.33356, b10+1:1204.66712, b11+1:1367.73385];[y11+1:1430.73388]}	{12553@[y4+1:-0.00079];[b8+1:-0.00149];[M14+3:0.00105, M14+2:-0.00094]}{12555@[b5+1:-0.00221, b12+1:-0.00326]}{12556@[b5+1:-0.00226, b10+1:-0.00132, b11+1:0.00208];[y11+1:0.00244]}	{12553@[y4+1:-1.36];[b8+1:-1.64];[M14+3:0.59, M14+2:-0.52]}{12555@[b5+1:-3.81, b12+1:-2.19]}{12556@[b5+1:-3.89, b10+1:-1.10, b11+1:1.52];[y11+1:1.71]}	{12553@[y4+1:5290];[b8+1:4561];[M14+3:6031, M14+2:251663]}{12555@[b5+1:80, b12+1:166]}{12556@[b5+1:42, b10+1:69, b11+1:123];[y11+1:42]}	{12553@4}{12555@2}{12556@4}		16.1533	158.004	26	2;2	4	35	5
NS1	NS1	101	112	NS1NS1101112	K	K	2	W:\Collaboration_Services\Raw_files_FPL\Fusion Lumos\2021\Zheng\20211204_ZS_WP_SV_ns1_xlms\2021-12-04-10-10-24\Task1-Calibrate\20211203_ZS_WP_SV_ns1_R2-calib.mzML	12700	12676	554.087	5	2765.4	Intra	K;K		NS1	112	SLRPQPTELKYSWK	SLRPQPTELKYSWK(10)	1731.93	18.0805	[b2+1, b3+1, b5+2, b7+2, b8+2, b9+2, b11+2, b12+2, b13+2];[y2+1, y3+1, y4+1, y5+1, y6+1, y7+1, y9+2];[M14+3, M14+2]	[b2+1:201.12328, b3+1:357.22436, b5+2:291.67190, b7+2:390.72198, b8+2:455.24221, b9+2:511.78578, b11+2:684.37006, b12+2:727.88554, b13+2:820.92604];[y2+1:333.19204, y3+1:420.22388, y4+1:583.28751, y5+1:765.39458, y6+1:878.47767, y7+1:1007.51924, y9+2:603.31269];[M14+3:596.32140, M14+2:909.96377]	[b2+1:-0.00009, b3+1:-0.00012, b5+2:0.00069, b7+2:0.00043, b8+2:-0.00172, b9+2:0.00136, b11+2:0.00106, b12+2:-0.00000, b13+2:0.00169];[y2+1:-0.00008, y3+1:-0.00027, y4+1:0.00004, y5+1:0.00159, y6+1:0.00061, y7+1:-0.00041, y9+2:-0.00198];[M14+3:0.00099, M14+2:-0.00045]	[b2+1:-0.47, b3+1:-0.34, b5+2:1.19, b7+2:0.55, b8+2:-1.89, b9+2:1.33, b11+2:0.78, b12+2:-0.00, b13+2:1.03];[y2+1:-0.25, y3+1:-0.64, y4+1:0.06, y5+1:2.08, y6+1:0.69, y7+1:-0.41, y9+2:-1.65];[M14+3:0.56, M14+2:-0.25]	[b2+1:5801, b3+1:11011, b5+2:17466, b7+2:51370, b8+2:14481, b9+2:26746, b11+2:13035, b12+2:20574, b13+2:12242];[y2+1:13016, y3+1:18498, y4+1:39576, y5+1:12243, y6+1:11803, y7+1:11101, y9+2:26275];[M14+3:179390, M14+2:13695]	18		NS1	101	GIMQAGKR	GIM[Common Variable:Oxidation on M]QAGKR(7)	875.465	11.1156	{12700@[y1+1, y3+1, y3+1, y5+1, y6+1, y6+2];[b3+1, b5+1, b7+1];[M8+2, M8+2]}{12709@}	{12700@[y1+1:175.11872, y3+1:414.24570, y3+1:446.21625, y5+1:613.33810, y6+1:760.37688, y6+2:396.67834];[b3+1:318.14827, b5+1:517.24757, b7+1:788.34436];[M8+2:465.74446, M8+2:481.73099]}{12709@}	{12700@[y1+1:-0.00023, y3+1:-0.00024, y3+1:-0.00177, y5+1:-0.00353, y6+1:-0.00015, y6+2:0.00030];[b3+1:0.00007, b5+1:0.00368, b7+1:0.00139];[M8+2:-0.00091, M8+2:0.00007]}{12709@}	{12700@[y1+1:-1.31, y3+1:-0.58, y3+1:-3.97, y5+1:-5.76, y6+1:-0.19, y6+2:0.38];[b3+1:0.21, b5+1:7.13, b7+1:1.77];[M8+2:-0.98, M8+2:0.08]}{12709@}	{12700@[y1+1:6192, y3+1:12537, y3+1:20745, y5+1:7155, y6+1:6234, y6+2:52830];[b3+1:16052, b5+1:19738, b7+1:7071];[M8+2:154065, M8+2:413306]}{12709@}	{12700@11}{12709@0}		29.196	158.004	32	2;2	4	4	3
NS1	NS1	101	112	NS1NS1101112	K	K	2	W:\Collaboration_Services\Raw_files_FPL\Fusion Lumos\2021\Zheng\20211204_ZS_WP_SV_ns1_xlms\2021-12-04-10-10-24\Task1-Calibrate\20211203_ZS_WP_SV_ns1_R2-calib.mzML	14403	14401	688.359	4	2749.41	Intra	K;K		NS1	101	GIMQAGKR	GIMQAGKR(7)	859.47	14.0542	{14403@[y2+1, y3+1, y4+1, y4+1, y5+1, y5+1, y6+2, y6+1];[b3+1, b4+1, b5+1, b7+1];[M8+1, M8+2]}{14406@}{14407@}	{14403@[y2+1:357.22387, y3+1:414.24556, y4+1:485.28296, y4+1:517.25487, y5+1:613.34100, y5+1:645.31387, y6+2:372.69471, y6+1:776.35450];[b3+1:302.15330, b4+1:430.21196, b5+1:501.24947, b7+1:740.37439];[M8+1:914.48547, M8+2:473.73347]}{14406@}{14407@}	{14403@[y2+1:-0.00060, y3+1:-0.00038, y4+1:-0.00010, y4+1:-0.00026, y5+1:-0.00063, y5+1:0.00016, y6+2:0.00002, y6+1:0.00031];[b3+1:0.00001, b4+1:0.00010, b5+1:0.00049, b7+1:-0.00158];[M8+1:-0.00217, M8+2:-0.00007]}{14406@}{14407@}	{14403@[y2+1:-1.69, y3+1:-0.92, y4+1:-0.20, y4+1:-0.51, y5+1:-1.03, y5+1:0.25, y6+2:0.03, y6+1:0.40];[b3+1:0.03, b4+1:0.23, b5+1:0.98, b7+1:-2.13];[M8+1:-2.38, M8+2:-0.07]}{14406@}{14407@}	{14403@[y2+1:23146, y3+1:217403, y4+1:196486, y4+1:38821, y5+1:151972, y5+1:27910, y6+2:214676, y6+1:55791];[b3+1:52809, b4+1:43986, b5+1:119054, b7+1:29824];[M8+1:104706, M8+2:219413]}{14406@}{14407@}	{14403@14}{14406@0}{14407@0}		NS1	112	SLRPQPTELKYSWK	SLRPQPTELKYSWK(10)	1731.93	10.0864	{14403@[y2+1, y3+1, y4+1, y5+1, y7+1];[b5+1, b8+1, b9+2];[M14+3, M14+2]}{14404@[y9+1];[b12+1]}{14405@[b10+1, b11+1]}	{14403@[y2+1:333.19249, y3+1:420.22441, y4+1:583.28809, y5+1:765.39692, y7+1:1007.52670];[b5+1:582.33497, b8+1:909.47833, b9+2:511.78523];[M14+3:596.32118, M14+2:909.96390]}{14404@[y9+1:1237.60034];[b12+1:1486.73232]}{14405@[b10+1:1204.66567, b11+1:1367.73384]}	{14403@[y2+1:0.00038, y3+1:0.00027, y4+1:0.00062, y5+1:0.00392, y7+1:0.00704];[b5+1:-0.00085, b8+1:-0.00053, b9+2:0.00026];[M14+3:0.00035, M14+2:-0.00021]}{14404@[y9+1:0.00816];[b12+1:-0.00356]}{14405@[b10+1:-0.00277, b11+1:0.00207]}	{14403@[y2+1:1.13, y3+1:0.64, y4+1:1.07, y5+1:5.13, y7+1:7.00];[b5+1:-1.47, b8+1:-0.58, b9+2:0.26];[M14+3:0.19, M14+2:-0.11]}{14404@[y9+1:6.60];[b12+1:-2.40]}{14405@[b10+1:-2.30, b11+1:1.51]}	{14403@[y2+1:31069, y3+1:25581, y4+1:80731, y5+1:24414, y7+1:20456];[b5+1:39115, b8+1:30191, b9+2:40443];[M14+3:187876, M14+2:1904947]}{14404@[y9+1:2840];[b12+1:1300]}{14405@[b10+1:1398, b11+1:402]}	{14403@10}{14404@2}{14405@2}		24.1405	158.006	3	2;2	4	12	11
NS1	NS1	101	112	NS1NS1101112	K	K	2	W:\Collaboration_Services\Raw_files_FPL\Fusion Lumos\2021\Zheng\20211204_ZS_WP_SV_ns1_xlms\2021-12-04-10-10-24\Task1-Calibrate\20211203_ZS_WP_SV_ns1_R2-calib.mzML	12684	12670	554.087	5	2765.4	Intra	K;K		NS1	112	SLRPQPTELKYSWK	SLRPQPTELKYSWK(10)	1731.93	14.0749	[y2+1, y3+1, y4+1, y5+1, y6+1, y7+1, y9+2];[b3+1, b5+1, b7+2, b8+2, b9+2];[M14+3, M14+3]	[y2+1:333.19214, y3+1:420.22411, y4+1:583.28642, y5+1:765.39235, y6+1:878.47941, y7+1:1007.51386, y9+2:619.29584];[b3+1:357.22474, b5+1:582.33611, b7+2:390.72162, b8+2:455.24091, b9+2:511.78465];[M14+3:596.32075, M14+3:606.97957]	[y2+1:0.00002, y3+1:-0.00004, y4+1:-0.00105, y5+1:-0.00065, y6+1:0.00235, y7+1:-0.00580, y9+2:-0.00777];[b3+1:0.00026, b5+1:0.00028, b7+2:-0.00031, b8+2:-0.00431, b9+2:-0.00089];[M14+3:-0.00094, M14+3:0.00345]	[y2+1:0.06, y3+1:-0.09, y4+1:-1.81, y5+1:-0.84, y6+1:2.68, y7+1:-5.76, y9+2:-6.28];[b3+1:0.72, b5+1:0.49, b7+2:-0.40, b8+2:-4.75, b9+2:-0.87];[M14+3:-0.53, M14+3:1.90]	[y2+1:8198, y3+1:12360, y4+1:16456, y5+1:13602, y6+1:6133, y7+1:7945, y9+2:5610];[b3+1:7446, b5+1:25399, b7+2:31638, b8+2:10718, b9+2:14779];[M14+3:94981, M14+3:12129]	14		NS1	101	GIMQAGKR	GIM[Common Variable:Oxidation on M]QAGKR(7)	875.465	8.11726	{12684@[b3+1, b5+1];[y3+1, y3+1, y6+2, y6+2];[M8+2, M8+2]}{12686@}	{12684@[b3+1:318.14779, b5+1:517.24643];[y3+1:414.24565, y3+1:446.21517, y6+2:380.69226, y6+2:396.67812];[M8+2:465.74479, M8+2:481.73075]}{12686@}	{12684@[b3+1:-0.00041, b5+1:0.00254];[y3+1:-0.00029, y3+1:-0.00285, y6+2:0.00021, y6+2:-0.00016];[M8+2:-0.00025, M8+2:-0.00041]}{12686@}	{12684@[b3+1:-1.29, b5+1:4.92];[y3+1:-0.70, y3+1:-6.40, y6+2:0.27, y6+2:-0.20];[M8+2:-0.27, M8+2:-0.43]}{12686@}	{12684@[b3+1:12106, b5+1:10102];[y3+1:8139, y3+1:11831, y6+2:37641, y6+2:30450];[M8+2:77125, M8+2:231401]}{12686@}	{12684@8}{12686@0}		22.1921	158.006	6	2;2	4	5	52
NS1	NS1	101	112	NS1NS1101112	K	K	3	W:\Collaboration_Services\Raw_files_FPL\Fusion Lumos\2021\Zheng\20211204_ZS_WP_SV_ns1_xlms\2021-12-04-10-10-24\Task1-Calibrate\20211203_ZS_WP_SV_ns1_R3-calib.mzML	13814	13772	688.358	4	2749.4	Intra	K;K		NS1	101	GIMQAGKR	GIMQAGKR(7)	859.47	15.1023	{13814@[y2+1, y3+1, y3+1, y4+1, y4+1, y5+1, y5+1, y6+2, y6+1];[b3+1, b4+1, b5+1, b7+1];[M8+2, M8+2]}{13818@}{13819@}	{13814@[y2+1:357.22494, y3+1:414.24591, y3+1:446.21584, y4+1:485.28323, y4+1:517.25465, y5+1:613.34160, y5+1:645.31431, y6+2:372.69480, y6+1:776.35481];[b3+1:302.15361, b4+1:430.21224, b5+1:501.24882, b7+1:740.37684];[M8+2:457.74755, M8+2:473.73373]}{13818@}{13819@}	{13814@[y2+1:0.00047, y3+1:-0.00003, y3+1:-0.00218, y4+1:0.00017, y4+1:-0.00048, y5+1:-0.00003, y5+1:0.00060, y6+2:0.00021, y6+1:0.00062];[b3+1:0.00032, b4+1:0.00037, b5+1:-0.00016, b7+1:0.00087];[M8+2:0.00019, M8+2:0.00047]}{13818@}{13819@}	{13814@[y2+1:1.32, y3+1:-0.07, y3+1:-4.89, y4+1:0.36, y4+1:-0.94, y5+1:-0.05, y5+1:0.94, y6+2:0.28, y6+1:0.80];[b3+1:1.07, b4+1:0.86, b5+1:-0.32, b7+1:1.18];[M8+2:0.21, M8+2:0.50]}{13818@}{13819@}	{13814@[y2+1:22092, y3+1:202951, y3+1:26789, y4+1:234305, y4+1:38252, y5+1:192739, y5+1:28653, y6+2:201998, y6+1:59219];[b3+1:44493, b4+1:44087, b5+1:171252, b7+1:33203];[M8+2:1057185, M8+2:223218]}{13818@}{13819@}	{13814@15}{13818@0}{13819@0}		NS1	112	SLRPQPTELKYSWK	SLRPQPTELKYSWK(10)	1731.93	11.095	{13814@[y2+1, y3+1, y4+1, y5+1, y7+1];[b5+1, b8+1, b9+2, b13+2];[M14+3, M14+2]}{13816@[b5+1, b12+1]}{13817@[b5+1]}	{13814@[y2+1:333.19256, y3+1:420.22496, y4+1:583.28797, y5+1:765.39369, y7+1:1007.51637];[b5+1:582.33590, b8+1:909.47301, b9+2:511.78556, b13+2:820.92601];[M14+3:596.32146, M14+2:909.96388]}{13816@[b5+1:582.33351, b12+1:1486.73378]}{13817@[b5+1:582.33351]}	{13814@[y2+1:0.00044, y3+1:0.00082, y4+1:0.00050, y5+1:0.00069, y7+1:-0.00328];[b5+1:0.00008, b8+1:-0.00585, b9+2:0.00092, b13+2:0.00163];[M14+3:0.00120, M14+2:-0.00023]}{13816@[b5+1:-0.00231, b12+1:-0.00210]}{13817@[b5+1:-0.00231]}	{13814@[y2+1:1.33, y3+1:1.94, y4+1:0.85, y5+1:0.91, y7+1:-3.26];[b5+1:0.14, b8+1:-6.44, b9+2:0.90, b13+2:1.00];[M14+3:0.67, M14+2:-0.13]}{13816@[b5+1:-3.98, b12+1:-1.41]}{13817@[b5+1:-3.98]}	{13814@[y2+1:23878, y3+1:26108, y4+1:82685, y5+1:32103, y7+1:31194];[b5+1:44566, b8+1:30325, b9+2:37471, b13+2:21549];[M14+3:196217, M14+2:1871954]}{13816@[b5+1:533, b12+1:781]}{13817@[b5+1:1058]}	{13814@11}{13816@2}{13817@1}		26.1973	158.001	5	2;2	4	5	4
NS1	NS1	101	112	NS1NS1101112	K	K	3	W:\Collaboration_Services\Raw_files_FPL\Fusion Lumos\2021\Zheng\20211204_ZS_WP_SV_ns1_xlms\2021-12-04-10-10-24\Task1-Calibrate\20211203_ZS_WP_SV_ns1_R3-calib.mzML	13839	13813	550.888	5	2749.4	Intra	K;K		NS1	101	GIMQAGKR	GIMQAGKR(7)	859.47	9.06414	{13839@[y2+1, y3+1, y4+1, y6+2, y6+1];[b3+1, b5+1];[M8+2, M8+2]}{13841@}{13842@}	{13839@[y2+1:357.22304, y3+1:414.24463, y4+1:485.28326, y6+2:372.69459, y6+1:776.35424];[b3+1:302.15396, b5+1:501.24799];[M8+2:457.74717, M8+2:473.73315]}{13841@}{13842@}	{13839@[y2+1:-0.00143, y3+1:-0.00131, y4+1:0.00021, y6+2:-0.00022, y6+1:0.00005];[b3+1:0.00067, b5+1:-0.00099];[M8+2:-0.00057, M8+2:-0.00071]}{13841@}{13842@}	{13839@[y2+1:-4.03, y3+1:-3.16, y4+1:0.43, y6+2:-0.29, y6+1:0.06];[b3+1:2.23, b5+1:-1.99];[M8+2:-0.63, M8+2:-0.75]}{13841@}{13842@}	{13839@[y2+1:30358, y3+1:32102, y4+1:58719, y6+2:185415, y6+1:50837];[b3+1:27711, b5+1:82608];[M8+2:373237, M8+2:485485]}{13841@}{13842@}	{13839@9}{13841@0}{13842@0}		NS1	112	SLRPQPTELKYSWK	SLRPQPTELKYSWK(10)	1731.93	7.0309	{13839@[y2+1, y3+1, y9+2];[b5+1, b7+2];[M14+2, M14+2]}{13843@}{13844@}	{13839@[y2+1:333.19200, y3+1:420.22492, y9+2:619.29958];[b5+1:582.33585, b7+2:390.72078];[M14+2:893.97744, M14+2:909.96306]}{13843@}{13844@}	{13839@[y2+1:-0.00012, y3+1:0.00078, y9+2:-0.00029];[b5+1:0.00003, b7+2:-0.00198];[M14+2:-0.00103, M14+2:-0.00188]}{13843@}{13844@}	{13839@[y2+1:-0.36, y3+1:1.85, y9+2:-0.23];[b5+1:0.05, b7+2:-2.54];[M14+2:-0.58, M14+2:-1.04]}{13843@}{13844@}	{13839@[y2+1:42703, y3+1:37472, y9+2:30300];[b5+1:89917, b7+2:166077];[M14+2:109859, M14+2:162658]}{13843@}{13844@}	{13839@7}{13843@0}{13844@0}		16.095	158.003	2	2;2	4	4	9
NS1	NS1	101	112	NS1NS1101112	K	K	3	W:\Collaboration_Services\Raw_files_FPL\Fusion Lumos\2021\Zheng\20211204_ZS_WP_SV_ns1_xlms\2021-12-04-10-10-24\Task1-Calibrate\20211203_ZS_WP_SV_ns1_R3-calib.mzML	11954	11950	554.087	5	2765.4	Intra	K;K		NS1	112	SLRPQPTELKYSWK	SLRPQPTELKYSWK(10)	1731.93	9.06407	[y2+1, y3+1, y4+1, y7+1];[b3+1, b5+1, b10+2];[M14+3, M14+3]	[y2+1:333.19240, y3+1:420.22546, y4+1:583.28807, y7+1:1007.52364];[b3+1:357.22508, b5+1:582.33623, b10+2:602.83892];[M14+3:596.32160, M14+3:606.97920]	[y2+1:0.00028, y3+1:0.00132, y4+1:0.00060, y7+1:0.00399];[b3+1:0.00060, b5+1:0.00041, b10+2:0.00212];[M14+3:0.00162, M14+3:0.00234]	[y2+1:0.84, y3+1:3.14, y4+1:1.03, y7+1:3.96];[b3+1:1.69, b5+1:0.70, b10+2:1.76];[M14+3:0.91, M14+3:1.29]	[y2+1:5338, y3+1:4924, y4+1:15435, y7+1:3928];[b3+1:5453, b5+1:14116, b10+2:6152];[M14+3:71920, M14+3:9115]	9		NS1	101	GIMQAGKR	GIM[Common Variable:Oxidation on M]QAGKR(7)	875.465	6.10319	{11954@[y1+1, y6+1];[b3+1, b5+1];[M8+2, M8+2]}{11956@}{11957@}	{11954@[y1+1:175.11873, y6+1:792.34992];[b3+1:318.14837, b5+1:517.24612];[M8+2:465.74499, M8+2:481.73090]}{11956@}{11957@}	{11954@[y1+1:-0.00022, y6+1:0.00081];[b3+1:0.00017, b5+1:0.00223];[M8+2:0.00015, M8+2:-0.00011]}{11956@}{11957@}	{11954@[y1+1:-1.27, y6+1:1.02];[b3+1:0.53, b5+1:4.31];[M8+2:0.16, M8+2:-0.12]}{11956@}{11957@}	{11954@[y1+1:3186, y6+1:4175];[b3+1:3233, b5+1:8504];[M8+2:51078, M8+2:149495]}{11956@}{11957@}	{11954@6}{11956@0}{11957@0}		15.1673	158.006	37	2;2	4	4	7
NS1	NS1	11	11	NS1NS11111	K	K	1	W:\Collaboration_Services\Raw_files_FPL\Fusion Lumos\2021\Zheng\20211204_ZS_WP_SV_ns1_xlms\2021-12-04-10-10-24\Task1-Calibrate\20211203_ZS_WP_SV_ns1_R1-calib.mzML	5354	5352	473.922	3	1418.74	Intra	K;K		NS1	11	NKELK	NKELK(2)	630.37	8.08857	{5354@[b2+1, b3+1, b4+1];[y2+1, y3+1, y4+1];[M5+1, M5+1]}{5355@[b3+1]}{5356@}	{5354@[b2+1:297.15627, b3+1:426.19933, b4+1:539.28028];[y2+1:260.19720, y3+1:389.23980, y4+1:571.34152];[M5+1:685.38778, M5+1:717.35926]}{5355@[b3+1:426.20028]}{5356@}	{5354@[b2+1:0.00054, b3+1:0.00101, b4+1:-0.00211];[y2+1:0.00033, y3+1:0.00034, y4+1:-0.00347];[M5+1:-0.00013, M5+1:-0.00074]}{5355@[b3+1:0.00196]}{5356@}	{5354@[b2+1:1.84, b3+1:2.37, b4+1:-3.91];[y2+1:1.28, y3+1:0.87, y4+1:-6.08];[M5+1:-0.19, M5+1:-1.03]}{5355@[b3+1:4.60]}{5356@}	{5354@[b2+1:9487, b3+1:7585, b4+1:5572];[y2+1:15643, y3+1:14063, y4+1:3661];[M5+1:52868, M5+1:124789]}{5355@[b3+1:55]}{5356@}	{5354@8}{5355@1}{5356@0}		NS1	11	NKELK	NKELK(2)	630.37	8.08857	{5354@[b2+1, b3+1, b4+1];[y2+1, y3+1, y4+1];[M5+1, M5+1]}{5355@[b3+1]}{5356@}	{5354@[b2+1:297.15627, b3+1:426.19933, b4+1:539.28028];[y2+1:260.19720, y3+1:389.23980, y4+1:571.34152];[M5+1:685.38778, M5+1:717.35926]}{5355@[b3+1:426.20028]}{5356@}	{5354@[b2+1:0.00054, b3+1:0.00101, b4+1:-0.00211];[y2+1:0.00033, y3+1:0.00034, y4+1:-0.00347];[M5+1:-0.00013, M5+1:-0.00074]}{5355@[b3+1:0.00196]}{5356@}	{5354@[b2+1:1.84, b3+1:2.37, b4+1:-3.91];[y2+1:1.28, y3+1:0.87, y4+1:-6.08];[M5+1:-0.19, M5+1:-1.03]}{5355@[b3+1:4.60]}{5356@}	{5354@[b2+1:9487, b3+1:7585, b4+1:5572];[y2+1:15643, y3+1:14063, y4+1:3661];[M5+1:52868, M5+1:124789]}{5355@[b3+1:55]}{5356@}	{5354@8}{5355@1}{5356@0}		16.1771	158.004	115	2;2	4	5	5
NS1	NS1	11	11	NS1NS11111	K	K	3	W:\Collaboration_Services\Raw_files_FPL\Fusion Lumos\2021\Zheng\20211204_ZS_WP_SV_ns1_xlms\2021-12-04-10-10-24\Task1-Calibrate\20211203_ZS_WP_SV_ns1_R3-calib.mzML	5231	5229	473.922	3	1418.74	Intra	K;K		NS1	11	NKELK	NKELK(2)	630.37	6.12359	{5231@[b2+1, b3+1];[y2+1, y3+1];[M5+1, M5+1]}{5232@[b3+1]}{5233@}{5234@[b3+1]}	{5231@[b2+1:297.15531, b3+1:426.19820];[y2+1:260.19677, y3+1:389.23849];[M5+1:685.38770, M5+1:717.35909]}{5232@[b3+1:426.20021]}{5233@}{5234@[b3+1:426.20025]}	{5231@[b2+1:-0.00041, b3+1:-0.00012];[y2+1:-0.00010, y3+1:-0.00097];[M5+1:-0.00021, M5+1:-0.00090]}{5232@[b3+1:0.00189]}{5233@}{5234@[b3+1:0.00193]}	{5231@[b2+1:-1.40, b3+1:-0.29];[y2+1:-0.40, y3+1:-2.50];[M5+1:-0.31, M5+1:-1.26]}{5232@[b3+1:4.46]}{5233@}{5234@[b3+1:4.54]}	{5231@[b2+1:3832, b3+1:3306];[y2+1:14473, y3+1:6730];[M5+1:44692, M5+1:96578]}{5232@[b3+1:20]}{5233@}{5234@[b3+1:54]}	{5231@6}{5232@1}{5233@0}{5234@1}		NS1	11	NKELK	NKELK(2)	630.37	6.12359	{5231@[b2+1, b3+1];[y2+1, y3+1];[M5+1, M5+1]}{5232@[b3+1]}{5233@}{5234@[b3+1]}	{5231@[b2+1:297.15531, b3+1:426.19820];[y2+1:260.19677, y3+1:389.23849];[M5+1:685.38770, M5+1:717.35909]}{5232@[b3+1:426.20021]}{5233@}{5234@[b3+1:426.20025]}	{5231@[b2+1:-0.00041, b3+1:-0.00012];[y2+1:-0.00010, y3+1:-0.00097];[M5+1:-0.00021, M5+1:-0.00090]}{5232@[b3+1:0.00189]}{5233@}{5234@[b3+1:0.00193]}	{5231@[b2+1:-1.40, b3+1:-0.29];[y2+1:-0.40, y3+1:-2.50];[M5+1:-0.31, M5+1:-1.26]}{5232@[b3+1:4.46]}{5233@}{5234@[b3+1:4.54]}	{5231@[b2+1:3832, b3+1:3306];[y2+1:14473, y3+1:6730];[M5+1:44692, M5+1:96578]}{5232@[b3+1:20]}{5233@}{5234@[b3+1:54]}	{5231@6}{5232@1}{5233@0}{5234@1}		12.2472	158.004	14	2;2	4	4	4
NS1	NS1	2	14	NS1NS1214	K	S	1	W:\Collaboration_Services\Raw_files_FPL\Fusion Lumos\2021\Zheng\20211204_ZS_WP_SV_ns1_xlms\2021-12-04-10-10-24\Task1-Calibrate\20211203_ZS_WP_SV_ns1_R1-calib.mzML	25693	25658	955.939	4	3819.73	Intra	K;S		NS1	14	ELKCGSGIFITDNVHTWTEQYK	ELKC[Common Fixed:Carbamidomethyl on C]GSGIFITDNVHTWTEQYK(3)	2625.25	16.1795	{25693@[b3+1, b3+1];[y5+1, y6+1, y10+1, y12+2, y13+2, y14+2, y16+2, y17+2, y18+2, y19+2, y20+2, y20+3];[M22+3, M22+3]}{25696@[b13+1]}	{25693@[b3+1:425.24003, b3+1:457.21224];[y5+1:668.32804, y6+1:854.40377, y10+1:1305.62345, y12+2:761.35249, y13+2:817.89360, y14+2:891.42852, y16+2:976.48193, y17+2:1019.99779, y18+2:1048.50795, y19+2:1128.52350, y20+2:1219.57587, y20+3:824.04430];[M22+3:894.09534, M22+3:904.75290]}{25696@[b13+1:1521.66865]}	{25693@[b3+1:0.00058, b3+1:0.00070];[y5+1:0.00306, y6+1:-0.00052, y10+1:0.00123, y12+2:0.00085, y13+2:-0.00099, y14+2:0.00043, y16+2:0.00173, y17+2:0.00142, y18+2:0.00027, y19+2:0.00073, y20+2:-0.00005, y20+3:0.00176];[M22+3:0.00028, M22+3:0.00088]}{25696@[b13+1:-0.00258]}	{25693@[b3+1:1.36, b3+1:1.54];[y5+1:4.59, y6+1:-0.61, y10+1:0.94, y12+2:0.56, y13+2:-0.61, y14+2:0.24, y16+2:0.89, y17+2:0.70, y18+2:0.13, y19+2:0.32, y20+2:-0.02, y20+3:0.71];[M22+3:0.10, M22+3:0.33]}{25696@[b13+1:-1.70]}	{25693@[b3+1:25141, b3+1:20650];[y5+1:13028, y6+1:15374, y10+1:18489, y12+2:145715, y13+2:69823, y14+2:256874, y16+2:264602, y17+2:103560, y18+2:510075, y19+2:848849, y20+2:24334, y20+3:124594];[M22+3:398880, M22+3:259492]}{25696@[b13+1:207]}	{25693@16}{25696@1}		NS1	2	DSGCVVSWK	DSGC[Common Fixed:Carbamidomethyl on C]VVSWK(2)	1036.46	4.07162	[y3+1, y7+1];[M9+1, M9+1]	[y3+1:420.22483, y7+1:835.41382];[M9+1:1091.48342, M9+1:1123.45452]	[y3+1:0.00068, y7+1:0.00074];[M9+1:0.00080, M9+1:-0.00017]	[y3+1:1.63, y7+1:0.88];[M9+1:0.74, M9+1:-0.15]	[y3+1:19274, y7+1:23527];[M9+1:839284, M9+1:354596]	4		20.2511	158.007	21	2;2	4	5	2
NS1	NS1	2	14	NS1NS1214	K	S	2	W:\Collaboration_Services\Raw_files_FPL\Fusion Lumos\2021\Zheng\20211204_ZS_WP_SV_ns1_xlms\2021-12-04-10-10-24\Task1-Calibrate\20211203_ZS_WP_SV_ns1_R2-calib.mzML	25606	25554	955.938	4	3819.72	Intra	K;S		NS1	14	ELKCGSGIFITDNVHTWTEQYK	ELKC[Common Fixed:Carbamidomethyl on C]GSGIFITDNVHTWTEQYK(3)	2625.25	15.1666	{25606@[b3+1, b3+1];[y5+1, y6+1, y12+2, y13+2, y14+2, y16+2, y17+2, y18+2, y19+2, y20+2, y20+2];[M22+3, M22+2]}{25608@[y6+1]}{25609@}	{25606@[b3+1:425.24001, b3+1:457.21022];[y5+1:668.32471, y6+1:854.40446, y12+2:761.35155, y13+2:817.89287, y14+2:891.42741, y16+2:976.48035, y17+2:1019.99566, y18+2:1048.50656, y19+2:1128.52166, y20+2:1219.57476, y20+2:1235.56108];[M22+3:894.09410, M22+2:1356.62276]}{25608@[y6+1:854.39996]}{25609@}	{25606@[b3+1:0.00056, b3+1:-0.00131];[y5+1:-0.00028, y6+1:0.00017, y12+2:-0.00102, y13+2:-0.00245, y14+2:-0.00179, y16+2:-0.00144, y17+2:-0.00284, y18+2:-0.00251, y19+2:-0.00296, y20+2:-0.00228, y20+2:-0.00172];[M22+3:-0.00343, M22+2:-0.00501]}{25608@[y6+1:-0.00434]}{25609@}	{25606@[b3+1:1.31, b3+1:-2.88];[y5+1:-0.41, y6+1:0.20, y12+2:-0.67, y13+2:-1.50, y14+2:-1.00, y16+2:-0.74, y17+2:-1.39, y18+2:-1.20, y19+2:-1.31, y20+2:-0.94, y20+2:-0.70];[M22+3:-1.28, M22+2:-1.85]}{25608@[y6+1:-5.08]}{25609@}	{25606@[b3+1:25610, b3+1:16423];[y5+1:21449, y6+1:15178, y12+2:142079, y13+2:98626, y14+2:277652, y16+2:250436, y17+2:115179, y18+2:632350, y19+2:937649, y20+2:35562, y20+2:24369];[M22+3:446709, M22+2:34444]}{25608@[y6+1:259]}{25609@}	{25606@15}{25608@1}{25609@0}		NS1	2	DSGCVVSWK	DSGC[Common Fixed:Carbamidomethyl on C]VVSWK(2)	1036.46	4.07138	[y3+1, y7+1];[M9+1, M9+1]	[y3+1:420.22436, y7+1:835.40984];[M9+1:1091.48147, M9+1:1123.45132]	[y3+1:0.00021, y7+1:-0.00325];[M9+1:-0.00115, M9+1:-0.00338]	[y3+1:0.50, y7+1:-3.90];[M9+1:-1.05, M9+1:-3.01]	[y3+1:24534, y7+1:20090];[M9+1:908000, M9+1:364685]	4		19.2379	158.004	31	2;2	4	12	2
NS1	NS1	2	14	NS1NS1214	K	S	3	W:\Collaboration_Services\Raw_files_FPL\Fusion Lumos\2021\Zheng\20211204_ZS_WP_SV_ns1_xlms\2021-12-04-10-10-24\Task1-Calibrate\20211203_ZS_WP_SV_ns1_R3-calib.mzML	24717	24680	955.937	4	3819.72	Intra	K;S		NS1	14	ELKCGSGIFITDNVHTWTEQYK	ELKC[Common Fixed:Carbamidomethyl on C]GSGIFITDNVHTWTEQYK(3)	2625.25	15.138	{24717@[b3+1, b3+1];[y6+1, y10+1, y12+2, y13+2, y14+2, y16+2, y17+2, y18+2, y19+3, y20+3, y20+3];[M22+3, M22+3]}{24719@}{24720@[b2+1]}	{24717@[b3+1:425.23993, b3+1:457.21237];[y6+1:854.40960, y10+1:1305.62297, y12+2:761.35274, y13+2:817.89432, y14+2:891.42871, y16+2:976.48132, y17+2:1019.99789, y18+2:1048.50824, y19+3:752.68479, y20+3:813.38675, y20+3:824.04379];[M22+3:894.09573, M22+3:904.75266]}{24719@}{24720@[b2+1:243.13361]}	{24717@[b3+1:0.00047, b3+1:0.00083];[y6+1:0.00531, y10+1:0.00075, y12+2:0.00136, y13+2:0.00045, y14+2:0.00081, y16+2:0.00050, y17+2:0.00163, y18+2:0.00085, y19+3:0.00081, y20+3:0.00118, y20+3:0.00021];[M22+3:0.00147, M22+3:0.00018]}{24719@}{24720@[b2+1:-0.00032]}	{24717@[b3+1:1.10, b3+1:1.83];[y6+1:6.22, y10+1:0.57, y12+2:0.89, y13+2:0.27, y14+2:0.45, y16+2:0.26, y17+2:0.80, y18+2:0.41, y19+3:0.36, y20+3:0.49, y20+3:0.09];[M22+3:0.55, M22+3:0.07]}{24719@}{24720@[b2+1:-1.32]}	{24717@[b3+1:26965, b3+1:22710];[y6+1:22849, y10+1:18727, y12+2:124586, y13+2:106689, y14+2:293071, y16+2:243028, y17+2:115715, y18+2:602916, y19+3:24548, y20+3:253035, y20+3:131496];[M22+3:421649, M22+3:256480]}{24719@}{24720@[b2+1:542]}	{24717@15}{24719@0}{24720@1}		NS1	2	DSGCVVSWK	DSGC[Common Fixed:Carbamidomethyl on C]VVSWK(2)	1036.46	4.07166	[y3+1, y7+1];[M9+1, M9+1]	[y3+1:420.22454, y7+1:835.41294];[M9+1:1091.48322, M9+1:1123.45335]	[y3+1:0.00039, y7+1:-0.00015];[M9+1:0.00060, M9+1:-0.00135]	[y3+1:0.94, y7+1:-0.18];[M9+1:0.55, M9+1:-1.20]	[y3+1:25435, y7+1:24074];[M9+1:969599, M9+1:364775]	4		19.2096	158.002	31	2;2	4	5	2
NS1	NS1	2	9	NS1NS129	K	S	1	W:\Collaboration_Services\Raw_files_FPL\Fusion Lumos\2021\Zheng\20211204_ZS_WP_SV_ns1_xlms\2021-12-04-10-10-24\Task1-Calibrate\20211203_ZS_WP_SV_ns1_R1-calib.mzML	20605	20577	825.365	3	2473.07	Intra	K;S		NS1	9	DSGCVVSWKNK	DSGC[Common Fixed:Carbamidomethyl on C]VVSWKNK(9)	1278.6	23.185	{20605@[y2+1, y3+1, y3+1, y4+1, y4+1, y5+1, y5+1, y6+1, y6+1, y7+1, y7+1, y9+2];[b4+1, b5+1, b6+1, b7+1, b8+1, b9+1, b9+1, b10+1, b10+1];[M11+1, M11+2]}{20607@[b2+1];[y8+1]}{20608@}	{20605@[y2+1:261.15583, y3+1:443.26198, y3+1:475.23419, y4+1:629.34118, y4+1:661.31421, y5+1:716.37386, y5+1:748.34576, y6+1:815.44250, y6+1:847.41412, y7+1:914.51105, y7+1:946.48467, y9+2:566.28503];[b4+1:420.11868, b5+1:519.18756, b6+1:618.25600, b7+1:705.28832, b8+1:891.36753, b9+1:1073.47454, b9+1:1105.44691, b10+1:1187.51740, b10+1:1219.48650];[M11+1:1333.61969, M11+2:683.30032]}{20607@[b2+1…	{20605@[y2+1:0.00010, y3+1:0.00073, y3+1:0.00085, y4+1:0.00061, y4+1:0.00157, y5+1:0.00126, y5+1:0.00109, y6+1:0.00149, y6+1:0.00103, y7+1:0.00162, y7+1:0.00316, y9+2:0.00125];[b4+1:0.00032, b5+1:0.00078, b6+1:0.00082, b7+1:0.00111, b8+1:0.00100, b9+1:0.00249, b9+1:0.00278, b10+1:0.00242, b10+1:-0.00056];[M11+1:-0.00082, M11+2:0.00078]}{20607@[b2+1:0.00088];[y8+1:-0.00425]}{20608@}	{20605@[y2+1:0.37, y3+1:1.64, y3+1:1.80, y4+1:0.97, y4+1:2.37, y5+1:1.77, y5+1:1.45, y6+1:1.83, y6+1:1.22, y7+1:1.78, y7+1:3.35, y9+2:1.11];[b4+1:0.76, b5+1:1.51, b6+1:1.32, b7+1:1.57, b8+1:1.13, b9+1:2.32, b9+1:2.51, b10+1:2.04, b10+1:-0.46];[M11+1:-0.62, M11+2:0.57]}{20607@[b2+1:4.38];[y8+1:-3.96]}{20608@}	{20605@[y2+1:130128, y3+1:239426, y3+1:54903, y4+1:268307, y4+1:166734, y5+1:1163107, y5+1:689104, y6+1:767594, y6+1:474978, y7+1:328518, y7+1:186636, y9+2:128206];[b4+1:210551, b5+1:555487, b6+1:1161923, b7+1:281730, b8+1:196241, b9+1:198675, b9+1:107238, b10+1:98908, b10+1:54838];[M11+1:90224, M11+2:1032355]}{20607@[b2+1:2254];[y8+1:2091]}{20608@}	{20605@23}{20607@2}{20608@0}		NS1	2	DSGCVVSWK	DSGC[Common Fixed:Carbamidomethyl on C]VVSWK(2)	1036.46	8.10428	[y3+1, y4+1, y5+1, y6+1, y7+1];[b6+1];[M9+1, M9+1]	[y3+1:420.22476, y4+1:519.29316, y5+1:618.36155, y6+1:778.39335, y7+1:835.41447];[b6+1:672.26561];[M9+1:1091.48356, M9+1:1123.45589]	[y3+1:0.00061, y4+1:0.00060, y5+1:0.00058, y6+1:0.00172, y7+1:0.00138];[b6+1:-0.00014];[M9+1:0.00094, M9+1:0.00119]	[y3+1:1.46, y4+1:1.15, y5+1:0.94, y6+1:2.22, y7+1:1.66];[b6+1:-0.21];[M9+1:0.86, M9+1:1.06]	[y3+1:210252, y4+1:128141, y5+1:85295, y6+1:51088, y7+1:150403];[b6+1:54944];[M9+1:3301665, M9+1:858671]	8		31.2892	158.007	3	2;2	4	2	3
NS1	NS1	2	9	NS1NS129	K	S	2	W:\Collaboration_Services\Raw_files_FPL\Fusion Lumos\2021\Zheng\20211204_ZS_WP_SV_ns1_xlms\2021-12-04-10-10-24\Task1-Calibrate\20211203_ZS_WP_SV_ns1_R2-calib.mzML	20608	20568	825.365	3	2473.07	Intra	K;S		NS1	9	DSGCVVSWKNK	DSGC[Common Fixed:Carbamidomethyl on C]VVSWKNK(9)	1278.6	23.2372	{20608@[y2+1, y3+1, y3+1, y4+1, y4+1, y5+1, y5+1, y6+1, y6+1, y7+1, y7+1, y9+2];[b4+1, b5+1, b6+1, b7+1, b8+1, b9+1, b9+1, b10+1, b10+1];[M11+2, M11+1]}{20610@[b2+1]}{20611@[y9+1]}	{20608@[y2+1:261.15561, y3+1:443.26135, y3+1:475.23389, y4+1:629.34099, y4+1:661.31291, y5+1:716.37313, y5+1:748.34504, y6+1:815.44148, y6+1:847.41312, y7+1:914.50982, y7+1:946.48345, y9+2:566.28472];[b4+1:420.11855, b5+1:519.18675, b6+1:618.25531, b7+1:705.28793, b8+1:891.36669, b9+1:1073.47207, b9+1:1105.44468, b10+1:1187.51395, b10+1:1219.48369];[M11+2:667.31405, M11+1:1365.59218]}{20610@[b2+1…	{20608@[y2+1:-0.00013, y3+1:0.00009, y3+1:0.00056, y4+1:0.00042, y4+1:0.00026, y5+1:0.00054, y5+1:0.00036, y6+1:0.00047, y6+1:0.00003, y7+1:0.00040, y7+1:0.00194, y9+2:0.00062];[b4+1:0.00019, b5+1:-0.00002, b6+1:0.00013, b7+1:0.00071, b8+1:0.00016, b9+1:0.00001, b9+1:0.00055, b10+1:-0.00103, b10+1:-0.00337];[M11+2:0.00031, M11+1:-0.00041]}{20610@[b2+1:0.00049]}{20611@[y9+1:-0.00138]}	{20608@[y2+1:-0.48, y3+1:0.21, y3+1:1.18, y4+1:0.67, y4+1:0.39, y5+1:0.75, y5+1:0.49, y6+1:0.57, y6+1:0.03, y7+1:0.44, y7+1:2.05, y9+2:0.55];[b4+1:0.45, b5+1:-0.05, b6+1:0.21, b7+1:1.01, b8+1:0.18, b9+1:0.01, b9+1:0.50, b10+1:-0.87, b10+1:-2.77];[M11+2:0.23, M11+1:-0.30]}{20610@[b2+1:2.45]}{20611@[y9+1:-1.18]}	{20608@[y2+1:75362, y3+1:193991, y3+1:48430, y4+1:273256, y4+1:162210, y5+1:1121943, y5+1:618956, y6+1:705334, y6+1:432579, y7+1:287363, y7+1:212207, y9+2:131849];[b4+1:176171, b5+1:477716, b6+1:1066200, b7+1:224178, b8+1:166097, b9+1:185267, b9+1:137256, b10+1:99121, b10+1:53138];[M11+2:3134142, M11+1:211894]}{20610@[b2+1:1973]}{20611@[y9+1:1596]}	{20608@23}{20610@1}{20611@1}		NS1	2	DSGCVVSWK	DSGC[Common Fixed:Carbamidomethyl on C]VVSWK(2)	1036.46	8.10265	[y3+1, y4+1, y5+1, y6+1, y7+1];[b6+1];[M9+1, M9+1]	[y3+1:420.22408, y4+1:519.29229, y5+1:618.36001, y6+1:778.39003, y7+1:835.41270];[b6+1:672.26445];[M9+1:1091.48279, M9+1:1123.45525]	[y3+1:-0.00007, y4+1:-0.00027, y5+1:-0.00096, y6+1:-0.00159, y7+1:-0.00039];[b6+1:-0.00130];[M9+1:0.00017, M9+1:0.00055]	[y3+1:-0.16, y4+1:-0.52, y5+1:-1.56, y6+1:-2.04, y7+1:-0.47];[b6+1:-1.94];[M9+1:0.16, M9+1:0.49]	[y3+1:198913, y4+1:135347, y5+1:66065, y6+1:67852, y7+1:74269];[b6+1:54372];[M9+1:3035501, M9+1:780208]	8		31.3398	158.005	3	2;2	4	2	3
NS1	NS1	2	9	NS1NS129	K	S	3	W:\Collaboration_Services\Raw_files_FPL\Fusion Lumos\2021\Zheng\20211204_ZS_WP_SV_ns1_xlms\2021-12-04-10-10-24\Task1-Calibrate\20211203_ZS_WP_SV_ns1_R3-calib.mzML	19900	19884	825.366	3	2473.08	Intra	K;S		NS1	9	DSGCVVSWKNK	DSGC[Common Fixed:Carbamidomethyl on C]VVSWKNK(9)	1278.6	22.1993	{19900@[y2+1, y3+1, y4+1, y4+1, y5+1, y5+1, y6+1, y6+1, y7+1, y7+1, y9+2];[b4+1, b5+1, b6+1, b7+1, b8+1, b9+1, b9+1, b10+1, b10+1];[M11+1, M11+1]}{19902@[b2+1]}{19903@}	{19900@[y2+1:261.15550, y3+1:443.26103, y4+1:629.34091, y4+1:661.31236, y5+1:716.37217, y5+1:748.34415, y6+1:815.44036, y6+1:847.41284, y7+1:914.50801, y7+1:946.48159, y9+2:566.28484];[b4+1:420.11809, b5+1:519.18672, b6+1:618.25492, b7+1:705.28713, b8+1:891.36721, b9+1:1073.47189, b9+1:1105.44262, b10+1:1187.51643, b10+1:1219.48875];[M11+1:1333.61982, M11+1:1365.59100]}{19902@[b2+1:203.06687]}{19…	{19900@[y2+1:-0.00023, y3+1:-0.00023, y4+1:0.00034, y4+1:-0.00029, y5+1:-0.00043, y5+1:-0.00052, y6+1:-0.00065, y6+1:-0.00025, y7+1:-0.00142, y7+1:0.00009, y9+2:0.00087];[b4+1:-0.00027, b5+1:-0.00005, b6+1:-0.00026, b7+1:-0.00008, b8+1:0.00068, b9+1:-0.00017, b9+1:-0.00151, b10+1:0.00145, b10+1:0.00169];[M11+1:-0.00069, M11+1:-0.00159]}{19902@[b2+1:0.00062]}{19903@}	{19900@[y2+1:-0.89, y3+1:-0.51, y4+1:0.54, y4+1:-0.44, y5+1:-0.60, y5+1:-0.70, y6+1:-0.80, y6+1:-0.29, y7+1:-1.55, y7+1:0.09, y9+2:0.77];[b4+1:-0.64, b5+1:-0.10, b6+1:-0.43, b7+1:-0.12, b8+1:0.77, b9+1:-0.16, b9+1:-1.37, b10+1:1.22, b10+1:1.39];[M11+1:-0.52, M11+1:-1.17]}{19902@[b2+1:3.08]}{19903@}	{19900@[y2+1:23036, y3+1:68180, y4+1:68190, y4+1:63350, y5+1:353836, y5+1:197081, y6+1:224957, y6+1:139506, y7+1:86413, y7+1:55026, y9+2:26291];[b4+1:44251, b5+1:143828, b6+1:289242, b7+1:76189, b8+1:49628, b9+1:57560, b9+1:47426, b10+1:24137, b10+1:15872];[M11+1:20482, M11+1:52950]}{19902@[b2+1:966]}{19903@}	{19900@22}{19902@1}{19903@0}		NS1	2	DSGCVVSWK	DSGC[Common Fixed:Carbamidomethyl on C]VVSWK(2)	1036.46	8.11979	[y3+1, y4+1, y5+1, y6+1, y7+1];[b6+1];[M9+1, M9+1]	[y3+1:420.22396, y4+1:519.29189, y5+1:618.36060, y6+1:778.39219, y7+1:835.41391];[b6+1:672.26305];[M9+1:1091.48188, M9+1:1123.45390]	[y3+1:-0.00019, y4+1:-0.00066, y5+1:-0.00038, y6+1:0.00057, y7+1:0.00083];[b6+1:-0.00269];[M9+1:-0.00073, M9+1:-0.00080]	[y3+1:-0.45, y4+1:-1.28, y5+1:-0.61, y6+1:0.73, y7+1:0.99];[b6+1:-4.01];[M9+1:-0.67, M9+1:-0.71]	[y3+1:56528, y4+1:29989, y5+1:16954, y6+1:14053, y7+1:34846];[b6+1:16638];[M9+1:883324, M9+1:226131]	8		30.3191	158.008	3	2;2	4	4	34
NS1	NS1	38	170	NS1NS138170	K	S	2	W:\Collaboration_Services\Raw_files_FPL\Fusion Lumos\2021\Zheng\20211204_ZS_WP_SV_ns1_xlms\2021-12-04-10-10-24\Task1-Calibrate\20211203_ZS_WP_SV_ns1_R2-calib.mzML	34464	34456	924.469	5	4617.31	Intra	K;S		NS1	170	AWNSLEVEDYGFGVFTTNIWLKLK	AWNSLEVEDYGFGVFTTNIWLKLK(22)	2829.44	19.0942	[b5+1, b6+1, b7+1, b8+1, b9+1, b10+1, b11+1, b12+2, b13+1, b14+2, b16+2, b19+2, b23+2];[y5+1, y8+1, y10+1, y10+1, y12+1];[M24+3]	[b5+1:572.28291, b6+1:701.32433, b7+1:800.39229, b8+1:929.43628, b9+1:1044.46163, b10+1:1207.52561, b11+1:1264.54422, b12+2:706.31163, b13+1:1468.63639, b14+2:784.35705, b16+2:908.41449, b19+2:1072.50390, b23+2:1369.67632];[y5+1:741.46674, y8+1:1101.60851, y10+1:1317.75480, y10+1:1349.72415, y12+1:1473.84000];[M24+3:962.15636]	[b5+1:0.00019, b6+1:-0.00099, b7+1:-0.00144, b8+1:-0.00004, b9+1:-0.00164, b10+1:-0.00099, b11+1:-0.00384, b12+2:-0.00048, b13+1:-0.00155, b14+2:0.00048, b16+2:-0.00074, b19+2:0.00341, b23+2:-0.00471];[y5+1:0.00097, y8+1:-0.00401, y10+1:-0.00173, y10+1:-0.00446, y12+1:-0.00640];[M24+3:-0.00109]	[b5+1:0.33, b6+1:-1.41, b7+1:-1.80, b8+1:-0.04, b9+1:-1.57, b10+1:-0.82, b11+1:-3.04, b12+2:-0.34, b13+1:-1.05, b14+2:0.31, b16+2:-0.41, b19+2:1.59, b23+2:-1.72];[y5+1:1.31, y8+1:-3.64, y10+1:-1.31, y10+1:-3.31, y12+1:-4.35];[M24+3:-0.38]	[b5+1:17837, b6+1:54973, b7+1:60065, b8+1:19430, b9+1:33637, b10+1:26834, b11+1:50269, b12+2:14175, b13+1:53787, b14+2:72893, b16+2:18607, b19+2:51181, b23+2:17767];[y5+1:13879, y8+1:13104, y10+1:44655, y10+1:17338, y12+1:13548];[M24+3:117354]	19		NS1	38	FQPESPSKLASAIQK	FQPESPSKLASAIQK(5)	1629.87	6.08538	{34464@[b2+1];[y6+1, y13+1, y13+2];[M15+2, M15+2]}{34465@[b2+1]}{34466@[b2+1];[y11+1]}	{34464@[b2+1:276.13415];[y6+1:617.36340, y13+1:1409.76063, y13+2:721.37168];[M15+2:842.94815, M15+2:858.93432]}{34465@[b2+1:276.13361]}{34466@[b2+1:276.13360];[y11+1:1183.66633]}	{34464@[b2+1:-0.00011];[y6+1:0.00170, y13+1:-0.00283, y13+2:0.00055];[M15+2:-0.00143, M15+2:-0.00117]}{34465@[b2+1:-0.00065]}{34466@[b2+1:-0.00067];[y11+1:-0.00178]}	{34464@[b2+1:-0.42];[y6+1:2.76, y13+1:-2.01, y13+2:0.38];[M15+2:-0.85, M15+2:-0.68]}{34465@[b2+1:-2.38]}{34466@[b2+1:-2.44];[y11+1:-1.50]}	{34464@[b2+1:14035];[y6+1:13364, y13+1:20468, y13+2:93004];[M15+2:173365, M15+2:330446]}{34465@[b2+1:298]}{34466@[b2+1:233];[y11+1:188]}	{34464@6}{34465@1}{34466@2}		25.1796	158	49	1;2	3	6	2
NS1	NS1	38	170	NS1NS138170	K	S	2	W:\Collaboration_Services\Raw_files_FPL\Fusion Lumos\2021\Zheng\20211204_ZS_WP_SV_ns1_xlms\2021-12-04-10-10-24\Task1-Calibrate\20211203_ZS_WP_SV_ns1_R2-calib.mzML	34491	34481	924.469	5	4617.31	Intra	K;S		NS1	170	AWNSLEVEDYGFGVFTTNIWLKLK	AWNSLEVEDYGFGVFTTNIWLKLK(22)	2829.44	16.0868	[b5+1, b6+1, b7+1, b8+1, b9+1, b10+1, b11+1, b12+1, b13+1, b14+2, b19+2];[y8+1, y9+1, y10+1, y10+1];[M24+3]	[b5+1:572.28169, b6+1:701.32451, b7+1:800.39284, b8+1:929.43884, b9+1:1044.46087, b10+1:1207.52158, b11+1:1264.54711, b12+1:1411.61386, b13+1:1468.63683, b14+2:784.35874, b19+2:1072.50126];[y8+1:1069.63631, y9+1:1170.68597, y10+1:1317.75671, y10+1:1349.71971];[M24+3:962.15635]	[b5+1:-0.00103, b6+1:-0.00080, b7+1:-0.00089, b8+1:0.00252, b9+1:-0.00240, b10+1:-0.00502, b11+1:-0.00095, b12+1:-0.00261, b13+1:-0.00110, b14+2:0.00386, b19+2:-0.00188];[y8+1:-0.00413, y9+1:-0.00215, y10+1:0.00018, y10+1:-0.00890];[M24+3:-0.00109]	[b5+1:-1.80, b6+1:-1.15, b7+1:-1.12, b8+1:2.71, b9+1:-2.30, b10+1:-4.16, b11+1:-0.75, b12+1:-1.85, b13+1:-0.75, b14+2:2.47, b19+2:-0.88];[y8+1:-3.86, y9+1:-1.84, y10+1:0.14, y10+1:-6.60];[M24+3:-0.38]	[b5+1:24294, b6+1:62741, b7+1:78375, b8+1:30735, b9+1:31107, b10+1:33145, b11+1:81805, b12+1:24388, b13+1:67714, b14+2:101905, b19+2:33486];[y8+1:23222, y9+1:17510, y10+1:62100, y10+1:20606];[M24+3:203640]	16		NS1	38	FQPESPSKLASAIQK	FQPESPSKLASAIQK(5)	1629.87	8.0871	{34491@[b2+1, b6+1];[y5+1, y11+1, y13+2, y13+2];[M15+2, M15+2]}{34493@[b2+1];[y13+1]}{34494@[b2+1, b13+1];[y11+1]}	{34491@[b2+1:276.13470, b6+1:740.32281];[y5+1:546.32561, y11+1:1215.64182, y13+2:705.38631, y13+2:721.37138];[M15+2:842.94990, M15+2:858.93420]}{34493@[b2+1:276.13361];[y13+1:1441.73341]}{34494@[b2+1:276.13360, b13+1:1410.73465];[y11+1:1183.66777]}	{34491@[b2+1:0.00043, b6+1:-0.00216];[y5+1:0.00102, y11+1:0.00163, y13+2:0.00187, y13+2:-0.00007];[M15+2:0.00207, M15+2:-0.00141]}{34493@[b2+1:-0.00065];[y13+1:-0.00214]}{34494@[b2+1:-0.00067, b13+1:0.00829];[y11+1:-0.00034]}	{34491@[b2+1:1.58, b6+1:-2.93];[y5+1:1.88, y11+1:1.35, y13+2:1.33, y13+2:-0.05];[M15+2:1.23, M15+2:-0.82]}{34493@[b2+1:-2.38];[y13+1:-1.49]}{34494@[b2+1:-2.44, b13+1:5.88];[y11+1:-0.29]}	{34491@[b2+1:17403, b6+1:18435];[y5+1:18265, y11+1:38625, y13+2:73409, y13+2:152551];[M15+2:177108, M15+2:404314]}{34493@[b2+1:426];[y13+1:703]}{34494@[b2+1:212, b13+1:145];[y11+1:140]}	{34491@8}{34493@2}{34494@3}		24.1739	157.997	22	1;2	3	6	5
NS1	NS1	38	170	NS1NS138170	K	S	3	W:\Collaboration_Services\Raw_files_FPL\Fusion Lumos\2021\Zheng\20211204_ZS_WP_SV_ns1_xlms\2021-12-04-10-10-24\Task1-Calibrate\20211203_ZS_WP_SV_ns1_R3-calib.mzML	33326	33322	924.47	5	4617.31	Intra	K;S		NS1	170	AWNSLEVEDYGFGVFTTNIWLKLK	AWNSLEVEDYGFGVFTTNIWLKLK(22)	2829.44	16.0845	[b5+1, b6+1, b7+1, b9+1, b10+1, b11+1, b12+2, b13+1, b14+2];[y5+1, y8+1, y9+1, y10+1, y10+1, y12+1];[M24+3]	[b5+1:572.28377, b6+1:701.32556, b7+1:800.39302, b9+1:1044.45982, b10+1:1207.52938, b11+1:1264.54750, b12+2:706.31381, b13+1:1468.63458, b14+2:784.35781];[y5+1:741.46551, y8+1:1069.63782, y9+1:1170.68756, y10+1:1317.75104, y10+1:1349.72294, y12+1:1473.83727];[M24+3:962.15497]	[b5+1:0.00105, b6+1:0.00025, b7+1:-0.00071, b9+1:-0.00344, b10+1:0.00278, b11+1:-0.00056, b12+2:0.00387, b13+1:-0.00336, b14+2:0.00199];[y5+1:-0.00026, y8+1:-0.00262, y9+1:-0.00056, y10+1:-0.00550, y10+1:-0.00567, y12+1:-0.00914];[M24+3:-0.00525]	[b5+1:1.84, b6+1:0.35, b7+1:-0.88, b9+1:-3.30, b10+1:2.30, b11+1:-0.44, b12+2:2.74, b13+1:-2.29, b14+2:1.27];[y5+1:-0.35, y8+1:-2.45, y9+1:-0.48, y10+1:-4.17, y10+1:-4.21, y12+1:-6.21];[M24+3:-1.82]	[b5+1:46069, b6+1:74383, b7+1:47477, b9+1:34060, b10+1:39743, b11+1:80187, b12+2:16716, b13+1:92263, b14+2:83946];[y5+1:19812, y8+1:28723, y9+1:23367, y10+1:60892, y10+1:23278, y12+1:33327];[M24+3:75974]	16		NS1	38	FQPESPSKLASAIQK	FQPESPSKLASAIQK(5)	1629.87	6.089	{33326@[y5+1, y7+1, y13+2, y13+2];[M15+2, M15+2]}{33329@[b2+1];[y13+1]}{33330@[b2+1]}{33331@[b2+1, b13+1]}{33332@[y13+1]}	{33326@[y5+1:546.32563, y7+1:730.44561, y13+2:705.38486, y13+2:721.37151];[M15+2:842.94840, M15+2:858.93452]}{33329@[b2+1:276.13350];[y13+1:1441.73280]}{33330@[b2+1:276.13350]}{33331@[b2+1:276.13348, b13+1:1410.73404]}{33332@[y13+1:1441.73278]}	{33326@[y5+1:0.00104, y7+1:-0.00016, y13+2:-0.00102, y13+2:0.00020];[M15+2:-0.00092, M15+2:-0.00077]}{33329@[b2+1:-0.00077];[y13+1:-0.00275]}{33330@[b2+1:-0.00077]}{33331@[b2+1:-0.00079, b13+1:0.00769]}{33332@[y13+1:-0.00276]}	{33326@[y5+1:1.91, y7+1:-0.22, y13+2:-0.72, y13+2:0.14];[M15+2:-0.55, M15+2:-0.45]}{33329@[b2+1:-2.80];[y13+1:-1.91]}{33330@[b2+1:-2.81]}{33331@[b2+1:-2.87, b13+1:5.45]}{33332@[y13+1:-1.92]}	{33326@[y5+1:15818, y7+1:18297, y13+2:101518, y13+2:113985];[M15+2:189992, M15+2:382655]}{33329@[b2+1:554];[y13+1:867]}{33330@[b2+1:566]}{33331@[b2+1:147, b13+1:215]}{33332@[y13+1:710]}	{33326@6}{33329@2}{33330@1}{33331@2}{33332@1}		22.1735	158.003	100	1;2	3	5	2
NS1	NS1	40	112	NS1NS140112	K	S	1	W:\Collaboration_Services\Raw_files_FPL\Fusion Lumos\2021\Zheng\20211204_ZS_WP_SV_ns1_xlms\2021-12-04-10-10-24\Task1-Calibrate\20211203_ZS_WP_SV_ns1_R1-calib.mzML	18975	18953	704.968	5	3519.81	Intra	K;S		NS1	112	SLRPQPTELKYSWK	SLRPQPTELKYSWK(10)	1731.93	17.0981	{18975@[y2+1, y3+1, y4+1, y5+1, y6+1, y7+1];[b3+1, b5+1, b7+2, b8+1, b9+2, b10+2, b11+2, b12+2, b13+2];[M14+2, M14+2]}{18977@[b5+1];[y9+1]}{18978@}	{18975@[y2+1:333.19142, y3+1:420.22403, y4+1:583.28702, y5+1:765.39246, y6+1:878.47704, y7+1:1007.51839];[b3+1:357.22318, b5+1:582.33591, b7+2:390.72165, b8+1:909.47874, b9+2:511.78479, b10+2:602.83711, b11+2:684.36796, b12+2:727.88532, b13+2:820.92413];[M14+2:893.97749, M14+2:909.96316]}{18977@[b5+1:582.33322];[y9+1:1237.59831]}{18978@}	{18975@[y2+1:-0.00070, y3+1:-0.00012, y4+1:-0.00045, y5+1:-0.00053, y6+1:-0.00002, y7+1:-0.00126];[b3+1:-0.00130, b5+1:0.00009, b7+2:-0.00024, b8+1:-0.00011, b9+2:-0.00063, b10+2:-0.00150, b11+2:-0.00313, b12+2:-0.00044, b13+2:-0.00213];[M14+2:-0.00094, M14+2:-0.00167]}{18977@[b5+1:-0.00260];[y9+1:0.00614]}{18978@}	{18975@[y2+1:-2.11, y3+1:-0.28, y4+1:-0.78, y5+1:-0.70, y6+1:-0.03, y7+1:-1.25];[b3+1:-3.64, b5+1:0.15, b7+2:-0.30, b8+1:-0.13, b9+2:-0.61, b10+2:-1.25, b11+2:-2.29, b12+2:-0.30, b13+2:-1.30];[M14+2:-0.52, M14+2:-0.92]}{18977@[b5+1:-4.48];[y9+1:4.96]}{18978@}	{18975@[y2+1:254947, y3+1:324968, y4+1:660893, y5+1:316235, y6+1:319830, y7+1:415519];[b3+1:169945, b5+1:761614, b7+2:532268, b8+1:186794, b9+2:452119, b10+2:658217, b11+2:253289, b12+2:285925, b13+2:258322];[M14+2:2283292, M14+2:10669471]}{18977@[b5+1:2046];[y9+1:10296]}{18978@}	{18975@17}{18977@2}{18978@0}		NS1	40	FQPESPSKLASAIQK	FQPESPSKLASAIQK(7)	1629.87	16.1171	{18975@[b2+1, b4+1, b5+1, b8+1, b9+2, b10+2];[y3+1, y4+1, y5+1, y6+1, y7+1, y10+1, y11+1, y13+1];[M15+2, M15+2]}{18979@[b2+1, b7+1];[y13+1]}{18980@[b2+1]}	{18975@[b2+1:276.13417, b4+1:502.22987, b5+1:589.26145, b8+1:955.45103, b9+2:534.77173, b10+2:570.28978];[y3+1:388.25562, y4+1:459.29229, y5+1:546.32429, y6+1:617.36173, y7+1:730.44575, y10+1:1096.63671, y11+1:1183.66647, y13+1:1441.73344];[M15+2:842.94879, M15+2:858.93420]}{18979@[b2+1:276.13330, b7+1:859.33325];[y13+1:1441.73178]}{18980@[b2+1:276.13330]}	{18975@[b2+1:-0.00009, b4+1:0.00025, b5+1:-0.00021, b8+1:-0.00094, b9+2:0.00016, b10+2:-0.00087];[y3+1:0.00017, y4+1:-0.00027, y5+1:-0.00030, y6+1:0.00003, y7+1:-0.00002, y10+1:0.00062, y11+1:-0.00164, y13+1:-0.00211];[M15+2:-0.00016, M15+2:-0.00142]}{18979@[b2+1:-0.00097, b7+1:0.00416];[y13+1:-0.00377]}{18980@[b2+1:-0.00097]}	{18975@[b2+1:-0.34, b4+1:0.50, b5+1:-0.35, b8+1:-0.99, b9+2:0.15, b10+2:-0.76];[y3+1:0.44, y4+1:-0.59, y5+1:-0.55, y6+1:0.05, y7+1:-0.02, y10+1:0.57, y11+1:-1.39, y13+1:-1.46];[M15+2:-0.09, M15+2:-0.83]}{18979@[b2+1:-3.51, b7+1:4.85];[y13+1:-2.62]}{18980@[b2+1:-3.51]}	{18975@[b2+1:1707569, b4+1:315007, b5+1:323537, b8+1:810674, b9+2:814451, b10+2:696935];[y3+1:182537, y4+1:398478, y5+1:2589124, y6+1:2897509, y7+1:1535231, y10+1:567261, y11+1:712462, y13+1:306514];[M15+2:1522758, M15+2:7062160]}{18979@[b2+1:3595, b7+1:4074];[y13+1:20205]}{18980@[b2+1:2668]}	{18975@16}{18979@3}{18980@1}		33.2153	158.002	43	2;2	4	5	53
NS1	NS1	40	112	NS1NS140112	S	K	2	W:\Collaboration_Services\Raw_files_FPL\Fusion Lumos\2021\Zheng\20211204_ZS_WP_SV_ns1_xlms\2021-12-04-10-10-24\Task1-Calibrate\20211203_ZS_WP_SV_ns1_R2-calib.mzML	18860	18820	704.969	5	3519.81	Intra	S;K		NS1	40	FQPESPSKLASAIQK	FQPESPSKLASAIQK(7)	1629.87	17.1088	{18860@[b2+1, b4+1, b5+1, b8+1, b9+1, b10+2];[y3+1, y4+1, y5+1, y6+1, y7+1, y10+2, y11+2, y13+2, y13+1];[M15+3, M15+2]}{18864@[b2+1];[y13+1]}{18865@[b2+1]}	{18860@[b2+1:276.13475, b4+1:502.23005, b5+1:589.26238, b8+1:955.45232, b9+1:1068.53581, b10+2:570.29087];[y3+1:388.25566, y4+1:459.29283, y5+1:546.32495, y6+1:617.36225, y7+1:730.44662, y10+2:548.82176, y11+2:592.33823, y13+2:705.38516, y13+1:1441.73510];[M15+3:562.30217, M15+2:858.93550]}{18864@[b2+1:276.13347];[y13+1:1441.73123]}{18865@[b2+1:276.13347]}	{18860@[b2+1:0.00048, b4+1:0.00042, b5+1:0.00073, b8+1:0.00035, b9+1:-0.00022, b10+2:0.00132];[y3+1:0.00021, y4+1:0.00027, y5+1:0.00036, y6+1:0.00054, y7+1:0.00086, y10+2:0.00017, y11+2:0.00108, y13+2:-0.00042, y13+1:-0.00044];[M15+3:0.00150, M15+2:0.00118]}{18864@[b2+1:-0.00080];[y13+1:-0.00431]}{18865@[b2+1:-0.00080]}	{18860@[b2+1:1.76, b4+1:0.84, b5+1:1.23, b8+1:0.37, b9+1:-0.21, b10+2:1.16];[y3+1:0.54, y4+1:0.59, y5+1:0.66, y6+1:0.88, y7+1:1.17, y10+2:0.16, y11+2:0.91, y13+2:-0.30, y13+1:-0.31];[M15+3:0.89, M15+2:0.69]}{18864@[b2+1:-2.90];[y13+1:-2.99]}{18865@[b2+1:-2.92]}	{18860@[b2+1:526882, b4+1:121049, b5+1:143745, b8+1:290046, b9+1:61096, b10+2:216630];[y3+1:78319, y4+1:167669, y5+1:862433, y6+1:977089, y7+1:554299, y10+2:72976, y11+2:100052, y13+2:193234, y13+1:128703];[M15+3:503262, M15+2:2298001]}{18864@[b2+1:2363];[y13+1:3554]}{18865@[b2+1:2426]}	{18860@17}{18864@2}{18865@1}		NS1	112	SLRPQPTELKYSWK	SLRPQPTELKYSWK(10)	1731.93	16.0484	{18860@[y2+1, y3+1, y4+1, y5+1, y6+1, y7+1];[b5+1, b7+2, b8+1, b9+2, b10+2, b11+2, b12+2, b13+2];[M14+3, M14+3]}{18862@[b12+1]}{18863@}	{18860@[y2+1:333.19240, y3+1:420.22464, y4+1:583.28845, y5+1:765.39485, y6+1:878.47651, y7+1:1007.52070];[b5+1:582.33623, b7+2:390.72232, b8+1:909.47885, b9+2:511.78555, b10+2:602.83769, b11+2:684.36993, b12+2:727.88488, b13+2:820.92447];[M14+3:596.32141, M14+3:606.97870]}{18862@[b12+1:1486.73412]}{18863@}	{18860@[y2+1:0.00028, y3+1:0.00049, y4+1:0.00097, y5+1:0.00185, y6+1:-0.00056, y7+1:0.00104];[b5+1:0.00041, b7+2:0.00110, b8+1:-0.00001, b9+2:0.00089, b10+2:-0.00035, b11+2:0.00081, b12+2:-0.00132, b13+2:-0.00145];[M14+3:0.00102, M14+3:0.00083]}{18862@[b12+1:-0.00176]}{18863@}	{18860@[y2+1:0.84, y3+1:1.17, y4+1:1.67, y5+1:2.43, y6+1:-0.63, y7+1:1.04];[b5+1:0.70, b7+2:1.41, b8+1:-0.01, b9+2:0.88, b10+2:-0.29, b11+2:0.59, b12+2:-0.91, b13+2:-0.88];[M14+3:0.57, M14+3:0.45]}{18862@[b12+1:-1.18]}{18863@}	{18860@[y2+1:89123, y3+1:101056, y4+1:293088, y5+1:145101, y6+1:113588, y7+1:121655];[b5+1:298812, b7+2:196458, b8+1:76314, b9+2:169384, b10+2:247333, b11+2:118290, b12+2:137587, b13+2:74377];[M14+3:942394, M14+3:117693]}{18862@[b12+1:1885]}{18863@}	{18860@16}{18862@1}{18863@0}		33.1572	158.005	19	2;2	4	3	7
NS1	NS1	40	112	NS1NS140112	K	S	2	W:\Collaboration_Services\Raw_files_FPL\Fusion Lumos\2021\Zheng\20211204_ZS_WP_SV_ns1_xlms\2021-12-04-10-10-24\Task1-Calibrate\20211203_ZS_WP_SV_ns1_R2-calib.mzML	17657	17638	739.892	4	2955.54	Intra	K;S		NS1	112	SLRPQPTELK	SLRPQPTELK(10)	1167.66	12.0903	{17657@[y2+1, y2+1, y5+1, y7+1, y8+2];[b3+1, b5+1, b7+1, b8+1, b9+2];[M10+1, M10+2]}{17661@[b5+1]}{17662@}	{17657@[y2+1:314.20793, y2+1:346.17982, y5+1:641.35306, y7+1:866.46511, y8+2:511.78525];[b3+1:357.22418, b5+1:582.33585, b7+1:780.43774, b8+1:909.47894, b9+2:511.78525];[M10+1:1222.67886, M10+2:627.82955]}{17661@[b5+1:582.33386]}{17662@}	{17657@[y2+1:0.00050, y2+1:0.00032, y5+1:0.00260, y7+1:0.00330, y8+2:0.00030];[b3+1:-0.00030, b5+1:0.00003, b7+1:0.00148, b8+1:0.00008, b9+2:0.00029];[M10+1:-0.00014, M10+2:0.00074]}{17661@[b5+1:-0.00196]}{17662@}	{17657@[y2+1:1.60, y2+1:0.91, y5+1:4.06, y7+1:3.82, y8+2:0.29];[b3+1:-0.85, b5+1:0.06, b7+1:1.89, b8+1:0.09, b9+2:0.29];[M10+1:-0.12, M10+2:0.59]}{17661@[b5+1:-3.38]}{17662@}	{17657@[y2+1:34463, y2+1:23013, y5+1:46373, y7+1:54423, y8+2:154568];[b3+1:25022, b5+1:106188, b7+1:36836, b8+1:138535, b9+2:154568];[M10+1:69607, M10+2:174770]}{17661@[b5+1:991]}{17662@}	{17657@12}{17661@1}{17662@0}		NS1	40	FQPESPSKLASAIQK	FQPESPSKLASAIQK(7)	1629.87	10.1984	{17657@[b2+1, b5+1];[y4+1, y5+1, y6+1, y7+1, y13+2, y13+2];[M15+2, M15+2]}{17659@[b2+1];[y13+1]}{17660@[b13+1]}	{17657@[b2+1:276.13373, b5+1:589.26231];[y4+1:459.29297, y5+1:546.32526, y6+1:617.36098, y7+1:730.44721, y13+2:705.38481, y13+2:721.37133];[M15+2:842.94882, M15+2:858.93535]}{17659@[b2+1:276.13361];[y13+1:1441.73340]}{17660@[b13+1:1410.73462]}	{17657@[b2+1:-0.00054, b5+1:0.00066];[y4+1:0.00042, y5+1:0.00067, y6+1:-0.00072, y7+1:0.00144, y13+2:-0.00113, y13+2:-0.00017];[M15+2:-0.00009, M15+2:0.00089]}{17659@[b2+1:-0.00066];[y13+1:-0.00215]}{17660@[b13+1:0.00826]}	{17657@[b2+1:-1.95, b5+1:1.12];[y4+1:0.91, y5+1:1.23, y6+1:-1.16, y7+1:1.98, y13+2:-0.80, y13+2:-0.12];[M15+2:-0.05, M15+2:0.52]}{17659@[b2+1:-2.38];[y13+1:-1.49]}{17660@[b13+1:5.86]}	{17657@[b2+1:96935, b5+1:22448];[y4+1:38724, y5+1:98804, y6+1:196992, y7+1:69691, y13+2:128708, y13+2:224437];[M15+2:336725, M15+2:1024128]}{17659@[b2+1:788];[y13+1:1621]}{17660@[b13+1:215]}	{17657@10}{17659@2}{17660@1}		22.2888	158.005	12	2;2	4	8	1
NS1	NS1	40	112	NS1NS140112	S	K	3	W:\Collaboration_Services\Raw_files_FPL\Fusion Lumos\2021\Zheng\20211204_ZS_WP_SV_ns1_xlms\2021-12-04-10-10-24\Task1-Calibrate\20211203_ZS_WP_SV_ns1_R3-calib.mzML	16968	16931	739.892	4	2955.54	Intra	S;K		NS1	40	FQPESPSKLASAIQK	FQPESPSKLASAIQK(7)	1629.87	19.1371	{16968@[b2+1, b4+1, b5+1, b8+1, b8+1, b9+2, b9+1, b10+2, b10+1];[y3+1, y4+1, y5+1, y6+1, y7+1, y10+1, y13+2, y13+1];[M15+3, M15+2]}{16973@[b2+1];[y10+1, y13+1]}{16974@[b2+1];[y11+1]}	{16968@[b2+1:276.13463, b4+1:502.23057, b5+1:589.26236, b8+1:955.45110, b8+1:987.42383, b9+2:534.77189, b9+1:1100.51028, b10+2:570.29035, b10+1:1171.54986];[y3+1:388.25564, y4+1:459.29293, y5+1:546.32509, y6+1:617.36233, y7+1:730.44641, y10+1:1128.60960, y13+2:705.38528, y13+1:1441.73489];[M15+3:562.30211, M15+2:858.93565]}{16973@[b2+1:276.13381];[y10+1:1128.60054, y13+1:1441.73443]}{16974@[b2+1:…	{16968@[b2+1:0.00036, b4+1:0.00095, b5+1:0.00071, b8+1:-0.00087, b8+1:-0.00022, b9+2:0.00048, b9+1:0.00217, b10+2:0.00028, b10+1:0.00463];[y3+1:0.00019, y4+1:0.00037, y5+1:0.00050, y6+1:0.00063, y7+1:0.00064, y10+1:0.00144, y13+2:-0.00018, y13+1:-0.00066];[M15+3:0.00133, M15+2:0.00149]}{16973@[b2+1:-0.00046];[y10+1:-0.00762, y13+1:-0.00111]}{16974@[b2+1:-0.00046];[y11+1:-0.00082]}	{16968@[b2+1:1.31, b4+1:1.89, b5+1:1.20, b8+1:-0.91, b8+1:-0.22, b9+2:0.45, b9+1:1.97, b10+2:0.25, b10+1:3.96];[y3+1:0.50, y4+1:0.81, y5+1:0.92, y6+1:1.03, y7+1:0.88, y10+1:1.27, y13+2:-0.13, y13+1:-0.46];[M15+3:0.79, M15+2:0.87]}{16973@[b2+1:-1.66];[y10+1:-6.76, y13+1:-0.77]}{16974@[b2+1:-1.67];[y11+1:-0.69]}	{16968@[b2+1:64978, b4+1:22806, b5+1:27719, b8+1:18115, b8+1:10727, b9+2:13855, b9+1:9651, b10+2:12407, b10+1:12302];[y3+1:19484, y4+1:25135, y5+1:82119, y6+1:121257, y7+1:59683, y10+1:10286, y13+2:124147, y13+1:32278];[M15+3:40662, M15+2:586368]}{16973@[b2+1:789];[y10+1:927, y13+1:987]}{16974@[b2+1:693];[y11+1:299]}	{16968@19}{16973@3}{16974@2}		NS1	112	SLRPQPTELK	SLRPQPTELK(10)	1167.66	14.1332	{16968@[y2+1, y2+1, y5+1, y5+1, y7+1, y7+1, y8+2];[b3+1, b5+1, b7+1, b8+1, b9+2];[M10+2, M10+2]}{16975@}{16976@}	{16968@[y2+1:314.20790, y2+1:346.17958, y5+1:641.35103, y5+1:673.32201, y7+1:866.46110, y7+1:898.42994, y8+2:511.78555];[b3+1:357.22488, b5+1:582.33578, b7+1:780.43560, b8+1:909.47885, b9+2:511.78555];[M10+2:611.84373, M10+2:627.82932]}{16975@}{16976@}	{16968@[y2+1:0.00048, y2+1:0.00007, y5+1:0.00057, y5+1:-0.00053, y7+1:-0.00070, y7+1:-0.00394, y8+2:0.00091];[b3+1:0.00041, b5+1:-0.00004, b7+1:-0.00066, b8+1:-0.00001, b9+2:0.00090];[M10+2:0.00117, M10+2:0.00028]}{16975@}{16976@}	{16968@[y2+1:1.52, y2+1:0.20, y5+1:0.88, y5+1:-0.79, y7+1:-0.81, y7+1:-4.39, y8+2:0.89];[b3+1:1.14, b5+1:-0.06, b7+1:-0.85, b8+1:-0.01, b9+2:0.88];[M10+2:0.96, M10+2:0.23]}{16975@}{16976@}	{16968@[y2+1:28304, y2+1:13675, y5+1:35638, y5+1:14659, y7+1:37171, y7+1:8706, y8+2:109552];[b3+1:50430, b5+1:94571, b7+1:23528, b8+1:103430, b9+2:109552];[M10+2:494764, M10+2:133597]}{16975@}{16976@}	{16968@14}{16975@0}{16976@0}		33.2703	158.006	9	2;2	4	1	2
NS1	NS1	40	112	NS1NS140112	S	K	3	W:\Collaboration_Services\Raw_files_FPL\Fusion Lumos\2021\Zheng\20211204_ZS_WP_SV_ns1_xlms\2021-12-04-10-10-24\Task1-Calibrate\20211203_ZS_WP_SV_ns1_R3-calib.mzML	18358	18329	704.969	5	3519.81	Intra	S;K		NS1	40	FQPESPSKLASAIQK	FQPESPSKLASAIQK(7)	1629.87	17.1317	{18358@[b2+1, b4+1, b5+1, b8+1, b8+1, b9+2, b10+2];[y3+1, y4+1, y5+1, y6+1, y7+1, y10+1, y11+1, y13+2];[M15+3, M15+2]}{18365@[b2+1];[y13+1]}{18366@[b2+1]}	{18358@[b2+1:276.13467, b4+1:502.23002, b5+1:589.26238, b8+1:955.45152, b8+1:987.42285, b9+2:534.77209, b10+2:570.29057];[y3+1:388.25584, y4+1:459.29267, y5+1:546.32484, y6+1:617.36214, y7+1:730.44608, y10+1:1096.63721, y11+1:1183.66806, y13+2:721.37159];[M15+3:562.30227, M15+2:858.93544]}{18365@[b2+1:276.13356];[y13+1:1441.73456]}{18366@[b2+1:276.13356]}	{18358@[b2+1:0.00040, b4+1:0.00039, b5+1:0.00072, b8+1:-0.00045, b8+1:-0.00120, b9+2:0.00086, b10+2:0.00071];[y3+1:0.00039, y4+1:0.00011, y5+1:0.00025, y6+1:0.00044, y7+1:0.00032, y10+1:0.00113, y11+1:-0.00005, y13+2:0.00035];[M15+3:0.00180, M15+2:0.00107]}{18365@[b2+1:-0.00070];[y13+1:-0.00098]}{18366@[b2+1:-0.00070]}	{18358@[b2+1:1.45, b4+1:0.78, b5+1:1.23, b8+1:-0.47, b8+1:-1.21, b9+2:0.81, b10+2:0.63];[y3+1:1.01, y4+1:0.23, y5+1:0.46, y6+1:0.71, y7+1:0.43, y10+1:1.03, y11+1:-0.05, y13+2:0.24];[M15+3:1.07, M15+2:0.63]}{18365@[b2+1:-2.56];[y13+1:-0.68]}{18366@[b2+1:-2.56]}	{18358@[b2+1:104513, b4+1:21034, b5+1:21509, b8+1:42202, b8+1:9128, b9+2:52955, b10+2:26235];[y3+1:11223, y4+1:22384, y5+1:147507, y6+1:162897, y7+1:82931, y10+1:38843, y11+1:31263, y13+2:132352];[M15+3:91631, M15+2:408535]}{18365@[b2+1:517];[y13+1:295]}{18366@[b2+1:204]}	{18358@17}{18365@2}{18366@1}		NS1	112	SLRPQPTELKYSWK	SLRPQPTELKYSWK(10)	1731.93	16.0535	{18358@[y2+1, y3+1, y4+1, y5+1, y6+1, y7+1];[b5+1, b7+2, b8+2, b9+2, b10+2, b11+2, b12+2, b13+2];[M14+3, M14+3]}{18363@}{18364@[b5+1]}	{18358@[y2+1:333.19225, y3+1:420.22464, y4+1:583.28792, y5+1:765.39259, y6+1:878.47727, y7+1:1007.51972];[b5+1:582.33628, b7+2:390.72225, b8+2:455.24324, b9+2:511.78523, b10+2:602.83811, b11+2:684.37005, b12+2:727.88565, b13+2:820.92710];[M14+3:596.32159, M14+3:606.97862]}{18363@}{18364@[b5+1:582.33378]}	{18358@[y2+1:0.00014, y3+1:0.00050, y4+1:0.00045, y5+1:-0.00041, y6+1:0.00021, y7+1:0.00007];[b5+1:0.00046, b7+2:0.00097, b8+2:0.00034, b9+2:0.00026, b10+2:0.00051, b11+2:0.00104, b12+2:0.00022, b13+2:0.00382];[M14+3:0.00156, M14+3:0.00059]}{18363@}{18364@[b5+1:-0.00205]}	{18358@[y2+1:0.41, y3+1:1.18, y4+1:0.77, y5+1:-0.54, y6+1:0.24, y7+1:0.07];[b5+1:0.80, b7+2:1.24, b8+2:0.38, b9+2:0.26, b10+2:0.42, b11+2:0.76, b12+2:0.15, b13+2:2.33];[M14+3:0.87, M14+3:0.32]}{18363@}{18364@[b5+1:-3.52]}	{18358@[y2+1:11130, y3+1:14593, y4+1:43078, y5+1:17278, y6+1:17893, y7+1:18128];[b5+1:42625, b7+2:24833, b8+2:24801, b9+2:40594, b10+2:42902, b11+2:20603, b12+2:20630, b13+2:11710];[M14+3:198516, M14+3:21669]}{18363@}{18364@[b5+1:735]}	{18358@16}{18363@0}{18364@1}		33.1852	158.005	20	2;2	4	3	7
NS1	NS1	48	112	NS1NS148112	K	K	1	W:\Collaboration_Services\Raw_files_FPL\Fusion Lumos\2021\Zheng\20211204_ZS_WP_SV_ns1_xlms\2021-12-04-10-10-24\Task1-Calibrate\20211203_ZS_WP_SV_ns1_R1-calib.mzML	16817	16782	624.656	6	3741.89	Intra	K;K		NS1	48	LASAIQKAHEEGICGIR	LASAIQKAHEEGIC[Common Fixed:Carbamidomethyl on C]GIR(7)	1851.96	18.1149	{16817@[y3+1, y4+1, y6+1, y9+2, y10+2, y11+2, y12+2, y13+3, y14+2, y14+2, y15+3, y15+2, y16+3, y16+2];[b5+1, b13+2];[M17+3, M17+3]}{16824@[y10+1]}{16825@[y10+1]}	{16817@[y3+1:345.22450, y4+1:505.25542, y6+1:675.35879, y9+2:535.75610, y10+2:571.27499, y11+2:678.31321, y12+2:726.35701, y13+3:522.26904, y14+2:818.41726, y14+2:834.40456, y15+3:574.95825, y15+2:877.91913, y16+3:598.63696, y16+2:913.43801];[b5+1:456.28160, b13+2:701.87019];[M17+3:636.33186, M17+3:646.98913]}{16824@[y10+1:1141.53331]}{16825@[y10+1:1141.53342]}	{16817@[y3+1:0.00002, y4+1:0.00030, y6+1:-0.00187, y9+2:0.00018, y10+2:0.00084, y11+2:-0.00032, y12+2:0.00078, y13+3:0.00253, y14+2:0.00009, y14+2:0.00261, y15+3:0.00101, y15+2:-0.00026, y16+3:0.00003, y16+2:0.00037];[b5+1:-0.00006, b13+2:0.00061];[M17+3:0.00069, M17+3:0.00041]}{16824@[y10+1:-0.00856]}{16825@[y10+1:-0.00844]}	{16817@[y3+1:0.06, y4+1:0.59, y6+1:-2.77, y9+2:0.17, y10+2:0.74, y11+2:-0.23, y12+2:0.54, y13+3:1.62, y14+2:0.05, y14+2:1.57, y15+3:0.59, y15+2:-0.15, y16+3:0.02, y16+2:0.20];[b5+1:-0.13, b13+2:0.43];[M17+3:0.36, M17+3:0.21]}{16824@[y10+1:-7.50]}{16825@[y10+1:-7.40]}	{16817@[y3+1:991154, y4+1:2448255, y6+1:475943, y9+2:452890, y10+2:1117751, y11+2:276479, y12+2:1171002, y13+3:474518, y14+2:304269, y14+2:361670, y15+3:1570454, y15+2:2504246, y16+3:256938, y16+2:298537];[b5+1:465406, b13+2:367281];[M17+3:4979088, M17+3:6431452]}{16824@[y10+1:7352]}{16825@[y10+1:2789]}	{16817@18}{16824@1}{16825@1}		NS1	112	SLRPQPTELKYSWK	SLRPQPTELKYSWK(10)	1731.93	18.0751	[y2+1, y3+1, y4+1, y5+1, y5+1, y7+1, y7+1, y9+2, y12+2];[b3+1, b5+1, b7+2, b8+1, b9+2, b12+2, b13+2];[M14+3, M14+3]	[y2+1:333.19218, y3+1:420.22374, y4+1:583.28737, y5+1:765.39297, y5+1:797.36557, y7+1:1007.51804, y7+1:1039.49418, y9+2:603.31589, y12+2:809.90724];[b3+1:357.22426, b5+1:582.33606, b7+2:390.72203, b8+1:909.47775, b9+2:511.78510, b12+2:727.88549, b13+2:836.91155];[M14+3:596.32140, M14+3:606.97884]	[y2+1:0.00006, y3+1:-0.00041, y4+1:-0.00010, y5+1:-0.00003, y5+1:0.00049, y7+1:-0.00161, y7+1:0.00244, y9+2:0.00441, y12+2:0.00257];[b3+1:-0.00022, b5+1:0.00024, b7+2:0.00052, b8+1:-0.00110, b9+2:-0.00001, b12+2:-0.00011, b13+2:0.00062];[M14+3:0.00101, M14+3:0.00125]	[y2+1:0.19, y3+1:-0.97, y4+1:-0.17, y5+1:-0.03, y5+1:0.62, y7+1:-1.60, y7+1:2.35, y9+2:3.66, y12+2:1.59];[b3+1:-0.63, b5+1:0.41, b7+2:0.67, b8+1:-1.21, b9+2:-0.01, b12+2:-0.07, b13+2:0.37];[M14+3:0.57, M14+3:0.69]	[y2+1:352290, y3+1:401294, y4+1:841598, y5+1:555201, y5+1:604007, y7+1:402834, y7+1:439403, y9+2:685659, y12+2:477158];[b3+1:414685, b5+1:1942379, b7+2:1179867, b8+1:429009, b9+2:974054, b12+2:345634, b13+2:379870];[M14+3:3276808, M14+3:2614288]	18		36.19	158.001	43	2;2	4	2	7
NS1	NS1	48	112	NS1NS148112	K	K	2	W:\Collaboration_Services\Raw_files_FPL\Fusion Lumos\2021\Zheng\20211204_ZS_WP_SV_ns1_xlms\2021-12-04-10-10-24\Task1-Calibrate\20211203_ZS_WP_SV_ns1_R2-calib.mzML	20519	20510	727.698	6	4360.15	Intra	K;K		NS1	112	SLRPQPTELKYSWKAWGK	SLRPQPTELKYSWK[DSSO:DSSO_hydro_K on K]AWGK(10)	2350.18	9.04072	[y3+1, y4+1, y5+1, y6+1, y7+1, y8+1];[b5+1, b9+2];[M18+3]	[y3+1:390.21315, y4+1:461.25129, y5+1:765.35983, y6+1:951.43962, y7+1:1038.46965, y8+1:1201.52933];[b5+1:582.33601, b9+2:511.78623];[M18+3:813.05925]	[y3+1:-0.00043, y4+1:0.00059, y5+1:-0.00013, y6+1:0.00035, y7+1:-0.00164, y8+1:-0.00530];[b5+1:0.00019, b9+2:0.00226];[M18+3:-0.00467]	[y3+1:-1.10, y4+1:1.29, y5+1:-0.17, y6+1:0.37, y7+1:-1.58, y8+1:-4.41];[b5+1:0.32, b9+2:2.22];[M18+3:-1.92]	[y3+1:191166, y4+1:258452, y5+1:102324, y6+1:207703, y7+1:160044, y8+1:70136];[b5+1:185062, b9+2:82216];[M18+3:241214]	9		NS1	48	LASAIQKAHEEGICGIR	LASAIQKAHEEGIC[Common Fixed:Carbamidomethyl on C]GIR(7)	1851.96	8.09554	{20519@[y3+1, y4+1, y10+2, y15+2, y15+2];[b5+1];[M17+3, M17+2]}{20521@[y7+1]}{20522@[y7+1, y10+1]}	{20519@[y3+1:345.22458, y4+1:505.25566, y10+2:571.27476, y15+2:861.93189, y15+2:877.91839];[b5+1:456.28096];[M17+3:636.33127, M17+2:969.97910]}{20521@[y7+1:804.40037]}{20522@[y7+1:804.40028, y10+1:1141.53373]}	{20519@[y3+1:0.00010, y4+1:0.00053, y10+2:0.00038, y15+2:-0.00266, y15+2:-0.00176];[b5+1:-0.00070];[M17+3:-0.00109, M17+2:-0.00150]}{20521@[y7+1:-0.00288]}{20522@[y7+1:-0.00297, y10+1:-0.00814]}	{20519@[y3+1:0.28, y4+1:1.05, y10+2:0.34, y15+2:-1.55, y15+2:-1.00];[b5+1:-1.54];[M17+3:-0.57, M17+2:-0.78]}{20521@[y7+1:-3.59]}{20522@[y7+1:-3.70, y10+1:-7.14]}	{20519@[y3+1:115682, y4+1:241944, y10+2:103437, y15+2:257408, y15+2:185244];[b5+1:75114];[M17+3:2311288, M17+2:225625]}{20521@[y7+1:1173]}{20522@[y7+1:123, y10+1:397]}	{20519@8}{20521@1}{20522@2}		17.1363	158.007	9	1;2	3	60	21
NS1	NS1	48	112	NS1NS148112	K	K	3	W:\Collaboration_Services\Raw_files_FPL\Fusion Lumos\2021\Zheng\20211204_ZS_WP_SV_ns1_xlms\2021-12-04-10-10-24\Task1-Calibrate\20211203_ZS_WP_SV_ns1_R3-calib.mzML	16066	16058	624.657	6	3741.9	Intra	K;K		NS1	112	SLRPQPTELKYSWK	SLRPQPTELKYSWK(10)	1731.93	16.0512	[y2+1, y3+1, y4+1, y5+1, y5+1, y7+1, y7+1, y12+2];[b3+1, b5+1, b7+2, b8+1, b9+2, b12+2];[M14+2, M14+2]	[y2+1:333.19138, y3+1:420.22295, y4+1:583.28623, y5+1:765.39361, y5+1:797.36415, y7+1:1007.51940, y7+1:1039.48743, y12+2:809.90574];[b3+1:357.22359, b5+1:582.33568, b7+2:390.72159, b8+1:909.47754, b9+2:511.78476, b12+2:727.88196];[M14+2:893.97693, M14+2:909.96274]	[y2+1:-0.00074, y3+1:-0.00120, y4+1:-0.00125, y5+1:0.00062, y5+1:-0.00092, y7+1:-0.00025, y7+1:-0.00430, y12+2:-0.00042];[b3+1:-0.00089, b5+1:-0.00015, b7+2:-0.00035, b8+1:-0.00131, b9+2:-0.00068, b12+2:-0.00715];[M14+2:-0.00206, M14+2:-0.00252]	[y2+1:-2.21, y3+1:-2.86, y4+1:-2.14, y5+1:0.81, y5+1:-1.16, y7+1:-0.25, y7+1:-4.14, y12+2:-0.26];[b3+1:-2.50, b5+1:-0.25, b7+2:-0.45, b8+1:-1.44, b9+2:-0.67, b12+2:-4.92];[M14+2:-1.15, M14+2:-1.39]	[y2+1:70292, y3+1:79028, y4+1:156730, y5+1:111125, y5+1:108818, y7+1:83275, y7+1:96975, y12+2:108172];[b3+1:78848, b5+1:298044, b7+2:156774, b8+1:91177, b9+2:205161, b12+2:77146];[M14+2:109155, M14+2:388883]	16		NS1	48	LASAIQKAHEEGICGIR	LASAIQKAHEEGIC[Common Fixed:Carbamidomethyl on C]GIR(7)	1851.96	12.1036	{16066@[y3+1, y4+1, y10+2, y12+2, y13+2, y13+2, y15+2, y15+2];[b5+1, b6+1];[M17+3, M17+3]}{16070@}{16071@}	{16066@[y3+1:345.22459, y4+1:505.25467, y10+2:571.27460, y12+2:726.35734, y13+2:782.89718, y13+2:798.88254, y15+2:861.93251, y15+2:877.91872];[b5+1:456.28202, b6+1:584.34354];[M17+3:636.33068, M17+3:646.98821]}{16070@}{16071@}	{16066@[y3+1:0.00011, y4+1:-0.00046, y10+2:0.00006, y12+2:0.00144, y13+2:-0.00294, y13+2:-0.00431, y15+2:-0.00143, y15+2:-0.00109];[b5+1:0.00036, b6+1:0.00330];[M17+3:-0.00288, M17+3:-0.00236]}{16070@}{16071@}	{16066@[y3+1:0.32, y4+1:-0.91, y10+2:0.06, y12+2:0.99, y13+2:-1.88, y13+2:-2.70, y15+2:-0.83, y15+2:-0.62];[b5+1:0.78, b6+1:5.66];[M17+3:-1.51, M17+3:-1.22]}{16070@}{16071@}	{16066@[y3+1:169841, y4+1:421915, y10+2:175558, y12+2:221267, y13+2:185809, y13+2:151621, y15+2:411550, y15+2:386678];[b5+1:79950, b6+1:63243];[M17+3:876823, M17+3:1346442]}{16070@}{16071@}	{16066@12}{16070@0}{16071@0}		28.1547	158.003	7	2;2	4	3	7
NS1	NS1	48	116	NS1NS148116	K	K	2	W:\Collaboration_Services\Raw_files_FPL\Fusion Lumos\2021\Zheng\20211204_ZS_WP_SV_ns1_xlms\2021-12-04-10-10-24\Task1-Calibrate\20211203_ZS_WP_SV_ns1_R2-calib.mzML	17778	17746	759.627	4	3034.48	Intra	K;K		NS1	48	LASAIQKAHEEGICGIR	LASAIQKAHEEGIC[Common Fixed:Carbamidomethyl on C]GIR(7)	1851.96	21.1956	{17778@[b4+1, b5+1, b6+1, b7+1];[y4+1, y6+1, y7+1, y9+1, y10+2, y11+2, y12+2, y12+2, y13+2, y13+2, y14+2, y14+2, y15+2, y15+2, y16+2];[M17+2, M17+2]}{17781@[y7+1]}{17782@[y7+1]}	{17778@[b4+1:343.19705, b5+1:456.28182, b6+1:584.34252, b7+1:766.44417];[y4+1:505.25531, y6+1:675.36036, y7+1:804.40359, y9+1:1070.50411, y10+2:571.27511, y11+2:662.32711, y12+2:726.35689, y12+2:742.34206, y13+2:782.89842, y13+2:798.88481, y14+2:818.41719, y14+2:834.40362, y15+2:861.93290, y15+2:877.91817, y16+2:897.45112];[M17+2:953.99366, M17+2:969.97906]}{17781@[y7+1:804.40018]}{17782@[y7+1:80…	{17778@[b4+1:-0.00054, b5+1:0.00016, b6+1:0.00228, b7+1:-0.00159];[y4+1:0.00018, y6+1:-0.00030, y7+1:0.00034, y9+1:-0.00065, y10+2:0.00107, y11+2:-0.00045, y12+2:0.00053, y12+2:-0.00120, y13+2:-0.00046, y13+2:0.00024, y14+2:-0.00005, y14+2:0.00073, y15+2:-0.00066, y15+2:-0.00219, y16+2:-0.00133];[M17+2:-0.00031, M17+2:-0.00159]}{17781@[y7+1:-0.00307]}{17782@[y7+1:-0.00308]}	{17778@[b4+1:-1.58, b5+1:0.36, b6+1:3.91, b7+1:-2.07];[y4+1:0.36, y6+1:-0.45, y7+1:0.43, y9+1:-0.61, y10+2:0.94, y11+2:-0.34, y12+2:0.36, y12+2:-0.81, y13+2:-0.29, y13+2:0.15, y14+2:-0.03, y14+2:0.44, y15+2:-0.38, y15+2:-1.25, y16+2:-0.74];[M17+2:-0.16, M17+2:-0.82]}{17781@[y7+1:-3.83]}{17782@[y7+1:-3.83]}	{17778@[b4+1:109618, b5+1:242225, b6+1:103517, b7+1:96758];[y4+1:189742, y6+1:120051, y7+1:112244, y9+1:104798, y10+2:430331, y11+2:379657, y12+2:1222079, y12+2:486253, y13+2:1073605, y13+2:427748, y14+2:389942, y14+2:191725, y15+2:2739396, y15+2:1242803, y16+2:275560];[M17+2:3417120, M17+2:8459609]}{17781@[y7+1:4067]}{17782@[y7+1:3681]}	{17778@21}{17781@1}{17782@1}		NS1	116	YSWKAWGK	YSWKAWGK(4)	1024.51	12.1075	{17778@[b2+1, b5+1, b6+1];[y3+1, y4+1, y5+1, y6+2, y6+1, y7+1, y7+1];[M8+2, M8+1]}{17783@[y2+1]}{17784@}	{17778@[b2+1:251.10303, b5+1:690.32410, b6+1:876.40348];[y3+1:390.21342, y4+1:461.25091, y5+1:643.35615, y6+2:415.22146, y6+1:861.40775, y7+1:916.46715, y7+1:948.43981];[M8+2:540.26912, M8+1:1111.50247]}{17783@[y2+1:204.13336]}{17784@}	{17778@[b2+1:0.00039, b5+1:-0.00048, b6+1:-0.00041];[y3+1:-0.00016, y4+1:0.00022, y5+1:-0.00006, y6+2:0.00010, y6+1:0.00014, y7+1:-0.00041, y7+1:0.00017];[M8+2:0.00007, M8+1:-0.00050]}{17783@[y2+1:-0.00091]}{17784@}	{17778@[b2+1:1.58, b5+1:-0.70, b6+1:-0.47];[y3+1:-0.41, y4+1:0.47, y5+1:-0.10, y6+2:0.12, y6+1:0.17, y7+1:-0.45, y7+1:0.18];[M8+2:0.06, M8+1:-0.45]}{17783@[y2+1:-4.46]}{17784@}	{17778@[b2+1:108732, b5+1:113513, b6+1:184903];[y3+1:214468, y4+1:403014, y5+1:337146, y6+2:429283, y6+1:436816, y7+1:354002, y7+1:214580];[M8+2:4236132, M8+1:4962172]}{17783@[y2+1:2955]}{17784@}	{17778@12}{17783@1}{17784@0}		33.3031	158.004	36	2;2	4	15	5
NS1	NS1	48	116	NS1NS148116	K	K	3	W:\Collaboration_Services\Raw_files_FPL\Fusion Lumos\2021\Zheng\20211204_ZS_WP_SV_ns1_xlms\2021-12-04-10-10-24\Task1-Calibrate\20211203_ZS_WP_SV_ns1_R3-calib.mzML	17210	17188	759.627	4	3034.48	Intra	K;K		NS1	48	LASAIQKAHEEGICGIR	LASAIQKAHEEGIC[Common Fixed:Carbamidomethyl on C]GIR(7)	1851.96	21.1786	{17210@[b3+1, b4+1, b5+1];[y4+1, y6+1, y7+1, y9+2, y10+2, y11+2, y12+2, y12+2, y13+2, y13+2, y14+2, y14+2, y15+3, y15+3, y16+2, y16+2];[M17+3, M17+2]}{17215@[y7+1]}{17216@[y7+1]}{17217@[y7+1, y10+1]}	{17210@[b3+1:272.16085, b4+1:343.19826, b5+1:456.28208];[y4+1:505.25564, y6+1:675.36013, y7+1:804.40246, y9+2:535.75698, y10+2:571.27469, y11+2:662.32894, y12+2:726.35702, y12+2:742.34339, y13+2:782.89877, y13+2:798.88602, y14+2:818.41638, y14+2:834.40349, y15+3:574.95801, y15+3:585.61535, y16+2:897.45201, y16+2:913.43780];[M17+3:636.33181, M17+2:969.97976]}{17215@[y7+1:804.40103]}{17216@[y7+1:80…	{17210@[b3+1:0.00037, b4+1:0.00066, b5+1:0.00041];[y4+1:0.00052, y6+1:-0.00053, y7+1:-0.00079, y9+2:0.00192, y10+2:0.00023, y11+2:0.00322, y12+2:0.00080, y12+2:0.00145, y13+2:0.00023, y13+2:0.00266, y14+2:-0.00166, y14+2:0.00048, y15+3:0.00029, y15+3:0.00026, y16+2:0.00046, y16+2:-0.00005];[M17+3:0.00053, M17+2:-0.00019]}{17215@[y7+1:-0.00222]}{17216@[y7+1:-0.00222]}{17217@[y7+1:-0.00229, y10+1:-…	{17210@[b3+1:1.36, b4+1:1.94, b5+1:0.91];[y4+1:1.02, y6+1:-0.78, y7+1:-0.98, y9+2:1.80, y10+2:0.20, y11+2:2.43, y12+2:0.55, y12+2:0.98, y13+2:0.15, y13+2:1.66, y14+2:-1.01, y14+2:0.29, y15+3:0.17, y15+3:0.15, y16+2:0.25, y16+2:-0.03];[M17+3:0.28, M17+2:-0.10]}{17215@[y7+1:-2.77]}{17216@[y7+1:-2.76]}{17217@[y7+1:-2.85, y10+1:-6.29]}	{17210@[b3+1:58418, b4+1:80516, b5+1:163442];[y4+1:134219, y6+1:107413, y7+1:99615, y9+2:103732, y10+2:369530, y11+2:307137, y12+2:611881, y12+2:263215, y13+2:673503, y13+2:169030, y14+2:254422, y14+2:140633, y15+3:360419, y15+3:87880, y16+2:300599, y16+2:85170];[M17+3:2728422, M17+2:5363806]}{17215@[y7+1:1952]}{17216@[y7+1:837]}{17217@[y7+1:333, y10+1:2988]}	{17210@21}{17215@1}{17216@1}{17217@2}		NS1	116	YSWKAWGK	YSWKAWGK(4)	1024.51	13.0765	{17210@[b2+1, b4+1, b5+1, b6+1];[y3+1, y4+1, y5+1, y6+1, y6+1, y7+1, y7+1];[M8+2, M8+2]}{17218@[y2+1, y7+1]}	{17210@[b2+1:251.10238, b4+1:619.28743, b5+1:690.32700, b6+1:876.40291];[y3+1:390.21367, y4+1:461.25173, y5+1:643.35696, y6+1:829.43513, y6+1:861.40766, y7+1:916.46732, y7+1:948.44328];[M8+2:540.26951, M8+2:556.25513]}{17218@[y2+1:204.13358, y7+1:916.46632]}	{17210@[b2+1:-0.00025, b4+1:-0.00004, b5+1:0.00242, b6+1:-0.00098];[y3+1:0.00009, y4+1:0.00104, y5+1:0.00075, y6+1:-0.00040, y6+1:0.00004, y7+1:-0.00024, y7+1:0.00364];[M8+2:0.00086, M8+2:0.00001]}{17218@[y2+1:-0.00068, y7+1:-0.00124]}	{17210@[b2+1:-1.00, b4+1:-0.06, b5+1:3.51, b6+1:-1.12];[y3+1:0.22, y4+1:2.26, y5+1:1.16, y6+1:-0.48, y6+1:0.05, y7+1:-0.26, y7+1:3.85];[M8+2:0.80, M8+2:0.01]}{17218@[y2+1:-3.37, y7+1:-1.35]}	{17210@[b2+1:84186, b4+1:92146, b5+1:57634, b6+1:111618];[y3+1:169275, y4+1:284885, y5+1:189313, y6+1:518133, y6+1:283945, y7+1:168583, y7+1:100344];[M8+2:2533572, M8+2:745582]}{17218@[y2+1:3526, y7+1:7014]}	{17210@13}{17218@2}		34.2551	158.002	37	2;2	4	2	5
NS1	NS1	69	101	NS1NS169101	K	K	2	W:\Collaboration_Services\Raw_files_FPL\Fusion Lumos\2021\Zheng\20211204_ZS_WP_SV_ns1_xlms\2021-12-04-10-10-24\Task1-Calibrate\20211203_ZS_WP_SV_ns1_R2-calib.mzML	30754	30751	993.489	5	4962.41	Intra	K;K		NS1	69	LENLMWKQITPELNHILSENEVK	LENLMWKQITPELN[Common Artifact:Deamidation on N]HILSENEVK(7)	2778.43	20.172	{30754@[b5+1, b6+1, b7+1, b8+1, b9+1, b9+1, b10+1, b10+1];[y6+1, y7+1, y8+1, y13+2, y14+2, y15+2, y16+2, y17+2, y18+2, y18+2];[M23+3, M23+2]}{30757@}{30758@[y4+1]}{30759@[b9+1];[y10+1]}{30760@[y10+1]}	{30754@[b5+1:601.30126, b6+1:787.38146, b7+1:969.48602, b8+1:1097.54112, b9+1:1210.62781, b9+1:1242.60409, b10+1:1311.67475, b10+1:1343.64713];[y6+1:705.34456, y7+1:818.42552, y8+1:931.50605, y13+2:761.89127, y14+2:812.41474, y15+2:868.95679, y16+2:932.98498, y17+2:1024.03654, y18+2:1117.07694, y18+2:1133.06435];[M23+3:945.15197, M23+2:1433.21002]}{30757@}{30758@[y4+1:489.26652]}{30759@[b9+1:1242…	{30754@[b5+1:-0.00015, b6+1:0.00074, b7+1:-0.00023, b8+1:-0.00370, b9+1:-0.00108, b9+1:0.00313, b10+1:-0.00182, b10+1:-0.00152];[y6+1:0.00320, y7+1:0.00009, y8+1:-0.00344, y13+2:0.00049, y14+2:-0.00024, y15+2:-0.00021, y16+2:-0.00240, y17+2:-0.00481, y18+2:-0.00331, y18+2:-0.00057];[M23+3:-0.00270, M23+2:-0.00337]}{30757@}{30758@[y4+1:-0.00022]}{30759@[b9+1:-0.00133];[y10+1:0.00431]}{30760@[y10+1…	{30754@[b5+1:-0.25, b6+1:0.94, b7+1:-0.24, b8+1:-3.37, b9+1:-0.89, b9+1:2.52, b10+1:-1.39, b10+1:-1.13];[y6+1:4.54, y7+1:0.12, y8+1:-3.70, y13+2:0.32, y14+2:-0.15, y15+2:-0.12, y16+2:-1.29, y17+2:-2.35, y18+2:-1.48, y18+2:-0.25];[M23+3:-0.95, M23+2:-1.18]}{30757@}{30758@[y4+1:-0.45]}{30759@[b9+1:-1.07];[y10+1:3.64]}{30760@[y10+1:2.42]}	{30754@[b5+1:37895, b6+1:39338, b7+1:160143, b8+1:23874, b9+1:59858, b9+1:55097, b10+1:52930, b10+1:22022];[y6+1:21809, y7+1:32163, y8+1:25306, y13+2:233823, y14+2:337813, y15+2:97797, y16+2:124115, y17+2:57621, y18+2:101204, y18+2:49741];[M23+3:538559, M23+2:63481]}{30757@}{30758@[y4+1:202]}{30759@[b9+1:247];[y10+1:616]}{30760@[y10+1:421]}	{30754@20}{30757@0}{30758@1}{30759@2}{30760@1}		NS1	101	MTIMTGDIKGIMQAGKR	MTIMTGDIK[DSSO:DSSO_hydro_K on K]GIMQAGKR(16)	2025.97	11.0527	[y3+1, y4+1, y5+1, y5+1, y6+1, y6+1, y8+1];[b7+1, b8+1];[M17+2, M17+2]	[y3+1:414.24569, y4+1:485.28198, y5+1:613.34075, y5+1:645.31345, y6+1:744.38129, y6+1:776.35296, y8+1:914.48554];[b7+1:750.31153, b8+1:863.39926];[M17+2:1040.99792, M17+2:1056.98263]	[y3+1:-0.00025, y4+1:-0.00107, y5+1:-0.00088, y5+1:-0.00026, y6+1:-0.00082, y6+1:-0.00123, y8+1:-0.00210];[b7+1:-0.00455, b8+1:-0.00088];[M17+2:-0.00121, M17+2:-0.00386]	[y3+1:-0.61, y4+1:-2.22, y5+1:-1.44, y5+1:-0.40, y6+1:-1.11, y6+1:-1.59, y8+1:-2.30];[b7+1:-6.07, b8+1:-1.02];[M17+2:-0.58, M17+2:-1.83]	[y3+1:23936, y4+1:21455, y5+1:33429, y5+1:20618, y6+1:94002, y6+1:62924, y8+1:86885];[b7+1:20328, b8+1:38148];[M17+2:111399, M17+2:141001]	11		31.2248	158.009	10	2;2	4	36	4
NS1	NS1	69	101	NS1NS169101	K	K	3	W:\Collaboration_Services\Raw_files_FPL\Fusion Lumos\2021\Zheng\20211204_ZS_WP_SV_ns1_xlms\2021-12-04-10-10-24\Task1-Calibrate\20211203_ZS_WP_SV_ns1_R3-calib.mzML	30995	30990	993.292	5	4961.42	Intra	K;K		NS1	69	LENLMWKQITPELNHILSENEVK	LENLMWKQITPELNHILSENEVK(7)	2777.44	16.1671	{30995@[b4+1, b5+1, b6+1, b7+1, b9+1, b9+1];[y7+1, y13+2, y14+2, y16+2, y17+2, y18+2, y18+2, y19+2];[M23+3, M23+2]}{30996@}{30997@[b2+1]}	{30995@[b4+1:470.26178, b5+1:601.30133, b6+1:787.37807, b7+1:969.49038, b9+1:1210.62778, b9+1:1242.60111];[y7+1:818.42991, y13+2:761.39910, y14+2:811.92364, y16+2:932.49266, y17+2:1023.54679, y18+2:1116.58463, y18+2:1132.56884, y19+2:1198.09926];[M23+3:944.82425, M23+2:1432.71777]}{30996@}{30997@[b2+1:243.13351]}	{30995@[b4+1:0.00086, b5+1:-0.00008, b6+1:-0.00266, b7+1:0.00413, b9+1:-0.00110, b9+1:0.00014];[y7+1:0.00448, y13+2:0.00018, y14+2:0.00158, y16+2:-0.00303, y17+2:-0.00029, y18+2:-0.00392, y18+2:-0.00758, y19+2:0.01278];[M23+3:-0.00183, M23+2:-0.00386]}{30996@}{30997@[b2+1:-0.00042]}	{30995@[b4+1:1.82, b5+1:-0.13, b6+1:-3.38, b7+1:4.27, b9+1:-0.91, b9+1:0.11];[y7+1:5.48, y13+2:0.12, y14+2:0.98, y16+2:-1.63, y17+2:-0.14, y18+2:-1.76, y18+2:-3.35, y19+2:5.34];[M23+3:-0.65, M23+2:-1.35]}{30996@}{30997@[b2+1:-1.74]}	{30995@[b4+1:192912, b5+1:192841, b6+1:224930, b7+1:1035218, b9+1:485343, b9+1:186120];[y7+1:208162, y13+2:1011200, y14+2:1680248, y16+2:716596, y17+2:326849, y18+2:876892, y18+2:505818, y19+2:340615];[M23+3:4193944, M23+2:444012]}{30996@}{30997@[b2+1:1747]}	{30995@16}{30996@0}{30997@1}		NS1	101	MTIMTGDIKGIMQAGKR	MTIMTGDIK[DSSO:DSSO_hydro_K on K]GIMQAGKR(16)	2025.97	8.04446	{30995@[y6+1, y6+1, y8+1, y8+1];[b7+1, b8+1];[M17+2, M17+2]}{30998@}{30999@}	{30995@[y6+1:744.38273, y6+1:776.35444, y8+1:914.48448, y8+1:946.46387];[b7+1:750.31359, b8+1:863.39680];[M17+2:1040.99985, M17+2:1056.98422]}{30998@}{30999@}	{30995@[y6+1:0.00062, y6+1:0.00024, y8+1:-0.00316, y8+1:0.00415];[b7+1:-0.00249, b8+1:-0.00334];[M17+2:0.00265, M17+2:-0.00069]}{30998@}{30999@}	{30995@[y6+1:0.83, y6+1:0.31, y8+1:-3.46, y8+1:4.39];[b7+1:-3.32, b8+1:-3.88];[M17+2:1.27, M17+2:-0.32]}{30998@}{30999@}	{30995@[y6+1:587044, y6+1:354224, y8+1:392257, y8+1:320711];[b7+1:165289, b8+1:261728];[M17+2:332960, M17+2:944366]}{30998@}{30999@}	{30995@8}{30998@0}{30999@0}		24.2115	158.01	3	2;2	4	2	7
NS1	NS1	69	87	NS1NS16987	K	T	2	W:\Collaboration_Services\Raw_files_FPL\Fusion Lumos\2021\Zheng\20211204_ZS_WP_SV_ns1_xlms\2021-12-04-10-10-24\Task1-Calibrate\20211203_ZS_WP_SV_ns1_R2-calib.mzML	30769	30751	1241.61	4	4962.41	Intra	K;T		NS1	69	LENLMWKQITPELNHILSENEVK	LENLMWKQITPELN[Common Artifact:Deamidation on N]HILSENEVK(7)	2778.43	9.11892	{30769@[y6+1, y7+1, y10+1, y11+1, y13+2, y14+1];[b11+1];[M23+2, M23+2]}{30771@[y4+1, y10+1]}	{30769@[y6+1:705.33665, y7+1:818.42255, y10+1:1183.59563, y11+1:1296.67006, y13+2:761.88887, y14+1:1623.82533];[b11+1:1408.72873];[M23+2:1417.22303, M23+2:1433.21020]}{30771@[y4+1:489.26650, y10+1:1183.59962]}	{30769@[y6+1:-0.00471, y7+1:-0.00287, y10+1:0.00029, y11+1:-0.00935, y13+2:-0.00431, y14+1:0.00289];[b11+1:-0.00060];[M23+2:-0.00527, M23+2:-0.00302]}{30771@[y4+1:-0.00023, y10+1:0.00427]}	{30769@[y6+1:-6.68, y7+1:-3.52, y10+1:0.25, y11+1:-7.22, y13+2:-2.83, y14+1:1.78];[b11+1:-0.43];[M23+2:-1.86, M23+2:-1.05]}{30771@[y4+1:-0.48, y10+1:3.61]}	{30769@[y6+1:5735, y7+1:6610, y10+1:13071, y11+1:6118, y13+2:9540, y14+1:8369];[b11+1:7337];[M23+2:101450, M23+2:155792]}{30771@[y4+1:13, y10+1:27]}	{30769@9}{30771@2}		NS1	87	MTIMTGDIKGIMQAGKR	MTIMTGDIKGIMQAGK[DSSO:DSSO_hydro_K on K]R(2)	2025.97	2.00491	[y5+1, y8+1]	[y5+1:735.34171, y8+1:1036.49266]	[y5+1:-0.00366, y8+1:0.00128]	[y5+1:-4.98, y8+1:1.23]	[y5+1:4743, y8+1:8230]	2		11.1238	158.009	26	2;0	2	1	-
NS1	NS1	69	87	NS1NS16987	K	T	3	W:\Collaboration_Services\Raw_files_FPL\Fusion Lumos\2021\Zheng\20211204_ZS_WP_SV_ns1_xlms\2021-12-04-10-10-24\Task1-Calibrate\20211203_ZS_WP_SV_ns1_R3-calib.mzML	30318	30312	993.29	5	4961.42	Intra	K;T		NS1	69	LENLMWKQITPELNHILSENEVK	LENLMWKQITPELNHILSENEVK(7)	2777.44	10.111	[b5+1, b6+1, b7+1];[y6+1, y7+1, y8+1, y13+2, y14+2, y15+2, y16+2]	[b5+1:601.29966, b6+1:787.37913, b7+1:969.48833];[y6+1:705.33938, y7+1:818.42224, y8+1:931.50531, y13+2:761.39689, y14+2:811.92080, y15+2:868.46233, y16+2:932.49114]	[b5+1:-0.00175, b6+1:-0.00159, b7+1:0.00209];[y6+1:-0.00198, y7+1:-0.00318, y8+1:-0.00417, y13+2:-0.00425, y14+2:-0.00411, y15+2:-0.00510, y16+2:-0.00607]	[b5+1:-2.91, b6+1:-2.02, b7+1:2.15];[y6+1:-2.82, y7+1:-3.89, y8+1:-4.49, y13+2:-2.79, y14+2:-2.53, y15+2:-2.94, y16+2:-3.26]	[b5+1:17268, b6+1:15275, b7+1:141874];[y6+1:12258, y7+1:44655, y8+1:10754, y13+2:69199, y14+2:245747, y15+2:65634, y16+2:93214]	10		NS1	87	MTIMTGDIKGIMQAGKR	MTIMTGDIKGIMQAGK[DSSO:DSSO_hydro_K on K]R(2)	2025.97	2.00634	[y6+1, y8+1]	[y6+1:866.38339, y8+1:1036.49235]	[y6+1:-0.00246, y8+1:0.00097]	[y6+1:-2.84, y8+1:0.94]	[y6+1:17541, y8+1:23381]	2		12.1173	158.002	1	0;0	0	-	-
NS1	NS1	69	94	NS1NS16994	K	K	1	W:\Collaboration_Services\Raw_files_FPL\Fusion Lumos\2021\Zheng\20211204_ZS_WP_SV_ns1_xlms\2021-12-04-10-10-24\Task1-Calibrate\20211203_ZS_WP_SV_ns1_R1-calib.mzML	31303	31287	930.066	5	4645.3	Intra	K;K		NS1	69	LENLMWKQITPELNHILSENEVK	LENLMWKQITPELNHILSENEVK(7)	2777.44	24.2171	{31303@[b4+1, b5+1, b6+1, b7+1, b7+1, b8+1, b9+1, b9+1, b10+1, b10+1];[y6+1, y7+1, y9+1, y13+2, y14+2, y15+2, y17+2, y17+2, y18+2, y18+2, y19+2, y19+2];[M23+3, M23+3]}{31307@[b2+1];[y13+1]}{31308@}	{31303@[b4+1:470.26127, b5+1:601.30130, b6+1:787.38106, b7+1:969.48698, b7+1:1001.46126, b8+1:1097.54234, b9+1:1210.62858, b9+1:1242.60228, b10+1:1311.67141, b10+1:1343.64875];[y6+1:705.33710, y7+1:818.42630, y9+1:1068.56587, y13+2:761.39927, y14+2:811.92347, y15+2:868.46472, y17+2:1023.54612, y17+2:1039.53292, y18+2:1116.58680, y18+2:1132.57317, y19+2:1182.10719, y19+2:1198.09267];[M23+3:944.825…	{31303@[b4+1:0.00035, b5+1:-0.00011, b6+1:0.00033, b7+1:0.00073, b7+1:0.00293, b8+1:-0.00249, b9+1:-0.00031, b9+1:0.00131, b10+1:-0.00516, b10+1:0.00011];[y6+1:-0.00426, y7+1:0.00088, y9+1:-0.00253, y13+2:0.00052, y14+2:0.00124, y15+2:-0.00033, y17+2:-0.00163, y17+2:-0.00010, y18+2:0.00043, y18+2:0.00107, y19+2:0.00072, y19+2:-0.00040];[M23+3:0.00075, M23+3:0.00053]}{31307@[b2+1:-0.00038];[y13+1:…	{31303@[b4+1:0.74, b5+1:-0.18, b6+1:0.42, b7+1:0.76, b7+1:2.93, b8+1:-2.27, b9+1:-0.25, b9+1:1.05, b10+1:-3.94, b10+1:0.08];[y6+1:-6.05, y7+1:1.07, y9+1:-2.37, y13+2:0.34, y14+2:0.76, y15+2:-0.19, y17+2:-0.80, y17+2:-0.05, y18+2:0.19, y18+2:0.47, y19+2:0.30, y19+2:-0.17];[M23+3:0.26, M23+3:0.18]}{31307@[b2+1:-1.59];[y13+1:6.05]}{31308@}	{31303@[b4+1:267260, b5+1:321541, b6+1:399363, b7+1:304497, b7+1:311208, b8+1:241072, b9+1:471954, b9+1:408709, b10+1:424680, b10+1:197803];[y6+1:183668, y7+1:638091, y9+1:173968, y13+2:2311024, y14+2:4302136, y15+2:1373658, y17+2:930180, y17+2:802509, y18+2:1272627, y18+2:871390, y19+2:1073155, y19+2:478870];[M23+3:3138398, M23+3:2550076]}{31307@[b2+1:1595];[y13+1:3903]}{31308@}	{31303@24}{31307@2}{31308@0}		NS1	94	MTIMTGDIKGIMQAGK	MTIM[Common Variable:Oxidation on M]TGDIKGIMQAGK(9)	1709.85	23.1344	{31303@[b4+1, b7+1, b8+1, b9+1, b9+1, b11+1, b11+1];[y4+1, y5+1, y7+1, y8+1, y8+1, y9+1, y10+1, y11+1, y11+1, y12+1, y12+1, y13+1, y14+2, y14+2];[M16+2, M16+2]}{31305@[y2+1, y5+1, y9+1]}{31306@[y5+1, y12+1]}	{31303@[b4+1:493.21491, b7+1:766.31347, b8+1:879.39743, b9+1:1061.50031, b9+1:1093.47141, b11+1:1231.60642, b11+1:1263.57608];[y4+1:403.23003, y5+1:534.27122, y7+1:704.37573, y8+1:886.48148, y8+1:918.45423, y9+1:1031.53569, y10+1:1146.56667, y11+1:1171.61467, y11+1:1203.59006, y12+1:1272.66139, y12+1:1304.63526, y13+1:1419.69728, y14+2:766.89384, y14+2:782.88165];[M16+2:882.93852, M16+2:898.92327…	{31303@[b4+1:0.00000, b7+1:0.00248, b8+1:0.00238, b9+1:-0.00026, b9+1:-0.00125, b11+1:0.00031, b11+1:-0.00210];[y4+1:0.00007, y5+1:0.00077, y7+1:-0.00024, y8+1:-0.00002, y8+1:0.00065, y9+1:-0.00195, y10+1:0.00209, y11+1:0.00070, y11+1:0.00402, y12+1:-0.00026, y12+1:0.00153, y13+1:0.00024, y14+2:-0.00070, y14+2:0.00284];[M16+2:0.00050, M16+2:-0.00210]}{31305@[y2+1:-0.00076, y5+1:-0.00334, y9+1:-0.…	{31303@[b4+1:0.01, b7+1:3.24, b8+1:2.71, b9+1:-0.25, b9+1:-1.14, b11+1:0.26, b11+1:-1.67];[y4+1:0.17, y5+1:1.45, y7+1:-0.34, y8+1:-0.02, y8+1:0.71, y9+1:-1.89, y10+1:1.82, y11+1:0.60, y11+1:3.34, y12+1:-0.20, y12+1:1.18, y13+1:0.17, y14+2:-0.46, y14+2:1.82];[M16+2:0.28, M16+2:-1.17]}{31305@[y2+1:-3.76, y5+1:-6.26, y9+1:-3.37]}{31306@[y5+1:-6.18, y12+1:3.73]}	{31303@[b4+1:165272, b7+1:207241, b8+1:140112, b9+1:203127, b9+1:178782, b11+1:246723, b11+1:252286];[y4+1:189428, y5+1:989377, y7+1:1173918, y8+1:292943, y8+1:439538, y9+1:141469, y10+1:130145, y11+1:194578, y11+1:270461, y12+1:217890, y12+1:232276, y13+1:132424, y14+2:205062, y14+2:259011];[M16+2:3341524, M16+2:4913421]}{31305@[y2+1:7451, y5+1:5900, y9+1:7228]}{31306@[y5+1:2351, y12+1:6769]}	{31303@23}{31305@3}{31306@2}		47.3514	158.002	59	2;2	4	4	3
NS1	NS1	69	94	NS1NS16994	K	K	1	W:\Collaboration_Services\Raw_files_FPL\Fusion Lumos\2021\Zheng\20211204_ZS_WP_SV_ns1_xlms\2021-12-04-10-10-24\Task1-Calibrate\20211203_ZS_WP_SV_ns1_R1-calib.mzML	30413	30383	958.089	5	4785.41	Intra	K;K		NS1	69	LENLMWKQITPELNHILSENEVK	LENLMWKQITPELNHILSENEVK(7)	2777.44	25.1761	{30413@[b3+1, b4+1, b5+1, b6+1, b8+1, b8+1, b9+1, b10+1, b10+1];[y6+1, y7+1, y8+1, y13+2, y14+2, y15+2, y16+2, y17+2, y17+2, y18+2, y18+2, y19+2, y19+2, y21+2];[M23+2, M23+2]}{30415@[b2+1];[y13+1]}{30416@}	{30413@[b3+1:357.17850, b4+1:470.26162, b5+1:601.30397, b6+1:787.38207, b8+1:1097.55096, b8+1:1129.52406, b9+1:1242.60145, b10+1:1311.66712, b10+1:1343.65163];[y6+1:705.34214, y7+1:818.42736, y8+1:931.51065, y13+2:761.39952, y14+2:811.92394, y15+2:868.46509, y16+2:932.49360, y17+2:1023.54576, y17+2:1039.53288, y18+2:1116.58571, y18+2:1132.56961, y19+2:1182.10703, y19+2:1198.09340, y21+2:1295.6701…	{30413@[b3+1:0.00164, b4+1:0.00070, b5+1:0.00256, b6+1:0.00135, b8+1:0.00614, b8+1:0.00716, b9+1:0.00048, b10+1:-0.00945, b10+1:0.00298];[y6+1:0.00078, y7+1:0.00194, y8+1:0.00116, y13+2:0.00102, y14+2:0.00219, y15+2:0.00041, y16+2:-0.00115, y17+2:-0.00234, y17+2:-0.00019, y18+2:-0.00177, y18+2:-0.00604, y19+2:0.00040, y19+2:0.00104, y21+2:-0.00037];[M23+2:-0.00120, M23+2:-0.00206]}{30415@[b2+1:-0…	{30413@[b3+1:4.59, b4+1:1.48, b5+1:4.26, b6+1:1.71, b8+1:5.60, b8+1:6.34, b9+1:0.39, b10+1:-7.21, b10+1:2.22];[y6+1:1.11, y7+1:2.37, y8+1:1.25, y13+2:0.67, y14+2:1.35, y15+2:0.24, y16+2:-0.62, y17+2:-1.14, y17+2:-0.09, y18+2:-0.79, y18+2:-2.67, y19+2:0.17, y19+2:0.44, y21+2:-0.14];[M23+2:-0.43, M23+2:-0.72]}{30415@[b2+1:-0.13];[y13+1:7.51]}{30416@}	{30413@[b3+1:12104, b4+1:8095, b5+1:15738, b6+1:22434, b8+1:9558, b8+1:6540, b9+1:23387, b10+1:17137, b10+1:8029];[y6+1:11265, y7+1:31003, y8+1:13600, y13+2:93900, y14+2:184672, y15+2:69243, y16+2:66738, y17+2:41672, y17+2:24545, y18+2:82551, y18+2:48676, y19+2:53910, y19+2:27719, y21+2:12536];[M23+2:54319, M23+2:39513]}{30415@[b2+1:68];[y13+1:233]}{30416@}	{30413@25}{30415@2}{30416@0}		NS1	94	MTIMTGDIKGIMQAGKR	MTIMTGDIKGIMQAGKR(9)	1849.96	17.117	[y5+1, y6+1, y8+1, y9+1, y9+1, y10+1, y10+1, y12+1, y12+1, y13+2, y13+1, y14+2, y15+2, y15+2];[b7+1, b16+1];[M17+2]	[y5+1:559.33080, y6+1:690.37200, y8+1:860.47724, y9+1:1042.58247, y9+1:1074.55396, y10+1:1155.66690, y10+1:1187.63370, y12+1:1327.71094, y12+1:1359.67842, y13+2:714.88637, y13+1:1460.73652, y14+2:780.40563, y15+2:836.94749, y15+2:852.93411];[b7+1:750.31484, b16+1:1730.85622];[M17+2:968.97692]	[y5+1:-0.00027, y6+1:0.00044, y8+1:0.00016, y9+1:-0.00013, y9+1:-0.00073, y10+1:0.00023, y10+1:-0.00505, y12+1:-0.00414, y12+1:-0.00874, y13+2:0.00271, y13+1:0.00169, y14+2:0.00075, y15+2:0.00039, y15+2:0.00155];[b7+1:-0.00123, b16+1:-0.00757];[M17+2:-0.00097]	[y5+1:-0.48, y6+1:0.64, y8+1:0.18, y9+1:-0.13, y9+1:-0.68, y10+1:0.20, y10+1:-4.26, y12+1:-3.12, y12+1:-6.43, y13+2:1.90, y13+1:1.16, y14+2:0.48, y15+2:0.23, y15+2:0.91];[b7+1:-1.64, b16+1:-4.37];[M17+2:-0.50]	[y5+1:8249, y6+1:25986, y8+1:46330, y9+1:16638, y9+1:13425, y10+1:22716, y10+1:12566, y12+1:13735, y12+1:13487, y13+2:20596, y13+1:13530, y14+2:27773, y15+2:25423, y15+2:17760];[b7+1:11969, b16+1:6808];[M17+2:353288]	17		42.293	158.007	27	2;1	3	8	34
NS1	NS1	69	94	NS1NS16994	K	K	1	W:\Collaboration_Services\Raw_files_FPL\Fusion Lumos\2021\Zheng\20211204_ZS_WP_SV_ns1_xlms\2021-12-04-10-10-24\Task1-Calibrate\20211203_ZS_WP_SV_ns1_R1-calib.mzML	32179	32175	993.29	5	4961.41	Intra	K;K		NS1	69	LENLMWKQITPELNHILSENEVK	LENLMWKQITPELNHILSENEVK(7)	2777.44	22.1348	{32179@[b4+1, b5+1, b6+1, b7+1, b7+1, b8+1, b9+1, b9+1, b10+1, b10+1];[y7+1, y13+2, y14+2, y15+2, y16+2, y17+2, y18+2, y18+2, y19+2, y19+2];[M23+2, M23+2]}{32180@[b2+1]}{32181@[y13+1]}	{32179@[b4+1:470.26125, b5+1:601.30037, b6+1:787.38036, b7+1:969.49061, b7+1:1001.45958, b8+1:1097.54630, b9+1:1210.62623, b9+1:1242.60070, b10+1:1311.67167, b10+1:1343.64424];[y7+1:818.42562, y13+2:761.39868, y14+2:811.92259, y15+2:868.46356, y16+2:932.49328, y17+2:1023.54355, y18+2:1116.58510, y18+2:1132.57116, y19+2:1182.10514, y19+2:1198.09172];[M23+2:1416.73255, M23+2:1432.71790]}{32180@[b2+…	{32179@[b4+1:0.00033, b5+1:-0.00104, b6+1:-0.00036, b7+1:0.00437, b7+1:0.00126, b8+1:0.00148, b9+1:-0.00266, b9+1:-0.00027, b10+1:-0.00490, b10+1:-0.00440];[y7+1:0.00020, y13+2:-0.00067, y14+2:-0.00052, y15+2:-0.00265, y16+2:-0.00179, y17+2:-0.00677, y18+2:-0.00299, y18+2:-0.00294, y19+2:-0.00340, y19+2:-0.00230];[M23+2:-0.00221, M23+2:-0.00359]}{32180@[b2+1:-0.00031]}{32181@[y13+1:0.00966]}	{32179@[b4+1:0.70, b5+1:-1.73, b6+1:-0.46, b7+1:4.51, b7+1:1.26, b8+1:1.35, b9+1:-2.20, b9+1:-0.22, b10+1:-3.73, b10+1:-3.28];[y7+1:0.24, y13+2:-0.44, y14+2:-0.32, y15+2:-1.53, y16+2:-0.96, y17+2:-3.31, y18+2:-1.34, y18+2:-1.30, y19+2:-1.44, y19+2:-0.96];[M23+2:-0.78, M23+2:-1.25]}{32180@[b2+1:-1.29]}{32181@[y13+1:6.35]}	{32179@[b4+1:299153, b5+1:734174, b6+1:812025, b7+1:3828281, b7+1:406187, b8+1:589951, b9+1:989076, b9+1:750676, b10+1:888817, b10+1:297572];[y7+1:494754, y13+2:2917549, y14+2:6561292, y15+2:1756603, y16+2:2612758, y17+2:1004111, y18+2:1831085, y18+2:1329102, y19+2:1354316, y19+2:722873];[M23+2:756776, M23+2:1449190]}{32180@[b2+1:6625]}{32181@[y13+1:4281]}	{32179@22}{32180@1}{32181@1}		NS1	94	MTIMTGDIKGIMQAGKR	MTIMTGDIKGIMQAGK[DSSO:DSSO_hydro_K on K]R(9)	2025.97	14.0547	{32179@[y3+1, y4+1, y6+1, y8+1];[b8+1, b9+1, b9+1, b11+1, b11+1, b12+1, b13+1, b14+1];[M17+2, M17+2]}{32182@}	{32179@[y3+1:536.24958, y4+1:607.28683, y6+1:866.38423, y8+1:1036.49338];[b8+1:863.40083, b9+1:1045.50901, b9+1:1077.48158, b11+1:1215.60552, b11+1:1247.57928, b12+1:1378.62878, b13+1:1506.68398, b14+1:1577.71499];[M17+2:1040.99902, M17+2:1056.98324]}{32182@}	{32179@[y3+1:-0.00010, y4+1:0.00004, y6+1:-0.00163, y8+1:0.00199];[b8+1:0.00069, b9+1:0.00335, b9+1:0.00384, b11+1:-0.00567, b11+1:-0.00399, b12+1:0.00502, b13+1:0.00165, b14+1:-0.00446];[M17+2:0.00099, M17+2:-0.00264]}{32182@}	{32179@[y3+1:-0.19, y4+1:0.06, y6+1:-1.88, y8+1:1.93];[b8+1:0.80, b9+1:3.21, b9+1:3.57, b11+1:-4.67, b11+1:-3.20, b12+1:3.65, b13+1:1.09, b14+1:-2.83];[M17+2:0.47, M17+2:-1.25]}{32182@}	{32179@[y3+1:314010, y4+1:364566, y6+1:1482824, y8+1:838916];[b8+1:687068, b9+1:598630, b9+1:782382, b11+1:576438, b11+1:1256074, b12+1:354548, b13+1:410851, b14+1:354324];[M17+2:1986157, M17+2:3130776]}{32182@}	{32179@14}{32182@0}		36.1895	157.998	41	2;2	4	11	10
NS1	NS1	69	94	NS1NS16994	K	K	1	W:\Collaboration_Services\Raw_files_FPL\Fusion Lumos\2021\Zheng\20211204_ZS_WP_SV_ns1_xlms\2021-12-04-10-10-24\Task1-Calibrate\20211203_ZS_WP_SV_ns1_R1-calib.mzML	29169	29132	933.266	5	4661.29	Intra	K;K		NS1	69	LENLMWKQITPELNHILSENEVK	LENLMWKQITPELNHILSENEVK(7)	2777.44	19.1659	[b5+1, b6+1, b8+1, b8+1, b9+1, b9+1, b10+1, b10+1];[y6+1, y7+1, y13+2, y14+2, y15+2, y17+2, y18+2, y18+2, y19+2, y21+2];[M23+3]	[b5+1:601.29807, b6+1:787.37513, b8+1:1097.53952, b8+1:1129.52124, b9+1:1210.62730, b9+1:1242.60520, b10+1:1311.68070, b10+1:1343.64875];[y6+1:705.34198, y7+1:818.42136, y13+2:761.39870, y14+2:811.92215, y15+2:868.46340, y17+2:1023.54361, y18+2:1116.58375, y18+2:1132.56936, y19+2:1182.10541, y21+2:1295.67018];[M23+3:944.82411]	[b5+1:-0.00334, b6+1:-0.00559, b8+1:-0.00530, b8+1:0.00434, b9+1:-0.00159, b9+1:0.00423, b10+1:0.00414, b10+1:0.00010];[y6+1:0.00062, y7+1:-0.00406, y13+2:-0.00062, y14+2:-0.00140, y15+2:-0.00297, y17+2:-0.00665, y18+2:-0.00569, y18+2:-0.00654, y19+2:-0.00284, y21+2:-0.00029];[M23+3:-0.00227]	[b5+1:-5.57, b6+1:-7.11, b8+1:-4.83, b8+1:3.84, b9+1:-1.32, b9+1:3.41, b10+1:3.16, b10+1:0.07];[y6+1:0.88, y7+1:-4.97, y13+2:-0.41, y14+2:-0.86, y15+2:-1.71, y17+2:-3.25, y18+2:-2.55, y18+2:-2.89, y19+2:-1.20, y21+2:-0.11];[M23+3:-0.80]	[b5+1:17524, b6+1:31170, b8+1:19674, b8+1:19089, b9+1:33998, b9+1:22523, b10+1:23045, b10+1:14359];[y6+1:12004, y7+1:31500, y13+2:142365, y14+2:301219, y15+2:83278, y17+2:48562, y18+2:74375, y18+2:43034, y19+2:82811, y21+2:25534];[M23+3:57444]	19		NS1	94	MTIMTGDIKGIMQAGK	M[Common Variable:Oxidation on M]TIMTGDIKGIM[Common Variable:Oxidation on M]QAGK(9)	1725.85	11.1131	{29169@[b4+1, b9+1, b9+1, b14+1];[y5+1, y7+1, y8+1, y11+1, y11+1];[M16+2, M16+2]}{29172@}{29173@[y11+1]}{29174@[y2+1, y5+1, y12+1]}{29175@[y9+1]}	{29169@[b4+1:493.21658, b9+1:1061.50202, b9+1:1093.47226, b14+1:1577.73989];[y5+1:550.26647, y7+1:720.36964, y8+1:902.47386, y11+1:1187.60552, y11+1:1219.58541];[M16+2:890.93439, M16+2:906.92052]}{29172@}{29173@[y11+1:1187.60106]}{29174@[y2+1:204.13350, y5+1:550.26711, y12+1:1288.66625]}{29175@[y9+1:1047.53426]}	{29169@[b4+1:0.00168, b9+1:0.00144, b9+1:-0.00040, b14+1:0.00270];[y5+1:0.00111, y7+1:-0.00124, y8+1:-0.00254, y11+1:-0.00336, y11+1:0.00445];[M16+2:-0.00269, M16+2:-0.00249]}{29172@}{29173@[y11+1:-0.00782]}{29174@[y2+1:-0.00077, y5+1:0.00175, y12+1:0.00969]}{29175@[y9+1:0.00171]}	{29169@[b4+1:3.41, b9+1:1.36, b9+1:-0.36, b14+1:1.71];[y5+1:2.02, y7+1:-1.73, y8+1:-2.82, y11+1:-2.83, y11+1:3.65];[M16+2:-1.51, M16+2:-1.38]}{29172@}{29173@[y11+1:-6.59]}{29174@[y2+1:-3.78, y5+1:3.18, y12+1:7.53]}{29175@[y9+1:1.63]}	{29169@[b4+1:11798, b9+1:15286, b9+1:14068, b14+1:15497];[y5+1:43054, y7+1:74695, y8+1:26270, y11+1:21279, y11+1:17228];[M16+2:192711, M16+2:306642]}{29172@}{29173@[y11+1:230]}{29174@[y2+1:351, y5+1:109, y12+1:698]}{29175@[y9+1:343]}	{29169@11}{29172@0}{29173@1}{29174@3}{29175@1}		30.279	158.005	50	1;2	3	4	12
NS1	NS1	69	94	NS1NS16994	K	K	1	W:\Collaboration_Services\Raw_files_FPL\Fusion Lumos\2021\Zheng\20211204_ZS_WP_SV_ns1_xlms\2021-12-04-10-10-24\Task1-Calibrate\20211203_ZS_WP_SV_ns1_R1-calib.mzML	31489	31468	996.49	5	4977.42	Intra	K;K		NS1	69	LENLMWKQITPELNHILSENEVK	LENLMWKQITPELNHILSENEVK(7)	2777.44	18.1578	{31489@[b4+1, b5+1, b6+1, b7+1, b9+1, b9+1, b10+1];[y7+1, y13+2, y14+2, y15+2, y16+2, y18+2, y18+2, y19+2, y19+2];[M23+3, M23+2]}{31491@[y10+1]}{31492@}	{31489@[b4+1:470.26214, b5+1:601.30045, b6+1:787.38058, b7+1:969.48046, b9+1:1210.62793, b9+1:1242.60028, b10+1:1311.66913];[y7+1:818.42793, y13+2:761.39996, y14+2:811.92310, y15+2:868.46528, y16+2:932.49352, y18+2:1116.58506, y18+2:1132.57154, y19+2:1182.10675, y19+2:1198.09413];[M23+3:944.82491, M23+2:1432.71938]}{31491@[y10+1:1182.60237]}{31492@}	{31489@[b4+1:0.00122, b5+1:-0.00096, b6+1:-0.00014, b7+1:-0.00579, b9+1:-0.00096, b9+1:-0.00069, b10+1:-0.00744];[y7+1:0.00250, y13+2:0.00190, y14+2:0.00049, y15+2:0.00079, y16+2:-0.00131, y18+2:-0.00306, y18+2:-0.00219, y19+2:-0.00016, y19+2:0.00251];[M23+3:0.00013, M23+2:-0.00063]}{31491@[y10+1:-0.00896]}{31492@}	{31489@[b4+1:2.60, b5+1:-1.60, b6+1:-0.18, b7+1:-5.98, b9+1:-0.79, b9+1:-0.56, b10+1:-5.67];[y7+1:3.06, y13+2:1.25, y14+2:0.30, y15+2:0.46, y16+2:-0.70, y18+2:-1.37, y18+2:-0.97, y19+2:-0.07, y19+2:1.05];[M23+3:0.05, M23+2:-0.22]}{31491@[y10+1:-7.58]}{31492@}	{31489@[b4+1:112282, b5+1:142718, b6+1:172473, b7+1:143346, b9+1:196393, b9+1:144124, b10+1:204871];[y7+1:171341, y13+2:881577, y14+2:1530202, y15+2:579342, y16+2:641714, y18+2:526250, y18+2:364991, y19+2:461718, y19+2:242524];[M23+3:3419823, M23+2:251369]}{31491@[y10+1:2792]}{31492@}	{31489@18}{31491@1}{31492@0}		NS1	94	MTIMTGDIKGIMQAGKR	M[Common Variable:Oxidation on M]TIMTGDIKGIMQAGK[DSSO:DSSO_hydro_K on K]R(9)	2041.97	11.0368	[y6+1, y8+1, y10+1];[b8+1, b9+1, b9+1, b11+1, b11+1, b12+1];[M17+2, M17+2]	[y6+1:866.38469, y8+1:1036.49358, y10+1:1363.64371];[b8+1:879.39936, b9+1:1061.50165, b9+1:1093.47037, b11+1:1231.60612, b11+1:1263.57639, b12+1:1394.61032];[M17+2:1048.99732, M17+2:1064.98326]	[y6+1:-0.00117, y8+1:0.00220, y10+1:-0.00934];[b8+1:0.00431, b9+1:0.00107, b9+1:-0.00229, b11+1:0.00001, b11+1:-0.00179, b12+1:-0.00835];[M17+2:0.00267, M17+2:0.00247]	[y6+1:-1.35, y8+1:2.12, y10+1:-6.85];[b8+1:4.91, b9+1:1.01, b9+1:-2.09, b11+1:0.01, b11+1:-1.42, b12+1:-5.99];[M17+2:1.27, M17+2:1.16]	[y6+1:195409, y8+1:207164, y10+1:82268];[b8+1:98669, b9+1:75872, b9+1:148698, b11+1:89706, b11+1:106294, b12+1:91259];[M17+2:511809, M17+2:767949]	11		29.1947	158.006	8	2;2	4	1	6
NS1	NS1	69	94	NS1NS16994	K	K	1	W:\Collaboration_Services\Raw_files_FPL\Fusion Lumos\2021\Zheng\20211204_ZS_WP_SV_ns1_xlms\2021-12-04-10-10-24\Task1-Calibrate\20211203_ZS_WP_SV_ns1_R1-calib.mzML	29081	29030	961.286	5	4801.4	Intra	K;K		NS1	69	LENLMWKQITPELNHILSENEVK	LENLMWKQITPELNHILSENEVK(7)	2777.44	14.1151	{29081@[b5+1, b6+1, b9+1];[y6+1, y7+1, y13+2, y14+2, y15+2, y16+2, y18+2, y18+2, y19+2, y21+3];[M23+2]}{29083@[y4+1]}{29084@[y13+1]}{29085@[y15+1]}	{29081@[b5+1:601.29922, b6+1:787.38096, b9+1:1210.63579];[y6+1:705.34019, y7+1:818.42281, y13+2:761.39990, y14+2:811.92309, y15+2:868.46402, y16+2:932.49400, y18+2:1116.58519, y18+2:1132.57179, y19+2:1182.10478, y21+3:874.77360];[M23+2:1432.71875]}{29083@[y4+1:489.26706]}{29084@[y13+1:1521.79983]}{29085@[y15+1:1735.93478]}	{29081@[b5+1:-0.00219, b6+1:0.00024, b9+1:0.00690];[y6+1:-0.00117, y7+1:-0.00261, y13+2:0.00177, y14+2:0.00048, y15+2:-0.00173, y16+2:-0.00034, y18+2:-0.00281, y18+2:-0.00168, y19+2:-0.00411, y21+3:0.00078];[M23+2:-0.00189]}{29083@[y4+1:0.00032]}{29084@[y13+1:0.00908]}{29085@[y15+1:0.01229]}	{29081@[b5+1:-3.65, b6+1:0.30, b9+1:5.71];[y6+1:-1.66, y7+1:-3.20, y13+2:1.16, y14+2:0.30, y15+2:-1.00, y16+2:-0.18, y18+2:-1.26, y18+2:-0.74, y19+2:-1.74, y21+3:0.30];[M23+2:-0.66]}{29083@[y4+1:0.66]}{29084@[y13+1:5.97]}{29085@[y15+1:7.09]}	{29081@[b5+1:5260, b6+1:10312, b9+1:6603];[y6+1:3537, y7+1:15197, y13+2:30283, y14+2:66456, y15+2:19039, y16+2:27112, y18+2:21170, y18+2:17487, y19+2:22698, y21+3:5875];[M23+2:23291]}{29083@[y4+1:51]}{29084@[y13+1:27]}{29085@[y15+1:31]}	{29081@14}{29083@1}{29084@1}{29085@1}		NS1	94	MTIMTGDIKGIMQAGKR	M[Common Variable:Oxidation on M]TIMTGDIKGIMQAGKR(9)	1865.95	9.08077	[y6+1, y8+1, y9+1, y9+1, y10+1, y10+1, y15+2];[M17+3, M17+2]	[y6+1:690.37253, y8+1:860.47544, y9+1:1042.58611, y9+1:1074.54902, y10+1:1155.66517, y10+1:1187.62992, y15+2:836.94779];[M17+3:640.99633, M17+2:976.97345]	[y6+1:0.00097, y8+1:-0.00165, y9+1:0.00350, y9+1:-0.00567, y10+1:-0.00150, y10+1:-0.00883, y15+2:0.00099];[M17+3:0.00406, M17+2:-0.00285]	[y6+1:1.41, y8+1:-1.92, y9+1:3.36, y9+1:-5.28, y10+1:-1.30, y10+1:-7.44, y15+2:0.59];[M17+3:2.12, M17+2:-1.46]	[y6+1:8810, y8+1:16579, y9+1:6929, y9+1:3646, y10+1:4710, y10+1:3859, y15+2:10309];[M17+3:7847, M17+2:129778]	9		23.1959	158.001	31	1;2	3	50	8
NS1	NS1	69	94	NS1NS16994	K	K	1	W:\Collaboration_Services\Raw_files_FPL\Fusion Lumos\2021\Zheng\20211204_ZS_WP_SV_ns1_xlms\2021-12-04-10-10-24\Task1-Calibrate\20211203_ZS_WP_SV_ns1_R1-calib.mzML	30961	30928	927.063	5	4630.28	Intra	K;K		NS1	69	LENLMWKQITPELNHILSENEVK	LENLMWKQITPELN[Common Artifact:Deamidation on N]HILSENEVK(7)	2778.43	16.1291	{30961@[b6+1, b7+1, b8+1, b9+1, b9+1, b10+1, b10+1];[y7+1, y10+1, y13+2, y14+2, y15+2, y18+2, y19+2];[M23+3, M23+3]}{30965@}{30966@}	{30961@[b6+1:787.37879, b7+1:1001.45130, b8+1:1129.51624, b9+1:1210.63146, b9+1:1242.59843, b10+1:1311.67421, b10+1:1343.65159];[y7+1:818.42632, y10+1:1183.59371, y13+2:761.89091, y14+2:812.41517, y15+2:868.95430, y18+2:1117.07581, y19+2:1182.59952];[M23+3:945.15235, M23+3:955.81018]}{30965@}{30966@}	{30961@[b6+1:-0.00193, b7+1:-0.00703, b8+1:-0.00067, b9+1:0.00258, b9+1:-0.00254, b10+1:-0.00236, b10+1:0.00294];[y7+1:0.00090, y10+1:-0.00164, y13+2:-0.00022, y14+2:0.00063, y15+2:-0.00518, y18+2:-0.00558, y19+2:0.00136];[M23+3:-0.00156, M23+3:-0.00013]}{30965@}{30966@}	{30961@[b6+1:-2.45, b7+1:-7.02, b8+1:-0.59, b9+1:2.13, b9+1:-2.05, b10+1:-1.80, b10+1:2.19];[y7+1:1.10, y10+1:-1.38, y13+2:-0.14, y14+2:0.39, y15+2:-2.99, y18+2:-2.50, y19+2:0.58];[M23+3:-0.55, M23+3:-0.05]}{30965@}{30966@}	{30961@[b6+1:8764, b7+1:8316, b8+1:6658, b9+1:8804, b9+1:9842, b10+1:9973, b10+1:6717];[y7+1:6707, y10+1:14307, y13+2:58903, y14+2:83905, y15+2:10634, y18+2:13933, y19+2:6604];[M23+3:35513, M23+3:46150]}{30965@}{30966@}	{30961@16}{30965@0}{30966@0}		NS1	94	MTIMTGDIKGIMQAGK	MTIMTGDIKGIMQAGK(9)	1693.86	7.05776	{30961@[y5+1, y7+1, y11+1, y12+1];[b8+1];[M16+2, M16+2]}{30963@[y9+1, y13+1]}{30964@[y12+1]}	{30961@[y5+1:534.27022, y7+1:704.37550, y11+1:1171.61481, y12+1:1304.63428];[b8+1:863.40667];[M16+2:874.93984, M16+2:890.92606]}{30963@[y9+1:1031.53470, y13+1:1435.66856]}{30964@[y12+1:1272.66846]}	{30961@[y5+1:-0.00022, y7+1:-0.00047, y11+1:0.00084, y12+1:0.00056];[b8+1:0.00653];[M16+2:-0.00195, M16+2:-0.00160]}{30963@[y9+1:-0.00294, y13+1:-0.00565]}{30964@[y12+1:0.00681]}	{30961@[y5+1:-0.42, y7+1:-0.67, y11+1:0.72, y12+1:0.43];[b8+1:7.58];[M16+2:-1.12, M16+2:-0.90]}{30963@[y9+1:-2.85, y13+1:-3.93]}{30964@[y12+1:5.36]}	{30961@[y5+1:17228, y7+1:28366, y11+1:6163, y12+1:6242];[b8+1:5780];[M16+2:35026, M16+2:51433]}{30963@[y9+1:36, y13+1:115]}{30964@[y12+1:92]}	{30961@7}{30963@2}{30964@1}		23.1868	157.994	46	2;2	4	8	2
NS1	NS1	69	94	NS1NS16994	K	K	1	W:\Collaboration_Services\Raw_files_FPL\Fusion Lumos\2021\Zheng\20211204_ZS_WP_SV_ns1_xlms\2021-12-04-10-10-24\Task1-Calibrate\20211203_ZS_WP_SV_ns1_R1-calib.mzML	30229	30207	930.067	5	4645.3	Intra	K;K		NS1	69	LENLMWKQITPELNHILSENEVK	LENLMWKQITPELNHILSENEVK(7)	2777.44	9.10064	[b3+1, b4+1, b5+1, b8+1];[y4+1, y7+1, y13+2, y14+2, y15+2]	[b3+1:357.17852, b4+1:470.26051, b5+1:601.30313, b8+1:1097.54223];[y4+1:489.26622, y7+1:818.42612, y13+2:761.39897, y14+2:811.92263, y15+2:868.46509]	[b3+1:0.00166, b4+1:-0.00042, b5+1:0.00172, b8+1:-0.00259];[y4+1:-0.00052, y7+1:0.00070, y13+2:-0.00009, y14+2:-0.00043, y15+2:0.00041]	[b3+1:4.66, b4+1:-0.89, b5+1:2.86, b8+1:-2.37];[y4+1:-1.07, y7+1:0.86, y13+2:-0.06, y14+2:-0.27, y15+2:0.24]	[b3+1:4165, b4+1:5228, b5+1:15143, b8+1:6153];[y4+1:5194, y7+1:27353, y13+2:39852, y14+2:116741, y15+2:39021]	9		NS1	94	MTIMTGDIKGIMQAGK	M[Common Variable:Oxidation on M]TIMTGDIKGIMQAGK(9)	1709.85	6.03455	[b4+1];[y5+1, y7+1, y8+1, y8+1];[M16+2]	[b4+1:493.21303];[y5+1:534.27170, y7+1:704.37607, y8+1:886.47892, y8+1:918.45640];[M16+2:882.93466]	[b4+1:-0.00187];[y5+1:0.00125, y7+1:0.00009, y8+1:-0.00257, y8+1:0.00283];[M16+2:-0.00723]	[b4+1:-3.80];[y5+1:2.35, y7+1:0.13, y8+1:-2.91, y8+1:3.08];[M16+2:-4.10]	[b4+1:5454];[y5+1:18368, y7+1:39250, y8+1:10698, y8+1:6477];[M16+2:8617]	6		15.1352	158.007	1	0;1	1	-	19
NS1	NS1	69	94	NS1NS16994	K	K	1	W:\Collaboration_Services\Raw_files_FPL\Fusion Lumos\2021\Zheng\20211204_ZS_WP_SV_ns1_xlms\2021-12-04-10-10-24\Task1-Calibrate\20211203_ZS_WP_SV_ns1_R1-calib.mzML	31469	31450	1245.36	4	4977.41	Intra	K;K		NS1	94	MTIMTGDIKGIMQAGKR	M[Common Variable:Oxidation on M]TIMTGDIKGIMQAGK[DSSO:DSSO_hydro_K on K]R(9)	2041.97	9.01756	[b7+1, b8+1, b9+1, b9+1, b11+1, b11+1];[y8+1];[M17+2, M17+2]	[b7+1:766.31118, b8+1:879.39727, b9+1:1061.50686, b9+1:1093.46745, b11+1:1231.60612, b11+1:1263.58258];[y8+1:1036.48743];[M17+2:1048.99394, M17+2:1064.97882]	[b7+1:0.00019, b8+1:0.00222, b9+1:0.00628, b9+1:-0.00520, b11+1:0.00001, b11+1:0.00440];[y8+1:-0.00396];[M17+2:-0.00407, M17+2:-0.00640]	[b7+1:0.25, b8+1:2.52, b9+1:5.92, b9+1:-4.76, b11+1:0.01, b11+1:3.49];[y8+1:-3.82];[M17+2:-1.94, M17+2:-3.01]	[b7+1:13031, b8+1:9199, b9+1:13318, b9+1:10203, b11+1:12642, b11+1:9315];[y8+1:9620];[M17+2:20459, M17+2:20696]	9		NS1	69	LENLMWKQITPELNHILSENEVK	LENLMWKQITPELNHILSENEVK(7)	2777.44	5.07171	{31469@[b11+1];[y13+1, y14+1];[M23+3, M23+2]}{31471@[b2+1];[y15+1]}{31472@[y13+1]}	{31469@[b11+1:1408.71918];[y13+1:1521.78961, y14+1:1622.82910];[M23+3:944.82614, M23+2:1432.71712]}{31471@[b2+1:243.13356];[y15+1:1735.93498]}{31472@[y13+1:1521.80150]}	{31469@[b11+1:-0.01015];[y13+1:-0.00114, y14+1:-0.00933];[M23+3:0.00384, M23+2:-0.00515]}{31471@[b2+1:-0.00038];[y15+1:0.01249]}{31472@[y13+1:0.01075]}	{31469@[b11+1:-7.21];[y13+1:-0.75, y14+1:-5.75];[M23+3:1.36, M23+2:-1.80]}{31471@[b2+1:-1.55];[y15+1:7.20]}{31472@[y13+1:7.07]}	{31469@[b11+1:10705];[y13+1:19630, y14+1:18684];[M23+3:17275, M23+2:417424]}{31471@[b2+1:104];[y15+1:115]}{31472@[y13+1:745]}	{31469@5}{31471@2}{31472@1}		14.0893	158.003	137	2;2	4	2	11
NS1	NS1	69	94	NS1NS16994	K	K	1	W:\Collaboration_Services\Raw_files_FPL\Fusion Lumos\2021\Zheng\20211204_ZS_WP_SV_ns1_xlms\2021-12-04-10-10-24\Task1-Calibrate\20211203_ZS_WP_SV_ns1_R1-calib.mzML	31414	31403	926.868	5	4629.31	Intra	K;K		NS1	69	LENLMWKQITPELNHILSENEVK	LENLMWKQITPELNHILSENEVK(7)	2777.44	7.12098	[b5+1, b6+1];[y7+1, y13+2, y14+2, y15+2, y16+2]	[b5+1:601.30051, b6+1:787.38258];[y7+1:818.42440, y13+2:761.39821, y14+2:811.92239, y15+2:868.46327, y16+2:932.49411]	[b5+1:-0.00090, b6+1:0.00186];[y7+1:-0.00103, y13+2:-0.00160, y14+2:-0.00093, y15+2:-0.00323, y16+2:-0.00012]	[b5+1:-1.51, b6+1:2.36];[y7+1:-1.26, y13+2:-1.05, y14+2:-0.57, y15+2:-1.86, y16+2:-0.07]	[b5+1:41404, b6+1:41200];[y7+1:116492, y13+2:266130, y14+2:750403, y15+2:229857, y16+2:46663]	7		NS1	94	MTIMTGDIKGIMQAGK	MTIMTGDIKGIMQAGK(9)	1693.86	6.03825	[y4+1, y5+1, y7+1, y8+1, y8+1, y9+1]	[y4+1:403.22938, y5+1:534.26974, y7+1:704.37466, y8+1:886.47800, y8+1:918.45528, y9+1:1031.54000]	[y4+1:-0.00058, y5+1:-0.00071, y7+1:-0.00131, y8+1:-0.00350, y8+1:0.00170, y9+1:0.00236]	[y4+1:-1.44, y5+1:-1.33, y7+1:-1.87, y8+1:-3.95, y8+1:1.86, y9+1:2.29]	[y4+1:19460, y5+1:67960, y7+1:237701, y8+1:95906, y8+1:27543, y9+1:23180]	6		13.1592	158.007	28	0;0	0	-	-
NS1	NS1	69	94	NS1NS16994	K	K	1	W:\Collaboration_Services\Raw_files_FPL\Fusion Lumos\2021\Zheng\20211204_ZS_WP_SV_ns1_xlms\2021-12-04-10-10-24\Task1-Calibrate\20211203_ZS_WP_SV_ns1_R1-calib.mzML	31377	31368	933.46	5	4662.26	Intra	K;K		NS1	69	LENLMWKQITPELNHILSENEVK	LENLMWKQ[Common Artifact:Deamidation on Q]ITPELNHILSENEVK(7)	2778.43	6.05683	[b6+1];[y7+1, y13+2, y14+2, y15+2];[M23+3]	[b6+1:787.37853];[y7+1:818.42127, y13+2:761.39900, y14+2:811.92241, y15+2:868.46343];[M23+3:945.15683]	[b6+1:-0.00220];[y7+1:-0.00416, y13+2:-0.00002, y14+2:-0.00089, y15+2:-0.00290];[M23+3:0.01187]	[b6+1:-2.79];[y7+1:-5.08, y13+2:-0.01, y14+2:-0.55, y15+2:-1.67];[M23+3:4.19]	[b6+1:10028];[y7+1:23788, y13+2:71098, y14+2:143510, y15+2:51025];[M23+3:22984]	6		NS1	94	MTIMTGDIKGIMQAGK	M[Common Variable:Oxidation on M]TIM[Common Variable:Oxidation on M]TGDIKGIMQAGK(9)	1725.85	5.03228	{31377@[y5+1, y7+1, y8+1, y12+1];[M16+2]}{31379@}	{31377@[y5+1:534.27089, y7+1:704.37480, y8+1:918.44999, y12+1:1272.66549];[M16+2:906.92001]}{31379@}	{31377@[y5+1:0.00045, y7+1:-0.00118, y8+1:-0.00359, y12+1:0.00385];[M16+2:-0.00352]}{31379@}	{31377@[y5+1:0.84, y7+1:-1.67, y8+1:-3.91, y12+1:3.03];[M16+2:-1.94]}{31379@}	{31377@[y5+1:27918, y7+1:35209, y8+1:9147, y12+1:9848];[M16+2:101033]}{31379@}	{31377@5}{31379@0}		11.0891	157.992	35	1;1	2	18	20
NS1	NS1	69	94	NS1NS16994	K	K	1	W:\Collaboration_Services\Raw_files_FPL\Fusion Lumos\2021\Zheng\20211204_ZS_WP_SV_ns1_xlms\2021-12-04-10-10-24\Task1-Calibrate\20211203_ZS_WP_SV_ns1_R1-calib.mzML	31469	31450	1245.61	4	4978.4	Intra	K;K		NS1	94	MTIMTGDIKGIMQAGKR	M[Common Variable:Oxidation on M]TIMTGDIKGIMQAGK[DSSO:DSSO_hydro_K on K]R(9)	2041.97	9.01756	[b7+1, b8+1, b9+1, b9+1, b11+1, b11+1];[y8+1];[M17+2, M17+2]	[b7+1:766.31118, b8+1:879.39727, b9+1:1061.50686, b9+1:1093.46745, b11+1:1231.60612, b11+1:1263.58258];[y8+1:1036.48743];[M17+2:1048.99394, M17+2:1064.97882]	[b7+1:0.00019, b8+1:0.00222, b9+1:0.00628, b9+1:-0.00520, b11+1:0.00001, b11+1:0.00440];[y8+1:-0.00396];[M17+2:-0.00407, M17+2:-0.00640]	[b7+1:0.25, b8+1:2.52, b9+1:5.92, b9+1:-4.76, b11+1:0.01, b11+1:3.49];[y8+1:-3.82];[M17+2:-1.94, M17+2:-3.01]	[b7+1:13031, b8+1:9199, b9+1:13318, b9+1:10203, b11+1:12642, b11+1:9315];[y8+1:9620];[M17+2:20459, M17+2:20696]	9		NS1	69	LENLMWKQITPELNHILSENEVK	LEN[Common Artifact:Deamidation on N]LMWKQITPELNHILSENEVK(7)	2778.43	2.00568	[y13+1, y14+1]	[y13+1:1521.78961, y14+1:1622.82910]	[y13+1:-0.00114, y14+1:-0.00933]	[y13+1:-0.75, y14+1:-5.75]	[y13+1:19630, y14+1:18684]	2		11.0232	158.004	137	2;0	2	2	-
NS1	NS1	69	94	NS1NS16994	K	K	2	W:\Collaboration_Services\Raw_files_FPL\Fusion Lumos\2021\Zheng\20211204_ZS_WP_SV_ns1_xlms\2021-12-04-10-10-24\Task1-Calibrate\20211203_ZS_WP_SV_ns1_R2-calib.mzML	28378	28334	933.266	5	4661.29	Intra	K;K		NS1	69	LENLMWKQITPELNHILSENEVK	LENLM[Common Variable:Oxidation on M]WKQITPELNHILSENEVK(7)	2793.44	15.162	{28378@[b5+1, b7+1, b8+1, b9+1, b9+1, b10+1];[y6+1, y7+1, y12+1, y13+2, y14+2, y15+2, y19+2];[M23+3, M23+3]}{28381@[b2+1, b8+1];[y13+1]}{28382@}	{28378@[b5+1:617.29706, b7+1:1017.45257, b8+1:1145.51880, b9+1:1226.62463, b9+1:1258.59502, b10+1:1327.66555];[y6+1:705.34047, y7+1:818.42688, y12+1:1424.74346, y13+2:761.39924, y14+2:811.92359, y15+2:868.46594, y19+2:1190.10577];[M23+3:950.15724, M23+3:960.81463]}{28381@[b2+1:243.13369, b8+1:1113.53499];[y13+1:1521.80084]}{28382@}	{28378@[b5+1:0.00074, b7+1:-0.00067, b8+1:0.00698, b9+1:0.00083, b9+1:-0.00087, b10+1:-0.00593];[y6+1:-0.00089, y7+1:0.00146, y12+1:0.00547, y13+2:0.00046, y14+2:0.00147, y15+2:0.00212, y19+2:0.00296];[M23+3:0.00222, M23+3:0.00229]}{28381@[b2+1:-0.00024, b8+1:-0.00475];[y13+1:0.01009]}{28382@}	{28378@[b5+1:1.20, b7+1:-0.66, b8+1:6.10, b9+1:0.68, b9+1:-0.69, b10+1:-4.47];[y6+1:-1.27, y7+1:1.78, y12+1:3.84, y13+2:0.30, y14+2:0.91, y15+2:1.22, y19+2:1.24];[M23+3:0.78, M23+3:0.80]}{28381@[b2+1:-1.00, b8+1:-4.27];[y13+1:6.64]}{28382@}	{28378@[b5+1:15693, b7+1:8290, b8+1:7193, b9+1:16186, b9+1:13582, b10+1:7300];[y6+1:7438, y7+1:19758, y12+1:8781, y13+2:85670, y14+2:131663, y15+2:45800, y19+2:19696];[M23+3:173202, M23+3:144310]}{28381@[b2+1:167, b8+1:74];[y13+1:94]}{28382@}	{28378@15}{28381@3}{28382@0}		NS1	94	MTIMTGDIKGIMQAGK	MTIMTGDIKGIM[Common Variable:Oxidation on M]QAGK(9)	1709.85	14.093	{28378@[y5+1, y7+1, y8+1, y11+1, y11+1, y12+1, y13+1];[b8+1, b9+1, b9+1, b11+1, b11+1];[M16+2, M16+2]}{28383@[y2+1, y5+1, y13+1];[b8+1]}{28384@}	{28378@[y5+1:550.26696, y7+1:720.37284, y8+1:902.47567, y11+1:1187.60602, y11+1:1219.58324, y12+1:1288.65545, y13+1:1419.69462];[b8+1:863.39435, b9+1:1045.51218, b9+1:1077.48012, b11+1:1215.61229, b11+1:1247.58841];[M16+2:882.93930, M16+2:898.92477]}{28383@[y2+1:204.13362, y5+1:550.26742, y13+1:1451.66864];[b8+1:863.40118]}{28384@}	{28378@[y5+1:0.00160, y7+1:0.00195, y8+1:-0.00074, y11+1:-0.00286, y11+1:0.00228, y12+1:-0.00110, y13+1:-0.00242];[b8+1:-0.00578, b9+1:0.00652, b9+1:0.00238, b11+1:0.00110, b11+1:0.00514];[M16+2:0.00204, M16+2:0.00091]}{28383@[y2+1:-0.00065, y5+1:0.00206, y13+1:-0.00048];[b8+1:0.00104]}{28384@}	{28378@[y5+1:2.92, y7+1:2.71, y8+1:-0.82, y11+1:-2.41, y11+1:1.87, y12+1:-0.86, y13+1:-1.71];[b8+1:-6.71, b9+1:6.24, b9+1:2.21, b11+1:0.90, b11+1:4.12];[M16+2:1.16, M16+2:0.51]}{28383@[y2+1:-3.20, y5+1:3.75, y13+1:-0.33];[b8+1:1.20]}{28384@}	{28378@[y5+1:43485, y7+1:53688, y8+1:15611, y11+1:12571, y11+1:14601, y12+1:16749, y13+1:12063];[b8+1:10153, b9+1:10841, b9+1:14002, b11+1:10465, b11+1:7336];[M16+2:76261, M16+2:106757]}{28383@[y2+1:94, y5+1:65, y13+1:212];[b8+1:205]}{28384@}	{28378@14}{28383@4}{28384@0}		29.255	158.005	9	2;2	4	1	3
NS1	NS1	69	94	NS1NS16994	K	K	2	W:\Collaboration_Services\Raw_files_FPL\Fusion Lumos\2021\Zheng\20211204_ZS_WP_SV_ns1_xlms\2021-12-04-10-10-24\Task1-Calibrate\20211203_ZS_WP_SV_ns1_R2-calib.mzML	30323	30303	1162.33	4	4645.3	Intra	K;K		NS1	94	MTIMTGDIKGIMQAGK	MTIMTGDIKGIM[Common Variable:Oxidation on M]QAGK(9)	1709.85	13.0665	{30323@[y5+1, y7+1, y8+1, y9+1, y11+1, y11+1, y12+1, y12+1, y13+1, y13+1];[b9+1];[M16+1, M16+2]}{30331@[y2+1];[b5+1]}	{30323@[y5+1:550.26581, y7+1:720.37111, y8+1:902.47722, y9+1:1015.55489, y11+1:1187.61170, y11+1:1219.58513, y12+1:1288.65483, y12+1:1320.63239, y13+1:1419.69490, y13+1:1451.67516];[b9+1:1045.50091];[M16+1:1764.86885, M16+2:898.92454]}{30331@[y2+1:204.13364];[b5+1:578.26754]}	{30323@[y5+1:0.00045, y7+1:0.00023, y8+1:0.00081, y9+1:-0.00558, y11+1:0.00282, y11+1:0.00417, y12+1:-0.00173, y12+1:0.00375, y13+1:-0.00215, y13+1:0.00604];[b9+1:-0.00475];[M16+1:-0.00043, M16+2:0.00046]}{30331@[y2+1:-0.00063];[b5+1:-0.00013]}	{30323@[y5+1:0.83, y7+1:0.31, y8+1:0.90, y9+1:-5.50, y11+1:2.38, y11+1:3.42, y12+1:-1.34, y12+1:2.84, y13+1:-1.51, y13+1:4.16];[b9+1:-4.55];[M16+1:-0.24, M16+2:0.26]}{30331@[y2+1:-3.11];[b5+1:-0.23]}	{30323@[y5+1:22954, y7+1:108415, y8+1:38130, y9+1:16139, y11+1:50060, y11+1:16260, y12+1:24831, y12+1:29493, y13+1:17964, y13+1:17288];[b9+1:15092];[M16+1:134777, M16+2:36855]}{30331@[y2+1:50];[b5+1:123]}	{30323@13}{30331@2}		NS1	69	LENLMWKQITPELNHILSENEVK	LENLMWKQITPELNHILSENEVK(7)	2777.44	12.0855	{30323@[b5+1, b7+1];[y6+1, y7+1, y13+1, y14+2, y15+2, y16+2, y18+2, y19+2];[M23+3, M23+3]}{30328@[b2+1]}{30329@}{30330@}	{30323@[b5+1:601.29744, b7+1:1001.46344];[y6+1:705.33926, y7+1:818.42175, y13+1:1521.78829, y14+2:811.92414, y15+2:868.46648, y16+2:932.49654, y18+2:1116.58995, y19+2:1182.10888];[M23+3:944.82555, M23+3:955.48227]}{30328@[b2+1:243.13368]}{30329@}{30330@}	{30323@[b5+1:-0.00397, b7+1:0.00511];[y6+1:-0.00210, y7+1:-0.00367, y13+1:-0.00245, y14+2:0.00259, y15+2:0.00320, y16+2:0.00473, y18+2:0.00673, y19+2:0.00410];[M23+3:0.00206, M23+3:0.00015]}{30328@[b2+1:-0.00025]}{30329@}{30330@}	{30323@[b5+1:-6.62, b7+1:5.11];[y6+1:-2.98, y7+1:-4.49, y13+1:-1.61, y14+2:1.59, y15+2:1.85, y16+2:2.54, y18+2:3.01, y19+2:1.74];[M23+3:0.73, M23+3:0.05]}{30328@[b2+1:-1.03]}{30329@}{30330@}	{30323@[b5+1:22979, b7+1:16750];[y6+1:13240, y7+1:14641, y13+1:58304, y14+2:67931, y15+2:28273, y16+2:37958, y18+2:68283, y19+2:59712];[M23+3:167903, M23+3:123357]}{30328@[b2+1:134]}{30329@}{30330@}	{30323@12}{30328@1}{30329@0}{30330@0}		25.152	158.005	32	2;2	4	12	3
NS1	NS1	69	94	NS1NS16994	K	K	2	W:\Collaboration_Services\Raw_files_FPL\Fusion Lumos\2021\Zheng\20211204_ZS_WP_SV_ns1_xlms\2021-12-04-10-10-24\Task1-Calibrate\20211203_ZS_WP_SV_ns1_R2-calib.mzML	31185	31180	926.868	5	4629.3	Intra	K;K		NS1	69	LENLMWKQITPELNHILSENEVK	LENLMWKQITPELNHILSENEVK(7)	2777.44	9.13244	[b4+1, b5+1, b6+1];[y7+1, y9+1, y10+1, y13+2, y14+2, y15+2]	[b4+1:470.26038, b5+1:601.30278, b6+1:787.38365];[y7+1:818.42729, y9+1:1068.56655, y10+1:1182.61602, y13+2:761.40003, y14+2:811.92436, y15+2:868.46559]	[b4+1:-0.00054, b5+1:0.00137, b6+1:0.00293];[y7+1:0.00187, y9+1:-0.00185, y10+1:0.00469, y13+2:0.00204, y14+2:0.00302, y15+2:0.00142]	[b4+1:-1.15, b5+1:2.29, b6+1:3.72];[y7+1:2.28, y9+1:-1.74, y10+1:3.97, y13+2:1.34, y14+2:1.86, y15+2:0.82]	[b4+1:49973, b5+1:95505, b6+1:118831];[y7+1:317020, y9+1:44395, y10+1:43518, y13+2:684822, y14+2:1906618, y15+2:519399]	9		NS1	94	MTIMTGDIKGIMQAGK	MTIMTGDIKGIMQAGK(9)	1693.86	5.03761	[y5+1, y7+1, y8+1, y8+1, y9+1]	[y5+1:534.27119, y7+1:704.37682, y8+1:886.48264, y8+1:918.45693, y9+1:999.56968]	[y5+1:0.00074, y7+1:0.00085, y8+1:0.00114, y8+1:0.00336, y9+1:0.00412]	[y5+1:1.40, y7+1:1.21, y8+1:1.29, y8+1:3.66, y9+1:4.12]	[y5+1:168401, y7+1:539396, y8+1:224936, y8+1:88324, y9+1:52318]	5		14.17	158.005	1	0;0	0	-	-
NS1	NS1	69	94	NS1NS16994	K	K	2	W:\Collaboration_Services\Raw_files_FPL\Fusion Lumos\2021\Zheng\20211204_ZS_WP_SV_ns1_xlms\2021-12-04-10-10-24\Task1-Calibrate\20211203_ZS_WP_SV_ns1_R2-calib.mzML	30107	30050	930.266	5	4646.29	Intra	K;K		NS1	94	MTIMTGDIKGIMQAGK	MTIMTGDIKGIM[Common Variable:Oxidation on M]QAGK(9)	1709.85	6.05774	{30107@[y4+1, y5+1, y7+1, y8+1];[M16+2, M16+2]}{30109@[y2+1];[b5+1]}	{30107@[y4+1:403.22896, y5+1:550.26468, y7+1:720.36879, y8+1:902.47236];[M16+2:882.93716, M16+2:898.92510]}{30109@[y2+1:204.13352];[b5+1:578.26722]}	{30107@[y4+1:-0.00100, y5+1:-0.00067, y7+1:-0.00210, y8+1:-0.00405];[M16+2:-0.00223, M16+2:0.00158]}{30109@[y2+1:-0.00074];[b5+1:-0.00045]}	{30107@[y4+1:-2.48, y5+1:-1.23, y7+1:-2.92, y8+1:-4.50];[M16+2:-1.27, M16+2:0.88]}{30109@[y2+1:-3.66];[b5+1:-0.77]}	{30107@[y4+1:3670, y5+1:5444, y7+1:4774, y8+1:4901];[M16+2:22591, M16+2:18231]}{30109@[y2+1:31];[b5+1:16]}	{30107@6}{30109@2}		NS1	69	LENLMWKQITPELNHILSENEVK	LENLMWKQ[Common Artifact:Deamidation on Q]ITPELNHILSENEVK(7)	2778.43	5.05874	[b5+1];[y7+1, y14+2, y15+2];[M23+3]	[b5+1:601.30196];[y7+1:818.42949, y14+2:811.92096, y15+2:868.46300];[M23+3:955.81179]	[b5+1:0.00055];[y7+1:0.00407, y14+2:-0.00378, y15+2:-0.00376];[M23+3:0.00469]	[b5+1:0.92];[y7+1:4.97, y14+2:-2.33, y15+2:-2.17];[M23+3:1.64]	[b5+1:3073];[y7+1:4840, y14+2:33530, y15+2:6508];[M23+3:12690]	5		11.1165	158.015	85	2;1	3	6	3
NS1	NS1	69	94	NS1NS16994	K	K	2	W:\Collaboration_Services\Raw_files_FPL\Fusion Lumos\2021\Zheng\20211204_ZS_WP_SV_ns1_xlms\2021-12-04-10-10-24\Task1-Calibrate\20211203_ZS_WP_SV_ns1_R2-calib.mzML	29545	29496	930.068	5	4645.3	Intra	K;K		NS1	69	LENLMWKQITPELNHILSENEVK	LENLMWKQITPELNHILSENEVK(7)	2777.44	6.11023	[b5+1, b6+1];[y7+1, y13+2, y14+2, y15+2]	[b5+1:601.30283, b6+1:787.38195];[y7+1:818.42457, y13+2:761.39713, y14+2:811.92065, y15+2:868.46181]	[b5+1:0.00142, b6+1:0.00123];[y7+1:-0.00085, y13+2:-0.00377, y14+2:-0.00440, y15+2:-0.00615]	[b5+1:2.36, b6+1:1.56];[y7+1:-1.04, y13+2:-2.48, y14+2:-2.71, y15+2:-3.54]	[b5+1:7210, b6+1:7708];[y7+1:13933, y13+2:31607, y14+2:97128, y15+2:23389]	6		NS1	94	MTIMTGDIKGIMQAGK	MTIMTGDIKGIM[Common Variable:Oxidation on M]QAGK(9)	1709.85	3.02005	[y5+1, y7+1, y8+1]	[y5+1:550.26387, y7+1:720.36989, y8+1:934.45354]	[y5+1:-0.00149, y7+1:-0.00100, y8+1:0.00505]	[y5+1:-2.71, y7+1:-1.39, y8+1:5.41]	[y5+1:6018, y7+1:22473, y8+1:4422]	3		9.13028	158.008	1	0;0	0	-	-
NS1	NS1	69	94	NS1NS16994	K	K	3	W:\Collaboration_Services\Raw_files_FPL\Fusion Lumos\2021\Zheng\20211204_ZS_WP_SV_ns1_xlms\2021-12-04-10-10-24\Task1-Calibrate\20211203_ZS_WP_SV_ns1_R3-calib.mzML	29913	29885	930.067	5	4645.3	Intra	K;K		NS1	69	LENLMWKQITPELNHILSENEVK	LENLMWKQITPELNHILSENEVK(7)	2777.44	28.2206	{29913@[b3+1, b4+1, b5+1, b6+1, b7+1, b7+1, b8+1, b8+1, b9+1, b9+1, b10+1, b10+1];[y7+1, y9+1, y13+2, y14+2, y15+2, y16+2, y17+2, y17+2, y18+2, y18+2, y19+2, y19+2, y20+2, y21+2];[M23+3, M23+3]}{29917@}{29918@}	{29913@[b3+1:357.17720, b4+1:470.26141, b5+1:601.30179, b6+1:787.38156, b7+1:969.48814, b7+1:1001.46202, b8+1:1097.54614, b8+1:1129.51989, b9+1:1210.62925, b9+1:1242.60090, b10+1:1311.67129, b10+1:1343.64923];[y7+1:818.42580, y9+1:1068.56524, y13+2:761.39958, y14+2:811.92361, y15+2:868.46548, y16+2:932.49388, y17+2:1023.54680, y17+2:1039.53242, y18+2:1116.58754, y18+2:1132.57315, y19+2:1182.10810…	{29913@[b3+1:0.00033, b4+1:0.00049, b5+1:0.00038, b6+1:0.00084, b7+1:0.00190, b7+1:0.00370, b8+1:0.00132, b8+1:0.00299, b9+1:0.00036, b9+1:-0.00006, b10+1:-0.00527, b10+1:0.00058];[y7+1:0.00038, y9+1:-0.00316, y13+2:0.00113, y14+2:0.00151, y15+2:0.00119, y16+2:-0.00058, y17+2:-0.00026, y17+2:-0.00112, y18+2:0.00189, y18+2:0.00104, y19+2:0.00253, y19+2:0.00227, y20+2:-0.00376, y21+2:-0.00071];[M23…	{29913@[b3+1:0.94, b4+1:1.04, b5+1:0.63, b6+1:1.07, b7+1:1.96, b7+1:3.69, b8+1:1.20, b8+1:2.65, b9+1:0.30, b9+1:-0.05, b10+1:-4.02, b10+1:0.43];[y7+1:0.46, y9+1:-2.96, y13+2:0.74, y14+2:0.93, y15+2:0.69, y16+2:-0.31, y17+2:-0.13, y17+2:-0.54, y18+2:0.85, y18+2:0.46, y19+2:1.07, y19+2:0.95, y20+2:-1.52, y21+2:-0.27];[M23+3:0.48, M23+3:0.28]}{29917@}{29918@}	{29913@[b3+1:191404, b4+1:241763, b5+1:390885, b6+1:328375, b7+1:314396, b7+1:264926, b8+1:249521, b8+1:211699, b9+1:515080, b9+1:426374, b10+1:391975, b10+1:153293];[y7+1:558291, y9+1:127636, y13+2:2077360, y14+2:3942300, y15+2:1326788, y16+2:460551, y17+2:926748, y17+2:674843, y18+2:1487584, y18+2:775248, y19+2:1480449, y19+2:489020, y20+2:217351, y21+2:173920];[M23+3:2758875, M23+3:2745576]}{2…	{29913@28}{29917@0}{29918@0}		NS1	94	MTIMTGDIKGIMQAGK	MTIM[Common Variable:Oxidation on M]TGDIKGIMQAGK(9)	1709.85	22.1331	{29913@[y4+1, y5+1, y7+1, y8+1, y8+1, y9+1, y11+1, y11+1, y12+1, y12+1, y14+2, y14+2];[b7+1, b8+1, b9+1, b9+1, b11+1, b11+1, b12+1, b14+1];[M16+2, M16+2]}{29915@[y2+1, y5+1, y9+1]}{29916@[y2+1]}	{29913@[y4+1:403.23034, y5+1:534.27078, y7+1:704.37718, y8+1:886.48154, y8+1:918.45469, y9+1:1031.53652, y11+1:1171.61198, y11+1:1203.59012, y12+1:1272.66127, y12+1:1304.63435, y14+2:766.89466, y14+2:782.88094];[b7+1:766.31117, b8+1:879.39587, b9+1:1061.50274, b9+1:1093.47188, b11+1:1231.60251, b11+1:1263.58350, b12+1:1394.61903, b14+1:1593.71065];[M16+2:882.93854, M16+2:898.92375]}{29915@[y2+1:2…	{29913@[y4+1:0.00038, y5+1:0.00034, y7+1:0.00120, y8+1:0.00004, y8+1:0.00111, y9+1:-0.00112, y11+1:-0.00199, y11+1:0.00408, y12+1:-0.00038, y12+1:0.00063, y14+2:0.00094, y14+2:0.00141];[b7+1:0.00018, b8+1:0.00082, b9+1:0.00216, b9+1:-0.00077, b11+1:-0.00359, b11+1:0.00532, b12+1:0.00036, b14+1:-0.00371];[M16+2:0.00053, M16+2:-0.00113]}{29915@[y2+1:-0.00073, y5+1:-0.00325, y9+1:-0.00329]}{29916@[y…	{29913@[y4+1:0.95, y5+1:0.63, y7+1:1.71, y8+1:0.05, y8+1:1.21, y9+1:-1.08, y11+1:-1.70, y11+1:3.39, y12+1:-0.30, y12+1:0.48, y14+2:0.62, y14+2:0.90];[b7+1:0.23, b8+1:0.93, b9+1:2.04, b9+1:-0.71, b11+1:-2.92, b11+1:4.21, b12+1:0.26, b14+1:-2.33];[M16+2:0.30, M16+2:-0.63]}{29915@[y2+1:-3.58, y5+1:-6.09, y9+1:-3.19]}{29916@[y2+1:-3.50]}	{29913@[y4+1:194307, y5+1:864516, y7+1:1351443, y8+1:311059, y8+1:350172, y9+1:165421, y11+1:248390, y11+1:296892, y12+1:207015, y12+1:271178, y14+2:220950, y14+2:270621];[b7+1:140872, b8+1:204289, b9+1:149416, b9+1:221584, b11+1:196718, b11+1:276559, b12+1:123941, b14+1:138306];[M16+2:3311577, M16+2:4902506]}{29915@[y2+1:3069, y5+1:9154, y9+1:2747]}{29916@[y2+1:871]}	{29913@22}{29915@3}{29916@1}		50.3537	158.003	70	2;2	4	4	3
NS1	NS1	69	94	NS1NS16994	K	K	3	W:\Collaboration_Services\Raw_files_FPL\Fusion Lumos\2021\Zheng\20211204_ZS_WP_SV_ns1_xlms\2021-12-04-10-10-24\Task1-Calibrate\20211203_ZS_WP_SV_ns1_R3-calib.mzML	29029	29013	958.089	5	4785.41	Intra	K;K		NS1	69	LENLMWKQITPELNHILSENEVK	LENLMWKQITPELNHILSENEVK(7)	2777.44	26.1742	{29029@[b3+1, b4+1, b5+1, b6+1, b8+1, b8+1, b9+1, b9+1, b10+1, b10+1];[y6+1, y7+1, y8+1, y13+2, y14+2, y15+2, y16+2, y17+2, y17+2, y18+2, y18+2, y19+2, y19+2, y21+3];[M23+2, M23+2]}{29034@}{29035@}	{29029@[b3+1:357.17640, b4+1:470.26083, b5+1:601.30174, b6+1:787.38029, b8+1:1097.54655, b8+1:1129.52206, b9+1:1210.62924, b9+1:1242.59932, b10+1:1311.66874, b10+1:1343.65007];[y6+1:705.34028, y7+1:818.42693, y8+1:931.50468, y13+2:761.39908, y14+2:811.92305, y15+2:868.46405, y16+2:932.49384, y17+2:1023.54465, y17+2:1039.53104, y18+2:1116.58531, y18+2:1132.57154, y19+2:1182.10529, y19+2:1198.09134…	{29029@[b3+1:-0.00046, b4+1:-0.00009, b5+1:0.00033, b6+1:-0.00043, b8+1:0.00173, b8+1:0.00516, b9+1:0.00035, b9+1:-0.00165, b10+1:-0.00783, b10+1:0.00142];[y6+1:-0.00108, y7+1:0.00150, y8+1:-0.00481, y13+2:0.00014, y14+2:0.00039, y15+2:-0.00167, y16+2:-0.00067, y17+2:-0.00457, y17+2:-0.00386, y18+2:-0.00257, y18+2:-0.00219, y19+2:-0.00308, y19+2:-0.00308, y21+3:0.00218];[M23+2:-0.00466, M23+2:-0.…	{29029@[b3+1:-1.28, b4+1:-0.20, b5+1:0.54, b6+1:-0.55, b8+1:1.58, b8+1:4.57, b9+1:0.29, b9+1:-1.33, b10+1:-5.97, b10+1:1.06];[y6+1:-1.53, y7+1:1.84, y8+1:-5.17, y13+2:0.10, y14+2:0.24, y15+2:-0.96, y16+2:-0.36, y17+2:-2.24, y17+2:-1.86, y18+2:-1.15, y18+2:-0.97, y19+2:-1.31, y19+2:-1.28, y21+3:0.84];[M23+2:-1.65, M23+2:-1.56]}{29034@}{29035@}	{29029@[b3+1:24780, b4+1:23788, b5+1:46088, b6+1:46910, b8+1:26703, b8+1:24236, b9+1:50536, b9+1:42936, b10+1:59023, b10+1:30788];[y6+1:20009, y7+1:62215, y8+1:22124, y13+2:228436, y14+2:466434, y15+2:158906, y16+2:183197, y17+2:112522, y17+2:71786, y18+2:167942, y18+2:114531, y19+2:96132, y19+2:80069, y21+3:31275];[M23+2:143014, M23+2:142761]}{29034@}{29035@}	{29029@26}{29034@0}{29035@0}		NS1	94	MTIMTGDIKGIMQAGKR	MTIMTGDIKGIMQAGKR(9)	1849.96	18.1197	[y5+1, y6+1, y8+1, y9+1, y9+1, y10+1, y10+1, y12+1, y12+1, y13+2, y13+1, y14+2, y14+2, y15+2];[b7+1, b8+1, b11+1];[M17+2]	[y5+1:559.33152, y6+1:690.37110, y8+1:860.47491, y9+1:1042.58129, y9+1:1074.55567, y10+1:1155.66446, y10+1:1187.63885, y12+1:1327.71380, y12+1:1359.68720, y13+2:714.88504, y13+1:1460.72678, y14+2:780.40424, y14+2:796.39082, y15+2:836.94784];[b7+1:750.31654, b8+1:863.39880, b11+1:1215.61155];[M17+2:968.97591]	[y5+1:0.00045, y6+1:-0.00046, y8+1:-0.00217, y9+1:-0.00132, y9+1:0.00099, y10+1:-0.00221, y10+1:0.00010, y12+1:-0.00127, y12+1:0.00004, y13+2:0.00005, y13+1:-0.00806, y14+2:-0.00205, y14+2:-0.00095, y15+2:0.00109];[b7+1:0.00047, b8+1:-0.00133, b11+1:0.00036];[M17+2:-0.00301]	[y5+1:0.80, y6+1:-0.66, y8+1:-2.53, y9+1:-1.27, y9+1:0.92, y10+1:-1.92, y10+1:0.08, y12+1:-0.96, y12+1:0.03, y13+2:0.04, y13+1:-5.52, y14+2:-1.31, y14+2:-0.60, y15+2:0.65];[b7+1:0.63, b8+1:-1.55, b11+1:0.29];[M17+2:-1.55]	[y5+1:25688, y6+1:76389, y8+1:129012, y9+1:64506, y9+1:40689, y10+1:77317, y10+1:31732, y12+1:43151, y12+1:18656, y13+2:37850, y13+1:21031, y14+2:53021, y14+2:49165, y15+2:62845];[b7+1:48714, b8+1:16525, b11+1:17216];[M17+2:888561]	18		44.2939	158.01	28	2;1	3	7	13
NS1	NS1	69	94	NS1NS16994	K	K	3	W:\Collaboration_Services\Raw_files_FPL\Fusion Lumos\2021\Zheng\20211204_ZS_WP_SV_ns1_xlms\2021-12-04-10-10-24\Task1-Calibrate\20211203_ZS_WP_SV_ns1_R3-calib.mzML	28148	28096	933.266	5	4661.29	Intra	K;K		NS1	69	LENLMWKQITPELNHILSENEVK	LENLMWKQITPELNHILSENEVK(7)	2777.44	22.147	{28148@[b3+1, b4+1, b5+1, b6+1, b7+1, b7+1, b8+1, b8+1, b9+1, b9+1];[y6+1, y7+1, y13+2, y14+2, y15+2, y17+2, y17+2, y18+2, y19+2, y21+3];[M23+3, M23+2]}{28153@[y13+1]}{28154@[b2+1]}	{28148@[b3+1:357.17707, b4+1:470.26119, b5+1:601.30057, b6+1:787.38031, b7+1:969.48552, b7+1:1001.45918, b8+1:1097.54190, b8+1:1129.51534, b9+1:1210.62876, b9+1:1242.60156];[y6+1:705.34296, y7+1:818.42406, y13+2:761.39872, y14+2:811.92247, y15+2:868.46345, y17+2:1023.54565, y17+2:1039.53062, y18+2:1132.57232, y19+2:1182.10599, y21+3:864.11754];[M23+3:944.82306, M23+2:1432.71506]}{28153@[y13+1:152…	{28148@[b3+1:0.00021, b4+1:0.00027, b5+1:-0.00084, b6+1:-0.00041, b7+1:-0.00073, b7+1:0.00085, b8+1:-0.00292, b8+1:-0.00157, b9+1:-0.00012, b9+1:0.00059];[y6+1:0.00160, y7+1:-0.00137, y13+2:-0.00058, y14+2:-0.00077, y15+2:-0.00287, y17+2:-0.00256, y17+2:-0.00471, y18+2:-0.00063, y19+2:-0.00169, y21+3:0.00469];[M23+3:-0.00541, M23+2:-0.00928]}{28153@[y13+1:0.01020]}{28154@[b2+1:-0.00022]}	{28148@[b3+1:0.59, b4+1:0.57, b5+1:-1.40, b6+1:-0.52, b7+1:-0.75, b7+1:0.85, b8+1:-2.67, b8+1:-1.39, b9+1:-0.10, b9+1:0.48];[y6+1:2.27, y7+1:-1.67, y13+2:-0.38, y14+2:-0.47, y15+2:-1.66, y17+2:-1.25, y17+2:-2.27, y18+2:-0.28, y19+2:-0.72, y21+3:1.81];[M23+3:-1.91, M23+2:-3.24]}{28153@[y13+1:6.71]}{28154@[b2+1:-0.92]}	{28148@[b3+1:14424, b4+1:13656, b5+1:25200, b6+1:23121, b7+1:20295, b7+1:15659, b8+1:10540, b8+1:11426, b9+1:30884, b9+1:18914];[y6+1:17092, y7+1:41594, y13+2:133120, y14+2:272216, y15+2:85631, y17+2:67979, y17+2:33058, y18+2:37637, y19+2:62920, y21+3:12013];[M23+3:79973, M23+2:24013]}{28153@[y13+1:165]}{28154@[b2+1:117]}	{28148@22}{28153@1}{28154@1}		NS1	94	MTIMTGDIKGIMQAGK	M[Common Variable:Oxidation on M]TIMTGDIKGIM[Common Variable:Oxidation on M]QAGK(9)	1725.85	16.1046	{28148@[b4+1, b7+1, b8+1, b9+1, b9+1, b11+1, b11+1];[y5+1, y7+1, y8+1, y11+1, y11+1, y12+1, y12+1];[M16+2, M16+2]}{28151@[y2+1]}{28152@[y11+1]}	{28148@[b4+1:493.21502, b7+1:766.31400, b8+1:879.39741, b9+1:1061.50047, b9+1:1093.47268, b11+1:1231.61217, b11+1:1263.58093];[y5+1:550.26515, y7+1:720.37142, y8+1:902.47718, y11+1:1187.60429, y11+1:1219.58163, y12+1:1288.65217, y12+1:1320.63171];[M16+2:890.93438, M16+2:906.91995]}{28151@[y2+1:204.13363]}{28152@[y11+1:1187.60185]}	{28148@[b4+1:0.00012, b7+1:0.00301, b8+1:0.00236, b9+1:-0.00011, b9+1:0.00002, b11+1:0.00606, b11+1:0.00275];[y5+1:-0.00021, y7+1:0.00054, y8+1:0.00077, y11+1:-0.00459, y11+1:0.00067, y12+1:-0.00439, y12+1:0.00307];[M16+2:-0.00271, M16+2:-0.00365]}{28151@[y2+1:-0.00063]}{28152@[y11+1:-0.00703]}	{28148@[b4+1:0.24, b7+1:3.93, b8+1:2.69, b9+1:-0.10, b9+1:0.02, b11+1:4.93, b11+1:2.18];[y5+1:-0.38, y7+1:0.74, y8+1:0.86, y11+1:-3.87, y11+1:0.55, y12+1:-3.41, y12+1:2.32];[M16+2:-1.52, M16+2:-2.01]}{28151@[y2+1:-3.12]}{28152@[y11+1:-5.93]}	{28148@[b4+1:10974, b7+1:14295, b8+1:15234, b9+1:13106, b9+1:21424, b11+1:11699, b11+1:10559];[y5+1:33465, y7+1:94074, y8+1:19634, y11+1:17214, y11+1:19564, y12+1:12402, y12+1:15517];[M16+2:198991, M16+2:239984]}{28151@[y2+1:99]}{28152@[y11+1:266]}	{28148@16}{28151@1}{28152@1}		38.2516	158.005	20	2;2	4	14	19
NS1	NS1	69	94	NS1NS16994	K	K	3	W:\Collaboration_Services\Raw_files_FPL\Fusion Lumos\2021\Zheng\20211204_ZS_WP_SV_ns1_xlms\2021-12-04-10-10-24\Task1-Calibrate\20211203_ZS_WP_SV_ns1_R3-calib.mzML	29254	29236	996.49	5	4977.42	Intra	K;K		NS1	69	LENLMWKQITPELNHILSENEVK	LENLMWKQITPELNHILSENEVK(7)	2777.44	21.1053	{29254@[b4+1, b5+1, b6+1, b7+1, b7+1, b8+1, b9+1, b9+1, b10+1];[y7+1, y13+2, y14+2, y15+2, y16+2, y17+2, y17+2, y18+2, y19+2, y21+3];[M23+2, M23+2]}{29259@[b2+1]}{29260@[y12+1]}	{29254@[b4+1:470.26199, b5+1:601.30122, b6+1:787.38170, b7+1:969.48439, b7+1:1001.46264, b8+1:1129.51129, b9+1:1210.62450, b9+1:1242.59322, b10+1:1311.66795];[y7+1:818.42766, y13+2:761.39836, y14+2:811.92273, y15+2:868.46349, y16+2:932.49343, y17+2:1023.54541, y17+2:1039.53268, y18+2:1116.58650, y19+2:1182.10835, y21+3:864.11395];[M23+2:1416.73241, M23+2:1432.71961]}{29259@[b2+1:243.13358]}{29260…	{29254@[b4+1:0.00106, b5+1:-0.00019, b6+1:0.00098, b7+1:-0.00186, b7+1:0.00431, b8+1:-0.00561, b9+1:-0.00439, b9+1:-0.00774, b10+1:-0.00861];[y7+1:0.00224, y13+2:-0.00131, y14+2:-0.00024, y15+2:-0.00279, y16+2:-0.00149, y17+2:-0.00305, y17+2:-0.00058, y18+2:-0.00017, y19+2:0.00303, y21+3:-0.00608];[M23+2:-0.00250, M23+2:-0.00018]}{29259@[b2+1:-0.00035]}{29260@[y12+1:-0.00320]}	{29254@[b4+1:2.27, b5+1:-0.32, b6+1:1.25, b7+1:-1.92, b7+1:4.31, b8+1:-4.97, b9+1:-3.63, b9+1:-6.24, b10+1:-6.57];[y7+1:2.73, y13+2:-0.86, y14+2:-0.15, y15+2:-1.61, y16+2:-0.80, y17+2:-1.49, y17+2:-0.28, y18+2:-0.08, y19+2:1.28, y21+3:-2.35];[M23+2:-0.88, M23+2:-0.06]}{29259@[b2+1:-1.47]}{29260@[y12+1:-2.24]}	{29254@[b4+1:46954, b5+1:111154, b6+1:79194, b7+1:50913, b7+1:51529, b8+1:36239, b9+1:108757, b9+1:80880, b10+1:127760];[y7+1:94527, y13+2:332438, y14+2:599456, y15+2:222596, y16+2:270373, y17+2:146469, y17+2:56671, y18+2:258265, y19+2:206467, y21+3:93494];[M23+2:82113, M23+2:105441]}{29259@[b2+1:1095]}{29260@[y12+1:306]}	{29254@21}{29259@1}{29260@1}		NS1	94	MTIMTGDIKGIMQAGKR	MTIMTGDIKGIM[Common Variable:Oxidation on M]QAGK[DSSO:DSSO_hydro_K on K]R(9)	2041.97	8.02827	[y6+1, y8+1];[b8+1, b9+1, b9+1, b11+1];[M17+2, M17+2]	[y6+1:882.38109, y8+1:1052.48326];[b8+1:863.40042, b9+1:1045.50547, b9+1:1077.48341, b11+1:1247.58783];[M17+2:1048.99557, M17+2:1064.98207]	[y6+1:0.00032, y8+1:-0.00304];[b8+1:0.00028, b9+1:-0.00019, b9+1:0.00567, b11+1:0.00456];[M17+2:-0.00081, M17+2:0.00010]	[y6+1:0.37, y8+1:-2.89];[b8+1:0.33, b9+1:-0.18, b9+1:5.26, b11+1:3.66];[M17+2:-0.39, M17+2:0.05]	[y6+1:52851, y8+1:79973];[b8+1:68234, b9+1:77444, b9+1:35133, b11+1:80843];[M17+2:153613, M17+2:300899]	8		29.1335	158.006	26	2;2	4	2	6
NS1	NS1	69	94	NS1NS16994	K	K	3	W:\Collaboration_Services\Raw_files_FPL\Fusion Lumos\2021\Zheng\20211204_ZS_WP_SV_ns1_xlms\2021-12-04-10-10-24\Task1-Calibrate\20211203_ZS_WP_SV_ns1_R3-calib.mzML	29442	29439	996.889	5	4979.41	Intra	K;K		NS1	94	MTIMTGDIKGIMQAGKR	MT[DSSO:DSSO_alkene_T on T]IMTGDIKGIMQAGK[DSSO:DSSO_alkene_K on K]R(9)	1957.98	10.0295	[y3+1, y4+1, y5+1, y6+1, y8+1, y9+1, y9+1, y10+1, y12+1, y13+1]	[y3+1:414.24502, y4+1:485.28337, y5+1:613.34236, y6+1:744.38100, y8+1:914.48713, y9+1:1096.59637, y9+1:1128.55794, y10+1:1241.65385, y12+1:1413.68913, y13+1:1514.73766]	[y3+1:-0.00096, y4+1:0.00028, y5+1:0.00069, y6+1:-0.00116, y8+1:-0.00055, y9+1:0.00316, y9+1:-0.00735, y10+1:0.00450, y12+1:-0.00863, y13+1:-0.00778]	[y3+1:-2.33, y4+1:0.57, y5+1:1.13, y6+1:-1.56, y8+1:-0.60, y9+1:2.89, y9+1:-6.52, y10+1:3.62, y12+1:-6.11, y13+1:-5.14]	[y3+1:32971, y4+1:52549, y5+1:58104, y6+1:187800, y8+1:152740, y9+1:47742, y9+1:72457, y10+1:30548, y12+1:49351, y13+1:38715]	10		NS1	69	LENLMWKQITPELNHILSENEVK	LENLMWKQIT[DSSO:DSSO_thiol_T on T]PELNHILSENEVK(7)	2863.42	3.01807	[b7+1];[y7+1, y13+2]	[b7+1:969.48910];[y7+1:818.42686, y13+2:761.39952]	[b7+1:0.00285];[y7+1:0.00143, y13+2:0.00102]	[b7+1:2.95];[y7+1:1.75, y13+2:0.67]	[b7+1:55360];[y7+1:79505, y13+2:307825]	3		13.0476	158.004	10	0;0	0	-	-
NS1	NS1	69	94	NS1NS16994	K	K	3	W:\Collaboration_Services\Raw_files_FPL\Fusion Lumos\2021\Zheng\20211204_ZS_WP_SV_ns1_xlms\2021-12-04-10-10-24\Task1-Calibrate\20211203_ZS_WP_SV_ns1_R3-calib.mzML	30115	30104	926.87	5	4629.31	Intra	K;K		NS1	69	LENLMWKQITPELNHILSENEVK	LENLMWKQITPELNHILSENEVK(7)	2777.44	7.11425	[b5+1, b6+1];[y7+1, y13+1, y14+2, y15+2, y16+2]	[b5+1:601.30417, b6+1:787.38285];[y7+1:818.42787, y13+1:1521.79137, y14+2:811.92559, y15+2:868.46695, y16+2:932.49676]	[b5+1:0.00276, b6+1:0.00212];[y7+1:0.00244, y13+1:0.00062, y14+2:0.00548, y15+2:0.00414, y16+2:0.00518]	[b5+1:4.60, b6+1:2.70];[y7+1:2.99, y13+1:0.41, y14+2:3.38, y15+2:2.39, y16+2:2.78]	[b5+1:29043, b6+1:30029];[y7+1:86386, y13+1:11101, y14+2:621091, y15+2:158838, y16+2:48800]	7		NS1	94	MTIMTGDIKGIMQAGK	MTIMTGDIKGIMQAGK(9)	1693.86	5.0379	[y5+1, y7+1, y8+1, y8+1, y9+1]	[y5+1:534.27280, y7+1:704.37736, y8+1:886.48137, y8+1:918.45875, y9+1:999.56775]	[y5+1:0.00235, y7+1:0.00138, y8+1:-0.00013, y8+1:0.00518, y9+1:0.00219]	[y5+1:4.42, y7+1:1.97, y8+1:-0.14, y8+1:5.64, y9+1:2.19]	[y5+1:47212, y7+1:174376, y8+1:62853, y8+1:28211, y9+1:14197]	5		12.1521	158.014	3	0;0	0	-	-
NS1	NS1	9	214	NS1NS19214	K	K	1	W:\Collaboration_Services\Raw_files_FPL\Fusion Lumos\2021\Zheng\20211204_ZS_WP_SV_ns1_xlms\2021-12-04-10-10-24\Task1-Calibrate\20211203_ZS_WP_SV_ns1_R1-calib.mzML	19942	19882	867.432	3	2599.27	Intra	K;K		NS1	214	IEKASFIEVK	IEKASFIEVK(3)	1162.66	18.1683	{19942@[b3+1, b3+1, b4+1, b4+1, b5+1, b8+1, b9+1, b9+1];[y3+1, y5+1, y6+1, y7+1, y8+1, y8+1, y9+1, y9+1];[M10+1, M10+1]}{19944@[b2+1];[y9+1]}{19945@}{19946@[b2+1]}	{19942@[b3+1:425.23900, b3+1:457.21159, b4+1:496.27676, b4+1:528.24785, b5+1:583.30955, b8+1:972.50098, b9+1:1071.56821, b9+1:1103.54269];[y3+1:375.22333, y5+1:635.37504, y6+1:722.40756, y7+1:793.44533, y8+1:975.54980, y8+1:1007.52196, y9+1:1104.58554, y9+1:1136.56087];[M10+1:1217.67687, M10+1:1249.64892]}{19944@[b2+1:243.13328];[y9+1:1104.59834]}{19945@}{19946@[b2+1:243.13326]}	{19942@[b3+1:-0.00046, b3+1:0.00005, b4+1:0.00019, b4+1:-0.00080, b5+1:0.00095, b8+1:-0.00269, b9+1:-0.00387, b9+1:-0.00147];[y3+1:-0.00049, y5+1:-0.00125, y6+1:-0.00075, y7+1:-0.00010, y8+1:-0.00116, y8+1:-0.00108, y9+1:-0.00801, y9+1:-0.00475];[M10+1:-0.00074, M10+1:-0.00078]}{19944@[b2+1:-0.00066];[y9+1:0.00479]}{19945@}{19946@[b2+1:-0.00067]}	{19942@[b3+1:-1.08, b3+1:0.11, b4+1:0.39, b4+1:-1.51, b5+1:1.63, b8+1:-2.77, b9+1:-3.61, b9+1:-1.33];[y3+1:-1.30, y5+1:-1.97, y6+1:-1.05, y7+1:-0.13, y8+1:-1.19, y8+1:-1.07, y9+1:-7.26, y9+1:-4.19];[M10+1:-0.61, M10+1:-0.62]}{19944@[b2+1:-2.71];[y9+1:4.34]}{19945@}{19946@[b2+1:-2.76]}	{19942@[b3+1:24469, b3+1:29685, b4+1:8861, b4+1:11272, b5+1:4839, b8+1:8089, b9+1:8985, b9+1:8521];[y3+1:16989, y5+1:18650, y6+1:96111, y7+1:174034, y8+1:97146, y8+1:63766, y9+1:14986, y9+1:7788];[M10+1:116043, M10+1:99099]}{19944@[b2+1:596];[y9+1:227]}{19945@}{19946@[b2+1:211]}	{19942@18}{19944@2}{19945@0}{19946@1}		NS1	9	DSGCVVSWKNK	DSGC[Common Fixed:Carbamidomethyl on C]VVSWKNK(9)	1278.6	13.2106	{19942@[y4+1, y4+1, y5+1, y5+1, y6+1, y6+1, y7+1];[b5+1, b6+1, b7+1, b8+1];[M11+1, M11+1]}{19947@}	{19942@[y4+1:629.34249, y4+1:661.31343, y5+1:716.37189, y5+1:748.34460, y6+1:815.44034, y6+1:847.41625, y7+1:914.50978];[b5+1:519.18737, b6+1:618.25436, b7+1:705.28864, b8+1:891.36104];[M11+1:1333.61983, M11+1:1365.59129]}{19947@}	{19942@[y4+1:0.00193, y4+1:0.00079, y5+1:-0.00071, y5+1:-0.00008, y6+1:-0.00067, y6+1:0.00316, y7+1:0.00036];[b5+1:0.00060, b6+1:-0.00083, b7+1:0.00143, b8+1:-0.00548];[M11+1:-0.00068, M11+1:-0.00130]}{19947@}	{19942@[y4+1:3.07, y4+1:1.19, y5+1:-0.99, y5+1:-0.10, y6+1:-0.83, y6+1:3.73, y7+1:0.39];[b5+1:1.15, b6+1:-1.34, b7+1:2.02, b8+1:-6.16];[M11+1:-0.51, M11+1:-0.95]}{19947@}	{19942@[y4+1:8993, y4+1:8779, y5+1:48624, y5+1:29928, y6+1:33815, y6+1:28325, y7+1:13071];[b5+1:12679, b6+1:33910, b7+1:9874, b8+1:5308];[M11+1:395350, M11+1:384099]}{19947@}	{19942@13}{19947@0}		31.379	158.012	19	2;2	4	51	5
NS1	NS1	9	214	NS1NS19214	K	K	1	W:\Collaboration_Services\Raw_files_FPL\Fusion Lumos\2021\Zheng\20211204_ZS_WP_SV_ns1_xlms\2021-12-04-10-10-24\Task1-Calibrate\20211203_ZS_WP_SV_ns1_R1-calib.mzML	19972	19927	650.825	4	2599.27	Intra	K;K		NS1	9	DSGCVVSWKNK	DSGC[Common Fixed:Carbamidomethyl on C]VVSWKNK(9)	1278.6	15.1104	{19972@[b2+1, b4+1, b5+1, b6+1, b9+1];[y2+1, y4+1, y5+1, y5+1, y6+1, y6+1, y7+1, y9+1];[M11+2, M11+2]}{19977@[b2+1];[y9+1]}{19978@}	{19972@[b2+1:203.06591, b4+1:420.11869, b5+1:519.18626, b6+1:618.25530, b9+1:1105.44257];[y2+1:261.15572, y4+1:661.31293, y5+1:716.37279, y5+1:748.34251, y6+1:815.44704, y6+1:847.41133, y7+1:946.48113, y9+1:1131.56305];[M11+2:667.31217, M11+2:683.29850]}{19977@[b2+1:203.06661];[y9+1:1163.53152]}{19978@}	{19972@[b2+1:-0.00034, b4+1:0.00033, b5+1:-0.00051, b6+1:0.00012, b9+1:-0.00156];[y2+1:-0.00001, y4+1:0.00028, y5+1:0.00019, y5+1:-0.00217, y6+1:0.00603, y6+1:-0.00176, y7+1:-0.00038, y9+1:0.00151];[M11+2:-0.00344, M11+2:-0.00287]}{19977@[b2+1:0.00036];[y9+1:-0.00210]}{19978@}	{19972@[b2+1:-1.68, b4+1:0.79, b5+1:-0.99, b6+1:0.19, b9+1:-1.41];[y2+1:-0.04, y4+1:0.43, y5+1:0.27, y5+1:-2.90, y6+1:7.41, y6+1:-2.08, y7+1:-0.40, y9+1:1.34];[M11+2:-2.58, M11+2:-2.10]}{19977@[b2+1:1.78];[y9+1:-1.81]}{19978@}	{19972@[b2+1:12618, b4+1:22374, b5+1:56442, b6+1:88552, b9+1:21268];[y2+1:23127, y4+1:27743, y5+1:46490, y5+1:112086, y6+1:21847, y6+1:93364, y7+1:38902, y9+1:23830];[M11+2:78174, M11+2:206927]}{19977@[b2+1:237];[y9+1:118]}{19978@}	{19972@15}{19977@2}{19978@0}		NS1	214	IEKASFIEVK	IEKASFIEVK(3)	1162.66	7.18842	{19972@[b3+1, b3+1];[y5+1, y6+1, y7+1];[M10+2, M10+2]}{19975@[b2+1]}{19976@[b2+1]}	{19972@[b3+1:425.23817, b3+1:457.21271];[y5+1:635.37812, y6+1:722.40782, y7+1:793.44486];[M10+2:609.34172, M10+2:625.32756]}{19975@[b2+1:243.13327]}{19976@[b2+1:243.13326]}	{19972@[b3+1:-0.00129, b3+1:0.00117];[y5+1:0.00183, y6+1:-0.00049, y7+1:-0.00058];[M10+2:-0.00144, M10+2:-0.00186]}{19975@[b2+1:-0.00066]}{19976@[b2+1:-0.00067]}	{19972@[b3+1:-3.04, b3+1:2.56];[y5+1:2.89, y6+1:-0.68, y7+1:-0.73];[M10+2:-1.18, M10+2:-1.49]}{19975@[b2+1:-2.72]}{19976@[b2+1:-2.78]}	{19972@[b3+1:17923, b3+1:18463];[y5+1:19405, y6+1:38826, y7+1:56333];[M10+2:1027058, M10+2:312615]}{19975@[b2+1:632]}{19976@[b2+1:261]}	{19972@7}{19975@1}{19976@1}		22.2989	158.009	13	2;2	4	4	8
NS1	NS1	9	214	NS1NS19214	K	K	3	W:\Collaboration_Services\Raw_files_FPL\Fusion Lumos\2021\Zheng\20211204_ZS_WP_SV_ns1_xlms\2021-12-04-10-10-24\Task1-Calibrate\20211203_ZS_WP_SV_ns1_R3-calib.mzML	19385	19357	650.824	4	2599.27	Intra	K;K		NS1	9	DSGCVVSWKNK	DSGC[Common Fixed:Carbamidomethyl on C]VVSWKNK(9)	1278.6	20.1421	{19385@[b2+1, b4+1, b5+1, b6+1, b7+1, b9+1];[y2+1, y3+1, y3+1, y4+1, y5+1, y5+1, y6+1, y6+1, y7+1, y7+1, y9+1, y9+1];[M11+2, M11+2]}{19389@[b2+1]}{19390@[b2+1]}	{19385@[b2+1:203.06535, b4+1:420.11768, b5+1:519.18691, b6+1:618.25559, b7+1:705.28751, b9+1:1105.44637];[y2+1:261.15553, y3+1:443.26046, y3+1:475.23479, y4+1:661.31293, y5+1:716.37275, y5+1:748.34409, y6+1:815.44047, y6+1:847.41382, y7+1:914.50928, y7+1:946.48080, y9+1:1131.55749, y9+1:1163.53162];[M11+2:667.31360, M11+2:683.29945]}{19389@[b2+1:203.06680]}{19390@[b2+1:203.06681]}	{19385@[b2+1:-0.00090, b4+1:-0.00068, b5+1:0.00013, b6+1:0.00040, b7+1:0.00029, b9+1:0.00224];[y2+1:-0.00020, y3+1:-0.00080, y3+1:0.00145, y4+1:0.00028, y5+1:0.00015, y5+1:-0.00059, y6+1:-0.00054, y6+1:0.00073, y7+1:-0.00014, y7+1:-0.00070, y9+1:-0.00404, y9+1:-0.00200];[M11+2:-0.00058, M11+2:-0.00095]}{19389@[b2+1:0.00056]}{19390@[b2+1:0.00056]}	{19385@[b2+1:-4.44, b4+1:-1.62, b5+1:0.26, b6+1:0.66, b7+1:0.41, b9+1:2.03];[y2+1:-0.79, y3+1:-1.80, y3+1:3.06, y4+1:0.42, y5+1:0.22, y5+1:-0.79, y6+1:-0.66, y6+1:0.87, y7+1:-0.16, y7+1:-0.74, y9+1:-3.57, y9+1:-1.72];[M11+2:-0.43, M11+2:-0.70]}{19389@[b2+1:2.76]}{19390@[b2+1:2.79]}	{19385@[b2+1:10002, b4+1:25040, b5+1:65311, b6+1:95195, b7+1:20571, b9+1:26608];[y2+1:11848, y3+1:12552, y3+1:9520, y4+1:19716, y5+1:45873, y5+1:133715, y6+1:28885, y6+1:88221, y7+1:19864, y7+1:37813, y9+1:17995, y9+1:26310];[M11+2:81598, M11+2:163674]}{19389@[b2+1:60]}{19390@[b2+1:67]}	{19385@20}{19389@1}{19390@1}		NS1	214	IEKASFIEVK	IEKASFIEVK(3)	1162.66	12.2154	{19385@[b2+1, b3+1, b3+1, b4+1];[y2+1, y5+1, y6+1, y7+1, y8+1, y8+1];[M10+2, M10+2]}{19387@[b2+1];[y9+1]}{19388@[b2+1]}	{19385@[b2+1:243.13430, b3+1:425.23856, b3+1:457.21115, b4+1:528.24752];[y2+1:246.18072, y5+1:635.38060, y6+1:722.40959, y7+1:793.44398, y8+1:975.54869, y8+1:1007.52406];[M10+2:609.34260, M10+2:625.32816]}{19387@[b2+1:243.13352];[y9+1:1104.59942]}{19388@[b2+1:243.13350]}	{19385@[b2+1:0.00037, b3+1:-0.00089, b3+1:-0.00038, b4+1:-0.00113];[y2+1:-0.00049, y5+1:0.00431, y6+1:0.00127, y7+1:-0.00145, y8+1:-0.00226, y8+1:0.00102];[M10+2:0.00031, M10+2:-0.00065]}{19387@[b2+1:-0.00042];[y9+1:0.00587]}{19388@[b2+1:-0.00043]}	{19385@[b2+1:1.53, b3+1:-2.10, b3+1:-0.84, b4+1:-2.14];[y2+1:-2.02, y5+1:6.79, y6+1:1.76, y7+1:-1.83, y8+1:-2.32, y8+1:1.02];[M10+2:0.26, M10+2:-0.52]}{19387@[b2+1:-1.72];[y9+1:5.32]}{19388@[b2+1:-1.79]}	{19385@[b2+1:21624, b3+1:17723, b3+1:17824, b4+1:9696];[y2+1:10999, y5+1:11271, y6+1:36147, y7+1:50846, y8+1:28905, y8+1:12018];[M10+2:948236, M10+2:260067]}{19387@[b2+1:854];[y9+1:444]}{19388@[b2+1:360]}	{19385@12}{19387@2}{19388@1}		32.3576	158.006	30	2;2	4	18	1
ApoA1	ApoA1	119	130	ApoA1ApoA1119130	K	K	3	W:\Collaboration_Services\Raw_files_FPL\Fusion Lumos\2021\Zheng\20211204_ZS_WP_SV_ns1_xlms\2021-12-04-10-10-24\Task1-Calibrate\20211203_ZS_WP_SV_ns1_R3-calib.mzML	17043	16997	767.875	4	3067.47	Intra	K;K		ApoA1	119	QKVQPYLDEFQK	QKVQPYLDEFQK(2)	1521.78	11.1486	{17043@[b3+1, b3+1, b4+1];[y4+1, y5+1, y6+1, y8+1, y9+1, y10+1];[M12+2, M12+2]}{17047@}{17048@}	{17043@[b3+1:410.24022, b3+1:442.21182, b4+1:570.27150];[y4+1:551.28367, y5+1:666.31213, y6+1:779.39431, y8+1:1039.50957, y9+1:1167.56651, y10+1:1266.63815];[M12+2:788.90542, M12+2:804.89033]}{17047@}{17048@}	{17043@[b3+1:0.00043, b3+1:-0.00005, b4+1:0.00105];[y4+1:0.00129, y5+1:0.00279, y6+1:0.00092, y8+1:0.00008, y9+1:-0.00156, y10+1:0.00168];[M12+2:0.00299, M12+2:0.00072]}{17047@}{17048@}	{17043@[b3+1:1.04, b3+1:-0.11, b4+1:1.84];[y4+1:2.34, y5+1:4.20, y6+1:1.18, y8+1:0.07, y9+1:-1.33, y10+1:1.32];[M12+2:1.90, M12+2:0.45]}{17047@}{17048@}	{17043@[b3+1:12335, b3+1:8894, b4+1:11354];[y4+1:21219, y5+1:30900, y6+1:20346, y8+1:237801, y9+1:45115, y10+1:32478];[M12+2:206732, M12+2:118467]}{17047@}{17048@}	{17043@11}{17047@0}{17048@0}		ApoA1	130	KWHEEVEIYR	KWHEEVEIYR(1)	1387.69	5.13286	{17043@[y6+1, y7+1, y8+2];[M10+1, M10+2]}{17045@[y3+1, y7+1]}{17046@[y3+1, y7+1];[b5+1]}	{17043@[y6+1:808.41737, y7+1:937.46267, y8+2:537.76466];[M10+1:1442.70544, M10+2:737.84353]}{17045@[y3+1:451.26733, y7+1:937.46661]}{17046@[y3+1:451.26737, y7+1:937.46670];[b5+1:764.33452]}	{17043@[y6+1:-0.00258, y7+1:0.00013, y8+2:0.00059];[M10+1:-0.00085, M10+2:0.00141]}{17045@[y3+1:0.00099, y7+1:0.00407]}{17046@[y3+1:0.00102, y7+1:0.00416];[b5+1:-0.00169]}	{17043@[y6+1:-3.19, y7+1:0.14, y8+2:0.55];[M10+1:-0.59, M10+2:0.96]}{17045@[y3+1:2.19, y7+1:4.34]}{17046@[y3+1:2.27, y7+1:4.44];[b5+1:-2.21]}	{17043@[y6+1:6227, y7+1:12735, y8+2:25279];[M10+1:8981, M10+2:613560]}{17045@[y3+1:274, y7+1:1040]}{17046@[y3+1:174, y7+1:598];[b5+1:186]}	{17043@5}{17045@2}{17046@3}		16.2814	158.001	32	2;2	4	3	1
ApoA1	ApoA1	119	156	ApoA1ApoA1119156	K	K	1	W:\Collaboration_Services\Raw_files_FPL\Fusion Lumos\2021\Zheng\20211204_ZS_WP_SV_ns1_xlms\2021-12-04-10-10-24\Task1-Calibrate\20211203_ZS_WP_SV_ns1_R1-calib.mzML	14714	14689	699.604	4	2794.39	Intra	K;K		ApoA1	119	QKVQPYLDEFQK	QKVQPYLDEFQK(2)	1521.78	15.1466	{14714@[b2+1, b3+1, b3+1, b4+1, b4+1];[y3+1, y4+1, y5+1, y6+1, y7+1, y8+1, y9+1, y10+1];[M12+2, M12+2]}{14718@}{14719@}	{14714@[b2+1:343.14225, b3+1:410.23864, b3+1:442.21122, b4+1:538.29511, b4+1:570.26957];[y3+1:422.23876, y4+1:551.28539, y5+1:666.30771, y6+1:779.39168, y7+1:942.45505, y8+1:1039.50887, y9+1:1167.56844, y10+1:1266.63876];[M12+2:788.90331, M12+2:804.88916]}{14718@}{14719@}	{14714@[b2+1:-0.00120, b3+1:-0.00115, b3+1:-0.00065, b4+1:-0.00326, b4+1:-0.00088];[y3+1:-0.00104, y4+1:0.00300, y5+1:-0.00162, y6+1:-0.00171, y7+1:-0.00167, y8+1:-0.00062, y9+1:0.00037, y10+1:0.00228];[M12+2:-0.00123, M12+2:-0.00161]}{14718@}{14719@}	{14714@[b2+1:-3.52, b3+1:-2.80, b3+1:-1.48, b4+1:-6.07, b4+1:-1.54];[y3+1:-2.46, y4+1:5.46, y5+1:-2.43, y6+1:-2.20, y7+1:-1.78, y8+1:-0.60, y9+1:0.32, y10+1:1.80];[M12+2:-0.78, M12+2:-1.00]}{14718@}{14719@}	{14714@[b2+1:7499, b3+1:8260, b3+1:11369, b4+1:5164, b4+1:11045];[y3+1:4627, y4+1:5197, y5+1:18039, y6+1:26452, y7+1:9531, y8+1:176998, y9+1:14889, y10+1:9208];[M12+2:62453, M12+2:137538]}{14718@}{14719@}	{14714@15}{14718@0}{14719@0}		ApoA1	156	QKVQELQDK	QKVQELQDK(2)	1114.6	8.09486	{14714@[y2+1, y3+1, y4+1, y5+1, y6+1, y7+1];[M9+2, M9+1]}{14716@[y3+1]}{14717@[y8+1]}	{14714@[y2+1:262.13975, y3+1:390.19780, y4+1:503.28216, y5+1:632.32323, y6+1:760.38282, y7+1:859.45290];[M9+2:585.31120, M9+1:1201.58756]}{14716@[y3+1:390.19975]}{14717@[y8+1:1073.53264]}	{14714@[y2+1:-0.00000, y3+1:-0.00052, y4+1:-0.00023, y5+1:-0.00176, y6+1:-0.00074, y7+1:0.00093];[M9+2:-0.00096, M9+1:-0.00059]}{14716@[y3+1:0.00142]}{14717@[y8+1:0.00306]}	{14714@[y2+1:-0.01, y3+1:-1.34, y4+1:-0.46, y5+1:-2.78, y6+1:-0.98, y7+1:1.08];[M9+2:-0.82, M9+1:-0.49]}{14716@[y3+1:3.65]}{14717@[y8+1:2.86]}	{14714@[y2+1:4539, y3+1:7794, y4+1:12028, y5+1:17010, y6+1:27139, y7+1:24011];[M9+2:226723, M9+1:9658]}{14716@[y3+1:121]}{14717@[y8+1:150]}	{14714@8}{14716@1}{14717@1}		23.2414	158.006	21	2;2	4	4	82
ApoA1	ApoA1	141	205	ApoA1ApoA1141205	K	K	2	W:\Collaboration_Services\Raw_files_FPL\Fusion Lumos\2021\Zheng\20211204_ZS_WP_SV_ns1_xlms\2021-12-04-10-10-24\Task1-Calibrate\20211203_ZS_WP_SV_ns1_R2-calib.mzML	17003	16953	641.526	5	3202.6	Intra	K;K		ApoA1	141	QKVAPLGEEFR	QKVAPLGEEFR(2)	1272.68	10.1138	{17003@[y2+1, y3+1, y4+1, y5+1, y7+2, y8+1];[b4+1, b4+1];[M11+2, M11+2]}{17007@}{17008@}	{17003@[y2+1:322.18765, y3+1:451.23052, y4+1:580.27237, y5+1:637.29473, y7+2:424.21962, y8+1:918.46850];[b4+1:481.27899, b4+1:513.24995];[M11+2:664.35408, M11+2:680.34067]}{17007@}{17008@}	{17003@[y2+1:0.00029, y3+1:0.00056, y4+1:-0.00018, y5+1:0.00071, y7+2:0.00111, y8+1:0.00054];[b4+1:0.00208, b4+1:0.00096];[M11+2:0.00041, M11+2:0.00151]}{17007@}{17008@}	{17003@[y2+1:0.89, y3+1:1.24, y4+1:-0.31, y5+1:1.12, y7+2:1.32, y8+1:0.59];[b4+1:4.34, b4+1:1.88];[M11+2:0.31, M11+2:1.11]}{17007@}{17008@}	{17003@[y2+1:8641, y3+1:16201, y4+1:6040, y5+1:20700, y7+2:22258, y8+1:10985];[b4+1:4524, b4+1:9895];[M11+2:24598, M11+2:56470]}{17007@}{17008@}	{17003@10}{17007@0}{17008@0}		ApoA1	205	LEALKEGGGSLAEYHAK	LEALKEGGGSLAEYHAK(5)	1771.91	5.11391	{17003@[y6+1, y11+2];[b11+1];[M17+3, M17+2]}{17005@[y11+1]}{17006@[b2+1]}	{17003@[y6+1:718.35288, y11+2:545.27070];[b11+1:1109.58973];[M17+3:609.64791, M17+2:929.95344]}{17005@[y11+1:1089.53341]}{17006@[b2+1:243.13365]}	{17003@[y6+1:0.00101, y11+2:0.00177];[b11+1:0.00602];[M17+3:0.00088, M17+2:-0.00077]}{17005@[y11+1:0.00107]}{17006@[b2+1:-0.00028]}	{17003@[y6+1:1.41, y11+2:1.63];[b11+1:5.43];[M17+3:0.48, M17+2:-0.42]}{17005@[y11+1:0.98]}{17006@[b2+1:-1.15]}	{17003@[y6+1:5292, y11+2:16479];[b11+1:4251];[M17+3:135293, M17+2:19194]}{17005@[y11+1:112]}{17006@[b2+1:13]}	{17003@5}{17005@1}{17006@1}		15.2277	158.003	28	2;2	4	4	1
ApoA1	ApoA1	141	219	ApoA1ApoA1141219	K	S	3	W:\Collaboration_Services\Raw_files_FPL\Fusion Lumos\2021\Zheng\20211204_ZS_WP_SV_ns1_xlms\2021-12-04-10-10-24\Task1-Calibrate\20211203_ZS_WP_SV_ns1_R3-calib.mzML	15893	15863	651.838	4	2603.32	Intra	K;S		ApoA1	141	QKVAPLGEEFR	QKVAPLGEEFR(2)	1272.68	7.09936	{15893@[y2+1, y5+1, y7+1, y8+1];[M11+2, M11+2];[b4+1]}{15901@[y8+1]}{15902@}	{15893@[y2+1:322.18667, y5+1:637.29253, y7+1:847.43049, y8+1:918.46219];[M11+2:664.35390, M11+2:680.33834];[b4+1:513.24819]}{15901@[y8+1:918.46684]}{15902@}	{15893@[y2+1:-0.00069, y5+1:-0.00149, y7+1:-0.00035, y8+1:-0.00577];[M11+2:0.00005, M11+2:-0.00315];[b4+1:-0.00080]}{15901@[y8+1:-0.00111]}{15902@}	{15893@[y2+1:-2.16, y5+1:-2.33, y7+1:-0.42, y8+1:-6.29];[M11+2:0.04, M11+2:-2.32];[b4+1:-1.56]}{15901@[y8+1:-1.21]}{15902@}	{15893@[y2+1:4778, y5+1:18871, y7+1:59678, y8+1:10214];[M11+2:20687, M11+2:43316];[b4+1:5381]}{15901@[y8+1:53]}{15902@}	{15893@7}{15901@1}{15902@0}		ApoA1	219	ASEQLKALGEK	ASEQLKALGEK(2)	1172.64	4.06396	{15893@[y3+1, y5+1];[b7+1];[M11+2]}{15899@}	{15893@[y3+1:333.17645, y5+1:517.29647];[b7+1:782.39911];[M11+2:614.33159]}{15899@}	{15893@[y3+1:-0.00041, y5+1:-0.00157];[b7+1:-0.00518];[M11+2:-0.00204]}{15899@}	{15893@[y3+1:-1.23, y5+1:-3.05];[b7+1:-6.63];[M11+2:-1.66]}{15899@}	{15893@[y3+1:8795, y5+1:10296];[b7+1:9175];[M11+2:76621]}{15899@}	{15893@4}{15899@0}		11.1633	158.002	18	2;1	3	10	4
ApoA1	ApoA1	141	223	ApoA1ApoA1141223	K	K	1	W:\Collaboration_Services\Raw_files_FPL\Fusion Lumos\2021\Zheng\20211204_ZS_WP_SV_ns1_xlms\2021-12-04-10-10-24\Task1-Calibrate\20211203_ZS_WP_SV_ns1_R1-calib.mzML	16580	16542	651.839	4	2603.33	Intra	K;K		ApoA1	141	QKVAPLGEEFR	QKVAPLGEEFR(2)	1272.68	11.0715	{16580@[y2+1, y3+1, y4+1, y5+1, y6+1, y7+2, y8+2, y9+1];[M11+2, M11+2];[b4+1]}{16584@[y9+1]}{16585@[y9+1]}	{16580@[y2+1:322.18788, y3+1:451.23027, y4+1:580.27486, y5+1:637.29479, y6+1:750.37775, y7+2:424.21932, y8+2:459.73770, y9+1:1017.53735];[M11+2:664.35478, M11+2:680.34029];[b4+1:513.24934]}{16584@[y9+1:1017.53275]}{16585@[y9+1:1017.53427]}	{16580@[y2+1:0.00051, y3+1:0.00031, y4+1:0.00231, y5+1:0.00077, y6+1:-0.00033, y7+2:0.00053, y8+2:0.00017, y9+1:0.00098];[M11+2:0.00180, M11+2:0.00075];[b4+1:0.00036]}{16584@[y9+1:-0.00362]}{16585@[y9+1:-0.00210]}	{16580@[y2+1:1.59, y3+1:0.69, y4+1:3.98, y5+1:1.21, y6+1:-0.44, y7+2:0.62, y8+2:0.18, y9+1:0.96];[M11+2:1.36, M11+2:0.55];[b4+1:0.70]}{16584@[y9+1:-3.56]}{16585@[y9+1:-2.07]}	{16580@[y2+1:12263, y3+1:17728, y4+1:9664, y5+1:90515, y6+1:11039, y7+2:58950, y8+2:26820, y9+1:51061];[M11+2:55272, M11+2:113317];[b4+1:11782]}{16584@[y9+1:122]}{16585@[y9+1:133]}	{16580@11}{16584@1}{16585@1}		ApoA1	223	ASEQLKALGEK	ASEQLKALGEK(6)	1172.64	11.0649	{16580@[y3+1, y4+1, y5+1, y6+1, y7+1, y10+1];[b5+1, b6+1, b8+1];[M11+2, M11+2]}{16582@}{16583@}	{16580@[y3+1:333.17736, y4+1:446.26078, y5+1:517.29829, y6+1:699.40376, y7+1:812.49274, y10+1:1156.62601];[b5+1:529.26437, b6+1:743.33776, b8+1:895.48513];[M11+2:614.33265, M11+2:630.31916]}{16582@}{16583@}	{16580@[y3+1:0.00050, y4+1:-0.00014, y5+1:0.00025, y6+1:0.00020, y7+1:0.00511, y10+1:0.00519];[b5+1:0.00272, b6+1:-0.00149, b8+1:-0.00322];[M11+2:0.00008, M11+2:0.00102]}{16582@}{16583@}	{16580@[y3+1:1.50, y4+1:-0.32, y5+1:0.48, y6+1:0.29, y7+1:6.30, y10+1:4.49];[b5+1:5.15, b6+1:-2.01, b8+1:-3.60];[M11+2:0.06, M11+2:0.81]}{16582@}{16583@}	{16580@[y3+1:26615, y4+1:9306, y5+1:31401, y6+1:6642, y7+1:5721, y10+1:6145];[b5+1:10223, b6+1:6685, b8+1:8558];[M11+2:242500, M11+2:62745]}{16582@}{16583@}	{16580@11}{16582@0}{16583@0}		22.1364	158.005	4	2;2	4	6	3
ApoA1	ApoA1	141	228	ApoA1ApoA1141228	K	K	3	W:\Collaboration_Services\Raw_files_FPL\Fusion Lumos\2021\Zheng\20211204_ZS_WP_SV_ns1_xlms\2021-12-04-10-10-24\Task1-Calibrate\20211203_ZS_WP_SV_ns1_R3-calib.mzML	18267	18244	743.152	4	2968.58	Intra	K;K		ApoA1	141	QKVAPLGEEFR	QKVAPLGEEFR(2)	1272.68	7.15407	{18267@[y3+1, y5+1, y7+1, y8+1, y9+1];[M11+2, M11+2]}{18271@[y8+1, y9+1]}{18272@[y8+1]}	{18267@[y3+1:451.22998, y5+1:637.29191, y7+1:847.42875, y8+1:918.46435, y9+1:1017.53760];[M11+2:664.35288, M11+2:680.33876]}{18271@[y8+1:918.46638, y9+1:1017.53158]}{18272@[y8+1:918.46631]}	{18267@[y3+1:0.00002, y5+1:-0.00210, y7+1:-0.00209, y8+1:-0.00361, y9+1:0.00123];[M11+2:-0.00199, M11+2:-0.00231]}{18271@[y8+1:-0.00158, y9+1:-0.00479]}{18272@[y8+1:-0.00165]}	{18267@[y3+1:0.04, y5+1:-3.30, y7+1:-2.47, y8+1:-3.94, y9+1:1.21];[M11+2:-1.50, M11+2:-1.70]}{18271@[y8+1:-1.72, y9+1:-4.72]}{18272@[y8+1:-1.80]}	{18267@[y3+1:3619, y5+1:7910, y7+1:54178, y8+1:16842, y9+1:11414];[M11+2:91098, M11+2:17779]}{18271@[y8+1:129, y9+1:279]}{18272@[y8+1:11]}	{18267@7}{18271@2}{18272@1}		ApoA1	228	ALGEKAKPVLEDLR	ALGEKAKPVLEDLR(5)	1537.88	5.1967	{18267@[y2+1, y7+1];[b12+1];[M14+2, M14+2]}{18269@[b5+1]}{18270@}	{18267@[y2+1:288.20261, y7+1:841.47500];[b12+1:1305.69978];[M14+2:796.95221, M14+2:812.93841]}{18269@[b5+1:585.26647]}{18270@}	{18267@[y2+1:-0.00041, y7+1:-0.00280];[b12+1:-0.00511];[M14+2:-0.00348, M14+2:-0.00317]}{18269@[b5+1:-0.00365]}{18270@}	{18267@[y2+1:-1.41, y7+1:-3.33];[b12+1:-3.91];[M14+2:-2.19, M14+2:-1.95]}{18269@[b5+1:-6.24]}{18270@}	{18267@[y2+1:8362, y7+1:8957];[b12+1:3983];[M14+2:76175, M14+2:161496]}{18269@[b5+1:50]}{18270@}	{18267@5}{18269@1}{18270@0}		12.3508	158.012	27	2;2	4	9	1
ApoA1	ApoA1	141	230	ApoA1ApoA1141230	K	K	3	W:\Collaboration_Services\Raw_files_FPL\Fusion Lumos\2021\Zheng\20211204_ZS_WP_SV_ns1_xlms\2021-12-04-10-10-24\Task1-Calibrate\20211203_ZS_WP_SV_ns1_R3-calib.mzML	18717	18687	618.581	4	2470.29	Intra	K;K		ApoA1	230	AKPVLEDLR	AKPVLEDLR(2)	1039.6	9.08682	{18717@[b2+1, b2+1];[y2+1, y4+1, y5+1, y6+1, y7+1];[M9+2, M9+2]}{18724@}{18725@}	{18717@[b2+1:254.15008, b2+1:286.12089];[y2+1:288.20271, y4+1:532.27195, y5+1:645.35594, y6+1:744.42403, y7+1:841.47611];[M9+2:547.81360, M9+2:563.79985]}{18724@}{18725@}	{18717@[b2+1:0.00017, b2+1:-0.00110];[y2+1:-0.00031, y4+1:-0.00060, y5+1:-0.00068, y6+1:-0.00100, y7+1:-0.00169];[M9+2:-0.00051, M9+2:-0.00009]}{18724@}{18725@}	{18717@[b2+1:0.66, b2+1:-3.86];[y2+1:-1.07, y4+1:-1.13, y5+1:-1.05, y6+1:-1.34, y7+1:-2.01];[M9+2:-0.46, M9+2:-0.08]}{18724@}{18725@}	{18717@[b2+1:4625, b2+1:5742];[y2+1:16721, y4+1:11272, y5+1:37147, y6+1:7992, y7+1:74709];[M9+2:50832, M9+2:10722]}{18724@}{18725@}	{18717@9}{18724@0}{18725@0}		ApoA1	141	QKVAPLGEEFR	QKVAPLGEEFR(2)	1272.68	9.08368	{18717@[y2+1, y5+1, y7+1, y8+2, y9+1];[b4+1, b4+1];[M11+2, M11+2]}{18722@[y8+1]}{18723@}	{18717@[y2+1:322.18649, y5+1:637.29350, y7+1:847.42987, y8+2:459.73798, y9+1:1017.53458];[b4+1:481.27829, b4+1:513.24669];[M11+2:664.35289, M11+2:680.33869]}{18722@[y8+1:918.46471]}{18723@}	{18717@[y2+1:-0.00087, y5+1:-0.00051, y7+1:-0.00097, y8+2:0.00072, y9+1:-0.00180];[b4+1:0.00138, b4+1:-0.00229];[M11+2:-0.00196, M11+2:-0.00246]}{18722@[y8+1:-0.00325]}{18723@}	{18717@[y2+1:-2.72, y5+1:-0.81, y7+1:-1.15, y8+2:0.79, y9+1:-1.77];[b4+1:2.88, b4+1:-4.48];[M11+2:-1.48, M11+2:-1.81]}{18722@[y8+1:-3.54]}{18723@}	{18717@[y2+1:3980, y5+1:21694, y7+1:71374, y8+2:6529, y9+1:5422];[b4+1:3716, b4+1:7110];[M11+2:39145, M11+2:52839]}{18722@[y8+1:70]}{18723@}	{18717@9}{18722@1}{18723@0}		18.1705	158.009	55	2;2	4	30	21
ApoA1	ApoA1	156	261	ApoA1ApoA1156261	K	K	1	W:\Collaboration_Services\Raw_files_FPL\Fusion Lumos\2021\Zheng\20211204_ZS_WP_SV_ns1_xlms\2021-12-04-10-10-24\Task1-Calibrate\20211203_ZS_WP_SV_ns1_R1-calib.mzML	8332	8314	615.983	3	1844.93	Intra	K;K		ApoA1	261	KLNAQ	KLNAQ(1)	572.328	9.0509	[y2+1, y3+1];[b2+1, b3+1, b3+1, b4+1, b4+1];[M5+1, M5+1]	[y2+1:218.11318, y3+1:332.15580];[b2+1:328.16856, b3+1:410.23924, b3+1:442.20865, b4+1:481.27693, b4+1:513.24759];[M5+1:627.34498, M5+1:659.31736]	[y2+1:-0.00036, y3+1:-0.00066];[b2+1:-0.00038, b3+1:-0.00055, b3+1:-0.00322, b4+1:0.00002, b4+1:-0.00140];[M5+1:-0.00107, M5+1:-0.00077]	[y2+1:-1.64, y3+1:-1.99];[b2+1:-1.18, b3+1:-1.35, b3+1:-7.30, b4+1:0.04, b4+1:-2.73];[M5+1:-1.70, M5+1:-1.17]	[y2+1:9536, y3+1:5271];[b2+1:3019, b3+1:8505, b3+1:3227, b4+1:11881, b4+1:12205];[M5+1:33529, M5+1:43894]	9		ApoA1	156	QKVQELQDK	QKVQELQDK(2)	1114.6	5.05363	{8332@[y5+1, y6+1, y7+1];[M9+1, M9+2]}{8334@[y3+1]}{8335@[b6+1]}	{8332@[y5+1:632.32480, y6+1:760.37975, y7+1:859.45222];[M9+1:1169.61447, M9+2:601.29691]}{8334@[y3+1:390.19988]}{8335@[b6+1:812.39975]}	{8332@[y5+1:-0.00018, y6+1:-0.00381, y7+1:0.00025];[M9+1:-0.00160, M9+2:-0.00160]}{8334@[y3+1:0.00155]}{8335@[b6+1:0.00265]}	{8332@[y5+1:-0.29, y6+1:-5.02, y7+1:0.29];[M9+1:-1.37, M9+2:-1.33]}{8334@[y3+1:3.99]}{8335@[b6+1:3.26]}	{8332@[y5+1:4383, y6+1:9051, y7+1:5602];[M9+1:14518, M9+2:104552]}{8334@[y3+1:50]}{8335@[b6+1:33]}	{8332@5}{8334@1}{8335@1}		14.1045	158	14	2;2	4	53	16
ApoA1	ApoA1	163	163	ApoA1ApoA1163163	K	K	2	W:\Collaboration_Services\Raw_files_FPL\Fusion Lumos\2021\Zheng\20211204_ZS_WP_SV_ns1_xlms\2021-12-04-10-10-24\Task1-Calibrate\20211203_ZS_WP_SV_ns1_R2-calib.mzML	29620	29576	973.518	4	3890.04	Intra	K;K		ApoA1	163	VQELQDKLSPLAQELR	VQELQDKLSPLAQELR(7)	1866.02	6.17188	[y5+1, y7+1, y8+1, y9+1];[b7+1, b9+1]	[y5+1:616.33704, y7+1:826.47716, y8+1:913.50800, y9+1:1026.59795];[b7+1:895.44764, b9+1:1127.53738]	[y5+1:-0.00426, y7+1:-0.00097, y8+1:-0.00215, y9+1:0.00373];[b7+1:-0.00432, b9+1:-0.00276]	[y5+1:-6.92, y7+1:-1.18, y8+1:-2.36, y9+1:3.64];[b7+1:-4.83, b9+1:-2.45]	[y5+1:5172, y7+1:29948, y8+1:26799, y9+1:6984];[b7+1:3749, b9+1:6034]	6		ApoA1	163	VQELQDKLSPLAQELR	VQELQDKLSPLAQELR(7)	1866.02	6.17188	[y5+1, y7+1, y8+1, y9+1];[b7+1, b9+1]	[y5+1:616.33704, y7+1:826.47716, y8+1:913.50800, y9+1:1026.59795];[b7+1:895.44764, b9+1:1127.53738]	[y5+1:-0.00426, y7+1:-0.00097, y8+1:-0.00215, y9+1:0.00373];[b7+1:-0.00432, b9+1:-0.00276]	[y5+1:-6.92, y7+1:-1.18, y8+1:-2.36, y9+1:3.64];[b7+1:-4.83, b9+1:-2.45]	[y5+1:5172, y7+1:29948, y8+1:26799, y9+1:6984];[b7+1:3749, b9+1:6034]	6		12.3438	157.999	5	0;0	0	-	-
ApoA1	ApoA1	214	228	ApoA1ApoA1214228	K	Y	2	W:\Collaboration_Services\Raw_files_FPL\Fusion Lumos\2021\Zheng\20211204_ZS_WP_SV_ns1_xlms\2021-12-04-10-10-24\Task1-Calibrate\20211203_ZS_WP_SV_ns1_R2-calib.mzML	16239	16220	714.968	5	3569.8	Intra	K;Y		ApoA1	228	ALGEKAKPVLEDLR	ALGEKAKPVLEDLR(5)	1537.88	16.1005	{16239@[y2+1, y4+1, y5+1, y7+2, y9+2, y10+2, y12+3, y12+2];[b4+1, b5+1, b6+1, b7+2, b7+1, b12+2];[M14+3, M14+3]}{16243@}{16244@}	{16239@[y2+1:288.20305, y4+1:532.27111, y5+1:645.35721, y7+2:421.24288, y9+2:520.80911, y10+2:611.86148, y12+3:470.26527, y12+2:720.88073];[b4+1:371.19233, b5+1:553.29737, b6+1:624.33606, b7+2:376.71896, b7+1:784.40434, b12+2:653.35721];[M14+3:531.63891, M14+3:542.29646]}{16243@}{16244@}	{16239@[y2+1:0.00003, y4+1:-0.00144, y5+1:0.00059, y7+2:0.00069, y9+2:0.00108, y10+2:0.00030, y12+3:0.00179, y12+2:0.00265];[b4+1:-0.00018, b5+1:-0.00066, b6+1:0.00091, b7+2:0.00054, b7+1:0.00215, b12+2:0.00226];[M14+3:0.00156, M14+3:0.00210]}{16243@}{16244@}	{16239@[y2+1:0.11, y4+1:-2.71, y5+1:0.92, y7+2:0.82, y9+2:1.04, y10+2:0.24, y12+3:1.27, y12+2:1.84];[b4+1:-0.49, b5+1:-1.19, b6+1:1.46, b7+2:0.72, b7+1:2.75, b12+2:1.73];[M14+3:0.98, M14+3:1.30]}{16243@}{16244@}	{16239@[y2+1:120106, y4+1:29485, y5+1:54259, y7+2:166991, y9+2:36076, y10+2:40983, y12+3:107012, y12+2:85080];[b4+1:18135, b5+1:17131, b6+1:56245, b7+2:56131, b7+1:22478, b12+2:58546];[M14+3:584769, M14+3:88713]}{16243@}{16244@}	{16239@16}{16243@0}{16244@0}		ApoA1	214	EGGGSLAEYHAKASEQLK	EGGGSLAEYHAKASEQLK(9)	1873.92	8.0271	[y5+1, y6+1, y10+2, y11+2, y12+2, y13+2];[M18+3, M18+3]	[y5+1:604.33092, y6+1:675.36606, y10+2:614.82050, y11+2:679.34173, y12+2:730.84643, y13+2:771.40191];[M18+3:643.65053, M18+3:654.30752]	[y5+1:0.00085, y6+1:-0.00112, y10+2:0.00167, y11+2:0.00153, y12+2:0.00174, y13+2:0.00072];[M18+3:0.00220, M18+3:0.00109]	[y5+1:1.41, y6+1:-1.66, y10+2:1.36, y11+2:1.13, y12+2:1.19, y13+2:0.46];[M18+3:1.14, M18+3:0.55]	[y5+1:18758, y6+1:31277, y10+2:61892, y11+2:50638, y12+2:53408, y13+2:34131];[M18+3:105881, M18+3:59812]	8		24.1276	158.004	44	2;2	4	2	9
ApoA1	ApoA1	223	223	ApoA1ApoA1223223	K	K	2	W:\Collaboration_Services\Raw_files_FPL\Fusion Lumos\2021\Zheng\20211204_ZS_WP_SV_ns1_xlms\2021-12-04-10-10-24\Task1-Calibrate\20211203_ZS_WP_SV_ns1_R2-calib.mzML	13840	13806	626.828	4	2503.28	Intra	K;K		ApoA1	223	ASEQLKALGEK	ASEQLKALGEK(6)	1172.64	18.2849	[y2+1, y3+1, y4+1, y5+1, y6+1, y6+1, y7+1, y8+1, y9+1];[b4+1, b5+1, b6+1, b6+1, b7+1, b7+1, b8+1, b8+1];[M11+2]	[y2+1:276.15476, y3+1:333.17686, y4+1:446.25999, y5+1:517.29874, y6+1:699.40147, y6+1:731.37592, y7+1:844.46108, y8+1:972.51360, y9+1:1101.56178];[b4+1:416.17563, b5+1:529.26214, b6+1:711.36904, b6+1:743.33949, b7+1:782.40617, b7+1:814.37610, b8+1:895.48583, b8+1:927.46526];[M11+2:614.33273]	[y2+1:-0.00064, y3+1:-0.00000, y4+1:-0.00093, y5+1:0.00070, y6+1:-0.00209, y6+1:0.00028, y7+1:0.00137, y8+1:-0.00469, y9+1:0.00090];[b4+1:-0.00195, b5+1:0.00048, b6+1:0.00186, b6+1:0.00023, b7+1:0.00188, b7+1:-0.00027, b8+1:-0.00252, b8+1:0.00482];[M11+2:0.00025]	[y2+1:-2.32, y3+1:-0.00, y4+1:-2.09, y5+1:1.36, y6+1:-2.99, y6+1:0.38, y7+1:1.63, y8+1:-4.83, y9+1:0.82];[b4+1:-4.71, b5+1:0.92, b6+1:2.62, b6+1:0.32, b7+1:2.40, b7+1:-0.33, b8+1:-2.82, b8+1:5.21];[M11+2:0.21]	[y2+1:7777, y3+1:30100, y4+1:21446, y5+1:43635, y6+1:7880, y6+1:26069, y7+1:10968, y8+1:8262, y9+1:4820];[b4+1:5822, b5+1:13595, b6+1:6730, b6+1:16273, b7+1:6301, b7+1:8045, b8+1:9287, b8+1:18465];[M11+2:210145]	18		ApoA1	223	ASEQLKALGEK	ASEQLKALGEK(6)	1172.64	18.2849	[y2+1, y3+1, y4+1, y5+1, y6+1, y6+1, y7+1, y8+1, y9+1];[b4+1, b5+1, b6+1, b6+1, b7+1, b7+1, b8+1, b8+1];[M11+2]	[y2+1:276.15476, y3+1:333.17686, y4+1:446.25999, y5+1:517.29874, y6+1:699.40147, y6+1:731.37592, y7+1:844.46108, y8+1:972.51360, y9+1:1101.56178];[b4+1:416.17563, b5+1:529.26214, b6+1:711.36904, b6+1:743.33949, b7+1:782.40617, b7+1:814.37610, b8+1:895.48583, b8+1:927.46526];[M11+2:614.33273]	[y2+1:-0.00064, y3+1:-0.00000, y4+1:-0.00093, y5+1:0.00070, y6+1:-0.00209, y6+1:0.00028, y7+1:0.00137, y8+1:-0.00469, y9+1:0.00090];[b4+1:-0.00195, b5+1:0.00048, b6+1:0.00186, b6+1:0.00023, b7+1:0.00188, b7+1:-0.00027, b8+1:-0.00252, b8+1:0.00482];[M11+2:0.00025]	[y2+1:-2.32, y3+1:-0.00, y4+1:-2.09, y5+1:1.36, y6+1:-2.99, y6+1:0.38, y7+1:1.63, y8+1:-4.83, y9+1:0.82];[b4+1:-4.71, b5+1:0.92, b6+1:2.62, b6+1:0.32, b7+1:2.40, b7+1:-0.33, b8+1:-2.82, b8+1:5.21];[M11+2:0.21]	[y2+1:7777, y3+1:30100, y4+1:21446, y5+1:43635, y6+1:7880, y6+1:26069, y7+1:10968, y8+1:8262, y9+1:4820];[b4+1:5822, b5+1:13595, b6+1:6730, b6+1:16273, b7+1:6301, b7+1:8045, b8+1:9287, b8+1:18465];[M11+2:210145]	18		36.5699	158.004	21	1;1	2	1	1
ApoA1	ApoA1	223	261	ApoA1ApoA1223261	K	K	1	W:\Collaboration_Services\Raw_files_FPL\Fusion Lumos\2021\Zheng\20211204_ZS_WP_SV_ns1_xlms\2021-12-04-10-10-24\Task1-Calibrate\20211203_ZS_WP_SV_ns1_R1-calib.mzML	11299	11289	635.332	3	1902.97	Intra	K;K		ApoA1	223	ASEQLKALGEK	ASEQLKALGEK(6)	1172.64	16.2107	[y2+1, y3+1, y4+1, y5+1, y6+1, y6+1, y8+1];[b5+1, b6+1, b6+1, b7+1, b8+1, b8+1, b10+1, b10+1];[M11+2]	[y2+1:276.15507, y3+1:333.17735, y4+1:446.26040, y5+1:517.29735, y6+1:699.40597, y6+1:731.37730, y8+1:972.52079];[b5+1:529.25989, b6+1:711.36746, b6+1:743.33605, b7+1:814.37502, b8+1:895.48602, b8+1:927.45879, b10+1:1081.55581, b10+1:1113.52531];[M11+2:614.33232]	[y2+1:-0.00033, y3+1:0.00048, y4+1:-0.00052, y5+1:-0.00068, y6+1:0.00241, y6+1:0.00166, y8+1:0.00250];[b5+1:-0.00176, b6+1:0.00029, b6+1:-0.00321, b7+1:-0.00135, b8+1:-0.00233, b8+1:-0.00165, b10+1:0.00340, b10+1:0.00082];[M11+2:-0.00057]	[y2+1:-1.19, y3+1:1.46, y4+1:-1.17, y5+1:-1.32, y6+1:3.45, y6+1:2.27, y8+1:2.58];[b5+1:-3.33, b6+1:0.40, b6+1:-4.33, b7+1:-1.66, b8+1:-2.61, b8+1:-1.78, b10+1:3.15, b10+1:0.73];[M11+2:-0.47]	[y2+1:5356, y3+1:34675, y4+1:10989, y5+1:26498, y6+1:5400, y6+1:9232, y8+1:5594];[b5+1:12103, b6+1:5556, b6+1:13558, b7+1:6856, b8+1:12192, b8+1:17282, b10+1:4319, b10+1:7840];[M11+2:242381]	16		ApoA1	261	KLNAQ	KLNAQ(1)	572.328	8.13437	[y2+1, y3+1];[b3+1, b3+1, b4+1, b4+1];[M5+1, M5+1]	[y2+1:218.11268, y3+1:332.15690];[b3+1:410.23780, b3+1:442.21286, b4+1:481.27693, b4+1:513.24884];[M5+1:627.34549, M5+1:659.31753]	[y2+1:-0.00085, y3+1:0.00044];[b3+1:-0.00199, b3+1:0.00099, b4+1:0.00003, b4+1:-0.00015];[M5+1:-0.00056, M5+1:-0.00060]	[y2+1:-3.91, y3+1:1.32];[b3+1:-4.85, b3+1:2.23, b4+1:0.05, b4+1:-0.28];[M5+1:-0.89, M5+1:-0.91]	[y2+1:4652, y3+1:6074];[b3+1:4717, b3+1:6641, b4+1:12922, b4+1:23410];[M5+1:88455, M5+1:120822]	8		24.3451	158.006	29	1;2	3	55	42
ApoA1	ApoA1	63	156	ApoA1ApoA163156	K	K	1	W:\Collaboration_Services\Raw_files_FPL\Fusion Lumos\2021\Zheng\20211204_ZS_WP_SV_ns1_xlms\2021-12-04-10-10-24\Task1-Calibrate\20211203_ZS_WP_SV_ns1_R1-calib.mzML	24956	24900	817.67	4	3266.65	Intra	K;K		ApoA1	63	DYVAQFEASALGKQLNLK	DYVAQFEASALGKQLNLK(13)	1994.05	9.03322	[b2+1, b3+1, b4+1, b7+1, b8+1, b11+1, b12+1];[y4+1, y5+1]	[b2+1:279.09800, b3+1:378.16628, b4+1:449.20373, b7+1:853.37788, b8+1:924.41189, b11+1:1195.56383, b12+1:1252.57805];[y4+1:487.32389, y5+1:615.38313]	[b2+1:0.00045, b3+1:0.00031, b4+1:0.00066, b7+1:0.00522, b8+1:0.00211, b11+1:0.00085, b12+1:-0.00639];[y4+1:0.00003, y5+1:0.00069]	[b2+1:1.62, b3+1:0.83, b4+1:1.47, b7+1:6.12, b8+1:2.29, b11+1:0.71, b12+1:-5.11];[y4+1:0.06, y5+1:1.13]	[b2+1:16953, b3+1:22637, b4+1:7544, b7+1:9135, b8+1:8516, b11+1:21585, b12+1:6801];[y4+1:10132, y5+1:12685]	9		ApoA1	156	QKVQELQDK	QKVQELQDK(2)	1114.6	5.06346	{24956@[y6+1, y7+1];[M9+2, M9+2];[b5+1]}{24959@}{24960@[b1+1];[y3+1]}{24961@}	{24956@[y6+1:760.38493, y7+1:859.45369];[M9+2:585.31276, M9+2:601.29822];[b5+1:699.31101]}{24959@}{24960@[b1+1:129.06680];[y3+1:390.20040]}{24961@}	{24956@[y6+1:0.00137, y7+1:0.00172];[M9+2:0.00216, M9+2:0.00100];[b5+1:-0.00203]}{24959@}{24960@[b1+1:0.00094];[y3+1:0.00208]}{24961@}	{24956@[y6+1:1.80, y7+1:2.00];[M9+2:1.85, M9+2:0.83];[b5+1:-2.91]}{24959@}{24960@[b1+1:7.35];[y3+1:5.34]}{24961@}	{24956@[y6+1:13503, y7+1:13955];[M9+2:124026, M9+2:63289];[b5+1:6822]}{24959@}{24960@[b1+1:10];[y3+1:37]}{24961@}	{24956@5}{24959@0}{24960@2}{24961@0}		14.0967	158.007	1	0;2	2	-	3
ApoA1	ApoA1	68	156	ApoA1ApoA168156	K	K	2	W:\Collaboration_Services\Raw_files_FPL\Fusion Lumos\2021\Zheng\20211204_ZS_WP_SV_ns1_xlms\2021-12-04-10-10-24\Task1-Calibrate\20211203_ZS_WP_SV_ns1_R2-calib.mzML	30000	29956	862.201	4	3444.77	Intra	K;K		ApoA1	68	QLNLKLLDNWDTLASTLSK	QLNLKLLDNWDTLASTLSK(5)	2172.18	14.1207	{30000@[y3+1, y4+1, y5+1, y6+1, y7+1, y8+1, y9+1, y11+1, y12+1, y13+1, y14+1];[b4+1];[M19+2, M19+2]}{30004@}{30005@}	{30000@[y3+1:347.22816, y4+1:448.27744, y5+1:535.30958, y6+1:606.34710, y7+1:719.43203, y8+1:820.47963, y9+1:935.50631, y11+1:1235.63078, y12+1:1350.65722, y13+1:1463.74082, y14+1:1576.82068];[b4+1:469.27707];[M19+2:1114.10177, M19+2:1130.08996]}{30004@}{30005@}	{30000@[y3+1:-0.00074, y4+1:0.00087, y5+1:0.00097, y6+1:0.00138, y7+1:0.00225, y8+1:0.00217, y9+1:0.00191, y11+1:0.00413, y12+1:0.00363, y13+1:0.00317, y14+1:-0.00103];[b4+1:0.00016];[M19+2:-0.00061, M19+2:0.00370]}{30004@}{30005@}	{30000@[y3+1:-2.13, y4+1:1.94, y5+1:1.82, y6+1:2.28, y7+1:3.13, y8+1:2.65, y9+1:2.04, y11+1:3.35, y12+1:2.69, y13+1:2.17, y14+1:-0.65];[b4+1:0.34];[M19+2:-0.27, M19+2:1.64]}{30004@}{30005@}	{30000@[y3+1:4173, y4+1:4104, y5+1:10781, y6+1:15409, y7+1:3590, y8+1:9635, y9+1:25364, y11+1:6007, y12+1:22543, y13+1:6223, y14+1:4273];[b4+1:3849];[M19+2:26632, M19+2:65950]}{30004@}{30005@}	{30000@14}{30004@0}{30005@0}		ApoA1	156	QKVQELQDK	QKVQELQDK(2)	1114.6	5.08345	{30000@[y4+1, y5+1, y6+1];[M9+2, M9+2]}{30002@[y3+1]}{30003@}	{30000@[y4+1:503.28313, y5+1:632.32554, y6+1:760.38519];[M9+2:585.31287, M9+2:601.29951]}{30002@[y3+1:390.20095]}{30003@}	{30000@[y4+1:0.00074, y5+1:0.00056, y6+1:0.00163];[M9+2:0.00239, M9+2:0.00358]}{30002@[y3+1:0.00263]}{30003@}	{30000@[y4+1:1.48, y5+1:0.89, y6+1:2.15];[M9+2:2.04, M9+2:2.99]}{30002@[y3+1:6.75]}{30003@}	{30000@[y4+1:9058, y5+1:12637, y6+1:18123];[M9+2:80006, M9+2:24340]}{30002@[y3+1:39]}{30003@}	{30000@5}{30002@1}{30003@0}		19.2042	157.998	1	2;2	4	2	3
ApoA1	ApoA1	82	223	ApoA1ApoA182223	K	K	1	W:\Collaboration_Services\Raw_files_FPL\Fusion Lumos\2021\Zheng\20211204_ZS_WP_SV_ns1_xlms\2021-12-04-10-10-24\Task1-Calibrate\20211203_ZS_WP_SV_ns1_R1-calib.mzML	27929	27877	791.415	4	3161.63	Intra	K;K		ApoA1	223	ASEQLKALGEK	ASEQLKALGEK(6)	1172.64	20.1886	{27929@[y3+1, y4+1, y5+1, y6+1, y6+1, y7+1, y8+1, y9+1];[b5+1, b6+1, b6+1, b7+1, b7+1, b8+1, b8+1, b9+1, b10+1, b10+1];[M11+2, M11+2]}{27933@[y6+1]}{27934@}	{27929@[y3+1:333.17719, y4+1:446.26105, y5+1:517.29848, y6+1:699.40237, y6+1:731.38043, y7+1:812.48745, y8+1:940.54613, y9+1:1069.58816];[b5+1:529.26167, b6+1:711.36747, b6+1:743.34028, b7+1:782.40543, b7+1:814.37805, b8+1:895.48636, b8+1:927.46042, b9+1:952.50506, b10+1:1081.55204, b10+1:1113.53119];[M11+2:614.33264, M11+2:630.31894]}{27933@[y6+1:699.40058]}{27934@}	{27929@[y3+1:0.00032, y4+1:0.00013, y5+1:0.00044, y6+1:-0.00119, y6+1:0.00478, y7+1:-0.00018, y8+1:-0.00008, y9+1:-0.00063];[b5+1:0.00001, b6+1:0.00029, b6+1:0.00102, b7+1:0.00114, b7+1:0.00168, b8+1:-0.00199, b8+1:-0.00001, b9+1:-0.00476, b10+1:-0.00037, b10+1:0.00670];[M11+2:0.00006, M11+2:0.00059]}{27933@[y6+1:-0.00298]}{27934@}	{27929@[y3+1:0.98, y4+1:0.28, y5+1:0.86, y6+1:-1.70, y6+1:6.55, y7+1:-0.22, y8+1:-0.08, y9+1:-0.59];[b5+1:0.03, b6+1:0.41, b6+1:1.37, b7+1:1.46, b7+1:2.07, b8+1:-2.23, b8+1:-0.01, b9+1:-5.00, b10+1:-0.34, b10+1:6.03];[M11+2:0.05, M11+2:0.47]}{27933@[y6+1:-4.27]}{27934@}	{27929@[y3+1:78144, y4+1:30785, y5+1:86281, y6+1:64664, y6+1:32873, y7+1:34547, y8+1:29772, y9+1:12706];[b5+1:31925, b6+1:27564, b6+1:8925, b7+1:31494, b7+1:9441, b8+1:63439, b8+1:17912, b9+1:20449, b10+1:25929, b10+1:11522];[M11+2:641743, M11+2:174065]}{27933@[y6+1:724]}{27934@}	{27929@20}{27933@1}{27934@0}		ApoA1	82	LLDNWDTLASTLSKVR	LLDNWDTLASTLSKVR(14)	1830.98	18.1564	{27929@[y2+1, y3+1, y4+1, y5+1, y8+1, y11+1, y14+2];[b4+1, b5+1, b6+1, b7+1, b8+1, b9+1, b11+1, b14+1, b15+1];[M16+2, M16+2]}{27931@[y14+1]}{27932@[y13+1]}	{27929@[y2+1:274.18760, y3+1:456.29313, y4+1:543.32455, y5+1:656.40875, y8+1:915.52389, y11+1:1244.67950, y14+2:846.40558];[b4+1:456.24641, b5+1:642.32353, b6+1:757.34895, b7+1:858.39719, b8+1:971.48432, b9+1:1042.52225, b11+1:1230.60575, b14+1:1644.78859, b15+1:1743.85811];[M16+2:943.50391, M16+2:959.49035]}{27931@[y14+1:1691.80145]}{27932@[y13+1:1544.80131]}	{27929@[y2+1:0.00024, y3+1:0.00024, y4+1:-0.00037, y5+1:-0.00024, y8+1:-0.00191, y11+1:-0.00499, y14+2:-0.00186];[b4+1:0.00114, b5+1:-0.00106, b6+1:-0.00258, b7+1:-0.00202, b8+1:0.00105, b9+1:0.00186, b11+1:0.00566, b14+1:-0.00520, b15+1:-0.00410];[M16+2:-0.00125, M16+2:-0.00045]}{27931@[y14+1:-0.00430]}{27932@[y13+1:-0.00542]}	{27929@[y2+1:0.87, y3+1:0.53, y4+1:-0.69, y5+1:-0.36, y8+1:-2.09, y11+1:-4.01, y14+2:-1.10];[b4+1:2.49, b5+1:-1.65, b6+1:-3.41, b7+1:-2.35, b8+1:1.08, b9+1:1.79, b11+1:4.60, b14+1:-3.16, b15+1:-2.35];[M16+2:-0.66, M16+2:-0.23]}{27931@[y14+1:-2.54]}{27932@[y13+1:-3.51]}	{27929@[y2+1:20154, y3+1:11829, y4+1:37163, y5+1:20450, y8+1:21492, y11+1:10435, y14+2:35752];[b4+1:9746, b5+1:18790, b6+1:8808, b7+1:11656, b8+1:26021, b9+1:29405, b11+1:14103, b14+1:14785, b15+1:26519];[M16+2:200324, M16+2:672434]}{27931@[y14+1:620]}{27932@[y13+1:32]}	{27929@18}{27931@1}{27932@1}		38.345	158.007	74	2;2	4	2	6
ApoA1	ApoA1	82	228	ApoA1ApoA182228	K	K	1	W:\Collaboration_Services\Raw_files_FPL\Fusion Lumos\2021\Zheng\20211204_ZS_WP_SV_ns1_xlms\2021-12-04-10-10-24\Task1-Calibrate\20211203_ZS_WP_SV_ns1_R1-calib.mzML	28504	28470	706.382	5	3526.88	Intra	K;K		ApoA1	82	LLDNWDTLASTLSKVR	LLDNWDTLASTLSKVR(14)	1830.98	9.06603	[y2+1, y3+1, y4+1];[b6+1, b7+1, b8+1, b9+2];[M16+2, M16+2]	[y2+1:274.18769, y3+1:456.29525, y4+1:543.32831];[b6+1:757.35165, b7+1:858.40097, b8+1:971.48289, b9+2:521.76385];[M16+2:943.50359, M16+2:959.48995]	[y2+1:0.00032, y3+1:0.00236, y4+1:0.00340];[b6+1:0.00012, b7+1:0.00176, b8+1:-0.00038, b9+2:0.00003];[M16+2:-0.00189, M16+2:-0.00126]	[y2+1:1.18, y3+1:5.18, y4+1:6.26];[b6+1:0.16, b7+1:2.05, b8+1:-0.40, b9+2:0.03];[M16+2:-1.00, M16+2:-0.66]	[y2+1:8476, y3+1:12449, y4+1:12358];[b6+1:8494, b7+1:10007, b8+1:16154, b9+2:17202];[M16+2:34863, M16+2:62642]	9		ApoA1	228	ALGEKAKPVLEDLR	ALGEKAKPVLEDLR(5)	1537.88	4.03405	{28504@[y2+1, y7+2];[M14+3, M14+3]}{28507@}{28508@[b6+1]}{28509@[b6+1]}{28510@}	{28504@[y2+1:288.20324, y7+2:421.24382];[M14+3:531.63871, M14+3:542.29584]}{28507@}{28508@[b6+1:624.33408]}{28509@[b6+1:624.33414]}{28510@}	{28504@[y2+1:0.00022, y7+2:0.00257];[M14+3:0.00094, M14+3:0.00026]}{28507@}{28508@[b6+1:-0.00107]}{28509@[b6+1:-0.00101]}{28510@}	{28504@[y2+1:0.78, y7+2:3.06];[M14+3:0.59, M14+3:0.16]}{28507@}{28508@[b6+1:-1.71]}{28509@[b6+1:-1.62]}{28510@}	{28504@[y2+1:17400, y7+2:10001];[M14+3:45236, M14+3:21554]}{28507@}{28508@[b6+1:16]}{28509@[b6+1:23]}{28510@}	{28504@4}{28507@0}{28508@1}{28509@1}{28510@0}		13.1001	158.008	29	2;2	4	2	7
ApoA1	NS1	117	120	ApoA1NS1117120	K	K	2	W:\Collaboration_Services\Raw_files_FPL\Fusion Lumos\2021\Zheng\20211204_ZS_WP_SV_ns1_xlms\2021-12-04-10-10-24\Task1-Calibrate\20211203_ZS_WP_SV_ns1_R2-calib.mzML	10398	10369	452.233	4	1804.9	Inter	K;K		ApoA1	117	DLEEVKQK	DLEEVKQK(6)	987.524	18.1704	{10398@[y1+1, y2+1, y3+1, y3+1, y4+1, y4+1, y5+1, y5+1, y6+2, y6+2];[b2+1, b3+1, b4+1, b5+1, b6+1, b7+1];[M8+2, M8+2]}{10404@}	{10398@[y1+1:147.11362, y2+1:275.17201, y3+1:457.27754, y3+1:489.24917, y4+1:556.34519, y4+1:588.31496, y5+1:685.39145, y5+1:717.36079, y6+2:407.71907, y6+2:423.70519];[b2+1:229.11865, b3+1:358.16149, b4+1:487.20288, b5+1:586.27364, b6+1:800.34492, b7+1:928.40918];[M8+2:521.77501, M8+2:537.76098]}{10404@}	{10398@[y1+1:0.00082, y2+1:0.00063, y3+1:0.00063, y3+1:0.00019, y4+1:-0.00013, y4+1:-0.00244, y5+1:0.00354, y5+1:0.00080, y6+2:0.00036, y6+2:0.00052];[b2+1:0.00037, b3+1:0.00061, b4+1:-0.00059, b5+1:0.00175, b6+1:-0.00457, b7+1:0.00112];[M8+2:0.00124, M8+2:0.00109]}{10404@}	{10398@[y1+1:5.60, y2+1:2.30, y3+1:1.38, y3+1:0.38, y4+1:-0.23, y4+1:-4.15, y5+1:5.17, y5+1:1.12, y6+2:0.45, y6+2:0.61];[b2+1:1.60, b3+1:1.71, b4+1:-1.21, b5+1:3.00, b6+1:-5.72, b7+1:1.21];[M8+2:1.19, M8+2:1.02]}{10404@}	{10398@[y1+1:2548, y2+1:17009, y3+1:78721, y3+1:47611, y4+1:8181, y4+1:19147, y5+1:7995, y5+1:17702, y6+2:31660, y6+2:14244];[b2+1:66510, b3+1:17465, b4+1:12767, b5+1:15699, b6+1:5329, b7+1:5635];[M8+2:64706, M8+2:111684]}{10404@}	{10398@18}{10404@0}		NS1	120	AWGKAK	AWGKAK(4)	659.375	4.10921	{10398@[b2+1];[y2+1];[M6+2, M6+2]}{10402@}{10403@}	{10398@[b2+1:258.12450];[y2+1:218.14970];[M6+2:357.70095, M6+2:373.68641]}{10402@}{10403@}	{10398@[b2+1:0.00080];[y2+1:-0.00022];[M6+2:0.00130, M6+2:0.00013]}{10402@}{10403@}	{10398@[b2+1:3.11];[y2+1:-1.00];[M6+2:1.82, M6+2:0.18]}{10402@}{10403@}	{10398@[b2+1:58507];[y2+1:3485];[M6+2:239166, M6+2:47980]}{10402@}{10403@}	{10398@4}{10402@0}{10403@0}		22.2796	158.005	16	2;2	4	3	2
ApoA1	NS1	119	122	ApoA1NS1119122	K	K	1	W:\Collaboration_Services\Raw_files_FPL\Fusion Lumos\2021\Zheng\20211204_ZS_WP_SV_ns1_xlms\2021-12-04-10-10-24\Task1-Calibrate\20211203_ZS_WP_SV_ns1_R1-calib.mzML	10392	10387	452.233	4	1804.9	Inter	K;K		ApoA1	119	DLEEVKQK	DLEEVKQK(8)	987.524	15.1993	{10392@[y1+1, y3+1, y3+1, y4+1, y4+1, y5+1, y5+1, y6+2, y6+2];[b2+1, b3+1, b4+1, b5+1];[M8+2, M8+2]}{10395@[y6+1]}	{10392@[y1+1:201.12395, y3+1:457.27753, y3+1:489.24986, y4+1:556.34639, y4+1:588.31995, y5+1:685.38639, y5+1:717.35928, y6+2:407.71932, y6+2:423.70544];[b2+1:229.11875, b3+1:358.16090, b4+1:487.20477, b5+1:586.27211];[M8+2:521.77455, M8+2:537.76112]}{10395@[y6+1:846.39985]}	{10392@[y1+1:0.00059, y3+1:0.00062, y3+1:0.00087, y4+1:0.00107, y4+1:0.00255, y5+1:-0.00152, y5+1:-0.00071, y6+2:0.00086, y6+2:0.00102];[b2+1:0.00047, b3+1:0.00002, b4+1:0.00130, b5+1:0.00022];[M8+2:0.00031, M8+2:0.00138]}{10395@[y6+1:-0.00274]}	{10392@[y1+1:2.92, y3+1:1.37, y3+1:1.79, y4+1:1.93, y4+1:4.35, y5+1:-2.23, y5+1:-1.00, y6+2:1.06, y6+2:1.20];[b2+1:2.05, b3+1:0.07, b4+1:2.68, b5+1:0.38];[M8+2:0.30, M8+2:1.28]}{10395@[y6+1:-3.24]}	{10392@[y1+1:99453, y3+1:56786, y3+1:46626, y4+1:3533, y4+1:10096, y5+1:5734, y5+1:15312, y6+2:35258, y6+2:10888];[b2+1:46867, b3+1:10897, b4+1:7937, b5+1:13936];[M8+2:61223, M8+2:99446]}{10395@[y6+1:265]}	{10392@15}{10395@1}		NS1	122	AWGKAK	AWGKAK(6)	659.375	3.11051	{10392@[b2+1];[M6+2, M6+2]}{10393@}{10394@}	{10392@[b2+1:258.12421];[M6+2:357.70094, M6+2:373.68677]}{10393@}{10394@}	{10392@[b2+1:0.00051];[M6+2:0.00127, M6+2:0.00086]}{10393@}{10394@}	{10392@[b2+1:1.99];[M6+2:1.78, M6+2:1.15]}{10393@}{10394@}	{10392@[b2+1:51382];[M6+2:200053, M6+2:39092]}{10393@}{10394@}	{10392@3}{10393@0}{10394@0}		18.3098	158.004	21	2;2	4	3	2
NS1	ApoA1	11	129	NS1ApoA111129	K	K	1	W:\Collaboration_Services\Raw_files_FPL\Fusion Lumos\2021\Zheng\20211204_ZS_WP_SV_ns1_xlms\2021-12-04-10-10-24\Task1-Calibrate\20211203_ZS_WP_SV_ns1_R1-calib.mzML	13847	13836	546.532	4	2182.1	Inter	K;K		ApoA1	129	VQPYLDEFQKK	VQPYLDEFQKK(10)	1393.72	8.11582	{13847@[b2+1, b5+1, b6+1];[y6+1, y9+2, y9+2];[M11+3, M11+2]}{13851@[b2+1];[y7+1, y8+1]}{13852@[b2+1]}	{13847@[b2+1:228.13464, b5+1:601.33667, b6+1:716.36530];[y6+1:880.38756, y9+2:611.31125, y9+2:627.29720];[M11+3:483.58580, M11+2:740.86091]}{13851@[b2+1:228.13348];[y7+1:993.46587, y8+1:1156.53408]}{13852@[b2+1:228.13348]}	{13847@[b2+1:0.00037, b5+1:0.00224, b6+1:0.00394];[y6+1:0.00062, y9+2:0.00021, y9+2:0.00002];[M11+3:0.00086, M11+2:0.00047]}{13851@[b2+1:-0.00079];[y7+1:-0.00513, y8+1:-0.00025]}{13852@[b2+1:-0.00079]}	{13847@[b2+1:1.62, b5+1:3.74, b6+1:5.50];[y6+1:0.71, y9+2:0.17, y9+2:0.02];[M11+3:0.59, M11+2:0.31]}{13851@[b2+1:-3.49];[y7+1:-5.17, y8+1:-0.21]}{13852@[b2+1:-3.49]}	{13847@[b2+1:103344, b5+1:7621, b6+1:7733];[y6+1:7037, y9+2:117466, y9+2:103252];[M11+3:23192, M11+2:240247]}{13851@[b2+1:156];[y7+1:55, y8+1:110]}{13852@[b2+1:95]}	{13847@8}{13851@3}{13852@1}		NS1	11	NKELK	NKELK(2)	630.37	6.0777	{13847@[b2+1, b4+1];[y2+1, y3+1];[M5+2, M5+1]}{13849@[b3+1]}{13850@}	{13847@[b2+1:297.15579, b4+1:539.28194];[y2+1:260.19697, y3+1:389.23959];[M5+2:343.19766, M5+1:717.35996]}{13849@[b3+1:426.20024]}{13850@}	{13847@[b2+1:0.00006, b4+1:-0.00044];[y2+1:0.00010, y3+1:0.00012];[M5+2:0.00013, M5+1:-0.00004]}{13849@[b3+1:0.00192]}{13850@}	{13847@[b2+1:0.21, b4+1:-0.82];[y2+1:0.38, y3+1:0.32];[M5+2:0.18, M5+1:-0.05]}{13849@[b3+1:4.51]}{13850@}	{13847@[b2+1:8266, b4+1:6825];[y2+1:20757, y3+1:12913];[M5+2:314897, M5+1:45497]}{13849@[b3+1:110]}{13850@}	{13847@6}{13849@1}{13850@0}		14.1935	158.004	264	2;2	4	2	3
NS1	ApoA1	112	129	NS1ApoA1112129	K	K	2	W:\Collaboration_Services\Raw_files_FPL\Fusion Lumos\2021\Zheng\20211204_ZS_WP_SV_ns1_xlms\2021-12-04-10-10-24\Task1-Calibrate\20211203_ZS_WP_SV_ns1_R2-calib.mzML	18946	18892	657.74	5	3283.66	Inter	K;K		NS1	112	SLRPQPTELKYSWK	SLRPQPTELKYSWK(10)	1731.93	6.01862	{18946@[y3+1, y4+1, y7+1];[b5+1, b9+2];[M14+2]}{18954@[b10+1]}{18955@}	{18946@[y3+1:420.22406, y4+1:583.28806, y7+1:1007.52173];[b5+1:582.33890, b9+2:511.78523];[M14+2:893.97771]}{18954@[b10+1:1204.66518]}{18955@}	{18946@[y3+1:-0.00009, y4+1:0.00059, y7+1:0.00207];[b5+1:0.00308, b9+2:0.00026];[M14+2:-0.00050]}{18954@[b10+1:-0.00327]}{18955@}	{18946@[y3+1:-0.22, y4+1:1.01, y7+1:2.06];[b5+1:5.30, b9+2:0.26];[M14+2:-0.28]}{18954@[b10+1:-2.71]}{18955@}	{18946@[y3+1:6962, y4+1:19766, y7+1:7477];[b5+1:7445, b9+2:7936];[M14+2:14218]}{18954@[b10+1:58]}{18955@}	{18946@6}{18954@1}{18955@0}		ApoA1	129	VQPYLDEFQKK	VQPYLDEFQKK(10)	1393.72	5.06149	{18946@[b2+1, b6+1];[y9+2, y9+2];[M11+2]}{18952@[b2+1];[y7+1, y8+1]}{18953@}	{18946@[b2+1:228.13336, b6+1:716.36265];[y9+2:611.31118, y9+2:627.29772];[M11+2:740.86047]}{18952@[b2+1:228.13334];[y7+1:993.46673, y8+1:1156.53341]}{18953@}	{18946@[b2+1:-0.00091, b6+1:0.00129];[y9+2:0.00007, y9+2:0.00107];[M11+2:-0.00041]}{18952@[b2+1:-0.00092];[y7+1:-0.00426, y8+1:-0.00091]}{18953@}	{18946@[b2+1:-4.00, b6+1:1.80];[y9+2:0.05, y9+2:0.86];[M11+2:-0.28]}{18952@[b2+1:-4.07];[y7+1:-4.30, y8+1:-0.79]}{18953@}	{18946@[b2+1:12045, b6+1:9717];[y9+2:26550, y9+2:51796];[M11+2:110597]}{18952@[b2+1:329];[y7+1:202, y8+1:29]}{18953@}	{18946@5}{18952@3}{18953@0}		11.0801	158.009	2	1;1	2	29	5
NS1	ApoA1	112	141	NS1ApoA1112141	K	K	2	W:\Collaboration_Services\Raw_files_FPL\Fusion Lumos\2021\Zheng\20211204_ZS_WP_SV_ns1_xlms\2021-12-04-10-10-24\Task1-Calibrate\20211203_ZS_WP_SV_ns1_R2-calib.mzML	15670	15628	661.727	5	3303.6	Inter	K;K		NS1	112	SLRPQPTELKYSWK	SLRPQPTELKY[DSSO:DSSO_alkene_Y on Y]S[DSSO:DSSO_thiol_S on S]WK(10)	1871.92	8.03738	[y2+1];[b3+1, b5+1, b7+2, b8+2, b9+2, b10+2, b10+2]	[y2+1:333.19399];[b3+1:357.22425, b5+1:582.33611, b7+2:390.72262, b8+2:455.24375, b9+2:511.78622, b10+2:602.83872, b10+2:618.82605]	[y2+1:0.00188];[b3+1:-0.00023, b5+1:0.00029, b7+2:0.00171, b8+2:0.00137, b9+2:0.00225, b10+2:0.00171, b10+2:0.00431]	[y2+1:5.65];[b3+1:-0.64, b5+1:0.50, b7+2:2.19, b8+2:1.51, b9+2:2.20, b10+2:1.42, b10+2:3.48]	[y2+1:13433];[b3+1:20898, b5+1:46933, b7+2:49738, b8+2:68627, b9+2:107400, b10+2:177164, b10+2:35015]	8		ApoA1	141	QKVAPLGEEFR	Q[Common Artifact:Deamidation on Q]KVAPLGEEFR(2)	1273.67	4.00676	[y3+1, y5+1, y7+1];[b7+1]	[y3+1:451.23020, y5+1:637.29571, y7+1:847.42758];[b7+1:781.38958]	[y3+1:0.00024, y5+1:0.00169, y7+1:-0.00327];[b7+1:-0.00171]	[y3+1:0.53, y5+1:2.66, y7+1:-3.86];[b7+1:-2.19]	[y3+1:19899, y5+1:19257, y7+1:15430];[b7+1:39327]	4		12.0441	158.01	47	0;0	0	-	-
NS1	ApoA1	11	230	NS1ApoA111230	K	K	1	W:\Collaboration_Services\Raw_files_FPL\Fusion Lumos\2021\Zheng\20211204_ZS_WP_SV_ns1_xlms\2021-12-04-10-10-24\Task1-Calibrate\20211203_ZS_WP_SV_ns1_R1-calib.mzML	18813	18746	826.41	3	2476.21	Inter	K;K		NS1	11	DSGCVVSWKNK	DSGC[Common Fixed:Carbamidomethyl on C]VVSWKNK(11)	1278.6	11.1718	{18813@[b4+1, b5+1, b6+1, b10+1];[y5+1, y5+1, y6+1, y6+1, y7+1];[M11+1, M11+1]}{18817@}{18818@[b9+1]}	{18813@[b4+1:420.11643, b5+1:519.18595, b6+1:618.25394, b10+1:1133.50183];[y5+1:716.37204, y5+1:748.34125, y6+1:815.43685, y6+1:847.40943, y7+1:914.51180];[M11+1:1333.61673, M11+1:1365.58829]}{18817@}{18818@[b9+1:1019.46603]}	{18813@[b4+1:-0.00193, b5+1:-0.00083, b6+1:-0.00125, b10+1:-0.00259];[y5+1:-0.00056, y5+1:-0.00342, y6+1:-0.00416, y6+1:-0.00366, y7+1:0.00238];[M11+1:-0.00377, M11+1:-0.00430]}{18817@}{18818@[b9+1:0.00454]}	{18813@[b4+1:-4.61, b5+1:-1.60, b6+1:-2.03, b10+1:-2.28];[y5+1:-0.78, y5+1:-4.58, y6+1:-5.10, y6+1:-4.33, y7+1:2.60];[M11+1:-2.83, M11+1:-3.15]}{18817@}{18818@[b9+1:4.46]}	{18813@[b4+1:2560, b5+1:3146, b6+1:14530, b10+1:5965];[y5+1:14325, y5+1:8283, y6+1:8375, y6+1:5172, y7+1:4250];[M11+1:114476, M11+1:100463]}{18817@}{18818@[b9+1:71]}	{18813@11}{18817@0}{18818@1}		ApoA1	230	AKPVLEDLR	AKPVLEDLR(2)	1039.6	8.20213	{18813@[b2+1, b2+1, b7+1];[y2+1, y5+1, y7+1];[M9+1, M9+2]}{18815@}{18816@}	{18813@[b2+1:254.14916, b2+1:286.12155, b7+1:807.42099];[y2+1:288.20248, y5+1:645.35756, y7+1:841.47594];[M9+1:1094.61917, M9+2:563.79798]}{18815@}{18816@}	{18813@[b2+1:-0.00075, b2+1:-0.00044, b7+1:-0.00370];[y2+1:-0.00053, y5+1:0.00094, y7+1:-0.00186];[M9+1:-0.00126, M9+2:-0.00383]}{18815@}{18816@}	{18813@[b2+1:-2.98, b2+1:-1.55, b7+1:-4.59];[y2+1:-1.86, y5+1:1.46, y7+1:-2.21];[M9+1:-1.15, M9+2:-3.41]}{18815@}{18816@}	{18813@[b2+1:11027, b2+1:11549, b7+1:7174];[y2+1:14273, y5+1:9655, y7+1:230747];[M9+1:19534, M9+2:27221]}{18815@}{18816@}	{18813@8}{18815@0}{18816@0}		19.374	158.004	17	2;2	4	5	39
NS1	ApoA1	116	117	NS1ApoA1116117	K	K	3	W:\Collaboration_Services\Raw_files_FPL\Fusion Lumos\2021\Zheng\20211204_ZS_WP_SV_ns1_xlms\2021-12-04-10-10-24\Task1-Calibrate\20211203_ZS_WP_SV_ns1_R3-calib.mzML	16582	16553	724.354	3	2170.04	Inter	K;K		ApoA1	117	DLEEVKQK	DLEEVKQK(6)	987.524	10.1211	{16582@[b2+1, b3+1, b4+1, b5+1];[y3+1, y5+1, y6+1, y6+1];[M8+2, M8+1]}{16588@}	{16582@[b2+1:229.11746, b3+1:358.16166, b4+1:487.20462, b5+1:586.27168];[y3+1:457.27672, y5+1:685.38809, y6+1:814.43096, y6+1:846.40815];[M8+2:521.77489, M8+1:1074.51381]}{16588@}	{16582@[b2+1:-0.00082, b3+1:0.00078, b4+1:0.00115, b5+1:-0.00020];[y3+1:-0.00018, y5+1:0.00018, y6+1:0.00045, y6+1:0.00557];[M8+2:0.00099, M8+1:0.00022]}{16588@}	{16582@[b2+1:-3.62, b3+1:2.19, b4+1:2.37, b5+1:-0.34];[y3+1:-0.39, y5+1:0.27, y6+1:0.55, y6+1:6.59];[M8+2:0.96, M8+1:0.21]}{16588@}	{16582@[b2+1:5227, b3+1:5243, b4+1:7683, b5+1:7522];[y3+1:6867, y5+1:13645, y6+1:21318, y6+1:5457];[M8+2:46238, M8+1:96310]}{16588@}	{16582@10}{16588@0}		NS1	116	YSWKAWGK	YSWKAWGK(4)	1024.51	8.18615	{16582@[b2+1, b5+1];[y3+1, y4+1, y6+1, y6+1];[M8+2, M8+2]}{16586@[y7+1]}{16587@}	{16582@[b2+1:251.10270, b5+1:690.32151];[y3+1:390.21404, y4+1:461.25128, y6+1:829.43510, y6+1:861.40893];[M8+2:540.26949, M8+2:556.25539]}{16586@[y7+1:916.46641]}{16587@}	{16582@[b2+1:0.00007, b5+1:-0.00307];[y3+1:0.00046, y4+1:0.00058, y6+1:-0.00043, y6+1:0.00132];[M8+2:0.00081, M8+2:0.00054]}{16586@[y7+1:-0.00115]}{16587@}	{16582@[b2+1:0.28, b5+1:-4.46];[y3+1:1.18, y4+1:1.27, y6+1:-0.52, y6+1:1.53];[M8+2:0.76, M8+2:0.49]}{16586@[y7+1:-1.26]}{16587@}	{16582@[b2+1:5182, b5+1:5770];[y3+1:4093, y4+1:14444, y6+1:15416, y6+1:16752];[M8+2:172932, M8+2:96638]}{16586@[y7+1:292]}{16587@}	{16582@8}{16586@1}{16587@0}		18.3073	158.004	7	2;2	4	4	1
NS1	ApoA1	116	205	NS1ApoA1116205	K	K	1	W:\Collaboration_Services\Raw_files_FPL\Fusion Lumos\2021\Zheng\20211204_ZS_WP_SV_ns1_xlms\2021-12-04-10-10-24\Task1-Calibrate\20211203_ZS_WP_SV_ns1_R1-calib.mzML	17650	17602	591.893	5	2954.43	Inter	K;K		ApoA1	205	LEALKEGGGSLAEYHAK	LEALKEGGGSLAEYHAK(5)	1771.91	16.1585	[b2+1, b3+1, b4+1, b5+1, b6+1];[y4+1, y5+1, y6+1, y7+1, y10+2, y11+2, y13+2, y15+2, y15+3];[M17+3, M17+3]	[b2+1:243.13433, b3+1:314.17121, b4+1:427.25416, b5+1:641.33506, b6+1:770.37556];[y4+1:518.27059, y5+1:647.31634, y6+1:718.34951, y7+1:831.43917, y10+2:516.75995, y11+2:545.27111, y13+2:716.83183, y15+2:792.90600, y15+3:539.59674];[M17+3:609.64844, M17+3:620.30578]	[b2+1:0.00039, b3+1:0.00016, b4+1:-0.00096, b5+1:0.00235, b6+1:0.00025];[y4+1:-0.00157, y5+1:0.00158, y6+1:-0.00236, y7+1:0.00324, y10+2:0.00173, y11+2:0.00259, y13+2:0.00384, y15+2:0.00307, y15+3:0.00194];[M17+3:0.00247, M17+3:0.00241]	[b2+1:1.63, b3+1:0.52, b4+1:-2.24, b5+1:3.67, b6+1:0.33];[y4+1:-3.04, y5+1:2.45, y6+1:-3.28, y7+1:3.90, y10+2:1.68, y11+2:2.38, y13+2:2.68, y15+2:1.94, y15+3:1.20];[M17+3:1.35, M17+3:1.30]	[b2+1:14880, b3+1:8824, b4+1:5723, b5+1:8539, b6+1:3612];[y4+1:5250, y5+1:10165, y6+1:10839, y7+1:6286, y10+2:10546, y11+2:40208, y13+2:21801, y15+2:22864, y15+3:7086];[M17+3:41794, M17+3:119252]	16		NS1	116	YSWKAWGK	YSWKAWGK(4)	1024.51	7.13809	{17650@[y3+1, y4+1, y6+1, y6+1, y7+1];[M8+2, M8+2]}{17652@[y2+1]}{17653@[y2+1]}	{17650@[y3+1:390.21401, y4+1:461.24971, y6+1:829.43538, y6+1:861.41152, y7+1:916.46969];[M8+2:540.26992, M8+2:556.25590]}{17652@[y2+1:204.13376]}{17653@[y2+1:204.13377]}	{17650@[y3+1:0.00043, y4+1:-0.00098, y6+1:-0.00015, y6+1:0.00391, y7+1:0.00213];[M8+2:0.00167, M8+2:0.00155]}{17652@[y2+1:-0.00050]}{17653@[y2+1:-0.00050]}	{17650@[y3+1:1.09, y4+1:-2.13, y6+1:-0.18, y6+1:4.55, y7+1:2.32];[M8+2:1.55, M8+2:1.40]}{17652@[y2+1:-2.48]}{17653@[y2+1:-2.45]}	{17650@[y3+1:5360, y4+1:8813, y6+1:9764, y6+1:5940, y7+1:3645];[M8+2:217010, M8+2:43737]}{17652@[y2+1:204]}{17653@[y2+1:47]}	{17650@7}{17652@1}{17653@1}		23.2966	158.007	4	2;2	4	2	1
NS1	ApoA1	120	261	NS1ApoA1120261	K	K	1	W:\Collaboration_Services\Raw_files_FPL\Fusion Lumos\2021\Zheng\20211204_ZS_WP_SV_ns1_xlms\2021-12-04-10-10-24\Task1-Calibrate\20211203_ZS_WP_SV_ns1_R1-calib.mzML	7801	7791	464.242	3	1389.71	Inter	K;K		ApoA1	261	KLNAQ	KLNAQ(1)	572.328	9.04497	{7801@[b2+1, b3+1, b3+1, b4+1, b4+1];[y2+1, y3+1];[M5+2, M5+2]}{7805@}	{7801@[b2+1:296.19676, b3+1:410.23977, b3+1:442.21243, b4+1:481.27711, b4+1:513.24932];[y2+1:218.11336, y3+1:332.15731];[M5+2:314.17673, M5+2:330.16296]}{7805@}	{7801@[b2+1:-0.00010, b3+1:-0.00002, b3+1:0.00056, b4+1:0.00020, b4+1:0.00033];[y2+1:-0.00018, y3+1:0.00085];[M5+2:0.00014, M5+2:0.00051]}{7805@}	{7801@[b2+1:-0.35, b3+1:-0.06, b3+1:1.28, b4+1:0.42, b4+1:0.65];[y2+1:-0.81, y3+1:2.57];[M5+2:0.23, M5+2:0.77]}{7805@}	{7801@[b2+1:6244, b3+1:28338, b3+1:14244, b4+1:47097, b4+1:22301];[y2+1:36358, y3+1:5360];[M5+2:57740, M5+2:17109]}{7805@}	{7801@9}{7805@0}		NS1	120	AWGKAK	AWGKAK(4)	659.375	7.0871	{7801@[b2+1];[y2+1, y4+1, y4+1, y5+1];[M6+2, M6+2]}{7802@}{7803@}{7804@}	{7801@[b2+1:258.12376];[y2+1:218.15024, y4+1:457.27680, y4+1:489.24938, y5+1:675.32989];[M6+2:357.70033, M6+2:373.68655]}{7802@}{7803@}{7804@}	{7801@[b2+1:0.00006];[y2+1:0.00032, y4+1:-0.00010, y4+1:0.00039, y5+1:0.00159];[M6+2:0.00005, M6+2:0.00041]}{7802@}{7803@}{7804@}	{7801@[b2+1:0.23];[y2+1:1.47, y4+1:-0.22, y4+1:0.80, y5+1:2.36];[M6+2:0.06, M6+2:0.55]}{7802@}{7803@}{7804@}	{7801@[b2+1:46304];[y2+1:6348, y4+1:48278, y4+1:10503, y5+1:16307];[M6+2:241240, M6+2:85741]}{7802@}{7803@}{7804@}	{7801@7}{7802@0}{7803@0}{7804@0}		16.1321	158.002	25	2;2	4	18	2
NS1	ApoA1	2	228	NS1ApoA12228	S	K	1	W:\Collaboration_Services\Raw_files_FPL\Fusion Lumos\2021\Zheng\20211204_ZS_WP_SV_ns1_xlms\2021-12-04-10-10-24\Task1-Calibrate\20211203_ZS_WP_SV_ns1_R1-calib.mzML	20455	20383	684.097	4	2732.36	Inter	S;K		NS1	2	DSGCVVSWK	DSGC[Common Fixed:Carbamidomethyl on C]VVSWK(2)	1036.46	9.08371	[y2+1, y3+1, y4+1, y5+1, y6+1, y7+1];[b5+1, b6+1];[M9+1]	[y2+1:333.19245, y3+1:420.22463, y4+1:519.29298, y5+1:618.36319, y6+1:778.38872, y7+1:835.40861];[b5+1:573.19586, b6+1:672.26674];[M9+1:1091.48393]	[y2+1:0.00033, y3+1:0.00048, y4+1:0.00042, y5+1:0.00222, y6+1:-0.00290, y7+1:-0.00448];[b5+1:-0.00148, b6+1:0.00100];[M9+1:0.00131]	[y2+1:1.01, y3+1:1.15, y4+1:0.81, y5+1:3.60, y6+1:-3.73, y7+1:-5.37];[b5+1:-2.58, b6+1:1.48];[M9+1:1.20]	[y2+1:5349, y3+1:27846, y4+1:16848, y5+1:8294, y6+1:5978, y7+1:7909];[b5+1:5929, b6+1:6514];[M9+1:22790]	9		ApoA1	228	ALGEKAKPVLEDLR	ALGEKAKPVLEDLR(5)	1537.88	4.10887	{20455@[y2+1, y7+1];[M14+3, M14+2]}{20457@[b12+1]}{20458@}{20459@}	{20455@[y2+1:288.20404, y7+1:841.47709];[M14+3:531.63800, M14+2:812.93935]}{20457@[b12+1:1337.66786]}{20458@}{20459@}	{20455@[y2+1:0.00102, y7+1:-0.00070];[M14+3:-0.00119, M14+2:-0.00129]}{20457@[b12+1:-0.00911]}{20458@}{20459@}	{20455@[y2+1:3.57, y7+1:-0.84];[M14+3:-0.75, M14+2:-0.79]}{20457@[b12+1:-6.81]}{20458@}{20459@}	{20455@[y2+1:7398, y7+1:13976];[M14+3:26045, M14+2:92336]}{20457@[b12+1:113]}{20458@}{20459@}	{20455@4}{20457@1}{20458@0}{20459@0}		13.1926	158.01	3	1;2	3	7	4
NS1	ApoA1	38	163	NS1ApoA138163	S	K	2	W:\Collaboration_Services\Raw_files_FPL\Fusion Lumos\2021\Zheng\20211204_ZS_WP_SV_ns1_xlms\2021-12-04-10-10-24\Task1-Calibrate\20211203_ZS_WP_SV_ns1_R2-calib.mzML	22929	22886	840.023	5	4195.08	Inter	S;K		NS1	38	FQPESPSKLASAIQK	FQPESPS[DSSO:DSSO_alkene_S on S]K[DSSO:DSSO_alkene_K on K]LASAIQK(5)	1737.89	6.02916	[b2+1, b4+1];[y4+1, y5+1, y6+1, y7+1]	[b2+1:276.13514, b4+1:502.23019];[y4+1:459.29429, y5+1:546.32545, y6+1:617.36176, y7+1:730.44682]	[b2+1:0.00087, b4+1:0.00056];[y4+1:0.00173, y5+1:0.00086, y6+1:0.00006, y7+1:0.00106]	[b2+1:3.17, b4+1:1.13];[y4+1:3.78, y5+1:1.58, y6+1:0.09, y7+1:1.45]	[b2+1:32774, b4+1:13192];[y4+1:12994, y5+1:55065, y6+1:79991, y7+1:33018]	6		ApoA1	163	QKVQELQDKLSPLAQELR	QK[DSSO:DSSO_hydro_K on K]VQ[Common Artifact:Deamidation on Q]ELQDKLSPLAQELR(9)	2299.17	3.0142	[y7+1, y8+1, y15+2]	[y7+1:826.47765, y8+1:913.50991, y15+2:911.97562]	[y7+1:-0.00048, y8+1:-0.00025, y15+2:-0.01055]	[y7+1:-0.58, y8+1:-0.27, y15+2:-5.79]	[y7+1:39415, y8+1:44450, y15+2:26701]	3		9.04337	158.01	40	0;0	0	-	-
NS1	ApoA1	40	129	NS1ApoA140129	S	K	2	W:\Collaboration_Services\Raw_files_FPL\Fusion Lumos\2021\Zheng\20211204_ZS_WP_SV_ns1_xlms\2021-12-04-10-10-24\Task1-Calibrate\20211203_ZS_WP_SV_ns1_R2-calib.mzML	21046	21009	796.408	4	3181.6	Inter	S;K		NS1	40	FQPESPSKLASAIQK	FQPESPSKLASAIQK(7)	1629.87	6.06562	{21046@[b2+1, b5+1];[y13+1, y13+2];[M15+2, M15+2]}{21049@[b2+1];[y11+1]}{21050@[b2+1]}{21051@[b2+1];[y10+1, y13+1]}{21052@[b2+1];[y11+1]}	{21046@[b2+1:276.13467, b5+1:589.26194];[y13+1:1409.76221, y13+2:721.37179];[M15+2:842.94976, M15+2:858.93560]}{21049@[b2+1:276.13366];[y11+1:1183.66803]}{21050@[b2+1:276.13367]}{21051@[b2+1:276.13367];[y10+1:1128.59998, y13+1:1441.73372]}{21052@[b2+1:276.13367];[y11+1:1183.66671]}	{21046@[b2+1:0.00041, b5+1:0.00029];[y13+1:-0.00126, y13+2:0.00076];[M15+2:0.00179, M15+2:0.00139]}{21049@[b2+1:-0.00061];[y11+1:-0.00008]}{21050@[b2+1:-0.00059]}{21051@[b2+1:-0.00059];[y10+1:-0.00818, y13+1:-0.00182]}{21052@[b2+1:-0.00059];[y11+1:-0.00140]}	{21046@[b2+1:1.47, b5+1:0.50];[y13+1:-0.89, y13+2:0.53];[M15+2:1.06, M15+2:0.81]}{21049@[b2+1:-2.22];[y11+1:-0.06]}{21050@[b2+1:-2.16]}{21051@[b2+1:-2.16];[y10+1:-7.25, y13+1:-1.27]}{21052@[b2+1:-2.16];[y11+1:-1.18]}	{21046@[b2+1:61185, b5+1:17916];[y13+1:42549, y13+2:148709];[M15+2:360873, M15+2:266926]}{21049@[b2+1:375];[y11+1:259]}{21050@[b2+1:302]}{21051@[b2+1:1532];[y10+1:113, y13+1:249]}{21052@[b2+1:380];[y11+1:366]}	{21046@6}{21049@2}{21050@1}{21051@3}{21052@2}		ApoA1	129	VQPYLDEFQKK	VQPYLDEFQKK(10)	1393.72	6.02961	[b2+1, b6+1];[y9+2, y9+2];[M11+2, M11+1]	[b2+1:228.13454, b6+1:716.36000];[y9+2:611.31167, y9+2:627.29771];[M11+2:724.87544, M11+1:1480.71322]	[b2+1:0.00027, b6+1:-0.00137];[y9+2:0.00106, y9+2:0.00105];[M11+2:0.00160, M11+1:-0.00086]	[b2+1:1.19, b6+1:-1.91];[y9+2:0.87, y9+2:0.84];[M11+2:1.10, M11+1:-0.58]	[b2+1:35227, b6+1:20197];[y9+2:106385, y9+2:106682];[M11+2:105340, M11+1:31431]	6		12.0952	158.008	50	2;2	4	3	12
NS1	ApoA1	69	141	NS1ApoA169141	K	K	3	W:\Collaboration_Services\Raw_files_FPL\Fusion Lumos\2021\Zheng\20211204_ZS_WP_SV_ns1_xlms\2021-12-04-10-10-24\Task1-Calibrate\20211203_ZS_WP_SV_ns1_R3-calib.mzML	31195	31193	1004.7	5	5018.45	Inter	K;K		NS1	69	LENLMWKQITPELNHILSENEVK	LENLMWKQIT[DSSO:DSSO_thiol_T on T]PELNHILSENEVK(7)	2863.42	7.046	[b5+1, b6+1, b7+1, b9+1, b9+1];[y7+1, y13+2]	[b5+1:601.29975, b6+1:787.37957, b7+1:969.48984, b9+1:1210.62807, b9+1:1242.60342];[y7+1:818.42443, y13+2:761.39899]	[b5+1:-0.00166, b6+1:-0.00116, b7+1:0.00359, b9+1:-0.00081, b9+1:0.00245];[y7+1:-0.00099, y13+2:-0.00005]	[b5+1:-2.76, b6+1:-1.47, b7+1:3.71, b9+1:-0.67, b9+1:1.98];[y7+1:-1.21, y13+2:-0.03]	[b5+1:386889, b6+1:393332, b7+1:2257202, b9+1:461859, b9+1:373620];[y7+1:177905, y13+2:1610098]	7		ApoA1	141	QKVAPLGEEFREGARQK	Q[Common Artifact:Deamidation on Q]KVAPLGEEFREGARQK[DSSO:DSSO_alkene_K on K](2)	1997.03	2.00521	[y3+1, y5+1]	[y3+1:485.28264, y5+1:613.33979]	[y3+1:-0.00045, y5+1:-0.00188]	[y3+1:-0.94, y5+1:-3.06]	[y3+1:356814, y5+1:284698]	2		9.05121	157.995	36	0;0	0	-	-
NS1	ApoA1	9	223	NS1ApoA19223	K	K	1	W:\Collaboration_Services\Raw_files_FPL\Fusion Lumos\2021\Zheng\20211204_ZS_WP_SV_ns1_xlms\2021-12-04-10-10-24\Task1-Calibrate\20211203_ZS_WP_SV_ns1_R1-calib.mzML	15578	15560	653.319	4	2609.25	Inter	K;K		NS1	9	DSGCVVSWKNK	DSGC[Common Fixed:Carbamidomethyl on C]VVSWKNK(9)	1278.6	18.103	{15578@[y2+1, y4+1, y5+1, y5+1, y6+1, y6+1, y7+1, y7+1, y9+1];[b4+1, b5+1, b6+1, b7+1, b8+1, b9+1, b10+1];[M11+2, M11+2]}{15582@[y9+1]}{15583@}	{15578@[y2+1:261.15579, y4+1:661.31330, y5+1:716.37345, y5+1:748.34557, y6+1:815.44078, y6+1:847.41192, y7+1:914.50935, y7+1:946.48113, y9+1:1163.53143];[b4+1:420.11842, b5+1:519.18768, b6+1:618.25509, b7+1:705.28823, b8+1:891.36515, b9+1:1105.44114, b10+1:1219.48219];[M11+2:667.31442, M11+2:683.30044]}{15582@[y9+1:1163.53486]}{15583@}	{15578@[y2+1:0.00006, y4+1:0.00065, y5+1:0.00085, y5+1:0.00089, y6+1:-0.00023, y6+1:-0.00117, y7+1:-0.00008, y7+1:-0.00037, y9+1:-0.00219];[b4+1:0.00006, b5+1:0.00091, b6+1:-0.00009, b7+1:0.00101, b8+1:-0.00138, b9+1:-0.00300, b10+1:-0.00487];[M11+2:0.00105, M11+2:0.00101]}{15582@[y9+1:0.00124]}{15583@}	{15578@[y2+1:0.24, y4+1:0.98, y5+1:1.19, y5+1:1.19, y6+1:-0.29, y6+1:-1.38, y7+1:-0.08, y7+1:-0.39, y9+1:-1.88];[b4+1:0.15, b5+1:1.75, b6+1:-0.15, b7+1:1.43, b8+1:-1.55, b9+1:-2.71, b10+1:-4.00];[M11+2:0.79, M11+2:0.74]}{15582@[y9+1:1.07]}{15583@}	{15578@[y2+1:9817, y4+1:11723, y5+1:25488, y5+1:58436, y6+1:17353, y6+1:37416, y7+1:7621, y7+1:16234, y9+1:6334];[b4+1:9633, b5+1:24066, b6+1:47543, b7+1:8691, b8+1:4468, b9+1:7116, b10+1:5582];[M11+2:47225, M11+2:83642]}{15582@[y9+1:113]}{15583@}	{15578@18}{15582@1}{15583@0}		ApoA1	223	ASEQLKALGEK	ASEQLKALGEK(6)	1172.64	13.1351	{15578@[y3+1, y4+1, y5+1, y6+1];[b5+1, b6+1, b6+1, b7+1, b8+1, b8+1, b10+1];[M11+2, M11+2]}{15580@}{15581@}	{15578@[y3+1:333.17732, y4+1:446.26137, y5+1:517.29842, y6+1:699.40339];[b5+1:529.26247, b6+1:711.36599, b6+1:743.33686, b7+1:782.40278, b8+1:895.48853, b8+1:927.46322, b10+1:1081.55219];[M11+2:614.33309, M11+2:630.31934]}{15580@}{15581@}	{15578@[y3+1:0.00046, y4+1:0.00045, y5+1:0.00038, y6+1:-0.00017];[b5+1:0.00081, b6+1:-0.00118, b6+1:-0.00239, b7+1:-0.00151, b8+1:0.00018, b8+1:0.00279, b10+1:-0.00023];[M11+2:0.00097, M11+2:0.00138]}{15580@}{15581@}	{15578@[y3+1:1.38, y4+1:1.00, y5+1:0.74, y6+1:-0.24];[b5+1:1.54, b6+1:-1.66, b6+1:-3.22, b7+1:-1.94, b8+1:0.20, b8+1:3.01, b10+1:-0.21];[M11+2:0.79, M11+2:1.10]}{15580@}{15581@}	{15578@[y3+1:31221, y4+1:14331, y5+1:27223, y6+1:12802];[b5+1:12415, b6+1:6943, b6+1:4549, b7+1:5401, b8+1:11529, b8+1:4736, b10+1:5995];[M11+2:320527, M11+2:104090]}{15580@}{15581@}	{15578@13}{15580@0}{15581@0}		31.2381	158.003	35	2;2	4	7	2
NS1	ApoA1	9	261	NS1ApoA19261	K	K	1	W:\Collaboration_Services\Raw_files_FPL\Fusion Lumos\2021\Zheng\20211204_ZS_WP_SV_ns1_xlms\2021-12-04-10-10-24\Task1-Calibrate\20211203_ZS_WP_SV_ns1_R1-calib.mzML	13930	13918	670.653	3	2008.94	Inter	K;K		NS1	9	DSGCVVSWKNK	DSGC[Common Fixed:Carbamidomethyl on C]VVSWKNK(9)	1278.6	19.184	{13930@[y2+1, y3+1, y4+1, y5+1, y5+1, y6+1, y6+1, y7+1, y7+1, y9+1];[b4+1, b5+1, b6+1, b7+1, b8+1, b9+1, b9+1];[M11+1, M11+2]}{13935@}{13936@}	{13930@[y2+1:261.15673, y3+1:443.26214, y4+1:629.34387, y5+1:716.37413, y5+1:748.34681, y6+1:815.44254, y6+1:847.41263, y7+1:914.51093, y7+1:946.48299, y9+1:1131.55752];[b4+1:420.12025, b5+1:519.18860, b6+1:618.25666, b7+1:705.28850, b8+1:891.36864, b9+1:1073.47264, b9+1:1105.44605];[M11+1:1333.62209, M11+2:683.30139]}{13935@}{13936@}	{13930@[y2+1:0.00100, y3+1:0.00088, y4+1:0.00330, y5+1:0.00154, y5+1:0.00214, y6+1:0.00153, y6+1:-0.00045, y7+1:0.00150, y7+1:0.00149, y9+1:-0.00402];[b4+1:0.00189, b5+1:0.00183, b6+1:0.00147, b7+1:0.00128, b8+1:0.00211, b9+1:0.00059, b9+1:0.00192];[M11+1:0.00158, M11+2:0.00292]}{13935@}{13936@}	{13930@[y2+1:3.84, y3+1:2.00, y4+1:5.25, y5+1:2.15, y5+1:2.86, y6+1:1.88, y6+1:-0.54, y7+1:1.65, y7+1:1.58, y9+1:-3.55];[b4+1:4.50, b5+1:3.53, b6+1:2.38, b7+1:1.82, b8+1:2.37, b9+1:0.55, b9+1:1.74];[M11+1:1.18, M11+2:2.14]}{13935@}{13936@}	{13930@[y2+1:10721, y3+1:14369, y4+1:17181, y5+1:77891, y5+1:29426, y6+1:52866, y6+1:27207, y7+1:15730, y7+1:9763, y9+1:4602];[b4+1:20827, b5+1:57912, b6+1:95991, b7+1:14590, b8+1:10737, b9+1:11870, b9+1:4851];[M11+1:14791, M11+2:52549]}{13935@}{13936@}	{13930@19}{13935@0}{13936@0}		ApoA1	261	KLNAQ	KLNAQ(1)	572.328	8.13561	[y2+1, y3+1];[b3+1, b3+1, b4+1, b4+1];[M5+1, M5+1]	[y2+1:218.11404, y3+1:332.15727];[b3+1:410.24130, b3+1:442.21242, b4+1:481.27789, b4+1:513.25132];[M5+1:627.34790, M5+1:659.31854]	[y2+1:0.00051, y3+1:0.00081];[b3+1:0.00151, b3+1:0.00055, b4+1:0.00098, b4+1:0.00234];[M5+1:0.00186, M5+1:0.00042]	[y2+1:2.33, y3+1:2.43];[b3+1:3.69, b3+1:1.25, b4+1:2.04, b4+1:4.56];[M5+1:2.96, M5+1:0.63]	[y2+1:5626, y3+1:4440];[b3+1:7451, b3+1:5684, b4+1:17370, b4+1:20837];[M5+1:127006, M5+1:212488]	8		27.3196	158.005	21	2;2	4	8	2
NS1	ApoA1	94	210	NS1ApoA194210	K	S	3	W:\Collaboration_Services\Raw_files_FPL\Fusion Lumos\2021\Zheng\20211204_ZS_WP_SV_ns1_xlms\2021-12-04-10-10-24\Task1-Calibrate\20211203_ZS_WP_SV_ns1_R3-calib.mzML	25953	25907	944.452	5	4717.22	Inter	K;S		NS1	94	MTIMTGDIKGIMQAGK	MTIM[Common Variable:Oxidation on M]TGDIKGIMQAGK(9)	1709.85	23.2724	{25953@[y3+1, y4+1, y5+1, y7+1, y8+1, y8+1, y11+1, y11+1, y12+1, y12+1, y13+2];[b4+1, b5+1, b7+1, b8+1, b9+1, b11+1, b11+1, b12+1, b13+1, b14+1];[M16+2, M16+2]}{25955@[y2+1, y5+1, y12+1]}{25956@[y2+1, y13+1]}	{25953@[y3+1:275.17234, y4+1:403.23042, y5+1:534.27052, y7+1:704.37649, y8+1:886.47988, y8+1:918.45002, y11+1:1171.60725, y11+1:1203.59225, y12+1:1272.66171, y12+1:1304.63365, y13+2:710.35378];[b4+1:493.21453, b5+1:594.26273, b7+1:766.31085, b8+1:879.39479, b9+1:1061.49953, b11+1:1231.60407, b11+1:1263.58059, b12+1:1362.65214, b13+1:1490.70432, b14+1:1561.74077];[M16+2:882.93739, M16+2:898.92331]…	{25953@[y3+1:0.00096, y4+1:0.00046, y5+1:0.00007, y7+1:0.00052, y8+1:-0.00162, y8+1:-0.00356, y11+1:-0.00672, y11+1:0.00620, y12+1:0.00006, y12+1:-0.00008, y13+2:0.00325];[b4+1:-0.00037, b5+1:0.00015, b7+1:-0.00014, b8+1:-0.00026, b9+1:-0.00105, b11+1:-0.00204, b11+1:0.00240, b12+1:0.00555, b13+1:-0.00084, b14+1:-0.00151];[M16+2:-0.00177, M16+2:-0.00201]}{25955@[y2+1:-0.00084, y5+1:-0.00354, y12+…	{25953@[y3+1:3.50, y4+1:1.14, y5+1:0.14, y7+1:0.74, y8+1:-1.83, y8+1:-3.88, y11+1:-5.74, y11+1:5.16, y12+1:0.05, y12+1:-0.06, y13+2:2.29];[b4+1:-0.76, b5+1:0.26, b7+1:-0.18, b8+1:-0.30, b9+1:-0.99, b11+1:-1.65, b11+1:1.90, b12+1:4.08, b13+1:-0.57, b14+1:-0.97];[M16+2:-1.00, M16+2:-1.12]}{25955@[y2+1:-4.14, y5+1:-6.65, y12+1:3.25]}{25956@[y2+1:-4.14, y13+1:-2.24]}	{25953@[y3+1:10092, y4+1:15229, y5+1:73641, y7+1:88916, y8+1:16751, y8+1:16937, y11+1:10679, y11+1:9993, y12+1:10407, y12+1:9990, y13+2:12306];[b4+1:10971, b5+1:12127, b7+1:8857, b8+1:19586, b9+1:24024, b11+1:21598, b11+1:9050, b12+1:12416, b13+1:11910, b14+1:19032];[M16+2:554508, M16+2:489779]}{25955@[y2+1:687, y5+1:671, y12+1:1314]}{25956@[y2+1:504, y13+1:204]}	{25953@23}{25955@3}{25956@2}		ApoA1	210	QRLTARLEALKEGGGSLAEYHAK	QRLT[DSSO:DSSO_hydro_T on T]ARLEALK[DSSO:DSSO_hydro_K on K]EGGGSLAEYHAK(16)	2849.37	2.00837	[b9+1, b15+2]	[b9+1:1215.60723, b15+2:966.96180]	[b9+1:-0.00777, b15+2:0.00102]	[b9+1:-6.40, b15+2:0.53]	[b9+1:14413, b15+2:30719]	2		25.2808	158.004	28	2;0	2	3	-
NS1	NS1	101	113	NS1NS1101113	K	Y	3	W:\Collaboration_Services\Raw_files_FPL\Fusion Lumos\2021\Zheng\20211204_ZS_WP_SV_ns1_xlms\2021-12-04-10-10-24\Task1-Calibrate\20211203_ZS_WP_SV_ns1_R3-calib.mzML	14451	14427	511.504	4	2041.99	Intra	K;Y		NS1	101	GIMQAGKR	GIMQAGKR(7)	859.47	10.0966	{14451@[b3+1, b4+1, b5+1];[y3+1, y4+1, y5+1, y6+1, y6+2];[M8+2, M8+2]}{14456@}{14457@}	{14451@[b3+1:302.15334, b4+1:430.21322, b5+1:501.24916];[y3+1:414.24518, y4+1:517.25525, y5+1:645.31089, y6+1:744.38278, y6+2:388.68085];[M8+2:457.74728, M8+2:473.73366]}{14456@}{14457@}	{14451@[b3+1:0.00005, b4+1:0.00135, b5+1:0.00018];[y3+1:-0.00076, y4+1:0.00012, y5+1:-0.00282, y6+1:0.00067, y6+2:0.00023];[M8+2:-0.00037, M8+2:0.00032]}{14456@}{14457@}	{14451@[b3+1:0.18, b4+1:3.15, b5+1:0.36];[y3+1:-1.83, y4+1:0.23, y5+1:-4.38, y6+1:0.90, y6+2:0.30];[M8+2:-0.40, M8+2:0.33]}{14456@}{14457@}	{14451@[b3+1:30271, b4+1:33287, b5+1:32760];[y3+1:36611, y4+1:45318, y5+1:32914, y6+1:76022, y6+2:137696];[M8+2:196991, M8+2:683043]}{14456@}{14457@}	{14451@10}{14456@0}{14457@0}		NS1	113	YSWKAWGK	YSWKAWGK(1)	1024.51	4.11232	{14451@[y3+1, y4+1];[M8+2, M8+2]}{14454@[y2+1]}{14455@[y2+1]}	{14451@[y3+1:390.21418, y4+1:461.24872];[M8+2:540.26937, M8+2:556.25515]}{14454@[y2+1:204.13357]}{14455@[y2+1:204.13358]}	{14451@[y3+1:0.00060, y4+1:-0.00198];[M8+2:0.00057, M8+2:0.00006]}{14454@[y2+1:-0.00070]}{14455@[y2+1:-0.00069]}	{14451@[y3+1:1.53, y4+1:-4.30];[M8+2:0.53, M8+2:0.05]}{14454@[y2+1:-3.44]}{14455@[y2+1:-3.39]}	{14451@[y3+1:26722, y4+1:35785];[M8+2:1174542, M8+2:279539]}{14454@[y2+1:1051]}{14455@[y2+1:51]}	{14451@4}{14454@1}{14455@1}		14.209	158.002	17	2;2	4	3	2
NS1	NS1	101	116	NS1NS1101116	K	K	3	W:\Collaboration_Services\Raw_files_FPL\Fusion Lumos\2021\Zheng\20211204_ZS_WP_SV_ns1_xlms\2021-12-04-10-10-24\Task1-Calibrate\20211203_ZS_WP_SV_ns1_R3-calib.mzML	18797	18759	674.538	5	3367.65	Intra	K;K		NS1	116	SLRPQPTELKYSWKAWGK	SLRPQPT[DSSO:DSSO_hydro_T on T]ELKYSWKAWGK(14)	2350.18	11.0486	[y2+1, y3+1, y4+1, y5+1, y8+1, y8+1];[b3+1, b5+1, b10+2];[M18+3, M18+3]	[y2+1:204.13367, y3+1:390.21143, y4+1:461.24916, y5+1:643.35195, y8+1:1079.52980, y8+1:1111.49797];[b3+1:357.22360, b5+1:582.33247, b10+2:663.83644];[M18+3:802.39914, M18+3:813.05625]	[y2+1:-0.00060, y3+1:-0.00215, y4+1:-0.00153, y5+1:-0.00427, y8+1:-0.00109, y8+1:-0.00500];[b3+1:-0.00088, b5+1:-0.00335, b10+2:-0.00658];[M18+3:-0.01292, M18+3:-0.01368]	[y2+1:-2.93, y3+1:-5.53, y4+1:-3.33, y5+1:-6.64, y8+1:-1.01, y8+1:-4.50];[b3+1:-2.46, b5+1:-5.77, b10+2:-4.96];[M18+3:-5.38, M18+3:-5.61]	[y2+1:13208, y3+1:24423, y4+1:20776, y5+1:6479, y8+1:15986, y8+1:12873];[b3+1:7046, b5+1:24210, b10+2:12702];[M18+3:31823, M18+3:34568]	11		NS1	101	GIMQAGKR	GIMQAGKR(7)	859.47	9.07799	{18797@[b3+1, b4+1, b5+1];[y3+1, y3+1, y4+1, y6+1];[M8+2, M8+2]}{18802@}{18803@}	{18797@[b3+1:302.15262, b4+1:430.20957, b5+1:501.24690];[y3+1:414.24328, y3+1:446.21545, y4+1:485.28225, y6+1:744.37980];[M8+2:457.74608, M8+2:473.73106]}{18802@}{18803@}	{18797@[b3+1:-0.00067, b4+1:-0.00229, b5+1:-0.00208];[y3+1:-0.00266, y3+1:-0.00257, y4+1:-0.00080, y6+1:-0.00231];[M8+2:-0.00275, M8+2:-0.00488]}{18802@}{18803@}	{18797@[b3+1:-2.21, b4+1:-5.34, b5+1:-4.16];[y3+1:-6.43, y3+1:-5.77, y4+1:-1.65, y6+1:-3.11];[M8+2:-3.01, M8+2:-5.16]}{18802@}{18803@}	{18797@[b3+1:14553, b4+1:8437, b5+1:21619];[y3+1:12784, y3+1:8504, y4+1:18630, y6+1:19110];[M8+2:177335, M8+2:46461]}{18802@}{18803@}	{18797@9}{18802@0}{18803@0}		20.1266	158.006	55	2;2	4	6	19
NS1	NS1	11	116	NS1NS111116	K	K	1	W:\Collaboration_Services\Raw_files_FPL\Fusion Lumos\2021\Zheng\20211204_ZS_WP_SV_ns1_xlms\2021-12-04-10-10-24\Task1-Calibrate\20211203_ZS_WP_SV_ns1_R1-calib.mzML	13411	13390	454.229	4	1812.89	Intra	K;K		NS1	116	YSWKAWGK	YSWKAWGK(4)	1024.51	9.12222	[b2+1, b6+1];[y2+1, y3+1, y4+1, y6+1, y7+1];[M8+2, M8+2]	[b2+1:251.10253, b6+1:908.38009];[y2+1:204.13424, y3+1:390.21325, y4+1:461.25154, y6+1:861.40691, y7+1:948.43677];[M8+2:540.26917, M8+2:556.25471]	[b2+1:-0.00011, b6+1:0.00411];[y2+1:-0.00003, y3+1:-0.00033, y4+1:0.00085, y6+1:-0.00071, y7+1:-0.00287];[M8+2:0.00018, M8+2:-0.00083]	[b2+1:-0.43, b6+1:4.53];[y2+1:-0.14, y3+1:-0.84, y4+1:1.85, y6+1:-0.82, y7+1:-3.02];[M8+2:0.16, M8+2:-0.75]	[b2+1:6257, b6+1:4108];[y2+1:3069, y3+1:6246, y4+1:10143, y6+1:12333, y7+1:6691];[M8+2:10758, M8+2:131984]	9		NS1	11	NKELK	NKELK(2)	630.37	6.15908	[b2+1, b3+1];[y2+1, y3+1];[M5+2, M5+2]	[b2+1:297.15620, b3+1:426.19822];[y2+1:260.19671, y3+1:389.24023];[M5+2:343.19767, M5+2:359.18372]	[b2+1:0.00047, b3+1:-0.00010];[y2+1:-0.00015, y3+1:0.00077];[M5+2:0.00014, M5+2:0.00018]	[b2+1:1.60, b3+1:-0.24];[y2+1:-0.59, y3+1:1.98];[M5+2:0.21, M5+2:0.24]	[b2+1:3046, b3+1:19388];[y2+1:6061, y3+1:6374];[M5+2:201436, M5+2:13064]	6		15.2813	158.002	8	2;2	4	18	1
NS1	NS1	112	122	NS1NS1112122	K	K	2	W:\Collaboration_Services\Raw_files_FPL\Fusion Lumos\2021\Zheng\20211204_ZS_WP_SV_ns1_xlms\2021-12-04-10-10-24\Task1-Calibrate\20211203_ZS_WP_SV_ns1_R2-calib.mzML	14276	14224	510.869	5	2549.31	Intra	K;K		NS1	112	SLRPQPTELKYSWK	SLRPQPTELKYSWK(10)	1731.93	21.1017	[y2+1, y3+1, y4+1, y5+1, y6+1, y6+1, y7+1, y7+1, y9+2, y9+2, y12+2];[b3+1, b5+2, b7+2, b8+1, b9+1, b10+3, b12+2, b13+2];[M14+4, M14+3]	[y2+1:333.19252, y3+1:420.22443, y4+1:583.28785, y5+1:797.36474, y6+1:878.47682, y6+1:910.45387, y7+1:1007.51774, y7+1:1039.49091, y9+2:603.31570, y9+2:619.30003, y12+2:809.90492];[b3+1:357.22505, b5+2:291.67189, b7+2:390.72203, b8+1:909.47878, b9+1:1022.56108, b10+3:402.22734, b12+2:727.88449, b13+2:836.91066];[M14+4:447.49266, M14+3:606.97865]	[y2+1:0.00040, y3+1:0.00028, y4+1:0.00037, y5+1:-0.00034, y6+1:-0.00025, y6+1:0.00473, y7+1:-0.00192, y7+1:-0.00082, y9+2:0.00402, y9+2:0.00061, y12+2:-0.00206];[b3+1:0.00057, b5+2:0.00067, b7+2:0.00051, b8+1:-0.00008, b9+1:-0.00184, b10+3:-0.00099, b12+2:-0.00210, b13+2:-0.00115];[M14+4:0.00017, M14+3:0.00067]	[y2+1:1.20, y3+1:0.67, y4+1:0.64, y5+1:-0.43, y6+1:-0.28, y6+1:5.20, y7+1:-1.90, y7+1:-0.79, y9+2:3.34, y9+2:0.49, y12+2:-1.27];[b3+1:1.61, b5+2:1.16, b7+2:0.66, b8+1:-0.09, b9+1:-1.81, b10+3:-0.82, b12+2:-1.44, b13+2:-0.69];[M14+4:0.09, M14+3:0.37]	[y2+1:182025, y3+1:669356, y4+1:727330, y5+1:538406, y6+1:88416, y6+1:440538, y7+1:121652, y7+1:294034, y9+2:474450, y9+2:400482, y12+2:188655];[b3+1:273273, b5+2:635482, b7+2:786616, b8+1:188436, b9+1:101635, b10+3:179029, b12+2:108135, b13+2:311118];[M14+4:320533, M14+3:2932889]	21		NS1	122	AWGKAK	AWGKAK(6)	659.375	8.13622	{14276@[b2+1, b4+1];[y4+1, y4+1, y5+1, y5+1];[M6+2, M6+2]}{14280@}{14281@}	{14276@[b2+1:258.12394, b4+1:443.24048];[y4+1:457.27717, y4+1:489.24950, y5+1:643.35518, y5+1:675.32833];[M6+2:357.70050, M6+2:373.68661]}{14280@}{14281@}	{14276@[b2+1:0.00024, b4+1:0.00035];[y4+1:0.00027, y4+1:0.00052, y5+1:-0.00104, y5+1:0.00004];[M6+2:0.00040, M6+2:0.00054]}{14280@}{14281@}	{14276@[b2+1:0.93, b4+1:0.80];[y4+1:0.59, y4+1:1.06, y5+1:-1.61, y5+1:0.05];[M6+2:0.55, M6+2:0.72]}{14280@}{14281@}	{14276@[b2+1:1874911, b4+1:165955];[y4+1:3514190, y4+1:1212790, y5+1:131517, y5+1:137460];[M6+2:5530164, M6+2:781277]}{14280@}{14281@}	{14276@8}{14280@0}{14281@0}		29.2379	158.003	17	2;2	4	2	3
NS1	NS1	116	120	NS1NS1116120	K	K	1	W:\Collaboration_Services\Raw_files_FPL\Fusion Lumos\2021\Zheng\20211204_ZS_WP_SV_ns1_xlms\2021-12-04-10-10-24\Task1-Calibrate\20211203_ZS_WP_SV_ns1_R1-calib.mzML	14811	14779	461.48	4	1841.89	Intra	K;K		NS1	116	YSWKAWGK	YSWKAWGK(4)	1024.51	9.15085	{14811@[b2+1, b4+1];[y2+1, y3+1, y5+1, y6+2, y6+1];[M8+2, M8+2]}{14815@[y2+1]}{14816@[y2+1, y7+1]}	{14811@[b2+1:251.10256, b4+1:619.28684];[y2+1:204.13428, y3+1:390.21427, y5+1:675.32592, y6+2:415.22160, y6+1:861.40537];[M8+2:540.26943, M8+2:556.25552]}{14815@[y2+1:204.13341]}{14816@[y2+1:204.13340, y7+1:916.46550]}	{14811@[b2+1:-0.00007, b4+1:-0.00063];[y2+1:0.00002, y3+1:0.00069, y5+1:-0.00238, y6+2:0.00039, y6+1:-0.00224];[M8+2:0.00069, M8+2:0.00079]}{14815@[y2+1:-0.00086]}{14816@[y2+1:-0.00087, y7+1:-0.00206]}	{14811@[b2+1:-0.30, b4+1:-1.01];[y2+1:0.08, y3+1:1.78, y5+1:-3.53, y6+2:0.47, y6+1:-2.61];[M8+2:0.64, M8+2:0.71]}{14815@[y2+1:-4.24]}{14816@[y2+1:-4.27, y7+1:-2.25]}	{14811@[b2+1:9426, b4+1:7821];[y2+1:10824, y3+1:11155, y5+1:4830, y6+2:6788, y6+1:8833];[M8+2:51657, M8+2:113785]}{14815@[y2+1:76]}{14816@[y2+1:30, y7+1:101]}	{14811@9}{14815@1}{14816@2}		NS1	120	AWGKAK	AWGKAK(4)	659.375	6.13863	{14811@[b2+1];[y2+1, y4+1, y4+1];[M6+2, M6+2]}{14813@}{14814@}	{14811@[b2+1:258.12397];[y2+1:218.14976, y4+1:457.27743, y4+1:489.24810];[M6+2:357.70044, M6+2:373.68686]}{14813@}{14814@}	{14811@[b2+1:0.00027];[y2+1:-0.00016, y4+1:0.00053, y4+1:-0.00088];[M6+2:0.00027, M6+2:0.00104]}{14813@}{14814@}	{14811@[b2+1:1.03];[y2+1:-0.72, y4+1:1.16, y4+1:-1.81];[M6+2:0.38, M6+2:1.40]}{14813@}{14814@}	{14811@[b2+1:29692];[y2+1:2933, y4+1:21671, y4+1:12615];[M6+2:119222, M6+2:20752]}{14813@}{14814@}	{14811@6}{14813@0}{14814@0}		15.2895	158.003	50	2;2	4	1	2
NS1	NS1	14	189	NS1NS114189	K	K	2	W:\Collaboration_Services\Raw_files_FPL\Fusion Lumos\2021\Zheng\20211204_ZS_WP_SV_ns1_xlms\2021-12-04-10-10-24\Task1-Calibrate\20211203_ZS_WP_SV_ns1_R2-calib.mzML	21493	21470	781.177	5	3900.85	Intra	K;K		NS1	14	ELKCGSGIFITDNVHTWTEQYK	ELKC[Common Fixed:Carbamidomethyl on C]GSGIFITDNVHTWTEQYK(3)	2625.25	13.1226	{21493@[y7+1, y11+2, y12+2, y13+2, y14+3, y16+2, y17+2, y18+2, y19+2, y20+3];[M22+3, M22+3];[b8+1]}{21497@}{21498@}	{21493@[y7+1:955.45779, y11+2:710.82928, y12+2:761.35228, y13+2:817.89346, y14+3:594.62138, y16+2:976.48270, y17+2:1019.99576, y18+2:1048.50939, y19+2:1128.52381, y20+3:824.04425];[M22+3:894.09587, M22+3:904.75336];[b8+1:931.40266]}{21497@}{21498@}	{21493@[y7+1:0.00582, y11+2:0.00211, y12+2:0.00043, y13+2:-0.00126, y14+3:0.00027, y16+2:0.00327, y17+2:-0.00264, y18+2:0.00316, y19+2:0.00135, y20+3:0.00159];[M22+3:0.00188, M22+3:0.00229];[b8+1:0.00145]}{21497@}{21498@}	{21493@[y7+1:6.10, y11+2:1.48, y12+2:0.28, y13+2:-0.77, y14+3:0.15, y16+2:1.67, y17+2:-1.30, y18+2:1.51, y19+2:0.60, y20+3:0.64];[M22+3:0.70, M22+3:0.84];[b8+1:1.56]}{21497@}{21498@}	{21493@[y7+1:19586, y11+2:33937, y12+2:191854, y13+2:109245, y14+3:22040, y16+2:111595, y17+2:55829, y18+2:144767, y19+2:263071, y20+3:61241];[M22+3:147561, M22+3:264136];[b8+1:27650]}{21497@}{21498@}	{21493@13}{21497@0}{21498@0}		NS1	189	LMSAAIKDNR	LMSAAIKDNR(7)	1117.59	10.0704	{21493@[y2+1, y3+1, y4+1, y5+1, y6+1, y8+1, y8+1];[b5+1];[M10+2, M10+2]}{21495@[b2+1, b4+1];[y9+1]}{21496@[b2+1]}	{21493@[y2+1:289.16195, y3+1:404.18905, y4+1:586.29480, y5+1:699.37795, y6+1:770.41774, y8+1:928.48451, y8+1:960.45725];[b5+1:474.23906];[M10+2:586.80797, M10+2:602.79463]}{21495@[b2+1:245.13352, b4+1:403.20031];[y9+1:1059.53272]}{21496@[b2+1:245.13352]}	{21493@[y2+1:0.00008, y3+1:0.00022, y4+1:0.00046, y5+1:-0.00046, y6+1:0.00222, y8+1:-0.00016, y8+1:0.00050];[b5+1:0.00097];[M10+2:-0.00055, M10+2:0.00069]}{21495@[b2+1:0.00169, b4+1:-0.00066];[y9+1:0.00757]}{21496@[b2+1:0.00169]}	{21493@[y2+1:0.26, y3+1:0.56, y4+1:0.78, y5+1:-0.65, y6+1:2.88, y8+1:-0.17, y8+1:0.52];[b5+1:2.06];[M10+2:-0.47, M10+2:0.57]}{21495@[b2+1:6.94, b4+1:-1.63];[y9+1:7.15]}{21496@[b2+1:6.94]}	{21493@[y2+1:22039, y3+1:41130, y4+1:62393, y5+1:33549, y6+1:37009, y8+1:138812, y8+1:33945];[b5+1:23307];[M10+2:341299, M10+2:100186]}{21495@[b2+1:242, b4+1:70];[y9+1:521]}{21496@[b2+1:152]}	{21493@10}{21495@3}{21496@1}		23.193	158.003	23	2;2	4	1	15
NS1	NS1	317	317	NS1NS1317317	T	T	1	W:\Collaboration_Services\Raw_files_FPL\Fusion Lumos\2021\Zheng\20211204_ZS_WP_SV_ns1_xlms\2021-12-04-10-10-24\Task1-Calibrate\20211203_ZS_WP_SV_ns1_R1-calib.mzML	29909	29873	1073.82	6	6436.9	Intra	T;T		NS1	317	SCTLPPLRYRGEDGCWYGMEIRPLK	S[DSSO:DSSO_thiol_S on S]C[Common Fixed:Carbamidomethyl on C]TLPPLRYRGEDGC[Common Fixed:Carbamidomethyl on C]WYGMEIRPLK(3)	3139.45	5.03399	[y5+1, y6+1, y7+1, y8+1, y9+1]	[y5+1:626.43316, y6+1:755.47951, y7+1:886.51194, y8+1:943.53817, y9+1:1106.59696]	[y5+1:-0.00165, y6+1:0.00211, y7+1:-0.00595, y8+1:-0.00118, y9+1:-0.00572]	[y5+1:-2.63, y6+1:2.79, y7+1:-6.71, y8+1:-1.25, y9+1:-5.18]	[y5+1:6599, y6+1:6052, y7+1:8783, y8+1:39949, y9+1:23339]	5		NS1	317	SCTLPPLRYRGEDGCWYGMEIRPLK	S[DSSO:DSSO_thiol_S on S]C[Common Fixed:Carbamidomethyl on C]TLPPLRYRGEDGC[Common Fixed:Carbamidomethyl on C]WYGMEIRPLK(3)	3139.45	5.03399	[y5+1, y6+1, y7+1, y8+1, y9+1]	[y5+1:626.43316, y6+1:755.47951, y7+1:886.51194, y8+1:943.53817, y9+1:1106.59696]	[y5+1:-0.00165, y6+1:0.00211, y7+1:-0.00595, y8+1:-0.00118, y9+1:-0.00572]	[y5+1:-2.63, y6+1:2.79, y7+1:-6.71, y8+1:-1.25, y9+1:-5.18]	[y5+1:6599, y6+1:6052, y7+1:8783, y8+1:39949, y9+1:23339]	5		10.068	158.001	21	0;0	0	-	-
NS1	NS1	40	109	NS1NS140109	T	S	3	W:\Collaboration_Services\Raw_files_FPL\Fusion Lumos\2021\Zheng\20211204_ZS_WP_SV_ns1_xlms\2021-12-04-10-10-24\Task1-Calibrate\20211203_ZS_WP_SV_ns1_R3-calib.mzML	21938	21913	828.619	5	4138.06	Intra	T;S		NS1	109	SLRPQPTELKYSWKAWGK	SLRPQPTELKYSWK[DSSO:DSSO_hydro_K on K]AWGK(7)	2350.18	13.0553	[y3+1, y4+1, y5+1, y6+1, y7+1, y8+1];[b5+1, b10+2, b11+2, b12+2, b16+2];[M18+3, M18+2]	[y3+1:390.21393, y4+1:461.25104, y5+1:765.36108, y6+1:951.43517, y7+1:1038.47245, y8+1:1201.53458];[b5+1:582.33329, b10+2:602.83879, b11+2:684.36995, b12+2:727.88628, b16+2:1101.53821];[M18+3:802.40395, M18+2:1219.09179]	[y3+1:0.00035, y4+1:0.00035, y5+1:0.00112, y6+1:-0.00411, y7+1:0.00115, y8+1:-0.00005];[b5+1:-0.00253, b10+2:0.00187, b11+2:0.00086, b12+2:0.00149, b16+2:0.00033];[M18+3:0.00149, M18+2:0.00843]	[y3+1:0.91, y4+1:0.75, y5+1:1.46, y6+1:-4.32, y7+1:1.11, y8+1:-0.04];[b5+1:-4.36, b10+2:1.55, b11+2:0.63, b12+2:1.03, b16+2:0.15];[M18+3:0.62, M18+2:3.46]	[y3+1:636779, y4+1:878559, y5+1:187894, y6+1:229327, y7+1:335842, y8+1:261558];[b5+1:234399, b10+2:560180, b11+2:622167, b12+2:318282, b16+2:415342];[M18+3:1409369, M18+2:565507]	13		NS1	40	FQPESPSKLASAIQK	FQPESPSKLASAIQK(7)	1629.87	10.1261	{21938@[b2+1];[y5+1, y6+1, y7+1, y10+1, y11+1, y13+2, y13+2];[M15+2, M15+2]}{21940@[y13+1]}{21941@[b2+1]}	{21938@[b2+1:276.13437];[y5+1:546.32576, y6+1:617.36191, y7+1:730.44605, y10+1:1128.61013, y11+1:1215.64162, y13+2:705.38601, y13+2:721.37243];[M15+2:842.95012, M15+2:858.93610]}{21940@[y13+1:1441.73260]}{21941@[b2+1:276.13373]}	{21938@[b2+1:0.00010];[y5+1:0.00117, y6+1:0.00021, y7+1:0.00028, y10+1:0.00197, y11+1:0.00143, y13+2:0.00129, y13+2:0.00203];[M15+2:0.00250, M15+2:0.00238]}{21940@[y13+1:-0.00294]}{21941@[b2+1:-0.00054]}	{21938@[b2+1:0.35];[y5+1:2.15, y6+1:0.34, y7+1:0.39, y10+1:1.74, y11+1:1.18, y13+2:0.91, y13+2:1.41];[M15+2:1.49, M15+2:1.39]}{21940@[y13+1:-2.04]}{21941@[b2+1:-1.96]}	{21938@[b2+1:586079];[y5+1:985479, y6+1:982536, y7+1:430884, y10+1:258370, y11+1:212748, y13+2:1496517, y13+2:2543888];[M15+2:946486, M15+2:6740915]}{21940@[y13+1:8709]}{21941@[b2+1:1145]}	{21938@10}{21940@1}{21941@1}		23.1814	158.006	26	2;2	4	5	1
NS1	NS1	40	113	NS1NS140113	S	Y	3	W:\Collaboration_Services\Raw_files_FPL\Fusion Lumos\2021\Zheng\20211204_ZS_WP_SV_ns1_xlms\2021-12-04-10-10-24\Task1-Calibrate\20211203_ZS_WP_SV_ns1_R3-calib.mzML	20599	20591	797.892	4	3187.54	Intra	S;Y		NS1	40	FQPESPSKLASAIQK	FQPESPSKLASAIQK(7)	1629.87	15.0728	[b2+1, b4+1, b5+1];[y3+1, y4+1, y5+1, y6+1, y7+1, y10+1, y10+1, y11+1, y13+1, y13+1];[M15+2, M15+2]	[b2+1:276.13400, b4+1:502.22687, b5+1:589.25971];[y3+1:388.25517, y4+1:459.29237, y5+1:546.32390, y6+1:617.36050, y7+1:730.44471, y10+1:1096.63060, y10+1:1128.61008, y11+1:1215.64432, y13+1:1409.76185, y13+1:1441.73646];[M15+2:842.94819, M15+2:858.93400]	[b2+1:-0.00027, b4+1:-0.00275, b5+1:-0.00194];[y3+1:-0.00027, y4+1:-0.00019, y5+1:-0.00068, y6+1:-0.00120, y7+1:-0.00105, y10+1:-0.00548, y10+1:0.00192, y11+1:0.00413, y13+1:-0.00162, y13+1:0.00091];[M15+2:-0.00136, M15+2:-0.00181]	[b2+1:-0.97, b4+1:-5.50, b5+1:-3.30];[y3+1:-0.71, y4+1:-0.41, y5+1:-1.25, y6+1:-1.94, y7+1:-1.45, y10+1:-5.00, y10+1:1.70, y11+1:3.40, y13+1:-1.15, y13+1:0.63];[M15+2:-0.81, M15+2:-1.06]	[b2+1:362666, b4+1:22742, b5+1:39039];[y3+1:34470, y4+1:30985, y5+1:88769, y6+1:90160, y7+1:39197, y10+1:30672, y10+1:56237, y11+1:38769, y13+1:83322, y13+1:158695];[M15+2:620248, M15+2:805122]	15		NS1	113	YSWKAWGKAK	YSWKAWGK[DSSO:DSSO_hydro_K on K]AK(1)	1399.66	10.0245	[b4+1, b5+1, b5+1, b6+1, b6+1];[y4+1, y5+1, y6+1];[M10+1, M10+2]	[b4+1:619.28609, b5+1:690.32317, b5+1:722.30048, b6+1:876.40278, b6+1:908.37106];[y4+1:579.27949, y5+1:765.35812, y6+1:836.39705];[M10+1:1454.67583, M10+2:743.82755]	[b4+1:-0.00138, b5+1:-0.00141, b5+1:0.00382, b6+1:-0.00111, b6+1:-0.00492];[y4+1:-0.00116, y5+1:-0.00184, y6+1:-0.00002];[M10+1:-0.00143, M10+2:-0.00151]	[b4+1:-2.22, b5+1:-2.05, b5+1:5.29, b6+1:-1.27, b6+1:-5.42];[y4+1:-2.00, y5+1:-2.41, y6+1:-0.03];[M10+1:-0.99, M10+2:-1.02]	[b4+1:50948, b5+1:58658, b5+1:34628, b6+1:49133, b6+1:24010];[y4+1:85099, y5+1:80047, y6+1:52627];[M10+1:156744, M10+2:251049]	10		25.0973	158.008	10	2;2	4	21	19
NS1	NS1	40	116	NS1NS140116	S	K	1	W:\Collaboration_Services\Raw_files_FPL\Fusion Lumos\2021\Zheng\20211204_ZS_WP_SV_ns1_xlms\2021-12-04-10-10-24\Task1-Calibrate\20211203_ZS_WP_SV_ns1_R1-calib.mzML	20880	20845	704.106	4	2812.39	Intra	S;K		NS1	40	FQPESPSKLASAIQK	FQPESPSKLASAIQK(7)	1629.87	13.1548	[b2+1, b5+1];[y5+1, y6+1, y7+1, y10+1, y10+1, y11+1, y11+1, y13+1, y13+2];[M15+2, M15+2]	[b2+1:276.13515, b5+1:589.26310];[y5+1:546.32604, y6+1:617.36313, y7+1:730.44732, y10+1:1096.63695, y10+1:1128.60969, y11+1:1183.66892, y11+1:1215.64239, y13+1:1409.76315, y13+2:721.37282];[M15+2:842.95064, M15+2:858.93635]	[b2+1:0.00088, b5+1:0.00145];[y5+1:0.00145, y6+1:0.00143, y7+1:0.00155, y10+1:0.00087, y10+1:0.00153, y11+1:0.00081, y11+1:0.00220, y13+1:-0.00032, y13+2:0.00282];[M15+2:0.00355, M15+2:0.00289]	[b2+1:3.21, b5+1:2.46];[y5+1:2.66, y6+1:2.32, y7+1:2.13, y10+1:0.79, y10+1:1.36, y11+1:0.68, y11+1:1.81, y13+1:-0.23, y13+2:1.96];[M15+2:2.11, M15+2:1.69]	[b2+1:976986, b5+1:119313];[y5+1:384268, y6+1:411094, y7+1:269862, y10+1:172123, y10+1:138315, y11+1:166353, y11+1:123535, y13+1:114565, y13+2:2996963];[M15+2:904573, M15+2:2706538]	13		NS1	116	YSWKAWGK	YSWKAWGK(4)	1024.51	8.08361	{20880@[y3+1, y4+1, y5+1, y6+1, y6+1, y7+1];[M8+2, M8+2]}{20882@[y2+1]}{20883@[y2+1, y6+1]}	{20880@[y3+1:390.21469, y4+1:461.25184, y5+1:643.35810, y6+1:829.43695, y6+1:861.40976, y7+1:916.46893];[M8+2:540.27012, M8+2:556.25609]}{20882@[y2+1:204.13387]}{20883@[y2+1:204.13388, y6+1:861.40233]}	{20880@[y3+1:0.00111, y4+1:0.00114, y5+1:0.00188, y6+1:0.00142, y6+1:0.00215, y7+1:0.00137];[M8+2:0.00208, M8+2:0.00194]}{20882@[y2+1:-0.00040]}{20883@[y2+1:-0.00039, y6+1:-0.00529]}	{20880@[y3+1:2.85, y4+1:2.48, y5+1:2.92, y6+1:1.71, y6+1:2.49, y7+1:1.50];[M8+2:1.93, M8+2:1.75]}{20882@[y2+1:-1.96]}{20883@[y2+1:-1.91, y6+1:-6.14]}	{20880@[y3+1:110791, y4+1:208524, y5+1:140236, y6+1:343535, y6+1:191430, y7+1:96384];[M8+2:3192868, M8+2:837976]}{20882@[y2+1:3499]}{20883@[y2+1:2525, y6+1:4462]}	{20880@8}{20882@1}{20883@2}		21.2384	158.008	58	2;2	4	2	4
NS1	NS1	44	112	NS1NS144112	K	S	1	W:\Collaboration_Services\Raw_files_FPL\Fusion Lumos\2021\Zheng\20211204_ZS_WP_SV_ns1_xlms\2021-12-04-10-10-24\Task1-Calibrate\20211203_ZS_WP_SV_ns1_R1-calib.mzML	20579	20550	727.699	6	4360.15	Intra	K;S		NS1	112	SLRPQPTELKYSWKAWGK	SLRPQPTELKYSWK[DSSO:DSSO_hydro_K on K]AWGK(10)	2350.18	9.03929	[y3+1, y4+1, y6+1, y7+1];[b5+1, b8+1, b10+2];[M18+3, M18+3]	[y3+1:390.21404, y4+1:461.25132, y6+1:951.43630, y7+1:1038.47523];[b5+1:582.33657, b8+1:909.47845, b10+2:602.83841];[M18+3:802.40194, M18+3:813.06108]	[y3+1:0.00046, y4+1:0.00063, y6+1:-0.00297, y7+1:0.00393];[b5+1:0.00075, b8+1:-0.00041, b10+2:0.00110];[M18+3:-0.00452, M18+3:0.00082]	[y3+1:1.18, y4+1:1.36, y6+1:-3.13, y7+1:3.79];[b5+1:1.28, b8+1:-0.45, b10+2:0.92];[M18+3:-1.88, M18+3:0.34]	[y3+1:160434, y4+1:154561, y6+1:60375, y7+1:64970];[b5+1:127967, b8+1:55799, b10+2:168295];[M18+3:118224, M18+3:188592]	9		NS1	44	LASAIQKAHEEGICGIR	LASAIQKAHEEGIC[Common Fixed:Carbamidomethyl on C]GIR(3)	1851.96	7.07823	{20579@[y3+1, y4+1, y10+2, y15+3, y15+2];[M17+3, M17+2]}{20582@[y10+1]}{20583@}	{20579@[y3+1:345.22323, y4+1:505.25550, y10+2:571.27517, y15+3:574.95800, y15+2:877.91883];[M17+3:636.33159, M17+2:969.97886]}{20582@[y10+1:1141.53569]}{20583@}	{20579@[y3+1:-0.00125, y4+1:0.00037, y10+2:0.00120, y15+3:0.00029, y15+2:-0.00086];[M17+3:-0.00015, M17+2:-0.00200]}{20582@[y10+1:-0.00617]}{20583@}	{20579@[y3+1:-3.64, y4+1:0.74, y10+2:1.05, y15+3:0.17, y15+2:-0.49];[M17+3:-0.08, M17+2:-1.03]}{20582@[y10+1:-5.41]}{20583@}	{20579@[y3+1:48293, y4+1:138057, y10+2:84934, y15+3:101367, y15+2:95642];[M17+3:1540854, M17+2:179606]}{20582@[y10+1:2796]}{20583@}	{20579@7}{20582@1}{20583@0}		16.1175	158.009	65	2;2	4	11	3
NS1	NS1	72	116	NS1NS172116	T	K	2	W:\Collaboration_Services\Raw_files_FPL\Fusion Lumos\2021\Zheng\20211204_ZS_WP_SV_ns1_xlms\2021-12-04-10-10-24\Task1-Calibrate\20211203_ZS_WP_SV_ns1_R2-calib.mzML	30305	30289	868.43	5	4337.12	Intra	T;K		NS1	72	LENLMWKQITPELNHILSENEVK	LENLM[Common Variable:Oxidation on M]WK[DSSO:DSSO_alkene_K on K]QITPELNHILSENEVK(10)	2847.45	5.03406	[b4+1];[y6+1, y7+1, y8+1, y13+2]	[b4+1:470.26316];[y6+1:705.34188, y7+1:818.42499, y8+1:931.50793, y13+2:761.39954]	[b4+1:0.00223];[y6+1:0.00052, y7+1:-0.00044, y8+1:-0.00156, y13+2:0.00106]	[b4+1:4.76];[y6+1:0.74, y7+1:-0.53, y8+1:-1.67, y13+2:0.70]	[b4+1:5986];[y6+1:4958, y7+1:15551, y8+1:6210, y13+2:63790]	5		NS1	116	YSWKAWGKAK	Y[DSSO:DSSO_alkene_Y on Y]SWKAWGK[DSSO:DSSO_alkene_K on K]AK(4)	1331.67	5.01099	[y5+1, y6+1, y7+1, y8+2, y8+2]	[y5+1:643.35724, y6+1:714.39404, y7+1:928.46484, y8+2:541.79384, y8+2:557.77909]	[y5+1:0.00099, y6+1:0.00067, y7+1:-0.00614, y8+2:0.00220, y8+2:0.00062]	[y5+1:1.54, y6+1:0.94, y7+1:-6.62, y8+2:2.03, y8+2:0.55]	[y5+1:8694, y6+1:9048, y7+1:3833, y8+2:3420, y8+2:6123]	5		10.045	158.001	29	0;0	0	-	-
NS1	NS1	72	204	NS1NS172204	T	S	1	W:\Collaboration_Services\Raw_files_FPL\Fusion Lumos\2021\Zheng\20211204_ZS_WP_SV_ns1_xlms\2021-12-04-10-10-24\Task1-Calibrate\20211203_ZS_WP_SV_ns1_R1-calib.mzML	25910	25850	955.241	5	4771.17	Intra	T;S		NS1	72	QITPELNHILSENEVK	QITPELNHILSENEVK(3)	1862.97	8.02454	[y4+1, y5+1, y6+1, y7+1, y8+1, y9+1, y10+1, y13+1]	[y4+1:489.26811, y5+1:618.31286, y6+1:705.34280, y7+1:818.42730, y8+1:931.50903, y9+1:1068.56700, y10+1:1182.61315, y13+1:1521.79088]	[y4+1:0.00138, y5+1:0.00353, y6+1:0.00144, y7+1:0.00188, y8+1:-0.00046, y9+1:-0.00140, y10+1:0.00182, y13+1:0.00013]	[y4+1:2.82, y5+1:5.71, y6+1:2.04, y7+1:2.30, y8+1:-0.49, y9+1:-1.31, y10+1:1.54, y13+1:0.09]	[y4+1:14925, y5+1:8169, y6+1:48949, y7+1:33194, y8+1:12752, y9+1:14915, y10+1:25584, y13+1:42971]	8		NS1	204	DNRAVHADMGYWIESALNDTWK	DN[Common Artifact:Deamidation on N]RAVHADMGY[DSSO:DSSO_loop_Y on Y]WIESALNDTWK(15)	2750.17	2.00654	[y4+1];[b6+1]	[y4+1:549.26760];[b6+1:694.32285]	[y4+1:0.00086];[b6+1:-0.00387]	[y4+1:1.58];[b6+1:-5.57]	[y4+1:9411];[b6+1:44317]	2		10.0311	158.02	45	0;0	0	-	-
NS1	NS1	87	113	NS1NS187113	T	Y	2	W:\Collaboration_Services\Raw_files_FPL\Fusion Lumos\2021\Zheng\20211204_ZS_WP_SV_ns1_xlms\2021-12-04-10-10-24\Task1-Calibrate\20211203_ZS_WP_SV_ns1_R2-calib.mzML	27561	27519	886.832	5	4429.12	Intra	T;Y		NS1	87	QITPELNHILSENEVKMTIMTGDIK	QIT[DSSO:DSSO_alkene_T on T]PELNHILS[DSSO:DSSO_thiol_S on S]ENEVKMTIMTGDIK(18)	2993.45	6.02234	[y4+1, y5+1, y6+1, y7+1, y9+1];[b7+1]	[y4+1:432.24392, y5+1:533.29406, y6+1:664.33394, y7+1:777.41732, y9+1:1095.49427];[b7+1:850.43205]	[y4+1:-0.00135, y5+1:0.00110, y6+1:0.00050, y7+1:-0.00019, y9+1:0.00597];[b7+1:0.00150]	[y4+1:-3.13, y5+1:2.07, y6+1:0.75, y7+1:-0.24, y9+1:5.45];[b7+1:1.77]	[y4+1:3742, y5+1:5770, y6+1:15011, y7+1:4357, y9+1:4479];[b7+1:4254]	6		NS1	113	YSWKAWGKAK	YSWKAWGK[DSSO:DSSO_alkene_K on K]AK(1)	1277.66	4.05078	{27561@[y4+1, y6+1];[M10+2, M10+2]}{27563@}	{27561@[y4+1:457.27627, y6+1:714.38972];[M10+2:666.84041, M10+2:682.82637]}{27563@}	{27561@[y4+1:-0.00067, y6+1:-0.00365];[M10+2:-0.00002, M10+2:-0.00018]}{27563@}	{27561@[y4+1:-1.48, y6+1:-5.12];[M10+2:-0.02, M10+2:-0.13]}{27563@}	{27561@[y4+1:3166, y6+1:3748];[M10+2:27734, M10+2:50828]}{27563@}	{27561@4}{27563@0}		10.0731	158.011	37	0;2	2	-	48
NS1	NS1	9	181	NS1NS19181	S	K	1	W:\Collaboration_Services\Raw_files_FPL\Fusion Lumos\2021\Zheng\20211204_ZS_WP_SV_ns1_xlms\2021-12-04-10-10-24\Task1-Calibrate\20211203_ZS_WP_SV_ns1_R1-calib.mzML	17359	17329	675.716	5	3373.55	Intra	S;K		NS1	181	ERQDVSCDSKLMSAAIK	ERQDVSC[Common Fixed:Carbamidomethyl on C]DSKLMSAAIK(9)	1936.93	12.1432	[y2+1, y3+1, y4+1, y5+1, y6+1, y7+1, y12+2];[b5+1, b6+1, b16+2];[M17+3, M17+2]	[y2+1:260.19717, y3+1:331.23398, y4+1:402.27140, y5+1:489.30287, y6+1:620.34440, y7+1:733.42753, y12+2:698.81491];[b5+1:628.30615, b6+1:715.33985, b16+2:923.42505];[M17+3:664.65510, M17+2:1012.46652]	[y2+1:0.00030, y3+1:-0.00000, y4+1:0.00031, y5+1:-0.00026, y6+1:0.00079, y7+1:-0.00014, y12+2:-0.00438];[b5+1:0.00124, b6+1:0.00291, b16+2:-0.00412];[M17+3:-0.00174, M17+2:0.00120]	[y2+1:1.16, y3+1:-0.00, y4+1:0.77, y5+1:-0.53, y6+1:1.28, y7+1:-0.19, y12+2:-3.14];[b5+1:1.98, b6+1:4.08, b16+2:-2.23];[M17+3:-0.88, M17+2:0.59]	[y2+1:3423, y3+1:3298, y4+1:12090, y5+1:24947, y6+1:41698, y7+1:38130, y12+2:4270];[b5+1:16957, b6+1:8299, b16+2:27498];[M17+3:125873, M17+2:5773]	12		NS1	9	DSGCVVSWKNK	DSGC[Common Fixed:Carbamidomethyl on C]VVSWKNK(9)	1278.6	11.1014	{17359@[y2+1, y4+1, y5+1, y5+1, y6+1, y7+1];[b5+1, b6+1, b7+1, b9+1];[M11+2]}{17365@}	{17359@[y2+1:261.15530, y4+1:661.31306, y5+1:716.37013, y5+1:748.34382, y6+1:847.41234, y7+1:946.48344];[b5+1:519.18670, b6+1:618.25476, b7+1:705.28541, b9+1:1105.44384];[M11+2:667.31430]}{17365@}	{17359@[y2+1:-0.00043, y4+1:0.00041, y5+1:-0.00247, y5+1:-0.00085, y6+1:-0.00075, y7+1:0.00193];[b5+1:-0.00008, b6+1:-0.00043, b7+1:-0.00181, b9+1:-0.00030];[M11+2:0.00081]}{17365@}	{17359@[y2+1:-1.66, y4+1:0.62, y5+1:-3.45, y5+1:-1.14, y6+1:-0.89, y7+1:2.04];[b5+1:-0.15, b6+1:-0.69, b7+1:-2.56, b9+1:-0.27];[M11+2:0.61]}{17365@}	{17359@[y2+1:5155, y4+1:14668, y5+1:11985, y5+1:40626, y6+1:27186, y7+1:7929];[b5+1:14628, b6+1:38580, b7+1:6194, b9+1:7560];[M11+2:46481]}{17365@}	{17359@11}{17365@0}		23.2446	158.008	10	2;1	3	35	4
	Total 180 rows
	ApoA1:ApoA1	78
	isNS1wt:isNS1wt	77
	isNS1wt:ApoA1	25
	Sum	180
[truncated: 4 more columns]

## Sheet: AllCrosslinks_Tsmut
ProteinA	ProteinB	PosA	PosB	Crosslink	ResA	ResB	Replicate	File Name	Scan Number	Precursor Scan Number	Precursor MZ	Precursor Charge	Precursor Mass	Cross Type	Link Residues	Peptide Info -->	Protein Accession	Protein Link Site	Base Sequence	Full Sequence	Peptide Monoisotopic Mass	Score	Matched Ion Series	Matched Ion Mass-To-Charge Ratios	Matched Ion Mass Diff (Da)	Matched Ion Mass Diff (Ppm)	Matched Ion Intensities	Matched Ion Counts	Beta Peptide Info -->	Beta Peptide Protein Accession	Beta Peptide Protein LinkSite	Beta Peptide Base Sequence	Beta Peptide Full Sequence	Beta Peptide Theoretical Mass	Beta Peptide Score	Beta Peptide Matched Ions	Beta Peptide Matched Ion Mass-To-Charge Ratios	Beta Peptide Matched Ion Mass Diff (Da)	Beta Peptide Matched Ion Mass Diff (Ppm)	Beta Peptide Matched Ion Intensities	Beta Peptide Matched Ion Counts	Summary Info -->	XL Total Score	Mass Diff (Da)	AlphaIndexingRank	Parent Ions	ParentIonsNum	AlphaParentIonMaxIntensityRank	BetaParentIonMaxIntensityRank
tsmutNS1	ApoA1	116	141	tsmutNS1ApoA1116141	K	K	1	W:\Collaboration_Services\Raw_files_FPL\Fusion Lumos\2021\Zheng\20211204_ZS_WP_SV_ns1_xlms\2022-01-21-16-12-41\Task1-Calibrate\20220119_ZS_WP_SV_Ns1Tsmut_R1-calib.mzML	21569	21487	614.806	4	2455.2	Inter	K;K		ApoA1	141	QKVAPLGEEFR	QKVAPLGEEFR(2)	1272.68	18.2107	{21569@[y2+1, y3+1, y4+1, y5+1, y6+1, y7+1, y8+1, y9+1];[b2+1, b3+1, b3+1, b4+1, b4+1, b6+1, b6+1, b7+1];[M11+2, M11+2]}{21571@[b1+1]}{21572@}{21573@[y8+1, y9+1]}{21574@[y8+1, y9+1]}	{21569@[y2+1:322.18754, y3+1:451.23021, y4+1:580.27227, y5+1:637.29400, y6+1:750.37697, y7+1:847.43070, y8+1:918.46717, y9+1:1017.53704];[b2+1:343.14309, b3+1:410.23895, b3+1:442.21232, b4+1:481.27710, b4+1:513.24998, b6+1:691.41649, b6+1:723.38574, b7+1:780.40885];[M11+2:664.35367, M11+2:680.34031]}{21571@[b1+1:129.06673]}{21572@}{21573@[y8+1:918.46568, y9+1:1017.53239]}{21574@[y8+1:918.46577, y…	{21569@[y2+1:0.00018, y3+1:0.00025, y4+1:-0.00028, y5+1:-0.00002, y6+1:-0.00111, y7+1:-0.00015, y8+1:-0.00079, y9+1:0.00067];[b2+1:-0.00037, b3+1:-0.00084, b3+1:0.00045, b4+1:0.00020, b4+1:0.00099, b6+1:0.00276, b6+1:-0.00007, b7+1:0.00157];[M11+2:-0.00040, M11+2:0.00080]}{21571@[b1+1:0.00088]}{21572@}{21573@[y8+1:-0.00228, y9+1:-0.00398]}{21574@[y8+1:-0.00219, y9+1:-0.00387]}	{21569@[y2+1:0.55, y3+1:0.56, y4+1:-0.49, y5+1:-0.03, y6+1:-1.48, y7+1:-0.17, y8+1:-0.86, y9+1:0.66];[b2+1:-1.07, b3+1:-2.06, b3+1:1.03, b4+1:0.41, b4+1:1.94, b6+1:4.00, b6+1:-0.09, b7+1:2.01];[M11+2:-0.30, M11+2:0.59]}{21571@[b1+1:6.87]}{21572@}{21573@[y8+1:-2.49, y9+1:-3.92]}{21574@[y8+1:-2.38, y9+1:-3.81]}	{21569@[y2+1:17110, y3+1:29494, y4+1:19003, y5+1:112071, y6+1:15410, y7+1:289514, y8+1:34007, y9+1:13057];[b2+1:4881, b3+1:4819, b3+1:12604, b4+1:15208, b4+1:28112, b6+1:6562, b6+1:10448, b7+1:5499];[M11+2:49595, M11+2:193234]}{21571@[b1+1:103]}{21572@}{21573@[y8+1:478, y9+1:275]}{21574@[y8+1:60, y9+1:141]}	{21569@18}{21571@1}{21572@0}{21573@2}{21574@2}		tsmutNS1	116	YSWKAWGK	YSWKAWGK(4)	1024.51	10.1493	{21569@[b2+1, b6+1];[y2+1, y3+1, y4+1, y5+1, y6+1, y6+1];[M8+2, M8+2]}{21571@[y2+1, y7+1]}{21572@[y2+1]}{21573@}{21574@}	{21569@[b2+1:251.10303, b6+1:876.40688];[y2+1:204.13443, y3+1:390.21410, y4+1:461.25112, y5+1:643.35519, y6+1:829.43333, y6+1:861.40577];[M8+2:540.26923, M8+2:556.25516]}{21571@[y2+1:204.13344, y7+1:916.46566]}{21572@[y2+1:204.13345]}{21573@}{21574@}	{21569@[b2+1:0.00040, b6+1:0.00299];[y2+1:0.00016, y3+1:0.00052, y4+1:0.00043, y5+1:-0.00103, y6+1:-0.00220, y6+1:-0.00184];[M8+2:0.00030, M8+2:0.00007]}{21571@[y2+1:-0.00083, y7+1:-0.00190]}{21572@[y2+1:-0.00082]}{21573@}{21574@}	{21569@[b2+1:1.60, b6+1:3.41];[y2+1:0.79, y3+1:1.33, y4+1:0.93, y5+1:-1.60, y6+1:-2.66, y6+1:-2.13];[M8+2:0.28, M8+2:0.06]}{21571@[y2+1:-4.10, y7+1:-2.07]}{21572@[y2+1:-4.04]}{21573@}{21574@}	{21569@[b2+1:7802, b6+1:7617];[y2+1:9687, y3+1:14545, y4+1:16723, y5+1:7573, y6+1:14070, y6+1:8065];[M8+2:446128, M8+2:77626]}{21571@[y2+1:456, y7+1:517]}{21572@[y2+1:25]}{21573@}{21574@}	{21569@10}{21571@2}{21572@1}{21573@0}{21574@0}		28.3599	158.001	6	2;2	4	3	1
tsmutNS1	ApoA1	120	141	tsmutNS1ApoA1120141	K	K	1	W:\Collaboration_Services\Raw_files_FPL\Fusion Lumos\2021\Zheng\20211204_ZS_WP_SV_ns1_xlms\2022-01-21-16-12-41\Task1-Calibrate\20220119_ZS_WP_SV_Ns1Tsmut_R1-calib.mzML	15035	14999	523.523	4	2090.06	Inter	K;K		ApoA1	141	QKVAPLGEEFR	QKVAPLGEEFR(2)	1272.68	18.1157	{15035@[y1+1, y2+1, y3+1, y4+2, y5+2, y6+1, y7+2, y8+1];[b4+1, b4+1, b5+2, b5+1, b6+1, b6+1, b7+2, b7+1];[M11+3, M11+3]}{15040@}{15041@}{15042@[y9+1]}{15043@}	{15035@[y1+1:175.11893, y2+1:322.18772, y3+1:451.23017, y4+2:290.63999, y5+2:319.15086, y6+1:750.37761, y7+2:424.21936, y8+1:918.46743];[b4+1:481.27622, b4+1:513.25031, b5+2:289.66880, b5+1:610.30305, b6+1:691.41456, b6+1:723.38595, b7+2:374.72158, b7+1:780.40810];[M11+3:443.23862, M11+3:453.89623]}{15040@}{15041@}{15042@[y9+1:1017.53425]}{15043@}	{15035@[y1+1:-0.00003, y2+1:0.00035, y3+1:0.00021, y4+2:0.00015, y5+2:0.00043, y6+1:-0.00047, y7+2:0.00060, y8+1:-0.00053];[b4+1:-0.00069, b4+1:0.00132, b5+2:0.00066, b5+1:0.00131, b6+1:0.00083, b6+1:0.00013, b7+2:0.00069, b7+1:0.00082];[M11+3:0.00085, M11+3:0.00157]}{15040@}{15041@}{15042@[y9+1:-0.00212]}{15043@}	{15035@[y1+1:-0.15, y2+1:1.10, y3+1:0.47, y4+2:0.26, y5+2:0.67, y6+1:-0.62, y7+2:0.71, y8+1:-0.57];[b4+1:-1.43, b4+1:2.58, b5+2:1.15, b5+1:2.14, b6+1:1.20, b6+1:0.18, b7+2:0.93, b7+1:1.05];[M11+3:0.64, M11+3:1.16]}{15040@}{15041@}{15042@[y9+1:-2.09]}{15043@}	{15035@[y1+1:37128, y2+1:196594, y3+1:481113, y4+2:36283, y5+2:274657, y6+1:38952, y7+2:137898, y8+1:13833];[b4+1:49901, b4+1:26838, b5+2:44966, b5+1:47952, b6+1:82714, b6+1:46781, b7+2:39610, b7+1:29078];[M11+3:94715, M11+3:23559]}{15040@}{15041@}{15042@[y9+1:167]}{15043@}	{15035@18}{15040@0}{15041@0}{15042@1}{15043@0}		tsmutNS1	120	AWGKAK	AWGKAK(4)	659.375	4.03418	{15035@[b2+1];[y4+1];[M6+2, M6+2]}{15040@}{15041@}{15042@}{15043@}	{15035@[b2+1:258.12378];[y4+1:457.27746];[M6+2:357.70060, M6+2:373.68633]}{15040@}{15041@}{15042@}{15043@}	{15035@[b2+1:0.00008];[y4+1:0.00056];[M6+2:0.00060, M6+2:-0.00003]}{15040@}{15041@}{15042@}{15043@}	{15035@[b2+1:0.31];[y4+1:1.22];[M6+2:0.84, M6+2:-0.03]}{15040@}{15041@}{15042@}{15043@}	{15035@[b2+1:59954];[y4+1:97231];[M6+2:271998, M6+2:73936]}{15040@}{15041@}{15042@}{15043@}	{15035@4}{15040@0}{15041@0}{15042@0}{15043@0}		22.1499	158.005	4	2;2	4	21	8
ApoA1	ApoA1	63	261	ApoA1ApoA163261	K	K	1	W:\Collaboration_Services\Raw_files_FPL\Fusion Lumos\2021\Zheng\20211204_ZS_WP_SV_ns1_xlms\2022-01-21-16-12-41\Task1-Calibrate\20220119_ZS_WP_SV_Ns1Tsmut_R1-calib.mzML	29079	29029	909.135	3	2724.38	Intra	K;K		ApoA1	63	DYVAQFEASALGKQLNLK	DYVAQFEASALGKQLNLK(13)	1994.05	44.1956	{29079@[b2+1, b3+1, b4+1, b5+1, b6+1, b7+1, b8+1, b9+1, b10+1, b11+1, b12+1, b13+1, b13+1, b14+1, b14+1, b15+1, b15+1, b16+1];[y3+1, y4+1, y5+1, y6+1, y6+1, y7+1, y7+1, y8+1, y8+1, y9+1, y9+1, y10+1, y10+1, y11+1, y11+1, y12+1, y12+1, y13+1, y13+1, y14+1, y14+1, y15+1, y15+1, y16+1];[M18+2, M18+2]}{29084@[b4+1];[y10+1, y12+1, y13+1]}{29085@[y11+1]}{29086@[b6+1]}{29087@}	{29079@[b2+1:279.09740, b3+1:378.16650, b4+1:449.20304, b5+1:577.26206, b6+1:724.33040, b7+1:853.37165, b8+1:924.41021, b9+1:1011.44256, b10+1:1082.48084, b11+1:1195.56333, b12+1:1252.58517, b13+1:1434.69044, b13+1:1466.66439, b14+1:1562.75015, b14+1:1594.72514, b15+1:1675.83349, b15+1:1707.80354, b16+1:1789.87904];[y3+1:374.23993, y4+1:487.32424, y5+1:615.38288, y6+1:797.48885, y6+1:829.45920, y…	{29079@[b2+1:-0.00015, b3+1:0.00054, b4+1:-0.00004, b5+1:0.00041, b6+1:0.00033, b7+1:-0.00101, b8+1:0.00044, b9+1:0.00076, b10+1:0.00193, b11+1:0.00034, b12+1:0.00073, b13+1:0.00047, b13+1:0.00235, b14+1:0.00160, b14+1:0.00452, b15+1:0.00088, b15+1:-0.00115, b16+1:0.00351];[y3+1:0.00013, y4+1:0.00038, y5+1:0.00044, y6+1:0.00089, y6+1:-0.00084, y7+1:0.00131, y7+1:0.00128, y8+1:-0.00004, y8+1:0.002…	{29079@[b2+1:-0.55, b3+1:1.42, b4+1:-0.08, b5+1:0.71, b6+1:0.46, b7+1:-1.18, b8+1:0.47, b9+1:0.75, b10+1:1.78, b11+1:0.29, b12+1:0.58, b13+1:0.33, b13+1:1.60, b14+1:1.03, b14+1:2.83, b15+1:0.53, b15+1:-0.67, b16+1:1.96];[y3+1:0.35, y4+1:0.79, y5+1:0.72, y6+1:1.12, y6+1:-1.01, y7+1:1.53, y7+1:1.45, y8+1:-0.04, y8+1:2.26, y9+1:-1.30, y9+1:-0.22, y10+1:1.14, y10+1:-5.36, y11+1:3.29, y11+1:-0.44, y12…	{29079@[b2+1:42217, b3+1:97720, b4+1:44276, b5+1:35430, b6+1:59404, b7+1:52033, b8+1:52015, b9+1:38443, b10+1:45383, b11+1:132784, b12+1:29621, b13+1:18550, b13+1:19179, b14+1:16150, b14+1:13907, b15+1:20986, b15+1:13665, b16+1:11277];[y3+1:36377, y4+1:39589, y5+1:72264, y6+1:20264, y6+1:18209, y7+1:78951, y7+1:130845, y8+1:42323, y8+1:35869, y9+1:19276, y9+1:24273, y10+1:48520, y10+1:45800, y11+…	{29079@44}{29084@4}{29085@1}{29086@1}{29087@0}		ApoA1	261	KLNAQ	KLNAQ(1)	572.328	7.11877	{29079@[b3+1, b3+1, b4+1, b4+1];[y3+1];[M5+1, M5+1]}{29084@}{29085@}{29086@}{29087@}	{29079@[b3+1:410.24004, b3+1:442.21146, b4+1:481.27742, b4+1:513.24969];[y3+1:332.15684];[M5+1:627.34638, M5+1:659.31857]}{29084@}{29085@}{29086@}{29087@}	{29079@[b3+1:0.00025, b3+1:-0.00041, b4+1:0.00051, b4+1:0.00071];[y3+1:0.00038];[M5+1:0.00033, M5+1:0.00045]}{29084@}{29085@}{29086@}{29087@}	{29079@[b3+1:0.60, b3+1:-0.94, b4+1:1.06, b4+1:1.38];[y3+1:1.14];[M5+1:0.53, M5+1:0.68]}{29084@}{29085@}{29086@}{29087@}	{29079@[b3+1:28876, b3+1:25240, b4+1:87814, b4+1:76409];[y3+1:19907];[M5+1:603129, M5+1:519298]}{29084@}{29085@}{29086@}{29087@}	{29079@7}{29084@0}{29085@0}{29086@0}{29087@0}		51.3144	158.007	20	2;2	4	3	2
tsmutNS1	tsmutNS1	69	94	tsmutNS1tsmutNS16994	K	K	1	W:\Collaboration_Services\Raw_files_FPL\Fusion Lumos\2021\Zheng\20211204_ZS_WP_SV_ns1_xlms\2022-01-21-16-12-41\Task1-Calibrate\20220119_ZS_WP_SV_Ns1Tsmut_R1-calib.mzML	31411	31406	930.068	5	4645.31	Intra	K;K		tsmutNS1	69	LENLMWKQITPELNHILSENEVK	LENLMWKQITPELNHILSENEVK(7)	2777.44	27.1736	{31411@[b3+1, b4+1, b5+1, b6+1, b7+1, b7+1, b8+1, b8+1, b9+1, b9+1, b10+1, b10+1];[y6+1, y7+1, y13+2, y14+2, y15+2, y16+2, y17+2, y17+2, y18+2, y18+2, y19+2, y19+2, y21+2];[M23+2, M23+2]}{31416@}{31417@}{31418@[b2+1];[y13+1]}{31419@}	{31411@[b3+1:357.17640, b4+1:470.26044, b5+1:601.30137, b6+1:787.38263, b7+1:969.48561, b7+1:1001.46134, b8+1:1097.53985, b8+1:1129.52311, b9+1:1210.62717, b9+1:1242.59936, b10+1:1311.66870, b10+1:1343.64916];[y6+1:705.34164, y7+1:818.42447, y13+2:761.39900, y14+2:811.92262, y15+2:868.46530, y16+2:932.49569, y17+2:1023.54598, y17+2:1039.53144, y18+2:1116.58624, y18+2:1132.57288, y19+2:1182.10738,…	{31411@[b3+1:-0.00046, b4+1:-0.00048, b5+1:-0.00004, b6+1:0.00191, b7+1:-0.00064, b7+1:0.00301, b8+1:-0.00498, b8+1:0.00620, b9+1:-0.00171, b9+1:-0.00161, b10+1:-0.00787, b10+1:0.00051];[y6+1:0.00028, y7+1:-0.00095, y13+2:-0.00003, y14+2:-0.00047, y15+2:0.00082, y16+2:0.00303, y17+2:-0.00190, y17+2:-0.00306, y18+2:-0.00070, y18+2:0.00050, y19+2:0.00110, y19+2:-0.00206, y21+2:0.00151];[M23+2:-0.00…	{31411@[b3+1:-1.28, b4+1:-1.03, b5+1:-0.07, b6+1:2.42, b7+1:-0.66, b7+1:3.01, b8+1:-4.54, b8+1:5.50, b9+1:-1.42, b9+1:-1.29, b10+1:-6.00, b10+1:0.38];[y6+1:0.39, y7+1:-1.17, y13+2:-0.02, y14+2:-0.29, y15+2:0.47, y16+2:1.63, y17+2:-0.93, y17+2:-1.47, y18+2:-0.31, y18+2:0.22, y19+2:0.47, y19+2:-0.86, y21+2:0.58];[M23+2:-0.37, M23+2:-0.20]}{31416@}{31417@}{31418@[b2+1:-2.07];[y13+1:5.57]}{31419@}	{31411@[b3+1:10790, b4+1:12470, b5+1:25162, b6+1:18420, b7+1:15407, b7+1:18209, b8+1:17314, b8+1:14046, b9+1:28793, b9+1:29803, b10+1:21223, b10+1:10201];[y6+1:17736, y7+1:38526, y13+2:144662, y14+2:297637, y15+2:71352, y16+2:17237, y17+2:48773, y17+2:19491, y18+2:78104, y18+2:47426, y19+2:48121, y19+2:28476, y21+2:12791];[M23+2:42444, M23+2:40216]}{31416@}{31417@}{31418@[b2+1:135];[y13+1:111]}{3…	{31411@27}{31416@0}{31417@0}{31418@2}{31419@0}		tsmutNS1	94	MTIMTGDIKGIMQAGK	MTIMTGDIKGIM[Common Variable:Oxidation on M]QAGK(9)	1709.85	19.1089	{31411@[y5+1, y7+1, y8+1, y8+1, y11+1, y11+1, y12+1, y12+1, y13+1, y13+2, y14+2, y14+2];[b8+1, b9+1, b9+1, b11+1, b11+1];[M16+2, M16+2]}{31416@[y2+1, y5+1]}{31417@[y2+1, y5+1]}{31418@}{31419@[b13+1]}	{31411@[y5+1:550.26518, y7+1:720.37088, y8+1:902.47438, y8+1:934.45030, y11+1:1187.60714, y11+1:1219.58077, y12+1:1288.65376, y12+1:1320.63025, y13+1:1419.69426, y13+2:726.33853, y14+2:766.89350, y14+2:782.87941];[b8+1:863.39835, b9+1:1045.51281, b9+1:1077.48500, b11+1:1215.60954, b11+1:1247.58667];[M16+2:882.93828, M16+2:898.92310]}{31416@[y2+1:204.13341, y5+1:550.26686]}{31417@[y2+1:204.13341, …	{31411@[y5+1:-0.00018, y7+1:-0.00001, y8+1:-0.00203, y8+1:0.00181, y11+1:-0.00174, y11+1:-0.00019, y12+1:-0.00280, y12+1:0.00161, y13+1:-0.00278, y13+2:0.00065, y14+2:-0.00138, y14+2:-0.00164];[b8+1:-0.00179, b9+1:0.00715, b9+1:0.00726, b11+1:-0.00165, b11+1:0.00340];[M16+2:0.00000, M16+2:-0.00243]}{31416@[y2+1:-0.00086, y5+1:0.00150]}{31417@[y2+1:-0.00086, y5+1:0.00150]}{31418@}{31419@[b13+1:-0.…	{31411@[y5+1:-0.33, y7+1:-0.01, y8+1:-2.25, y8+1:1.93, y11+1:-1.46, y11+1:-0.16, y12+1:-2.17, y12+1:1.22, y13+1:-1.96, y13+2:0.45, y14+2:-0.90, y14+2:-1.05];[b8+1:-2.07, b9+1:6.85, b9+1:6.74, b11+1:-1.36, b11+1:2.73];[M16+2:0.00, M16+2:-1.36]}{31416@[y2+1:-4.22, y5+1:2.74]}{31417@[y2+1:-4.24, y5+1:2.72]}{31418@}{31419@[b13+1:-6.54]}	{31411@[y5+1:56263, y7+1:108379, y8+1:28432, y8+1:27837, y11+1:20263, y11+1:22834, y12+1:18255, y12+1:13208, y13+1:10759, y13+2:12928, y14+2:17107, y14+2:15657];[b8+1:19835, b9+1:19525, b9+1:17726, b11+1:11955, b11+1:14312];[M16+2:134075, M16+2:167572]}{31416@[y2+1:126, y5+1:114]}{31417@[y2+1:131, y5+1:131]}{31418@}{31419@[b13+1:185]}	{31411@19}{31416@2}{31417@2}{31418@0}{31419@1}		46.2825	158.012	9	2;2	4	18	5
ApoA1	ApoA1	141	163	ApoA1ApoA1141163	K	K	1	W:\Collaboration_Services\Raw_files_FPL\Fusion Lumos\2021\Zheng\20211204_ZS_WP_SV_ns1_xlms\2022-01-21-16-12-41\Task1-Calibrate\20220119_ZS_WP_SV_Ns1Tsmut_R1-calib.mzML	26370	26337	825.184	4	3296.71	Intra	K;K		ApoA1	163	VQELQDKLSPLAQELR	VQELQDKLSPLAQELR(7)	1866.02	27.1638	{26370@[y2+1, y3+1, y4+1, y5+1, y6+1, y7+2, y8+1, y9+1, y10+1, y11+1, y11+1, y12+1];[b3+1, b4+1, b5+1, b6+1, b7+1, b8+1, b8+1, b9+1, b9+1, b11+1, b11+1, b12+1, b13+1];[M16+2, M16+2]}{26372@}{26373@}{26374@[b2+1];[y9+1, y10+1]}{26375@[y9+1, y11+1]}	{26370@[y2+1:288.20282, y3+1:417.24551, y4+1:545.30447, y5+1:616.34170, y6+1:729.42609, y7+2:413.74290, y8+1:913.51073, y9+1:1026.59519, y10+1:1240.66946, y11+1:1323.72783, y11+1:1355.69510, y12+1:1483.75801];[b3+1:357.17662, b4+1:470.26078, b5+1:598.31995, b6+1:713.34854, b7+1:927.42571, b8+1:1008.53733, b8+1:1040.50931, b9+1:1095.56854, b9+1:1127.54120, b11+1:1305.70780, b11+1:1337.67861, b12+1…	{26370@[y2+1:-0.00020, y3+1:-0.00010, y4+1:0.00028, y5+1:0.00040, y6+1:0.00073, y7+2:0.00039, y8+1:0.00057, y9+1:0.00097, y10+1:-0.00237, y11+1:0.00114, y11+1:-0.00367, y12+1:0.00067];[b3+1:-0.00024, b4+1:-0.00014, b5+1:0.00045, b6+1:0.00210, b7+1:0.00166, b8+1:0.00130, b8+1:0.00120, b9+1:0.00048, b9+1:0.00106, b11+1:0.00291, b11+1:0.00164, b12+1:0.00074, b13+1:0.00062];[M16+2:0.00197, M16+2:0.00…	{26370@[y2+1:-0.68, y3+1:-0.23, y4+1:0.52, y5+1:0.64, y6+1:1.00, y7+2:0.47, y8+1:0.63, y9+1:0.95, y10+1:-1.91, y11+1:0.86, y11+1:-2.71, y12+1:0.45];[b3+1:-0.67, b4+1:-0.30, b5+1:0.76, b6+1:2.94, b7+1:1.79, b8+1:1.29, b8+1:1.15, b9+1:0.44, b9+1:0.94, b11+1:2.23, b11+1:1.23, b12+1:0.53, b13+1:0.40];[M16+2:1.03, M16+2:0.55]}{26372@}{26373@}{26374@[b2+1:-3.91];[y9+1:4.46, y10+1:-5.09]}{26375@[y9+1:5.…	{26370@[y2+1:35545, y3+1:36937, y4+1:88651, y5+1:159664, y6+1:46099, y7+2:80714, y8+1:959723, y9+1:250639, y10+1:19264, y11+1:28994, y11+1:27336, y12+1:19581];[b3+1:34297, b4+1:33364, b5+1:23884, b6+1:46863, b7+1:81448, b8+1:105374, b8+1:172475, b9+1:133931, b9+1:167906, b11+1:20392, b11+1:23753, b12+1:30110, b13+1:19158];[M16+2:392441, M16+2:707196]}{26372@}{26373@}{26374@[b2+1:1321];[y9+1:1487,…	{26370@27}{26372@0}{26373@0}{26374@3}{26375@2}		ApoA1	141	QKVAPLGEEFR	QKVAPLGEEFR(2)	1272.68	14.1051	{26370@[y2+1, y3+1, y4+1, y5+1, y6+1, y7+2, y8+2, y9+1];[b2+1, b3+1, b3+1, b4+1];[M11+2, M11+2]}{26372@[y8+1, y9+1]}{26373@[y8+1, y9+1]}{26374@}{26375@}	{26370@[y2+1:322.18726, y3+1:451.22968, y4+1:580.27228, y5+1:637.29447, y6+1:750.37803, y7+2:424.21918, y8+2:459.73808, y9+1:1017.53640];[b2+1:343.14332, b3+1:410.23983, b3+1:442.21241, b4+1:481.27742];[M11+2:664.35439, M11+2:680.34049]}{26372@[y8+1:918.46545, y9+1:1017.53214]}{26373@[y8+1:918.46535, y9+1:1017.53203]}{26374@}{26375@}	{26370@[y2+1:-0.00010, y3+1:-0.00028, y4+1:-0.00027, y5+1:0.00045, y6+1:-0.00005, y7+2:0.00024, y8+2:0.00093, y9+1:0.00003];[b2+1:-0.00013, b3+1:0.00004, b3+1:0.00054, b4+1:0.00051];[M11+2:0.00103, M11+2:0.00115]}{26372@[y8+1:-0.00251, y9+1:-0.00423]}{26373@[y8+1:-0.00261, y9+1:-0.00434]}{26374@}{26375@}	{26370@[y2+1:-0.32, y3+1:-0.62, y4+1:-0.47, y5+1:0.71, y6+1:-0.06, y7+2:0.28, y8+2:1.01, y9+1:0.03];[b2+1:-0.39, b3+1:0.11, b3+1:1.21, b4+1:1.07];[M11+2:0.78, M11+2:0.85]}{26372@[y8+1:-2.73, y9+1:-4.16]}{26373@[y8+1:-2.84, y9+1:-4.27]}{26374@}{26375@}	{26370@[y2+1:32608, y3+1:40661, y4+1:16938, y5+1:165065, y6+1:37073, y7+2:57292, y8+2:41643, y9+1:253555];[b2+1:20297, b3+1:38777, b3+1:22045, b4+1:25899];[M11+2:1172004, M11+2:479266]}{26372@[y8+1:4214, y9+1:2782]}{26373@[y8+1:1677, y9+1:1989]}{26374@}{26375@}	{26370@14}{26372@2}{26373@2}{26374@0}{26375@0}		41.2689	158.003	10	2;2	4	3	1
ApoA1	ApoA1	205	223	ApoA1ApoA1205223	K	K	1	W:\Collaboration_Services\Raw_files_FPL\Fusion Lumos\2021\Zheng\20211204_ZS_WP_SV_ns1_xlms\2022-01-21-16-12-41\Task1-Calibrate\20220119_ZS_WP_SV_Ns1Tsmut_R1-calib.mzML	15260	15253	776.644	4	3102.55	Intra	K;K		ApoA1	205	LEALKEGGGSLAEYHAK	LEALKEGGGSLAEYHAK(5)	1771.91	20.2235	{15260@[b2+1, b3+1, b5+1];[y4+1, y5+1, y6+1, y7+1, y8+1, y9+1, y10+1, y11+1, y12+1, y13+2, y13+2, y14+2, y15+2, y15+2, y16+2];[M17+2, M17+2]}{15261@[b2+1];[y11+1]}{15262@[b2+1];[y8+1, y11+1]}{15263@[b2+1, b6+1];[y8+1, y11+1]}{15264@[b2+1, b7+1];[y11+1]}	{15260@[b2+1:243.13363, b3+1:314.17085, b5+1:641.33168];[y4+1:518.27115, y5+1:647.31421, y6+1:718.35123, y7+1:831.43616, y8+1:918.46524, y9+1:975.48720, y10+1:1032.51032, y11+1:1089.53189, y12+1:1218.57483, y13+2:700.84402, y13+2:716.83020, y14+2:757.38484, y15+2:792.90408, y15+2:808.89039, y16+2:857.42349];[M17+2:913.96763, M17+2:929.95318]}{15261@[b2+1:243.13328];[y11+1:1089.53166]}{15262@[b2+1…	{15260@[b2+1:-0.00031, b3+1:-0.00020, b5+1:-0.00103];[y4+1:-0.00101, y5+1:-0.00054, y6+1:-0.00064, y7+1:0.00023, y8+1:-0.00272, y9+1:-0.00222, y10+1:-0.00056, y11+1:-0.00046, y12+1:-0.00011, y13+2:0.00030, y13+2:0.00058, y14+2:-0.00213, y15+2:-0.00076, y15+2:-0.00023, y16+2:-0.00453];[M17+2:-0.00031, M17+2:-0.00130]}{15261@[b2+1:-0.00065];[y11+1:-0.00069]}{15262@[b2+1:-0.00065];[y8+1:-0.00150, y1…	{15260@[b2+1:-1.27, b3+1:-0.64, b5+1:-1.62];[y4+1:-1.94, y5+1:-0.84, y6+1:-0.89, y7+1:0.28, y8+1:-2.96, y9+1:-2.28, y10+1:-0.54, y11+1:-0.42, y12+1:-0.09, y13+2:0.21, y13+2:0.41, y14+2:-1.41, y15+2:-0.48, y15+2:-0.14, y16+2:-2.65];[M17+2:-0.17, M17+2:-0.70]}{15261@[b2+1:-2.68];[y11+1:-0.64]}{15262@[b2+1:-2.68];[y8+1:-1.63, y11+1:-0.64]}{15263@[b2+1:-2.63, b6+1:-4.51];[y8+1:-1.54, y11+1:-0.54]}{15…	{15260@[b2+1:17102, b3+1:13127, b5+1:8381];[y4+1:13566, y5+1:34193, y6+1:70024, y7+1:16628, y8+1:13619, y9+1:9673, y10+1:11122, y11+1:33588, y12+1:24751, y13+2:18180, y13+2:21230, y14+2:16148, y15+2:82799, y15+2:77019, y16+2:14263];[M17+2:322914, M17+2:749721]}{15261@[b2+1:585];[y11+1:2390]}{15262@[b2+1:122];[y8+1:193, y11+1:593]}{15263@[b2+1:175, b6+1:85];[y8+1:234, y11+1:571]}{15264@[b2+1:180, …	{15260@20}{15261@2}{15262@3}{15263@4}{15264@3}		ApoA1	223	ASEQLKALGEK	ASEQLKALGEK(6)	1172.64	20.1117	{15260@[y3+1, y4+1, y5+1, y6+1, y6+1, y7+1, y7+1, y8+1, y8+1, y9+1];[b4+1, b5+1, b6+1, b6+1, b7+1, b8+1, b8+1, b10+1];[M11+1, M11+1]}{15261@}{15262@}{15263@}{15264@[y6+1]}	{15260@[y3+1:333.17699, y4+1:446.26097, y5+1:517.29849, y6+1:699.40335, y6+1:731.37350, y7+1:812.48728, y7+1:844.45970, y8+1:940.54525, y8+1:972.51815, y9+1:1069.58869];[b4+1:416.17763, b5+1:529.26300, b6+1:711.36713, b6+1:743.33728, b7+1:782.40636, b8+1:895.48690, b8+1:927.45913, b10+1:1081.54978];[M11+1:1227.65702, M11+1:1259.62899]}{15261@}{15262@}{15263@}{15264@[y6+1:699.39984]}	{15260@[y3+1:0.00013, y4+1:0.00005, y5+1:0.00045, y6+1:-0.00021, y6+1:-0.00214, y7+1:-0.00035, y7+1:-0.00001, y8+1:-0.00095, y8+1:-0.00014, y9+1:-0.00011];[b4+1:0.00004, b5+1:0.00135, b6+1:-0.00005, b6+1:-0.00198, b7+1:0.00207, b8+1:-0.00145, b8+1:-0.00130, b10+1:-0.00263];[M11+1:-0.00092, M11+1:-0.00103]}{15261@}{15262@}{15263@}{15264@[y6+1:-0.00372]}	{15260@[y3+1:0.40, y4+1:0.11, y5+1:0.87, y6+1:-0.30, y6+1:-2.93, y7+1:-0.43, y7+1:-0.01, y8+1:-1.01, y8+1:-0.14, y9+1:-0.10];[b4+1:0.11, b5+1:2.55, b6+1:-0.07, b6+1:-2.67, b7+1:2.65, b8+1:-1.62, b8+1:-1.40, b10+1:-2.44];[M11+1:-0.75, M11+1:-0.82]}{15261@}{15262@}{15263@}{15264@[y6+1:-5.33]}	{15260@[y3+1:80705, y4+1:41874, y5+1:93227, y6+1:67338, y6+1:27432, y7+1:47356, y7+1:11796, y8+1:26687, y8+1:11037, y9+1:8137];[b4+1:9153, b5+1:27825, b6+1:28784, b6+1:8666, b7+1:10587, b8+1:41014, b8+1:12491, b10+1:17717];[M11+1:138303, M11+1:73875]}{15261@}{15262@}{15263@}{15264@[y6+1:113]}	{15260@20}{15261@0}{15262@0}{15263@0}{15264@1}		40.3352	157.999	31	2;2	4	23	7
ApoA1	ApoA1	141	163	ApoA1ApoA1141163	K	K	1	W:\Collaboration_Services\Raw_files_FPL\Fusion Lumos\2021\Zheng\20211204_ZS_WP_SV_ns1_xlms\2022-01-21-16-12-41\Task1-Calibrate\20220119_ZS_WP_SV_Ns1Tsmut_R1-calib.mzML	26445	26443	825.435	4	3297.71	Intra	K;K		ApoA1	163	VQELQDKLSPLAQELR	VQELQDKLSPLAQELR(7)	1866.02	24.1748	{26445@[y2+1, y3+1, y4+1, y5+1, y6+1, y7+2, y8+1, y9+1, y11+1, y11+1, y12+1];[b3+1, b4+1, b5+1, b6+1, b7+1, b8+1, b8+1, b9+1, b9+1, b11+1, b12+1];[M16+2, M16+2]}{26446@}{26447@}{26448@[b2+1, b9+1];[y10+1]}{26449@[b2+1];[y9+1, y11+1, y13+1]}	{26445@[y2+1:288.20263, y3+1:417.24564, y4+1:545.30401, y5+1:616.34173, y6+1:729.42703, y7+2:413.74284, y8+1:913.51085, y9+1:1026.59550, y11+1:1323.72981, y11+1:1355.69477, y12+1:1483.76397];[b3+1:357.17641, b4+1:470.26080, b5+1:598.31932, b6+1:713.34839, b7+1:927.42588, b8+1:1008.53730, b8+1:1040.50941, b9+1:1095.56916, b9+1:1127.54184, b11+1:1337.67723, b12+1:1408.71527];[M16+2:961.02354, M16+2…	{26445@[y2+1:-0.00039, y3+1:0.00003, y4+1:-0.00018, y5+1:0.00042, y6+1:0.00166, y7+2:0.00028, y8+1:0.00070, y9+1:0.00128, y11+1:0.00312, y11+1:-0.00400, y12+1:0.00662];[b3+1:-0.00046, b4+1:-0.00012, b5+1:-0.00018, b6+1:0.00194, b7+1:0.00183, b8+1:0.00127, b8+1:0.00130, b9+1:0.00110, b9+1:0.00170, b11+1:0.00026, b12+1:0.00119];[M16+2:0.00090, M16+2:0.00080]}{26446@}{26447@}{26448@[b2+1:-0.00097, b…	{26445@[y2+1:-1.35, y3+1:0.08, y4+1:-0.33, y5+1:0.69, y6+1:2.28, y7+2:0.34, y8+1:0.76, y9+1:1.24, y11+1:2.36, y11+1:-2.95, y12+1:4.47];[b3+1:-1.28, b4+1:-0.26, b5+1:-0.31, b6+1:2.72, b7+1:1.97, b8+1:1.26, b8+1:1.25, b9+1:1.01, b9+1:1.51, b11+1:0.20, b12+1:0.84];[M16+2:0.47, M16+2:0.41]}{26446@}{26447@}{26448@[b2+1:-4.26, b9+1:-6.21];[y10+1:-5.49]}{26449@[b2+1:-4.25];[y9+1:4.07, y11+1:4.86, y13+1:…	{26445@[y2+1:20837, y3+1:14268, y4+1:34082, y5+1:68150, y6+1:20726, y7+2:29399, y8+1:355988, y9+1:109060, y11+1:10995, y11+1:12415, y12+1:8609];[b3+1:12978, b4+1:15271, b5+1:11774, b6+1:17430, b7+1:24887, b8+1:48594, b8+1:77865, b9+1:56492, b9+1:80126, b11+1:10800, b12+1:12335];[M16+2:149458, M16+2:294700]}{26446@}{26447@}{26448@[b2+1:134, b9+1:65];[y10+1:181]}{26449@[b2+1:45];[y9+1:308, y11+1:47…	{26445@24}{26446@0}{26447@0}{26448@3}{26449@4}		ApoA1	141	QKVAPLGEEFR	QKVAPLGEEFR(2)	1272.68	14.1179	{26445@[b2+1, b3+1, b4+1, b4+1];[y2+1, y3+1, y4+1, y5+1, y6+1, y7+2, y8+2, y9+1];[M11+2, M11+2]}{26446@[y8+1, y9+1]}{26447@[y8+1, y9+1]}{26448@}{26449@}	{26445@[b2+1:311.17171, b3+1:410.23936, b4+1:481.27731, b4+1:513.24951];[y2+1:322.18630, y3+1:451.22928, y4+1:580.27190, y5+1:637.29354, y6+1:750.37789, y7+2:424.21920, y8+2:459.73798, y9+1:1017.53562];[M11+2:664.35431, M11+2:680.34020]}{26446@[y8+1:918.46659, y9+1:1017.53181]}{26447@[y8+1:918.46507, y9+1:1017.53172]}{26448@}{26449@}	{26445@[b2+1:0.00034, b3+1:-0.00043, b4+1:0.00041, b4+1:0.00052];[y2+1:-0.00107, y3+1:-0.00068, y4+1:-0.00066, y5+1:-0.00047, y6+1:-0.00019, y7+2:0.00028, y8+2:0.00073, y9+1:-0.00075];[M11+2:0.00087, M11+2:0.00057]}{26446@[y8+1:-0.00136, y9+1:-0.00456]}{26447@[y8+1:-0.00289, y9+1:-0.00465]}{26448@}{26449@}	{26445@[b2+1:1.08, b3+1:-1.06, b4+1:0.85, b4+1:1.02];[y2+1:-3.33, y3+1:-1.51, y4+1:-1.13, y5+1:-0.74, y6+1:-0.25, y7+2:0.33, y8+2:0.80, y9+1:-0.74];[M11+2:0.66, M11+2:0.42]}{26446@[y8+1:-1.49, y9+1:-4.49]}{26447@[y8+1:-3.15, y9+1:-4.58]}{26448@}{26449@}	{26445@[b2+1:8300, b3+1:17480, b4+1:8866, b4+1:9707];[y2+1:9098, y3+1:11695, y4+1:7241, y5+1:49634, y6+1:11763, y7+2:23221, y8+2:15007, y9+1:87006];[M11+2:525654, M11+2:224929]}{26446@[y8+1:1056, y9+1:1167]}{26447@[y8+1:524, y9+1:385]}{26448@}{26449@}	{26445@14}{26446@2}{26447@2}{26448@0}{26449@0}		38.2926	159.008	6	2;2	4	2	1
[truncated: 160 more rows]
[truncated: 4 more columns]
