# Supplementary material for: Secreted dengue virus NS1 from infection is predominantly dimeric and in complex with high-density lipoprotein
Source: eLife. 2024 May 24;12:RP90762. doi: 10.7554/eLife.90762 (PMC11126310; doi:10.7554/eLife.90762)
Supplement: Supplementary file 3. [file elife-90762-supp3.xlsx]

## Sheet: Summary of tables
Summary of the sheets
No	Name of the sheet	Explanation
1	ApoA1_dimer_xlinks_dist	Crosslinks distances between C-alphas when the identfied links are mapped on ApoA1 dimer model
2	NS1_ApoA1_xlinks_dist	Intermolecular crosslinks distances between C-alphas when the identified links are mapped to the sNS1dimer:ApoA1dimer model	Residue 2	CA distance	Threshold	Sat-Viol
3	NS1_dimer_AF_xlinks_dist	Distances between the C-alpha when NS1:NS1 crosslinks are mapped to the Alphafold modelled NS1 dimer

## Sheet: ApoA1_dimer_xlinks_dist
Chain 1	Residue 1	Chain 2	Residue 2	CA distance	Threshold	Sat-Viol
X	82	Y	223	18.6	30	S
Y	82	X	223	18.5	30	S
X	82	X	223	43.1	30	V
Y	82	Y	223	42.8	30	V
X	82	Y	228	16.8	30	S
Y	82	X	228	16.6	30	S
X	82	X	228	39.3	30	V
Y	82	Y	228	39	30	V
X	119	X	141	34	30	V
Y	119	Y	141	34	30	V
X	119	Y	141	65.6	30	V
Y	119	X	141	65.5	30	V
X	119	X	130	17.8	30	S
Y	119	Y	130	17.8	30	S
X	119	Y	130	73.9	30	V
Y	119	X	130	73.8	30	V
X	130	X	141	16.7	30	S
Y	130	Y	141	16.7	30	S
X	130	Y	141	52.8	30	V
Y	130	X	141	52.8	30	V
X	130	Y	156	32.1	30	V
Y	130	X	156	32.1	30	V
X	130	X	156	37.5	30	V
Y	130	Y	156	37.5	30	V
X	141	Y	163	9.8	30	S
Y	141	X	163	9.8	30	S
X	141	X	163	33.2	30	V
Y	141	Y	163	33.2	30	V
X	141	Y	156	17.8	30	S
X	141	X	156	22.8	30	S
Y	141	Y	156	22.8	30	S
Y	141	X	156	17.8	30	S
X	141	X	261	21.9	30	S
Y	141	Y	261	21.8	30	S
X	141	Y	261	51.8	30	V
Y	141	X	261	52.4	30	V
X	141	X	259	21.7	30	S
Y	141	Y	259	21.9	30	S
X	141	Y	259	48.2	30	V
Y	141	X	259	48.8	30	V
X	141	X	223	63.9	30	V
Y	141	Y	223	64.3	30	V
X	141	Y	223	59.3	30	V
Y	141	X	223	59.2	30	V
X	156	Y	156	10.4	30	S
Y	156	X	156	10.4	30	S
X	156	X	156	0	30	S
Y	156	Y	156	0	30	S
X	156	Y	163	18.9	30	S
X	156	X	163	10.4	30	S
Y	156	Y	163	10.4	30	S
Y	156	X	163	18.9	30	S
X	156	Y	261	35.2	30	V
Y	156	X	261	35.6	30	V
X	156	X	261	37	30	V
Y	156	Y	261	36.5	30	V
X	163	Y	163	28.7	30	S
Y	163	X	163	28.7	30	S
X	163	X	163	0	30	S
Y	163	Y	163	0	30	S
X	205	Y	261	43.7	30	V
Y	205	X	261	43.2	30	V
X	205	X	261	65.5	30	V
Y	205	Y	261	65.2	30	V
X	214	X	228	20.2	30	S
Y	214	Y	228	20.2	30	S
X	214	Y	228	47.3	30	V
Y	214	X	228	47.2	30	V
X	223	X	261	52.5	30	V
Y	223	Y	261	52.4	30	V
X	223	Y	261	55.2	30	V
Y	223	X	261	55	30	V
X	223	X	230	10.4	30	S
Y	223	Y	230	10.3	30	S
X	223	Y	230	53.7	30	V
Y	223	X	230	53.7	30	V
X	223	Y	223	54.8	30	V
Y	223	X	223	54.8	30	V
X	223	X	223	0	30	S
Y	223	Y	223	0	30	S

## Sheet: NS1_ApoA1_xlinks_dist
Chain 1	Residue 1	Chain 2	Residue 2	CA distance	Threshold	Sat-Viol
A	2	X	170	44.5	30	V
A	2	Y	170	58.3	30	V
B	2	X	170	31.6	30	V
B	2	Y	170	53.5	30	V
A	7	Y	5	39.7	30	V
A	7	X	5	50.1	30	V
B	7	Y	5	46.9	30	V
B	7	X	5	60.9	30	V
A	9	X	165	25.3	30	S
A	9	Y	165	58.5	30	V
B	9	X	165	51.1	30	V
B	9	Y	165	63.5	30	V
A	9	X	203	37.7	30	V
A	9	Y	203	43.9	30	V
B	9	X	203	23.8	30	S
B	9	Y	203	47.6	30	V
A	11	X	71	48	30	V
A	11	Y	71	35.9	30	V
B	11	X	71	25.3	30	S
B	11	Y	71	47.5	30	V
A	11	X	165	25.8	30	S
A	11	Y	165	55.5	30	V
B	11	X	165	50.2	30	V
B	11	Y	165	59.2	30	V
A	11	X	172	26.1	30	S
A	11	Y	172	53.3	30	V
B	11	X	172	45.5	30	V
B	11	Y	172	59.6	30	V
A	11	X	203	39.2	30	V
A	11	Y	203	38.8	30	V
B	11	X	203	19.5	30	S
B	11	Y	203	47.3	30	V
A	38	X	105	43.3	30	V
A	38	Y	105	29.1	30	S
B	38	X	105	43.4	30	V
B	38	Y	105	63.1	30	V
A	40	X	5	87.2	30	V
A	40	Y	5	60.7	30	V
B	40	X	5	54.9	30	V
B	40	Y	5	58.9	30	V
A	40	X	83	23.7	30	S
A	40	Y	83	57	30	V
B	40	X	83	67.5	30	V
B	40	Y	83	47.6	30	V
A	40	X	71	24.9	30	S
A	40	Y	71	72.3	30	V
B	40	X	71	73.8	30	V
B	40	Y	71	40	30	V
A	69	X	83	27.9	30	S
A	69	Y	83	59.2	30	V
B	69	X	83	59	30	V
B	69	Y	83	33.4	30	V
A	94	X	83	40	30	V
A	94	Y	83	64.6	30	V
B	94	X	83	55.4	30	V
B	94	Y	83	30.2	30	V
A	120	X	59	30.5	30	V
A	120	Y	59	84.4	30	V
B	120	X	59	80.2	30	V
B	120	Y	59	21	30	S
A	120	X	203	20.9	30	S
A	120	Y	203	75.4	30	V
B	120	X	203	70.9	30	V
B	120	Y	203	39.6	30	V
A	94	X	152	68	30	V
A	94	Y	152	61.2	30	V
B	94	X	152	52.1	30	V
B	94	Y	152	86	30	V
A	112	X	83	26	30	S
A	112	Y	83	60.9	30	V
B	112	X	83	73.7	30	V
B	112	Y	83	52.8	30	V
A	112	X	71	27	30	S
A	112	Y	71	76.9	30	V
B	112	X	71	79.5	30	V
B	112	Y	71	43.4	30	V
A	116	X	147	87.8	30	V
A	116	Y	147	59.1	30	V
B	116	X	147	14.3	30	S
B	116	Y	147	81.1	30	V
A	116	X	83	23.2	30	S
A	116	Y	83	61.8	30	V
B	116	X	83	73.4	30	V
B	116	Y	83	49.2	30	V
A	116	X	203	24.7	30	S
A	116	Y	203	74.7	30	V
B	116	X	203	71.2	30	V
B	116	Y	203	43.6	30	V
A	116	X	61	33	30	V
A	116	Y	61	86.9	30	V
B	116	X	61	84.5	30	V
B	116	Y	61	22.8	30	S
A	116	X	59	35.1	30	V
A	116	Y	59	84.9	30	V
B	116	X	59	79.8	30	V
B	116	Y	59	24.4	30	S
A	122	X	61	25.6	30	S
A	122	Y	61	82.4	30	V
B	122	X	61	80.6	30	V
B	122	Y	61	15.6	30	S
					Total
					S	21

## Sheet: NS1_dimer_AF_xlinks_dist
Chain 1	Residue 1	Chain 2	Residue 2	CA distance	Threshold	Sat-Viol
B	2	A	9	10.4	30	S
B	2	B	9	19.9	30	S
B	2	A	14	10.4	30	S
B	2	B	14	10.3	30	S
B	9	A	214	28.8	30	S
B	9	B	214	18.4	30	S
B	9	A	181	15.2	30	S
B	9	B	181	29.4	30	S
B	11	A	11	28.9	30	S
B	11	B	11	0	30	S
B	11	A	116	31.9	30	V
B	11	B	116	59.4	30	V
B	14	A	189	19.5	30	S
B	14	B	189	14.3	30	S
B	38	A	170	58.9	30	V
B	38	B	170	8	30	S
B	40	A	112	81.1	30	V
B	40	B	112	6.9	30	S
B	40	A	116	83.5	30	V
B	40	B	116	14	30	S
B	40	A	113	79.6	30	V
B	40	B	113	6.4	30	S
B	41	A	11	25.5	30	S
B	41	B	11	51.4	30	V
B	44	A	112	82.8	30	V
B	44	B	112	9.2	30	S
B	48	A	112	84.3	30	V
B	48	B	112	14.4	30	S
B	48	A	116	88.1	30	V
B	48	B	116	23.8	30	S
B	69	A	94	63.5	30	V
B	69	B	94	14.6	30	S
B	69	A	101	64.6	30	V
B	69	B	101	21.4	30	S
B	69	A	87	76.4	30	V
B	69	B	87	13.2	30	S
B	72	A	204	38.7	30	V
B	72	B	204	39.7	30	V
B	72	A	116	81.4	30	V
B	72	B	116	17.2	30	S
B	87	A	113	85	30	V
B	87	B	113	16.2	30	S
B	101	A	109	67.6	30	V
B	101	B	109	24.3	30	S
B	101	A	112	73.2	30	V
B	101	B	112	28.7	30	S
B	101	A	113	72.8	30	V
B	101	B	113	29.4	30	S
B	101	A	116	78.5	30	V
B	101	B	116	36.1	30	V
B	112	A	122	83.2	30	V
B	112	B	122	16.7	30	S
B	116	A	120	89.2	30	V
B	116	B	120	6.4	30	S
B	317	A	317	51.4	30	V
B	317	B	317	0	30	S
