# Supplementary material for: Secreted dengue virus NS1 from infection is predominantly dimeric and in complex with high-density lipoprotein
Source: eLife. 2024 May 24;12:RP90762. doi: 10.7554/eLife.90762 (PMC11126310; doi:10.7554/eLife.90762)
Supplement: Supplementary file 4. [file elife-90762-supp4.xlsx]

## Sheet: denv
File Name	Scan Number	Precursor Scan Number	Precursor MZ	Precursor Charge	Precursor Mass	Cross Type	Link Residues	Peptide Info -->	Protein Accession	Protein Link Site	Beta Peptide Protein Accession	Beta Peptide Protein LinkSite	Beta Peptide Base Sequence	Beta Peptide Full Sequence	Beta Peptide Theoretical Mass	Beta Peptide Score	Beta Peptide Matched Ions	Beta Peptide Matched Ion Mass-To-Charge Ratios	Beta Peptide Matched Ion Mass Diff (Da)	Beta Peptide Matched Ion Mass Diff (Ppm)	Beta Peptide Matched Ion Intensities	Beta Peptide Matched Ion Counts	Summary Info -->	XL Total Score	Mass Diff (Da)	AlphaIndexingRank	Parent Ions	ParentIonsNum	AlphaParentIonMaxIntensityRank	BetaParentIonMaxIntensityRank	Decoy/Contaminant/Target	QValue	PEP	PEP_QValue	XL Total Score	Mass Diff (Da)	AlphaIndexingRank	Parent Ions	ParentIonsNum	AlphaParentIonMaxIntensityRank	BetaParentIonMaxIntensityRank	Decoy/Contaminant/Target	QValue	PEP	PEP_QValue
Z:\FPL_users\Raw_files_FPL\Eclipse\2023\Zheng\20230130_ZS_WP_xlms\20230116_Eclipse_ZS_WP_denv_rNS1_hdl_1_5_R1.raw	25605	25548	913.447	3	2737.32	Inter	K;K		NS1	116	ApoA1	69	QLNLKLLDNWDSVTSTFSKLR	QLNLKLLDNWDS[DSSO:DSSO_hydro_S on S]VTSTFSKLR(5)	2653.34	5.03312	{25605@[b11+1, b14+1];[y13+1, y20+3, y20+3]}{25608@[b4+1]}{25609@[y8+1]}{25610@[y11+1, y13+1, y17+1]}{25611@}	{25605@[b11+1:1407.70945, b14+1:1870.90031];[y13+1:1716.77327, y20+3:860.77227, y20+3:871.42892]}{25608@[b4+1:469.27200]}{25609@[y8+1:939.52633]}{25610@[y11+1:1416.67798, y13+1:1716.77788, y17+1:2272.06692]}{25611@}	{25605@[b11+1:-0.01723, b14+1:0.01120];[y13+1:-0.01647, y20+3:0.00088, y20+3:-0.00124]}{25608@[b4+1:-0.00491]}{25609@[y8+1:0.00053]}{25610@[y11+1:0.01049, y13+1:-0.01185, y17+1:0.00451]}{25611@}	{25605@[b11+1:-12.25, b14+1:5.99];[y13+1:-9.60, y20+3:0.34, y20+3:-0.48]}{25608@[b4+1:-10.48]}{25609@[y8+1:0.56]}{25610@[y11+1:7.41, y13+1:-6.91, y17+1:1.99]}{25611@}	{25605@[b11+1:163192, b14+1:37211];[y13+1:119796, y20+3:637763, y20+3:341452]}{25608@[b4+1:2307]}{25609@[y8+1:1180]}{25610@[y11+1:620, y13+1:1370, y17+1:600]}{25611@}	{25605@5}{25608@1}{25609@1}{25610@3}{25611@0}		29.2029	-2581.33	62	0;0	0	-	-	T	0	0	0	29.2029	-2581.33	62	0;0	0	-	-	T	0	0	0
Z:\FPL_users\Raw_files_FPL\Eclipse\2023\Zheng\20230130_ZS_WP_xlms\20230116_Eclipse_ZS_WP_denv_rNS1_hdl_1_5_R1.raw	25986	25927	762.632	4	3046.5	Intra	K;K		ApoA1	36	ApoA1	131	KWQEEMELYR	KWQEEM[Common Variable:Oxidation on M]ELYR(1)	1426.65	13.0739	{25986@[y1+3, y2+1, y3+1, y4+1, y5+1, y6+1, y7+1, y8+1, y8+2];[M10+1];[b2+1, b3+1, b9+1]}{25995@}{25996@}{25997@}{25998@}	{25986@[y1+3:59.04099, y2+1:338.18182, y3+1:451.26627, y4+1:580.30774, y5+1:727.34506, y6+1:856.38598, y7+1:985.42846, y8+1:1113.48664, y8+2:557.24608];[M10+1:1481.67149];[b2+1:401.16397, b3+1:529.22290, b9+1:1339.53125]}{25995@}{25996@}{25997@}{25998@}	{25986@[y1+3:-0.01055, y2+1:-0.00046, y3+1:-0.00008, y4+1:-0.00120, y5+1:0.00072, y6+1:-0.00095, y7+1:-0.00107, y8+1:-0.00146, y8+2:-0.00322];[M10+1:-0.00145];[b2+1:-0.00022, b3+1:0.00013, b9+1:-0.00209]}{25995@}{25996@}{25997@}{25998@}	{25986@[y1+3:-60.59, y2+1:-1.36, y3+1:-0.18, y4+1:-2.07, y5+1:1.00, y6+1:-1.11, y7+1:-1.08, y8+1:-1.32, y8+2:-2.89];[M10+1:-0.98];[b2+1:-0.55, b3+1:0.25, b9+1:-1.56]}{25995@}{25996@}{25997@}{25998@}	{25986@[y1+3:42434, y2+1:55097, y3+1:26068, y4+1:44778, y5+1:66219, y6+1:80409, y7+1:190983, y8+1:103963, y8+2:125866];[M10+1:42559];[b2+1:30020, b3+1:24350, b9+1:18767]}{25995@}{25996@}{25997@}{25998@}	{25986@13}{25995@0}{25996@0}{25997@0}{25998@0}		29.2127	157.998	19	1;1	2	37	16	T	0	0.012064	0.000181	25.3672	158	42	2;2	4	30	1	T	0	0	0
Z:\FPL_users\Raw_files_FPL\Eclipse\2023\Zheng\20230130_ZS_WP_xlms\20230116_Eclipse_ZS_WP_denv_rNS1_hdl_1_5_R1.raw	31128	31096	923.213	4	3688.82	Intra	K;S		ApoA1	47	ApoA1	82	LLDNWDSVTSTFSKLR	LLDNWDSVTSTFSKLR(13)	1880.96	12.1227	{31128@[y2+1, y4+1, y5+1, y7+1, y8+1, y10+1, y11+1];[b5+1, b6+1, b15+1];[M16+2, M16+2]}{31131@}{31132@[y8+1, y11+1];[b5+1, b8+1]}{31133@[y8+1, y11+1];[b5+1, b8+1]}{31134@[y11+1];[b5+1]}	{31128@[y2+1:288.20200, y4+1:557.33868, y5+1:704.40656, y7+1:892.48663, y8+1:993.53307, y10+1:1179.63098, y11+1:1294.65076];[b5+1:642.32349, b6+1:757.35266, b15+1:1793.83948];[M16+2:968.49114, M16+2:984.47731]}{31131@}{31132@[y8+1:993.53705, y11+1:1294.68103];[b5+1:642.30157, b8+1:943.44555]}{31133@[y8+1:993.52301, y11+1:1294.68005];[b5+1:642.30255, b8+1:943.45959]}{31134@[y11+1:1326.64502];[b5+1…	{31128@[y2+1:-0.00102, y4+1:-0.00188, y5+1:-0.00243, y7+1:-0.00206, y8+1:-0.00329, y10+1:-0.00583, y11+1:-0.01300];[b5+1:-0.00110, b6+1:0.00113, b15+1:-0.00199];[M16+2:-0.00606, M16+2:-0.00581]}{31131@}{31132@[y8+1:0.00068, y11+1:0.01728];[b5+1:-0.02302, b8+1:-0.00642]}{31133@[y8+1:-0.01336, y11+1:0.01630];[b5+1:-0.02204, b8+1:0.00762]}{31134@[y11+1:0.00919];[b5+1:-0.01461]}	{31128@[y2+1:-3.55, y4+1:-3.39, y5+1:-3.45, y7+1:-2.31, y8+1:-3.32, y10+1:-4.94, y11+1:-10.05];[b5+1:-1.72, b6+1:1.49, b15+1:-1.11];[M16+2:-3.13, M16+2:-2.95]}{31131@}{31132@[y8+1:0.69, y11+1:13.36];[b5+1:-35.89, b8+1:-6.81]}{31133@[y8+1:-13.46, y11+1:12.60];[b5+1:-34.37, b8+1:8.08]}{31134@[y11+1:6.93];[b5+1:-22.78]}	{31128@[y2+1:458896, y4+1:919051, y5+1:549608, y7+1:1118869, y8+1:1662610, y10+1:754862, y11+1:852468];[b5+1:774299, b6+1:515096, b15+1:627887];[M16+2:21281172, M16+2:33769740]}{31131@}{31132@[y8+1:166946, y11+1:57584];[b5+1:57584, b8+1:166946]}{31133@[y8+1:49726, y11+1:73137];[b5+1:73137, b8+1:49726]}{31134@[y11+1:6355];[b5+1:6355]}	{31128@12}{31131@0}{31132@4}{31133@4}{31134@2}		46.5401	157.997	38	2;2	4	82	11	T	0	0	0	29.2127	157.998	19	1;1	2	37	16	T	0	0.0120636	0.000181
Z:\FPL_users\Raw_files_FPL\Fusion Lumos\2023\Zheng\20230111_WP_sNS1_xlms\20230110_SZ_WP_DENV_rNS1_HDL_1_1_R1.raw	31233	31217	923.215	4	3688.83	Intra	K;S		ApoA1	47	ApoA1	82	LLDNWDSVTSTFSKLR	LLDNWDSVTSTFSKLR(13)	1880.96	17.104	{31233@[y2+1, y4+1, y5+1, y7+1, y8+1, y10+1, y11+1, y12+1, y14+1, y14+2];[b5+1, b6+1, b9+1, b12+1, b15+1];[M16+2, M16+2]}{31235@[b8+1];[y12+1, y14+1]}{31236@[y2+1, y5+1, y6+1, y8+1, y9+1, y11+1, y13+1, y14+1]}{31237@[b8+1]}{31238@}	{31233@[y2+1:288.20340, y4+1:557.34143, y5+1:704.40790, y7+1:892.48767, y8+1:993.53710, y10+1:1179.62964, y11+1:1294.66052, y12+1:1512.73450, y14+1:1709.80078, y14+2:871.39563];[b5+1:642.32501, b6+1:757.35428, b9+1:1044.50208, b12+1:1379.66992, b15+1:1793.84465];[M16+2:968.49369, M16+2:984.47968]}{31235@[b8+1:943.46662];[y12+1:1512.73325, y14+1:1741.79847]}{31236@[y2+1:288.20001, y5+1:704.40003, …	{31233@[y2+1:0.00038, y4+1:0.00086, y5+1:-0.00108, y7+1:-0.00102, y8+1:0.00073, y10+1:-0.00717, y11+1:-0.00323, y12+1:0.01935, y14+1:-0.01215, y14+2:-0.00103];[b5+1:0.00042, b6+1:0.00275, b9+1:0.00242, b12+1:0.02215, b15+1:0.00318];[M16+2:-0.00096, M16+2:-0.00105]}{31235@[b8+1:0.01464];[y12+1:0.01811, y14+1:0.01346]}{31236@[y2+1:-0.00301, y5+1:-0.00895, y6+1:0.01004, y8+1:-0.00443, y9+1:-0.00473,…	{31233@[y2+1:1.34, y4+1:1.55, y5+1:-1.54, y7+1:-1.14, y8+1:0.74, y10+1:-6.08, y11+1:-2.50, y12+1:12.80, y14+1:-7.11, y14+2:-0.59];[b5+1:0.66, b6+1:3.64, b9+1:2.32, b12+1:16.07, b15+1:1.77];[M16+2:-0.49, M16+2:-0.53]}{31235@[b8+1:15.54];[y12+1:11.98, y14+1:7.73]}{31236@[y2+1:-10.47, y5+1:-12.73, y6+1:12.48, y8+1:-4.46, y9+1:-4.33, y11+1:1.19, y13+1:8.84, y14+1:-7.52]}{31237@[b8+1:14.12]}{31238@}	{31233@[y2+1:280846, y4+1:372309, y5+1:397060, y7+1:704097, y8+1:912696, y10+1:300841, y11+1:419052, y12+1:311772, y14+1:316214, y14+2:504254];[b5+1:719113, b6+1:595102, b9+1:332283, b12+1:353568, b15+1:652218];[M16+2:17321516, M16+2:27996814]}{31235@[b8+1:12995];[y12+1:34690, y14+1:6051]}{31236@[y2+1:10144, y5+1:7280, y6+1:5875, y8+1:69241, y9+1:35352, y11+1:37823, y13+1:8752, y14+1:6292]}{31237…	{31233@17}{31235@3}{31236@8}{31237@1}{31238@0}		47.1843	158.005	40	2;2	4	45	123	T	0	0	0	46.5401	157.997	38	2;2	4	82	11	T	0	0	0
Z:\FPL_users\Raw_files_FPL\Fusion Lumos\2023\Zheng\20230111_WP_sNS1_xlms\20230110_SZ_WP_DENV_rNS1_HDL_1_1_R2.raw	31152	31139	923.215	4	3688.83	Intra	K;S		ApoA1	47	ApoA1	82	LLDNWDSVTSTFSKLR	LLDNWDSVTSTFSKLR(13)	1880.96	16.1018	{31152@[y2+1, y4+1, y5+1, y7+1, y8+1, y11+1, y14+1, y14+2];[b4+1, b5+1, b6+1, b9+1, b12+1, b14+1];[M16+2, M16+2]}{31154@[y2+1, y12+1, y14+1];[b3+1, b8+1]}{31155@[b5+1];[y6+1, y8+1, y9+1, y11+1, y12+1, y13+1, y14+1]}{31156@}{31157@}	{31152@[y2+1:288.20279, y4+1:557.34155, y5+1:704.41119, y7+1:892.48657, y8+1:993.53585, y11+1:1294.65784, y14+1:1709.80737, y14+2:871.39440];[b4+1:456.24442, b5+1:642.32414, b6+1:757.35248, b9+1:1044.51782, b12+1:1379.65637, b14+1:1680.76331];[M16+2:968.49428, M16+2:984.47955]}{31154@[y2+1:288.19999, y12+1:1512.73325, y14+1:1741.79990];[b3+1:342.19999, b8+1:943.46662]}{31155@[b5+1:642.33336];[y6+…	{31152@[y2+1:-0.00023, y4+1:0.00099, y5+1:0.00221, y7+1:-0.00212, y8+1:-0.00052, y11+1:-0.00592, y14+1:-0.00556, y14+2:-0.00350];[b4+1:-0.00086, b5+1:-0.00044, b6+1:0.00095, b9+1:0.01817, b12+1:0.00860, b14+1:0.00590];[M16+2:0.00022, M16+2:-0.00131]}{31154@[y2+1:-0.00303, y12+1:0.01811, y14+1:0.01489];[b3+1:-0.00236, b8+1:0.01464]}{31155@[b5+1:0.00877];[y6+1:0.00860, y8+1:-0.00443, y9+1:-0.00616,…	{31152@[y2+1:-0.79, y4+1:1.77, y5+1:3.15, y7+1:-2.37, y8+1:-0.52, y11+1:-4.57, y14+1:-3.26, y14+2:-2.01];[b4+1:-1.89, b5+1:-0.69, b6+1:1.25, b9+1:17.41, b12+1:6.24, b14+1:3.51];[M16+2:0.12, M16+2:-0.67]}{31154@[y2+1:-10.54, y12+1:11.98, y14+1:8.55];[b3+1:-6.92, b8+1:15.54]}{31155@[b5+1:13.68];[y6+1:10.69, y8+1:-4.46, y9+1:-5.65, y11+1:2.30, y12+1:-7.49, y13+1:7.94, y14+1:-8.36]}{31156@}{31157@}	{31152@[y2+1:35382, y4+1:29582, y5+1:30896, y7+1:59944, y8+1:87630, y11+1:53344, y14+1:39220, y14+2:38424];[b4+1:32565, b5+1:74174, b6+1:47411, b9+1:34003, b12+1:32516, b14+1:41786];[M16+2:1671726, M16+2:2633487]}{31154@[y2+1:5412, y12+1:3087, y14+1:699];[b3+1:1426, b8+1:2501]}{31155@[b5+1:625];[y6+1:543, y8+1:4321, y9+1:2175, y11+1:9416, y12+1:902, y13+1:1151, y14+1:688]}{31156@}{31157@}	{31152@16}{31154@5}{31155@8}{31156@0}{31157@0}		42.1732	158.004	44	2;2	4	53	3	T	0	0	0	47.1843	158.005	40	2;2	4	45	123	T	0	0	0
Z:\FPL_users\Raw_files_FPL\Eclipse\2023\Zheng\20230130_ZS_WP_xlms\20230116_Eclipse_ZS_WP_denv_rNS1_R1.raw	13957	13944	766.364	3	2296.07	Intra	K;K		NS1	9	NS1	101	GIMQAGKR	GIMQAGKR(7)	859.47	12.1168	{13957@[y3+1, y3+1, y4+1, y4+1, y5+1, y5+1, y6+1, y6+1];[b5+1, b5+2];[M8+1, M8+1]}{13959@[b5+1]}{13960@}{13961@}{13962@}	{13957@[y3+1:414.24527, y3+1:446.21664, y4+1:485.28217, y4+1:517.25403, y5+1:613.34045, y5+1:645.31305, y6+1:744.38043, y6+1:776.35266];[b5+1:501.24780, b5+2:251.12754];[M8+1:914.48614, M8+1:946.45883]}{13959@[b5+1:501.24701]}{13960@}{13961@}{13962@}	{13957@[y3+1:-0.00067, y3+1:-0.00137, y4+1:-0.00089, y4+1:-0.00110, y5+1:-0.00118, y5+1:-0.00066, y6+1:-0.00168, y6+1:-0.00153];[b5+1:-0.00118, b5+2:-0.00117];[M8+1:-0.00150, M8+1:-0.00090]}{13959@[b5+1:-0.00197]}{13960@}{13961@}{13962@}	{13957@[y3+1:-1.62, y3+1:-3.09, y4+1:-1.83, y4+1:-2.14, y5+1:-1.92, y5+1:-1.03, y6+1:-2.26, y6+1:-1.98];[b5+1:-2.35, b5+2:-2.34];[M8+1:-1.65, M8+1:-0.95]}{13959@[b5+1:-3.94]}{13960@}{13961@}{13962@}	{13957@[y3+1:16489, y3+1:6192, y4+1:16223, y4+1:7046, y5+1:15446, y5+1:5499, y6+1:14275, y6+1:5082];[b5+1:10834, b5+2:42641];[M8+1:214489, M8+1:44442]}{13959@[b5+1:73]}{13960@}{13961@}{13962@}	{13957@12}{13959@1}{13960@0}{13961@0}{13962@0}		35.3683	157.999	39	2;2	4	4	1	T	0	0	0	49.4458	157.999	13	2;2	4	9	39	T	0	0	0
Z:\FPL_users\Raw_files_FPL\Eclipse\2023\Zheng\20230130_ZS_WP_xlms\20230116_Eclipse_ZS_WP_denv_rNS1_hdl_1_5_R1.raw	26622	26539	919.795	3	2756.36	Intra	K;K		ApoA1	64	ApoA1	263	KLNTQ	KLNTQ(1)	602.339	8.12179	{26622@[b3+1, b3+1, b4+1, b4+1];[y2+2, y3+1];[M5+1, M5+1]}{26625@}{26626@}{26627@}{26628@}	{26622@[b3+1:410.23877, b3+1:442.21075, b4+1:511.28605, b4+1:543.25824];[y2+2:124.56436, y3+1:362.16620];[M5+1:657.35514, M5+1:689.32701]}{26625@}{26626@}{26627@}{26628@}	{26622@[b3+1:-0.00102, b3+1:-0.00112, b4+1:-0.00142, b4+1:-0.00131];[y2+2:-0.00265, y3+1:-0.00083];[M5+1:-0.00148, M5+1:-0.00168]}{26625@}{26626@}{26627@}{26628@}	{26622@[b3+1:-2.50, b3+1:-2.53, b4+1:-2.79, b4+1:-2.42];[y2+2:-10.73, y3+1:-2.29];[M5+1:-2.25, M5+1:-2.44]}{26625@}{26626@}{26627@}{26628@}	{26622@[b3+1:112301, b3+1:92710, b4+1:273318, b4+1:259245];[y2+2:378553, y3+1:119222];[M5+1:2590077, M5+1:2117264]}{26625@}{26626@}{26627@}{26628@}	{26622@8}{26625@0}{26626@0}{26627@0}{26628@0}		60.5992	157.999	7	2;2	4	15	25	T	0	0.006223	4.4e-05	42.1732	158.004	44	2;2	4	53	3	T	0	0	0
Z:\FPL_users\Raw_files_FPL\Eclipse\2023\Zheng\20230130_ZS_WP_xlms\20230116_Eclipse_ZS_WP_denv_rNS1_hdl_1_5_R1.raw	26967	26945	1016.51	4	4062	Intra	K;K		ApoA1	64	ApoA1	164	LHELQEKLSPLGEEMR	LHELQEKLSPLGEEMR(7)	1907.98	15.229	{26967@[y5+1, y7+1, y8+1, y9+1, y11+3, y11+3];[b6+1, b7+1, b7+1, b8+1, b8+1, b9+1, b9+1];[M16+2, M16+2]}{26970@[y7+1, y8+1, y9+1, y12+1, y13+1, y14+1];[b2+1, b3+1, b4+1, b7+1, b8+1, b9+1]}{26971@[y1+1, y12+1, y14+1];[b2+1, b4+1, b15+1]}{26972@}{26973@}	{26967@[y5+1:621.26489, y7+1:831.40118, y8+1:918.43469, y9+1:1031.51699, y11+3:448.21604, y11+3:458.87402];[b6+1:750.37592, b7+1:932.48120, b7+1:964.45483, b8+1:1045.56472, b8+1:1077.53771, b9+1:1132.59743, b9+1:1164.56705];[M16+2:981.99901, M16+2:997.98513]}{26970@[y7+1:831.40204, y8+1:918.41808, y9+1:1031.50903, y12+1:1470.71204, y13+1:1583.83109, y14+1:1712.85107];[b2+1:251.14793, b3+1:380.167…	{26967@[y5+1:-0.00119, y7+1:-0.00173, y8+1:-0.00025, y9+1:-0.00201, y11+3:-0.03355, y11+3:-0.03170];[b6+1:-0.00216, b7+1:-0.00240, b7+1:-0.00085, b8+1:-0.00294, b8+1:-0.00203, b9+1:-0.00226, b9+1:-0.00472];[M16+2:-0.00458, M16+2:-0.00443]}{26970@[y7+1:-0.00088, y8+1:-0.01686, y9+1:-0.00997, y12+1:-0.01366, y13+1:0.02133, y14+1:-0.00128];[b2+1:-0.00233, b3+1:-0.02494, b4+1:0.01005, b7+1:0.00636, b…	{26967@[y5+1:-1.93, y7+1:-2.08, y8+1:-0.27, y9+1:-1.95, y11+3:-25.00, y11+3:-23.07];[b6+1:-2.89, b7+1:-2.58, b7+1:-0.88, b8+1:-2.82, b8+1:-1.89, b9+1:-2.00, b9+1:-4.06];[M16+2:-2.34, M16+2:-2.22]}{26970@[y7+1:-1.06, y8+1:-18.38, y9+1:-9.68, y12+1:-9.30, y13+1:13.48, y14+1:-0.75];[b2+1:-9.30, b3+1:-65.77, b4+1:20.42, b7+1:6.83, b8+1:12.68, b9+1:-2.42]}{26971@[y1+1:-5.14, y12+1:-2.26, y14+1:15.83];…	{26967@[y5+1:52422, y7+1:309309, y8+1:208649, y9+1:55596, y11+3:294048, y11+3:113997];[b6+1:26646, b7+1:31290, b7+1:30741, b8+1:41924, b8+1:67565, b9+1:61298, b9+1:69002];[M16+2:1780263, M16+2:1959857]}{26970@[y7+1:4032, y8+1:3237, y9+1:6146, y12+1:3191, y13+1:1616, y14+1:4103];[b2+1:4103, b3+1:5061, b4+1:3191, b7+1:6146, b8+1:3963, b9+1:4032]}{26971@[y1+1:2941, y12+1:1088, y14+1:4759];[b2+1:4759…	{26967@15}{26970@12}{26971@6}{26972@0}{26973@0}		55.5152	157.993	7	2;2	4	13	26	T	0	0	0	60.5992	157.999	7	2;2	4	15	25	T	0	0.00622326	4.4e-05
Z:\FPL_users\Raw_files_FPL\Eclipse\2023\Zheng\20230130_ZS_WP_xlms\20230116_Eclipse_ZS_WP_denv_rNS1_R1.raw	12182	12165	689.998	3	2066.97	Intra	K;K		NS1	9	NS1	11	NKELK	NKELK(2)	630.37	6.155	{12182@[b2+1, b3+1, b4+1];[y2+2, y3+1];[M5+1]}{12184@}{12185@}{12186@}{12187@}	{12182@[b2+1:297.15521, b3+1:426.19760, b4+1:539.28149];[y2+2:130.59662, y3+1:389.23889];[M5+1:717.35916]}{12184@}{12185@}{12186@}{12187@}	{12182@[b2+1:-0.00051, b3+1:-0.00072, b4+1:-0.00089];[y2+2:-0.01090, y3+1:-0.00057];[M5+1:-0.00083]}{12184@}{12185@}{12186@}{12187@}	{12182@[b2+1:-1.74, b3+1:-1.69, b4+1:-1.65];[y2+2:-42.04, y3+1:-1.47];[M5+1:-1.16]}{12184@}{12185@}{12186@}{12187@}	{12182@[b2+1:55272, b3+1:107615, b4+1:82190];[y2+2:52918, y3+1:38794];[M5+1:2421106]}{12184@}{12185@}{12186@}{12187@}	{12182@6}{12184@0}{12185@0}{12186@0}{12187@0}		33.5795	157.999	44	1;1	2	33	17	T	0	0	0	46.4335	158	31	2;2	4	10	2	T	0	0	0
Z:\FPL_users\Raw_files_FPL\Eclipse\2023\Zheng\20230130_ZS_WP_xlms\20230116_Eclipse_ZS_WP_denv_rNS1_R1.raw	19216	19170	831.382	3	2491.12	Intra	K;K		NS1	9	NS1	116	YSWKTWGK	YSWKTWGK(4)	1054.52	9.11369	{19216@[y3+1, y4+1, y5+1, y5+1, y6+1, y6+1, y7+1];[M8+1, M8+1]}{19218@[y5+1]}{19219@}{19220@}{19221@}	{19216@[y3+1:390.21252, y4+1:491.26035, y5+1:673.36536, y5+1:705.34058, y6+1:859.44360, y6+1:891.41718, y7+1:978.44690];[M8+1:1109.53927, M8+1:1141.51094]}{19218@[y5+1:705.34218]}{19219@}{19220@}{19221@}	{19216@[y3+1:-0.00106, y4+1:-0.00091, y5+1:-0.00143, y5+1:0.00171, y6+1:-0.00250, y6+1:-0.00099, y7+1:-0.00330];[M8+1:-0.00218, M8+1:-0.00259]}{19218@[y5+1:0.00332]}{19219@}{19220@}{19221@}	{19216@[y3+1:-2.71, y4+1:-1.86, y5+1:-2.12, y5+1:2.43, y6+1:-2.91, y6+1:-1.11, y7+1:-3.38];[M8+1:-1.97, M8+1:-2.27]}{19218@[y5+1:4.71]}{19219@}{19220@}{19221@}	{19216@[y3+1:3838, y4+1:7268, y5+1:7304, y5+1:2476, y6+1:12765, y6+1:12932, y7+1:4657];[M8+1:82583, M8+1:90808]}{19218@[y5+1:29]}{19219@}{19220@}{19221@}	{19216@9}{19218@1}{19219@0}{19220@0}{19221@0}		31.2898	157.999	17	2;2	4	43	98	T	0	0	0	44.5364	157.999	6	2;2	4	29	57	T	0	0	0
Z:\FPL_users\Raw_files_FPL\Eclipse\2023\Zheng\20230130_ZS_WP_xlms\20230116_Eclipse_ZS_WP_denv_rNS1_R1.raw	13729	13715	709.671	3	2125.99	Intra	K;K		NS1	9	NS1	120	TWGKAK	TWGKAK(4)	689.386	6.18657	{13729@[b2+1, b2+2];[y4+1, y4+1];[M6+1, M6+1]}{13734@}{13735@[b4+1]}{13736@}{13737@}	{13729@[b2+1:288.13330, b2+2:144.57151];[y4+1:457.27608, y4+1:489.24820];[M6+1:744.40228, M6+1:776.37405]}{13734@}{13735@[b4+1:559.24005]}{13736@}{13737@}	{13729@[b2+1:-0.00097, b2+2:0.00147];[y4+1:-0.00083, y4+1:-0.00079];[M6+1:-0.00162, M6+1:-0.00193]}{13734@}{13735@[b4+1:0.00672]}{13736@}{13737@}	{13729@[b2+1:-3.37, b2+2:5.13];[y4+1:-1.81, y4+1:-1.61];[M6+1:-2.17, M6+1:-2.49]}{13734@}{13735@[b4+1:12.03]}{13736@}{13737@}	{13729@[b2+1:5649, b2+2:84505];[y4+1:11016, y4+1:6632];[M6+1:83381, M6+1:226084]}{13734@}{13735@[b4+1:69]}{13736@}{13737@}	{13729@6}{13734@0}{13735@1}{13736@0}{13737@0}		30.3993	158.002	32	2;2	4	28	18	T	0	0	0	42.3185	157.999	20	2;2	4	5	85	T	0	0	0
Z:\FPL_users\Raw_files_FPL\Eclipse\2023\Zheng\20230130_ZS_WP_xlms\20230116_Eclipse_ZS_WP_denv_rNS1_hdl_1_5_R1.raw	25670	25645	828.668	4	3310.64	Intra	K;K		ApoA1	64	ApoA1	206	LEALKENGGAR	LEALKENGGAR(5)	1156.62	15.0561	{25670@[b3+1, b4+1, b5+1, b7+1];[y4+1, y5+1, y6+1, y7+1, y7+1, y8+1, y8+1, y9+1, y9+1];[M11+1, M11+1]}{25679@[b2+1];[y9+1]}{25680@}{25681@[y9+1];[b2+1]}{25682@}	{25670@[b3+1:314.17001, b4+1:427.25330, b5+1:609.35901, b7+1:852.44751];[y4+1:360.19827, y5+1:474.24057, y6+1:603.28309, y7+1:785.38800, y7+1:817.36182, y8+1:898.47021, y8+1:930.44476, y9+1:969.50915, y9+1:1001.48275];[M11+1:1211.63474, M11+1:1243.60665]}{25679@[b2+1:243.13007];[y9+1:969.51193]}{25680@}{25681@[y9+1:1001.49402];[b2+1:243.12018]}{25682@}	{25670@[b3+1:-0.00103, b4+1:-0.00182, b5+1:-0.00163, b7+1:0.00135];[y4+1:-0.00072, y5+1:-0.00135, y6+1:-0.00142, y7+1:-0.00203, y7+1:-0.00030, y8+1:-0.00389, y8+1:-0.00142, y9+1:-0.00207, y9+1:-0.00055];[M11+1:-0.00313, M11+1:-0.00330]}{25679@[b2+1:-0.00387];[y9+1:0.00072]}{25680@}{25681@[y9+1:0.01072];[b2+1:-0.01375]}{25682@}	{25670@[b3+1:-3.30, b4+1:-4.26, b5+1:-2.67, b7+1:1.59];[y4+1:-2.01, y5+1:-2.85, y6+1:-2.36, y7+1:-2.59, y7+1:-0.37, y8+1:-4.33, y8+1:-1.53, y9+1:-2.14, y9+1:-0.55];[M11+1:-2.58, M11+1:-2.66]}{25679@[b2+1:-15.97];[y9+1:0.74]}{25680@}{25681@[y9+1:10.72];[b2+1:-56.80]}{25682@}	{25670@[b3+1:42981, b4+1:33793, b5+1:41227, b7+1:32724];[y4+1:33989, y5+1:101304, y6+1:228972, y7+1:130193, y7+1:65395, y8+1:67886, y8+1:47410, y9+1:119172, y9+1:54325];[M11+1:496580, M11+1:101093]}{25679@[b2+1:2081];[y9+1:2081]}{25680@}{25681@[y9+1:354];[b2+1:354]}{25682@}	{25670@15}{25679@2}{25680@0}{25681@2}{25682@0}		54.5598	157.996	9	2;2	4	19	7	T	0	0	0	55.5152	157.993	7	2;2	4	13	26	T	0	0	0
Z:\FPL_users\Raw_files_FPL\Eclipse\2023\Zheng\20230130_ZS_WP_xlms\20230116_Eclipse_ZS_WP_denv_rNS1_hdl_1_5_R1.raw	19097	19070	689.999	3	2066.97	Intra	K;K		NS1	9	NS1	11	NKELK	NKELK(2)	630.37	5.1461	{19097@[b2+1, b3+1, b4+1];[M5+1];[y2+2]}{19100@}{19101@}{19102@}{19103@}	{19097@[b2+1:297.15500, b3+1:426.19766, b4+1:539.28174];[M5+1:717.35925];[y2+2:130.59926]}{19100@}{19101@}{19102@}{19103@}	{19097@[b2+1:-0.00073, b3+1:-0.00066, b4+1:-0.00065];[M5+1:-0.00074];[y2+2:-0.00562]}{19100@}{19101@}{19102@}{19103@}	{19097@[b2+1:-2.46, b3+1:-1.55, b4+1:-1.20];[M5+1:-1.03];[y2+2:-21.70]}{19100@}{19101@}{19102@}{19103@}	{19097@[b2+1:166455, b3+1:293432, b4+1:240486];[M5+1:6888340];[y2+2:240505]}{19100@}{19101@}{19102@}{19103@}	{19097@5}{19100@0}{19101@0}{19102@0}{19103@0}		28.5803	158.001	42	1;1	2	5	15	T	0	0	0	40.6098	157.999	18	2;2	4	38	38	T	0	0	0
Z:\FPL_users\Raw_files_FPL\Eclipse\2023\Zheng\20230130_ZS_WP_xlms\20230116_Eclipse_ZS_WP_denv_rNS1_hdl_1_5_R1.raw	25550	25537	1008.52	3	3022.53	Intra	K;K		ApoA1	64	ApoA1	142	QKVEPLR	QKVEPLR(2)	868.513	6.1195	{25550@[y3+1, y3+2, y4+1, y5+1];[M7+1, M7+2]}{25555@}{25556@[y5+1];[b2+1]}{25557@}{25558@}	{25550@[y3+1:385.25494, y3+2:193.13320, y4+1:514.29787, y5+1:613.36552];[M7+1:923.52886, M7+2:478.25421]}{25555@}{25556@[y5+1:613.37604];[b2+1:343.13256]}{25557@}{25558@}	{25550@[y3+1:-0.00084, y3+2:0.00334, y4+1:-0.00050, y5+1:-0.00127];[M7+1:-0.00203, M7+2:-0.00182]}{25555@}{25556@[y5+1:0.00925];[b2+1:-0.01089]}{25557@}{25558@}	{25550@[y3+1:-2.18, y3+2:8.68, y4+1:-0.98, y5+1:-2.07];[M7+1:-2.20, M7+2:-1.91]}{25555@}{25556@[y5+1:15.11];[b2+1:-31.84]}{25557@}{25558@}	{25550@[y3+1:100837, y3+2:29738, y4+1:65418, y5+1:113429];[M7+1:679229, M7+2:132289]}{25555@}{25556@[y5+1:2235];[b2+1:2235]}{25557@}{25558@}	{25550@6}{25555@0}{25556@2}{25557@0}{25558@0}		49.3446	157.995	19	2;2	4	38	3	T	0	0	0	54.5598	157.997	9	2;2	4	19	7	T	0	0	0
Z:\FPL_users\Raw_files_FPL\Eclipse\2023\Zheng\20230130_ZS_WP_xlms\20230116_Eclipse_ZS_WP_denv_rNS1_hdl_1_5_R1.raw	26480	26447	896.177	4	3580.68	Intra	K;K		ApoA1	64	ApoA1	131	KWQEEMELYR	KWQEEM[Common Variable:Oxidation on M]ELYR(1)	1426.65	8.04583	{26480@[b2+1];[y2+1, y5+1, y6+1, y7+1, y8+1];[M10+1, M10+2]}{26485@}{26486@}{26487@}{26488@}	{26480@[b2+1:369.19138];[y2+1:338.18140, y5+1:727.34308, y6+1:856.38568, y7+1:985.42715, y8+1:1113.48584];[M10+1:1481.67012, M10+2:757.32431]}{26485@}{26486@}{26487@}{26488@}	{26480@[b2+1:-0.00074];[y2+1:-0.00088, y5+1:-0.00126, y6+1:-0.00125, y7+1:-0.00238, y8+1:-0.00226];[M10+1:-0.00282, M10+2:-0.00367]}{26485@}{26486@}{26487@}{26488@}	{26480@[b2+1:-2.00];[y2+1:-2.62, y5+1:-1.73, y6+1:-1.46, y7+1:-2.42, y8+1:-2.03];[M10+1:-1.90, M10+2:-2.42]}{26485@}{26486@}{26487@}{26488@}	{26480@[b2+1:100216];[y2+1:95944, y5+1:82423, y6+1:126576, y7+1:332978, y8+1:486331];[M10+1:592609, M10+2:1041263]}{26485@}{26486@}{26487@}{26488@}	{26480@8}{26485@0}{26486@0}{26487@0}{26488@0}		41.4462	157.998	5	2;2	4	21	11	T	0	0	0	49.3446	157.996	19	2;2	4	38	3	T	0	0	0
Z:\FPL_users\Raw_files_FPL\Eclipse\2023\Zheng\20230130_ZS_WP_xlms\20230116_Eclipse_ZS_WP_denv_rNS1_R1.raw	5819	5806	473.921	3	1418.74	Intra	K;K		NS1	11	NS1	11	NKELK	NKELK(2)	630.37	9.25123	{5819@[b2+1, b3+1, b4+1];[y2+1, y2+2, y3+1, y4+1];[M5+1, M5+1]}{5821@[y2+1, y3+1];[b2+1, b3+1]}{5822@[y1+1];[b4+1]}{5823@[y1+1]}{5824@}	{5819@[b2+1:297.15512, b3+1:426.19739, b4+1:539.28149];[y2+1:260.19629, y2+2:130.60166, y3+1:389.23874, y4+1:571.34412];[M5+1:685.38647, M5+1:717.35842]}{5821@[y2+1:260.20004, y3+1:389.24005];[b2+1:297.15415, b3+1:426.19416]}{5822@[y1+1:147.11404];[b4+1:571.25176]}{5823@[y1+1:147.11501]}{5824@}	{5819@[b2+1:-0.00061, b3+1:-0.00093, b4+1:-0.00089];[y2+1:-0.00058, y2+2:-0.00082, y3+1:-0.00072, y4+1:-0.00087];[M5+1:-0.00144, M5+1:-0.00157]}{5821@[y2+1:0.00317, y3+1:0.00059];[b2+1:-0.00158, b3+1:-0.00416]}{5822@[y1+1:0.00124];[b4+1:-0.00271]}{5823@[y1+1:0.00220]}{5824@}	{5819@[b2+1:-2.05, b3+1:-2.19, b4+1:-1.65];[y2+1:-2.23, y2+2:-3.18, y3+1:-1.86, y4+1:-1.52];[M5+1:-2.10, M5+1:-2.19]}{5821@[y2+1:12.25, y3+1:1.52];[b2+1:-5.33, b3+1:-9.79]}{5822@[y1+1:8.49];[b4+1:-4.75]}{5823@[y1+1:15.07]}{5824@}	{5819@[b2+1:72273, b3+1:64661, b4+1:35324];[y2+1:96728, y2+2:100648, y3+1:91734, y4+1:32139];[M5+1:413357, M5+1:955508]}{5821@[y2+1:2466, y3+1:886];[b2+1:886, b3+1:2466]}{5822@[y1+1:4001];[b4+1:4001]}{5823@[y1+1:722]}{5824@}	{5819@9}{5821@4}{5822@2}{5823@1}{5824@0}		18.5025	158.001	23	2;2	4	3	3	T	0.009901	0.008093	0.000122	38.3752	157.997	11	2;2	4	19	40	T	0	0	0
Z:\FPL_users\Raw_files_FPL\Eclipse\2023\Zheng\20230130_ZS_WP_xlms\20230116_Eclipse_ZS_WP_denv_rNS1_hdl_1_5_R1.raw	25575	25548	756.641	4	3022.54	Intra	K;K		ApoA1	64	ApoA1	142	QKVEPLR	QKVEPLR(2)	868.513	5.04339	{25575@[y3+1, y4+1, y5+1];[M7+1, M7+2]}{25578@[b1+1]}{25579@[y5+1];[b2+1]}{25580@}{25581@}	{25575@[y3+1:385.25454, y4+1:514.29699, y5+1:613.36549];[M7+1:923.52784, M7+2:478.25366]}{25578@[b1+1:129.06801]}{25579@[y5+1:613.37604];[b2+1:343.13176]}{25580@}{25581@}	{25575@[y3+1:-0.00124, y4+1:-0.00139, y5+1:-0.00130];[M7+1:-0.00305, M7+2:-0.00292]}{25578@[b1+1:0.00215]}{25579@[y5+1:0.00925];[b2+1:-0.01169]}{25580@}{25581@}	{25575@[y3+1:-3.22, y4+1:-2.70, y5+1:-2.12];[M7+1:-3.31, M7+2:-3.05]}{25578@[b1+1:16.82]}{25579@[y5+1:15.11];[b2+1:-34.18]}{25580@}{25581@}	{25575@[y3+1:624300, y4+1:637368, y5+1:586816];[M7+1:622368, M7+2:1262461]}{25578@[b1+1:2307]}{25579@[y5+1:5616];[b2+1:5616]}{25580@}{25581@}	{25575@5}{25578@1}{25579@2}{25580@0}{25581@0}		36.4368	157.996	6	2;2	4	10	7	T	0	0	0	41.4461	157.997	5	2;2	4	21	11	T	0	0	0
Z:\FPL_users\Raw_files_FPL\Eclipse\2023\Zheng\20230130_ZS_WP_xlms\20230116_Eclipse_ZS_WP_denv_rNS1_hdl_1_5_R1.raw	26968	26945	884.44	4	3533.73	Intra	K;K		ApoA1	64	ApoA1	130	VQPYLDDFQKK	VQPYLDDFQKK(10)	1379.71	7.40196	{26968@[y7+1, y7+1, y9+1, y9+1];[M11+1, M11+1];[b2+3]}{26974@}{26975@}{26976@}{26977@}	{26968@[y7+1:947.48077, y7+1:979.45630, y9+1:1207.59628, y9+1:1239.56802];[M11+1:1434.72319, M11+1:1466.70117];[b2+3:76.71687]}{26974@}{26975@}{26976@}{26977@}	{26968@[y7+1:-0.00249, y7+1:0.00095, y9+1:-0.00308, y9+1:-0.00342];[M11+1:-0.00316, M11+1:0.00274];[b2+3:0.00179]}{26974@}{26975@}{26976@}{26977@}	{26968@[y7+1:-2.64, y7+1:0.97, y9+1:-2.56, y9+1:-2.76];[M11+1:-2.20, M11+1:1.87];[b2+3:7.89]}{26974@}{26975@}{26976@}{26977@}	{26968@[y7+1:29604, y7+1:50955, y9+1:512597, y9+1:556702];[M11+1:108599, M11+1:119974];[b2+3:8021077]}{26974@}{26975@}{26976@}{26977@}	{26968@7}{26974@0}{26975@0}{26976@0}{26977@0}		32.5984	157.997	5	2;2	4	20	29	T	0	0	0	36.4368	157.996	6	2;2	4	10	7	T	0	0	0
Z:\FPL_users\Raw_files_FPL\Eclipse\2023\Zheng\20230130_ZS_WP_xlms\20230116_Eclipse_ZS_WP_denv_rNS1_R1.raw	15024	15004	605.568	4	2418.24	Intra	K;K		NS1	41	NS1	11	NKELK	NKELK(2)	630.37	5.07465	{15024@[y2+1, y3+1];[M5+1, M5+1];[b4+1]}{15026@}{15027@}{15028@}{15029@}	{15024@[y2+1:260.19620, y3+1:389.23831];[M5+1:685.38631, M5+1:717.35788];[b4+1:571.25012]}{15026@}{15027@}{15028@}{15029@}	{15024@[y2+1:-0.00067, y3+1:-0.00115];[M5+1:-0.00160, M5+1:-0.00211];[b4+1:-0.00434]}{15026@}{15027@}{15028@}{15029@}	{15024@[y2+1:-2.59, y3+1:-2.96];[M5+1:-2.34, M5+1:-2.95];[b4+1:-7.61]}{15026@}{15027@}{15028@}{15029@}	{15024@[y2+1:33225, y3+1:32421];[M5+1:208701, M5+1:1047998];[b4+1:26604]}{15026@}{15027@}{15028@}{15029@}	{15024@5}{15026@0}{15027@0}{15028@0}{15029@0}		29.4122	157.998	11	2;2	4	30	29	T	0	0	0	37.3929	157.998	3	2;2	4	3	15	T	0	0	0
Z:\FPL_users\Raw_files_FPL\Fusion Lumos\2023\Zheng\20230111_WP_sNS1_xlms\20230110_SZ_WP_DENV_rNS1_HDL_1_1_R1.raw	23930	23790	919.798	3	2756.37	Intra	K;K		ApoA1	64	ApoA1	263	KLNTQ	KLNTQ(1)	602.339	8.10742	{23930@[b2+1, b3+1, b3+1, b4+1, b4+1];[y3+1];[M5+1, M5+1]}{23933@}{23934@}{23935@[b4+1]}{23936@}	{23930@[b2+1:296.19739, b3+1:410.24036, b3+1:442.21167, b4+1:511.28820, b4+1:543.25964];[y3+1:362.16690];[M5+1:657.35703, M5+1:689.32897]}{23933@}{23934@}{23935@[b4+1:543.26669]}{23936@}	{23930@[b2+1:0.00052, b3+1:0.00057, b3+1:-0.00020, b4+1:0.00073, b4+1:0.00009];[y3+1:-0.00012];[M5+1:0.00042, M5+1:0.00027]}{23933@}{23934@}{23935@[b4+1:0.00714]}{23936@}	{23930@[b2+1:1.78, b3+1:1.38, b3+1:-0.46, b4+1:1.43, b4+1:0.17];[y3+1:-0.34];[M5+1:0.63, M5+1:0.40]}{23933@}{23934@}{23935@[b4+1:13.17]}{23936@}	{23930@[b2+1:26507, b3+1:97397, b3+1:47430, b4+1:222474, b4+1:208619];[y3+1:70203];[M5+1:2520115, M5+1:2052393]}{23933@}{23934@}{23935@[b4+1:886]}{23936@}	{23930@8}{23933@0}{23934@0}{23935@1}{23936@0}		56.2925	158.008	48	2;2	4	2	4	T	0	5.96e-08	0	32.5985	157.997	5	2;2	4	20	29	T	0	0	0
Z:\FPL_users\Raw_files_FPL\Fusion Lumos\2023\Zheng\20230111_WP_sNS1_xlms\20230110_SZ_WP_DENV_rNS1_HDL_1_1_R2.raw	23803	23716	919.797	3	2756.37	Intra	K;K		ApoA1	64	ApoA1	263	KLNTQ	KLNTQ(1)	602.339	8.1128	{23803@[b2+1, b3+1, b3+1, b4+1, b4+1];[y3+1];[M5+1, M5+1]}{23806@}{23807@}{23808@}{23809@}	{23803@[b2+1:328.16962, b3+1:410.23953, b3+1:442.21170, b4+1:511.28751, b4+1:543.25986];[y3+1:362.16681];[M5+1:657.35666, M5+1:689.32848]}{23806@}{23807@}{23808@}{23809@}	{23803@[b2+1:0.00067, b3+1:-0.00026, b3+1:-0.00017, b4+1:0.00004, b4+1:0.00031];[y3+1:-0.00022];[M5+1:0.00005, M5+1:-0.00021]}{23806@}{23807@}{23808@}{23809@}	{23803@[b2+1:2.06, b3+1:-0.63, b3+1:-0.39, b4+1:0.08, b4+1:0.56];[y3+1:-0.60];[M5+1:0.08, M5+1:-0.31]}{23806@}{23807@}{23808@}{23809@}	{23803@[b2+1:38450, b3+1:128743, b3+1:105921, b4+1:341259, b4+1:276494];[y3+1:87839];[M5+1:3712532, M5+1:3023876]}{23806@}{23807@}{23808@}{23809@}	{23803@8}{23806@0}{23807@0}{23808@0}{23809@0}		54.3009	158.004	39	2;2	4	3	4	T	0	4.17e-07	0	56.2925	158.008	48	2;2	4	2	4	T	0	5.96046e-08	0
Z:\FPL_users\Raw_files_FPL\Eclipse\2023\Zheng\20230130_ZS_WP_xlms\20230116_Eclipse_ZS_WP_denv_rNS1_R1.raw	13891	13870	540.877	5	2699.35	Intra	K;K		NS1	48	NS1	122	TWGKAK	TWGKAK(6)	689.386	7.09874	{13891@[b2+1, b2+4];[y4+1, y4+1, y5+1];[M6+1, M6+1]}{13893@}{13894@}{13895@}{13896@[y5+1]}	{13891@[b2+1:288.13391, b2+4:72.78900];[y4+1:457.27626, y4+1:489.24808, y5+1:643.35596];[M6+1:744.40260, M6+1:776.37440]}{13893@}{13894@}{13895@}{13896@[y5+1:675.34003]}	{13891@[b2+1:-0.00036, b2+4:-0.00010];[y4+1:-0.00064, y4+1:-0.00090, y5+1:-0.00026];[M6+1:-0.00129, M6+1:-0.00158]}{13893@}{13894@}{13895@}{13896@[y5+1:0.01173]}	{13891@[b2+1:-1.24, b2+4:-0.35];[y4+1:-1.41, y4+1:-1.85, y5+1:-0.41];[M6+1:-1.74, M6+1:-2.04]}{13893@}{13894@}{13895@}{13896@[y5+1:17.39]}	{13891@[b2+1:93585, b2+4:217075];[y4+1:205127, y4+1:62322, y5+1:14592];[M6+1:34441, M6+1:174569]}{13893@}{13894@}{13895@}{13896@[y5+1:127]}	{13891@7}{13893@0}{13894@0}{13895@0}{13896@1}		37.3929	157.998	3	2;2	4	3	15	T	0	0	0	35.3683	157.999	39	2;2	4	4	1	T	0	0	0
Z:\FPL_users\Raw_files_FPL\Fusion Lumos\2023\Zheng\20230111_WP_sNS1_xlms\20230110_SZ_WP_DENV_rNS1_HDL_1_1_R1.raw	23561	23458	772.39	4	3085.53	Intra	K;K		ApoA1	64	ApoA1	120	DLEEVKAK	DLEEVKAK(8)	930.502	15.059	{23561@[b2+1, b3+1, b4+1, b5+1];[y1+1, y3+1, y3+1, y4+1, y4+1, y5+1, y5+1, y6+1, y6+1];[M8+1, M8+1]}{23566@}{23567@}{23568@}{23569@}	{23561@[b2+1:229.11821, b3+1:358.16031, b4+1:487.20272, b5+1:586.27161];[y1+1:233.09203, y3+1:400.25491, y3+1:432.22589, y4+1:499.32419, y4+1:531.29547, y5+1:628.36643, y5+1:660.33783, y6+1:757.40726, y6+1:789.37915];[M8+1:985.51999, M8+1:1017.49167]}{23566@}{23567@}{23568@}{23569@}	{23561@[b2+1:-0.00007, b3+1:-0.00057, b4+1:-0.00075, b5+1:-0.00028];[y1+1:-0.00342, y3+1:-0.00053, y3+1:-0.00163, y4+1:0.00033, y4+1:-0.00046, y5+1:-0.00001, y5+1:-0.00070, y6+1:-0.00178, y6+1:-0.00197];[M8+1:-0.00006, M8+1:-0.00045]}{23566@}{23567@}{23568@}{23569@}	{23561@[b2+1:-0.32, b3+1:-1.59, b4+1:-1.54, b5+1:-0.47];[y1+1:-14.73, y3+1:-1.32, y3+1:-3.78, y4+1:0.67, y4+1:-0.87, y5+1:-0.02, y5+1:-1.06, y6+1:-2.35, y6+1:-2.50];[M8+1:-0.06, M8+1:-0.45]}{23566@}{23567@}{23568@}{23569@}	{23561@[b2+1:6106, b3+1:11317, b4+1:10125, b5+1:11469];[y1+1:4037, y3+1:12761, y3+1:6891, y4+1:13073, y4+1:7605, y5+1:25118, y5+1:20770, y6+1:62514, y6+1:24713];[M8+1:182385, M8+1:284564]}{23566@}{23567@}{23568@}{23569@}	{23561@15}{23566@0}{23567@0}{23568@0}{23569@0}		48.156	159.003	17	2;2	4	34	104	T	0	4.65e-06	0	54.3009	158.004	39	2;2	4	3	4	T	0	4.17233e-07	0
Z:\FPL_users\Raw_files_FPL\Fusion Lumos\2023\Zheng\20230111_WP_sNS1_xlms\20230110_SZ_WP_DENV_rNS1_HDL_1_1_R1.raw	21865	21773	756.644	4	3022.55	Intra	K;K		ApoA1	64	ApoA1	142	QKVEPLR	QKVEPLR(2)	868.513	6.05925	{21865@[b2+1];[y3+1, y4+1, y5+1];[M7+2, M7+2]}{21872@[y6+1]}{21873@[y2+1]}{21874@}{21875@}	{21865@[b2+1:311.17212];[y3+1:385.25605, y4+1:514.29900, y5+1:613.36686];[M7+2:462.26935, M7+2:478.25513]}{21872@[y6+1:795.46670]}{21873@[y2+1:288.20001]}{21874@}{21875@}	{21865@[b2+1:0.00074];[y3+1:0.00027, y4+1:0.00063, y5+1:0.00007];[M7+2:0.00054, M7+2:0.00001]}{21872@[y6+1:-0.00561]}{21873@[y2+1:-0.00301]}{21874@}{21875@}	{21865@[b2+1:2.39];[y3+1:0.71, y4+1:1.22, y5+1:0.12];[M7+2:0.58, M7+2:0.01]}{21872@[y6+1:-7.06]}{21873@[y2+1:-10.47]}{21874@}{21875@}	{21865@[b2+1:18372];[y3+1:280128, y4+1:176856, y5+1:226577];[M7+2:1093257, M7+2:433477]}{21872@[y6+1:430]}{21873@[y2+1:292]}{21874@}{21875@}	{21865@6}{21872@1}{21873@1}{21874@0}{21875@0}		42.1511	158.007	13	2;2	4	37	3	T	0	0.319316	0.006253	48.156	159.003	17	2;2	4	34	104	T	0	4.64916e-06	0
Z:\FPL_users\Raw_files_FPL\Fusion Lumos\2023\Zheng\20230111_WP_sNS1_xlms\20230110_SZ_WP_DENV_rNS1_HDL_1_1_R2.raw	23825	23716	919.797	3	2756.37	Intra	K;K		ApoA1	64	ApoA1	263	KLNTQ	KLNTQ(1)	602.339	9.07609	{23825@[b2+1, b2+1, b3+1, b3+1, b4+1, b4+1];[y3+1];[M5+1, M5+1]}{23828@}{23829@}{23830@}{23831@}	{23825@[b2+1:296.19714, b2+1:328.16830, b3+1:410.24002, b3+1:442.21323, b4+1:511.28760, b4+1:543.25931];[y3+1:362.16531];[M5+1:657.35644, M5+1:689.32851]}{23828@}{23829@}{23830@}{23831@}	{23825@[b2+1:0.00028, b2+1:-0.00064, b3+1:0.00023, b3+1:0.00136, b4+1:0.00013, b4+1:-0.00024];[y3+1:-0.00171];[M5+1:-0.00018, M5+1:-0.00018]}{23828@}{23829@}{23830@}{23831@}	{23825@[b2+1:0.95, b2+1:-1.95, b3+1:0.56, b3+1:3.07, b4+1:0.26, b4+1:-0.45];[y3+1:-4.74];[M5+1:-0.27, M5+1:-0.27]}{23828@}{23829@}{23830@}{23831@}	{23825@[b2+1:13341, b2+1:14638, b3+1:48332, b3+1:24746, b4+1:91010, b4+1:66387];[y3+1:20603];[M5+1:1087576, M5+1:745149]}{23828@}{23829@}{23830@}{23831@}	{23825@9}{23828@0}{23829@0}{23830@0}{23831@0}		40.1328	158.004	25	0;2	2	-	16	T	0	0.79484	0.022934	42.1511	158.007	13	2;2	4	37	3	T	0	0.319316	0.006253
Z:\FPL_users\Raw_files_FPL\Eclipse\2023\Zheng\20230130_ZS_WP_xlms\20230116_Eclipse_ZS_WP_denv_rNS1_R1.raw	17609	17547	613.904	5	3064.48	Intra	K;K		NS1	48	NS1	116	YSWKTWGK	YSWKTWGK(4)	1054.52	12.1168	{17609@[b2+1, b2+4, b7+1];[y3+1, y4+1, y5+1, y5+1, y6+1, y6+1, y7+1];[M8+2, M8+1]}{17614@}{17615@[y5+1];[b3+1]}{17616@}{17617@}	{17609@[b2+1:251.10196, b2+4:63.53024, b7+1:963.42108];[y3+1:390.21307, y4+1:491.26016, y5+1:673.36841, y5+1:705.35205, y6+1:859.44433, y6+1:891.41732, y7+1:946.47839];[M8+2:555.27327, M8+1:1141.51164]}{17614@}{17615@[y5+1:705.34503];[b3+1:437.17397]}{17616@}{17617@}	{17609@[b2+1:-0.00067, b2+4:-0.00351, b7+1:-0.01484];[y3+1:-0.00051, y4+1:-0.00110, y5+1:0.00163, y5+1:0.01319, y6+1:-0.00177, y6+1:-0.00085, y7+1:0.00027];[M8+2:-0.00219, M8+1:-0.00189]}{17614@}{17615@[y5+1:0.00617];[b3+1:-0.00798]}{17616@}{17617@}	{17609@[b2+1:-2.70, b2+4:-14.05, b7+1:-15.42];[y3+1:-1.30, y4+1:-2.24, y5+1:2.42, y5+1:18.72, y6+1:-2.06, y6+1:-0.96, y7+1:0.29];[M8+2:-1.97, M8+1:-1.66]}{17614@}{17615@[y5+1:8.76];[b3+1:-18.29]}{17616@}{17617@}	{17609@[b2+1:2763, b2+4:9107, b7+1:1647];[y3+1:2324, y4+1:5377, y5+1:3431, y5+1:3993, y6+1:7427, y6+1:4411, y7+1:2665];[M8+2:145405, M8+1:2479]}{17614@}{17615@[y5+1:75];[b3+1:75]}{17616@}{17617@}	{17609@12}{17614@0}{17615@2}{17616@0}{17617@0}		30.3579	157.995	21	2;2	4	5	38	T	0	0.007882	8.3e-05	33.5795	157.999	44	1;1	2	33	17	T	0	0	0
Z:\FPL_users\Raw_files_FPL\Eclipse\2023\Zheng\20230130_ZS_WP_xlms\20230116_Eclipse_ZS_WP_denv_rNS1_R1.raw	24102	24046	723.113	4	2888.42	Intra	K;K		NS1	94	NS1	116	YSWKTWGK	YSWKTWGK(4)	1054.52	12.0683	{24102@[b2+1, b4+1];[y3+1, y4+1, y5+1, y5+1, y6+1, y6+1, y7+1, y7+1];[M8+1, M8+1]}{24107@[y4+1, y6+1];[b4+1]}{24108@}{24109@}{24110@[b7+1]}	{24102@[b2+1:251.10161, b4+1:619.28577];[y3+1:390.21255, y4+1:491.26026, y5+1:673.36458, y5+1:705.33380, y6+1:859.44417, y6+1:891.41766, y7+1:946.47766, y7+1:978.44784];[M8+1:1109.53894, M8+1:1141.51052]}{24107@[y4+1:491.25900, y6+1:859.44999];[b4+1:619.28700]}{24108@}{24109@}{24110@[b7+1:963.44922]}	{24102@[b2+1:-0.00103, b4+1:-0.00170];[y3+1:-0.00103, y4+1:-0.00100, y5+1:-0.00220, y5+1:-0.00506, y6+1:-0.00193, y6+1:-0.00051, y7+1:-0.00046, y7+1:-0.00237];[M8+1:-0.00252, M8+1:-0.00302]}{24107@[y4+1:-0.00226, y6+1:0.00390];[b4+1:-0.00047]}{24108@}{24109@}{24110@[b7+1:0.01329]}	{24102@[b2+1:-4.10, b4+1:-2.75];[y3+1:-2.64, y4+1:-2.04, y5+1:-3.28, y5+1:-7.19, y6+1:-2.24, y6+1:-0.57, y7+1:-0.49, y7+1:-2.42];[M8+1:-2.27, M8+1:-2.64]}{24107@[y4+1:-4.60, y6+1:4.54];[b4+1:-0.76]}{24108@}{24109@}{24110@[b7+1:13.81]}	{24102@[b2+1:4222, b4+1:6881];[y3+1:7393, y4+1:21493, y5+1:15226, y5+1:6652, y6+1:37889, y6+1:23298, y7+1:15589, y7+1:8952];[M8+1:74911, M8+1:73125]}{24107@[y4+1:815, y6+1:207];[b4+1:815]}{24108@}{24109@}{24110@[b7+1:21]}	{24102@12}{24107@3}{24108@0}{24109@0}{24110@1}		49.4458	157.999	13	2;2	4	9	39	T	0	0	0	33.4012	157.997	61	2;2	4	51	36	T	0	0	0
Z:\FPL_users\Raw_files_FPL\Eclipse\2023\Zheng\20230130_ZS_WP_xlms\20230116_Eclipse_ZS_WP_denv_rNS1_hdl_1_5_R1.raw	28818	28785	1051.49	4	4201.92	Intra	K;K		ApoA1	101	ApoA1	131	KWQEEMELYR	KWQEEM[Common Variable:Oxidation on M]ELYR(1)	1426.65	10.0478	{28818@[y3+1, y4+1, y5+1, y6+1, y7+1, y8+1, y9+1];[b9+1];[M10+1, M10+1]}{28823@}{28824@}{28825@}{28826@}	{28818@[y3+1:451.26498, y4+1:580.30725, y5+1:727.34235, y6+1:856.38534, y7+1:985.42904, y8+1:1113.48596, y9+1:1299.56531];[b9+1:1307.55750];[M10+1:1481.67002, M10+1:1513.64343]}{28823@}{28824@}{28825@}{28826@}	{28818@[y3+1:-0.00136, y4+1:-0.00169, y5+1:-0.00199, y6+1:-0.00159, y7+1:-0.00049, y8+1:-0.00214, y9+1:-0.00211];[b9+1:-0.00377];[M10+1:-0.00292, M10+1:-0.00158]}{28823@}{28824@}{28825@}{28826@}	{28818@[y3+1:-3.02, y4+1:-2.91, y5+1:-2.74, y6+1:-1.86, y7+1:-0.49, y8+1:-1.92, y9+1:-1.62];[b9+1:-2.88];[M10+1:-1.97, M10+1:-1.05]}{28823@}{28824@}{28825@}{28826@}	{28818@[y3+1:25204, y4+1:25739, y5+1:39824, y6+1:71530, y7+1:127020, y8+1:252624, y9+1:26875];[b9+1:29633];[M10+1:511828, M10+1:29348]}{28823@}{28824@}{28825@}{28826@}	{28818@10}{28823@0}{28824@0}{28825@0}{28826@0}		36.3987	157.997	9	2;2	4	25	8	T	0	0	0	40.1328	158.004	25	0;2	2	-	16	T	0	0.79484	0.022934
Z:\FPL_users\Raw_files_FPL\Eclipse\2023\Zheng\20230130_ZS_WP_xlms\20230116_Eclipse_ZS_WP_denv_rNS1_hdl_1_5_R1.raw	28798	28739	947.716	4	3786.83	Intra	K;K		ApoA1	101	ApoA1	232	AKPALEDLR	AKPALEDLR(2)	1011.57	4.07729	{28798@[y5+1, y7+1];[M9+1, M9+1]}{28807@}{28808@}{28809@}{28810@}	{28798@[y5+1:645.35614, y7+1:813.44604];[M9+1:1066.58811, M9+1:1098.56042]}{28807@}{28808@}{28809@}{28810@}	{28798@[y5+1:-0.00048, y7+1:-0.00045];[M9+1:-0.00102, M9+1:-0.00079]}{28807@}{28808@}{28809@}{28810@}	{28798@[y5+1:-0.74, y7+1:-0.55];[M9+1:-0.96, M9+1:-0.72]}{28807@}{28808@}{28809@}{28810@}	{28798@[y5+1:14823, y7+1:592317];[M9+1:261405, M9+1:38111]}{28807@}{28808@}{28809@}{28810@}	{28798@4}{28807@0}{28808@0}{28809@0}{28810@0}		30.3368	157.997	22	2;2	4	24	54	T	0	0	0	36.3987	157.997	9	2;2	4	25	8	T	0	0	0
Z:\FPL_users\Raw_files_FPL\Eclipse\2023\Zheng\20230130_ZS_WP_xlms\20230116_Eclipse_ZS_WP_denv_rNS1_hdl_1_5_R1.raw	18457	18455	640.652	3	1918.93	Intra	K;K		ApoA1	118	ApoA1	219	LAEYHAK	LAEYHAK(7)	830.429	13.1549	{18457@[y1+1, y3+1, y4+1, y5+1, y5+1, y6+1, y6+1];[b2+2, b3+1, b5+1, b6+1];[M7+1, M7+1]}{18459@}{18460@}{18461@[y6+1];[b1+1]}{18462@}	{18457@[y1+1:201.12242, y3+1:409.21826, y4+1:572.28040, y5+1:701.32379, y5+1:733.29571, y6+1:772.36060, y6+1:804.33142];[b2+2:93.06832, b3+1:314.16959, b5+1:614.29010, b6+1:685.32788];[M7+1:885.44454, M7+1:917.41566]}{18459@}{18460@}{18461@[y6+1:772.37000];[b1+1:114.08120]}{18462@}	{18457@[y1+1:-0.00094, y3+1:-0.00113, y4+1:-0.00232, y5+1:-0.00152, y5+1:-0.00168, y6+1:-0.00183, y6+1:-0.00308];[b2+2:0.00092, b3+1:-0.00146, b5+1:-0.00319, b6+1:-0.00252];[M7+1:-0.00195, M7+1:-0.00291]}{18459@}{18460@}{18461@[y6+1:0.00757];[b1+1:-0.01014]}{18462@}	{18457@[y1+1:-4.71, y3+1:-2.76, y4+1:-4.07, y5+1:-2.17, y5+1:-2.29, y6+1:-2.37, y6+1:-3.84];[b2+2:4.99, b3+1:-4.67, b5+1:-5.20, b6+1:-3.68];[M7+1:-2.21, M7+1:-3.18]}{18459@}{18460@}{18461@[y6+1:9.81];[b1+1:-89.63]}{18462@}	{18457@[y1+1:123751, y3+1:53798, y4+1:23537, y5+1:106924, y5+1:81302, y6+1:39963, y6+1:20636];[b2+2:82362, b3+1:16592, b5+1:17462, b6+1:15264];[M7+1:461758, M7+1:1000372]}{18459@}{18460@}{18461@[y6+1:616];[b1+1:616]}{18462@}	{18457@13}{18459@0}{18460@0}{18461@2}{18462@0}		35.3329	158.003	12	2;2	4	13	68	T	0	0	0	30.3368	157.997	22	2;2	4	24	54	T	0	0	0
Z:\FPL_users\Raw_files_FPL\Fusion Lumos\2023\Zheng\20230111_WP_sNS1_xlms\20230110_SZ_WP_DENV_rNS1_HDL_1_1_R2.raw	11468	11443	659.656	3	1975.95	Inter	K;K		ApoA1	118	NS1	48	LASAIQK	LAS[DSSO:DSSO_loop_S on S]AIQK(7)	887.442	4.08175	{11468@[y1+1];[b6+1];[M7+1, M7+1]}{11470@}{11471@}{11472@}{11473@}	{11468@[y1+1:201.12308];[b6+1:742.33850];[M7+1:942.45585, M7+1:974.42835]}{11470@}{11471@}{11472@}{11473@}	{11468@[y1+1:-0.00029];[b6+1:-0.00554];[M7+1:-0.00427, M7+1:-0.00386]}{11470@}{11471@}{11472@}{11473@}	{11468@[y1+1:-1.43];[b6+1:-7.47];[M7+1:-4.54, M7+1:-3.96]}{11470@}{11471@}{11472@}{11473@}	{11468@[y1+1:186090];[b6+1:46567];[M7+1:902729, M7+1:1362546]}{11470@}{11471@}{11472@}{11473@}	{11468@4}{11470@0}{11471@0}{11472@0}{11473@0}		21.1972	158.001	39	2;2	4	22	26	T	0	0	0	35.333	158.003	12	2;2	4	13	68	T	0	0	0
Z:\FPL_users\Raw_files_FPL\Eclipse\2023\Zheng\20230130_ZS_WP_xlms\20230116_Eclipse_ZS_WP_denv_rNS1_R1.raw	25527	25489	957.795	3	2870.36	Intra	K;S		NS1	94	NS1	2	DSGCVVSWK	DSGC[Common Fixed:Carbamidomethyl on C]VVSWK(2)	1036.46	4.12117	{25527@[y3+1, y7+1];[M9+1, M9+1]}{25529@}{25530@}{25531@}{25532@}	{25527@[y3+1:420.22272, y7+1:835.41028];[M9+1:1091.47858, M9+1:1123.45002]}{25529@}{25530@}{25531@}{25532@}	{25527@[y3+1:-0.00143, y7+1:-0.00281];[M9+1:-0.00404, M9+1:-0.00468]}{25529@}{25530@}{25531@}{25532@}	{25527@[y3+1:-3.41, y7+1:-3.36];[M9+1:-3.70, M9+1:-4.17]}{25529@}{25530@}{25531@}{25532@}	{25527@[y3+1:15675, y7+1:12011];[M9+1:771304, M9+1:171633]}{25529@}{25530@}{25531@}{25532@}	{25527@4}{25529@0}{25530@0}{25531@0}{25532@0}		46.4335	158	31	2;2	4	10	2	T	0	0	0	31.2898	157.999	17	2;2	4	43	98	T	0	0	0
Z:\FPL_users\Raw_files_FPL\Eclipse\2023\Zheng\20230130_ZS_WP_xlms\20230116_Eclipse_ZS_WP_denv_rNS1_hdl_1_5_R1.raw	23689	23647	981.79	3	2942.35	Inter	K;T		ApoA1	120	NS1	117	YSWKTWGK	YSWK[DSSO:DSSO_hydrotris_K on K]TWGK(5)	1333.6	4.16405	{23689@[y5+1];[M8+1, M8+1];[b7+1]}{23691@}{23692@}{23693@}{23694@}	{23689@[y5+1:952.46198];[M8+1:1388.62177, M8+1:1420.59408];[b7+1:1274.48572]}{23691@}{23692@}{23693@}{23694@}	{23689@[y5+1:0.01749];[M8+1:0.00262, M8+1:0.00284];[b7+1:0.00001]}{23691@}{23692@}{23693@}{23694@}	{23689@[y5+1:18.39];[M8+1:1.89, M8+1:2.00];[b7+1:0.01]}{23691@}{23692@}{23693@}{23694@}	{23689@[y5+1:146847];[M8+1:7366666, M8+1:6623886];[b7+1:88139]}{23691@}{23692@}{23693@}{23694@}	{23689@4}{23691@0}{23692@0}{23693@0}{23694@0}		25.3672	158	42	2;2	4	30	1	T	0	0	0	38.3347	157.994	24	2;2	4	4	20	T	0	0	0
Z:\FPL_users\Raw_files_FPL\Eclipse\2023\Zheng\20230130_ZS_WP_xlms\20230116_Eclipse_ZS_WP_denv_rNS1_R1.raw	20731	20667	631.829	4	2523.28	Intra	K;K		NS1	94	NS1	120	TWGKAK	TWGKAK(4)	689.386	7.14829	{20731@[b2+1, b2+3];[y4+1, y4+1, y5+1];[M6+1, M6+1]}{20736@}{20737@}{20738@}{20739@}	{20731@[b2+1:288.13379, b2+3:96.71598];[y4+1:457.27641, y4+1:489.24829, y5+1:643.35547];[M6+1:744.40300, M6+1:776.37457]}{20736@}{20737@}{20738@}{20739@}	{20731@[b2+1:-0.00048, b2+3:-0.00089];[y4+1:-0.00049, y4+1:-0.00069, y5+1:-0.00075];[M6+1:-0.00089, M6+1:-0.00141]}{20736@}{20737@}{20738@}{20739@}	{20731@[b2+1:-1.67, b2+3:-3.10];[y4+1:-1.07, y4+1:-1.42, y5+1:-1.17];[M6+1:-1.20, M6+1:-1.81]}{20736@}{20737@}{20738@}{20739@}	{20731@[b2+1:62565, b2+3:488513];[y4+1:155547, y4+1:38700, y5+1:14862];[M6+1:189482, M6+1:740818]}{20736@}{20737@}{20738@}{20739@}	{20731@7}{20736@0}{20737@0}{20738@0}{20739@0}		44.5364	157.999	6	2;2	4	29	57	T	0	0	0	30.3993	158.002	32	2;2	4	28	18	T	0	0	0
Z:\FPL_users\Raw_files_FPL\Eclipse\2023\Zheng\20230130_ZS_WP_xlms\20230116_Eclipse_ZS_WP_denv_rNS1_R1.raw	19226	19170	678.348	4	2709.36	Intra	K;K		NS1	94	NS1	101	GIMQAGKR	GIMQAGKR(7)	859.47	17.1973	{19226@[b2+4, b3+1, b3+3, b4+1, b4+3, b5+1, b5+3];[y3+1, y3+1, y4+1, y4+1, y5+1, y5+1, y6+1, y6+1];[M8+1, M8+2]}{19228@}{19229@}{19230@}{19231@}	{19226@[b2+4:43.53350, b3+1:302.15240, b3+3:101.38908, b4+1:430.21140, b4+3:144.07530, b5+1:501.24808, b5+3:167.75395];[y3+1:414.24503, y3+1:446.21661, y4+1:485.28199, y4+1:517.25317, y5+1:613.34037, y5+1:645.31311, y6+1:744.38025, y6+1:776.35233];[M8+1:914.48563, M8+2:473.73244]}{19228@}{19229@}{19230@}{19231@}	{19226@[b2+4:-0.00062, b3+1:-0.00088, b3+3:-0.00061, b4+1:-0.00047, b4+3:-0.00051, b5+1:-0.00090, b5+3:-0.00168];[y3+1:-0.00091, y3+1:-0.00141, y4+1:-0.00106, y4+1:-0.00196, y5+1:-0.00126, y5+1:-0.00060, y6+1:-0.00187, y6+1:-0.00187];[M8+1:-0.00201, M8+2:-0.00212]}{19228@}{19229@}{19230@}{19231@}	{19226@[b2+4:-3.65, b3+1:-2.94, b3+3:-2.04, b4+1:-1.10, b4+3:-1.19, b5+1:-1.81, b5+3:-3.36];[y3+1:-2.21, y3+1:-3.16, y4+1:-2.20, y4+1:-3.79, y5+1:-2.05, y5+1:-0.93, y6+1:-2.51, y6+1:-2.41];[M8+1:-2.20, M8+2:-2.25]}{19228@}{19229@}{19230@}{19231@}	{19226@[b2+4:195540, b3+1:4275, b3+3:107477, b4+1:6483, b4+3:75773, b5+1:19766, b5+3:75526];[y3+1:32454, y3+1:4085, y4+1:30584, y4+1:5416, y5+1:29467, y5+1:5082, y6+1:26328, y6+1:5386];[M8+1:21101, M8+2:19532]}{19228@}{19229@}{19230@}{19231@}	{19226@17}{19228@0}{19229@0}{19230@0}{19231@0}		38.3752	157.997	11	2;2	4	19	40	T	0	0	0	30.3579	157.995	21	2;2	4	5	38	T	0	0.0078823	8.3e-05
Z:\FPL_users\Raw_files_FPL\Eclipse\2023\Zheng\20230130_ZS_WP_xlms\20230116_Eclipse_ZS_WP_denv_rNS1_hdl_1_5_R1.raw	23539	23531	726.751	5	3628.72	Intra	K;K		ApoA1	120	ApoA1	112	ETEGLRQEMSKDLEEVK	ETEGLRQEMSKDLEEVK(11)	2019.98	16.0789	{23539@[y3+1, y4+1, y5+1, y6+1, y7+1, y7+3, y8+1, y8+1, y9+1, y12+2, y14+2, y15+2];[M17+2, M17+2];[b2+4, b3+4]}{23545@[y2+1, y4+1, y5+1, y9+1, y15+1]}{23546@}{23547@}{23548@}	{23539@[y3+1:375.22327, y4+1:504.26593, y5+1:617.34973, y6+1:732.37655, y7+1:914.48090, y7+3:316.15338, y8+1:1001.51312, y8+1:1033.48535, y9+1:1132.55371, y12+2:789.36757, y14+2:858.43465, y15+2:922.95564];[M17+2:1038.00082, M17+2:1053.98657];[b2+4:58.52873, b3+4:90.78876]}{23545@[y2+1:246.19739, y4+1:504.29638, y5+1:617.34631, y9+1:1132.57007, y15+1:1876.88139]}{23546@}{23547@}{23548@}	{23539@[y3+1:-0.00054, y4+1:-0.00047, y5+1:-0.00074, y6+1:-0.00086, y7+1:-0.00204, y7+3:-0.00942, y8+1:-0.00184, y8+1:-0.00169, y9+1:-0.00174, y12+2:-0.00194, y14+2:-0.00123, y15+2:-0.00184];[M17+2:-0.00175, M17+2:-0.00235];[b2+4:-0.00447, b3+4:-0.00692]}{23545@[y2+1:0.01617, y4+1:0.02998, y5+1:-0.00416, y9+1:0.01462, y15+1:0.00346]}{23546@}{23547@}{23548@}	{23539@[y3+1:-1.46, y4+1:-0.94, y5+1:-1.20, y6+1:-1.17, y7+1:-2.23, y7+3:-9.96, y8+1:-1.84, y8+1:-1.64, y9+1:-1.53, y12+2:-1.23, y14+2:-0.72, y15+2:-1.00];[M17+2:-0.85, M17+2:-1.11];[b2+4:-19.44, b3+4:-19.27]}{23545@[y2+1:65.94, y4+1:59.57, y5+1:-6.74, y9+1:12.92, y15+1:1.84]}{23546@}{23547@}{23548@}	{23539@[y3+1:134003, y4+1:278070, y5+1:278577, y6+1:581043, y7+1:204686, y7+3:973582, y8+1:577606, y8+1:121208, y9+1:174933, y12+2:235306, y14+2:269590, y15+2:217663];[M17+2:604111, M17+2:1434466];[b2+4:1113951, b3+4:271669]}{23545@[y2+1:5996, y4+1:4197, y5+1:40958, y9+1:5123, y15+1:1055]}{23546@}{23547@}{23548@}	{23539@16}{23545@5}{23546@0}{23547@0}{23548@0}		38.3347	157.994	24	2;2	4	4	20	T	0	0	0	32.2693	157.996	8	2;2	4	12	53	T	0	0	0
Z:\FPL_users\Raw_files_FPL\Eclipse\2023\Zheng\20230130_ZS_WP_xlms\20230116_Eclipse_ZS_WP_denv_rNS1_hdl_1_5_R1.raw	21503	21465	610.8	4	2439.17	Intra	K;Y		ApoA1	120	ApoA1	216	LAEYHAK	LAEYHAK(4)	830.429	9.06773	{21503@[b2+1, b2+3];[y4+3, y5+1, y5+1, y6+1, y6+1];[M7+1, M7+1]}{21509@}{21510@[b3+1];[y4+1]}{21511@[y1+1, y4+1]}{21512@}	{21503@[b2+1:185.12801, b2+3:62.37914];[y4+3:191.43865, y5+1:701.32489, y5+1:733.29690, y6+1:772.36175, y6+1:804.33345];[M7+1:885.44552, M7+1:917.41766]}{21509@}{21510@[b3+1:314.16602];[y4+1:604.25896]}{21511@[y1+1:147.11401, y4+1:572.28419]}{21512@}	{21503@[b2+1:-0.00045, b2+3:-0.00558];[y4+3:0.01868, y5+1:-0.00042, y5+1:-0.00049, y6+1:-0.00067, y6+1:-0.00105];[M7+1:-0.00097, M7+1:-0.00091]}{21509@}{21510@[b3+1:-0.00503];[y4+1:0.00416]}{21511@[y1+1:0.00121, y4+1:0.00147]}{21512@}	{21503@[b2+1:-2.43, b2+3:-30.30];[y4+3:32.70, y5+1:-0.60, y5+1:-0.67, y6+1:-0.87, y6+1:-1.31];[M7+1:-1.10, M7+1:-0.99]}{21509@}{21510@[b3+1:-16.07];[y4+1:6.90]}{21511@[y1+1:8.28, y4+1:2.58]}{21512@}	{21503@[b2+1:142448, b2+3:1525648];[y4+3:309476, y5+1:1540155, y5+1:809087, y6+1:747950, y6+1:358564];[M7+1:1370213, M7+1:2374557]}{21509@}{21510@[b3+1:1613];[y4+1:1613]}{21511@[y1+1:9658, y4+1:1912]}{21512@}	{21503@9}{21509@0}{21510@2}{21511@2}{21512@0}		32.2693	157.996	8	2;2	4	12	53	T	0	0	0	27.3031	157.999	16	2;2	4	26	33	T	0	0	0
Z:\FPL_users\Raw_files_FPL\Eclipse\2023\Zheng\20230130_ZS_WP_xlms\20230116_Eclipse_ZS_WP_denv_rNS1_R1.raw	21101	21064	738.179	5	3685.86	Intra	K;K		NS1	94	NS1	48	LASAIQKAHEEGICGIR	LASAIQKAHEEGIC[Common Fixed:Carbamidomethyl on C]GIR(7)	1851.96	10.084	{21101@[y4+1, y12+2, y13+2, y15+2, y15+2];[b5+1, b7+1, b7+1];[M17+2, M17+2]}{21103@[y10+1];[b7+1]}{21104@[y10+1];[b7+1]}{21105@}{21106@}	{21101@[y4+1:505.25446, y12+2:726.35519, y13+2:782.89685, y15+2:861.93069, y15+2:877.91716];[b5+1:456.28073, b7+1:766.44031, b7+1:798.41302];[M17+2:953.99138, M17+2:969.97754]}{21103@[y10+1:1141.53699];[b7+1:766.44604]}{21104@[y10+1:1141.53711];[b7+1:798.41841]}{21105@}{21106@}	{21101@[y4+1:-0.00067, y12+2:-0.00287, y13+2:-0.00361, y15+2:-0.00508, y15+2:-0.00421];[b5+1:-0.00093, b7+1:-0.00545, b7+1:-0.00482];[M17+2:-0.00487, M17+2:-0.00464]}{21103@[y10+1:-0.00488];[b7+1:0.00028]}{21104@[y10+1:-0.00476];[b7+1:0.00057]}{21105@}{21106@}	{21101@[y4+1:-1.33, y12+2:-1.98, y13+2:-2.31, y15+2:-2.95, y15+2:-2.40];[b5+1:-2.04, b7+1:-7.12, b7+1:-6.04];[M17+2:-2.56, M17+2:-2.39]}{21103@[y10+1:-4.28];[b7+1:0.36]}{21104@[y10+1:-4.17];[b7+1:0.72]}{21105@}{21106@}	{21101@[y4+1:3352, y12+2:12678, y13+2:22373, y15+2:51435, y15+2:8875];[b5+1:3553, b7+1:3030, b7+1:4013];[M17+2:25652, M17+2:45658]}{21103@[y10+1:287];[b7+1:287]}{21104@[y10+1:64];[b7+1:64]}{21105@}{21106@}	{21101@10}{21103@2}{21104@2}{21105@0}{21106@0}		28.2769	157.996	20	2;2	4	9	28	T	0	0	0	30.2085	-529.275	5	2;2	4	23	1	T	0	0	0
Z:\FPL_users\Raw_files_FPL\Fusion Lumos\2023\Zheng\20230111_WP_sNS1_xlms\20230110_SZ_WP_DENV_rNS1_HDL_1_1_R1.raw	23109	23054	776.859	2	1551.7	Intra	K;K		NS1	94	NS1	9	DSGCVVSWKNK	DSGC[Common Fixed:Carbamidomethyl on C]VVSWKNK(9)	1278.6	22.095	{23109@[y2+1, y3+1, y4+1, y4+1, y5+1, y5+1, y6+1, y6+1, y7+1, y7+1, y9+2, y9+1];[b4+1, b5+1, b6+1, b7+1, b8+1, b9+1, b9+1, b10+1];[M11+1, M11+1]}{23112@[y4+1];[b9+1]}{23113@[b6+1];[y6+1]}{23114@[b2+1];[y4+1, y8+1]}{23115@[b2+1, b6+1];[y5+1, y6+1, y7+1, y8+1, y9+1]}	{23109@[y2+1:261.15567, y3+1:443.26129, y4+1:629.33990, y4+1:661.31299, y5+1:716.37231, y5+1:748.34366, y6+1:815.44206, y6+1:847.41524, y7+1:914.50900, y7+1:946.47721, y9+2:566.28394, y9+1:1163.53137];[b4+1:420.11786, b5+1:519.18618, b6+1:618.25508, b7+1:705.28882, b8+1:891.36560, b9+1:1073.46777, b9+1:1105.44824, b10+1:1187.51794];[M11+1:1333.62043, M11+1:1365.59123]}{23112@[y4+1:629.33336];[b9+…	{23109@[y2+1:-0.00006, y3+1:0.00004, y4+1:-0.00066, y4+1:0.00034, y5+1:-0.00028, y5+1:-0.00102, y6+1:0.00105, y6+1:0.00215, y7+1:-0.00043, y7+1:-0.00430, y9+2:-0.00094, y9+1:-0.00224];[b4+1:-0.00050, b5+1:-0.00060, b6+1:-0.00011, b7+1:0.00160, b8+1:-0.00093, b9+1:-0.00428, b9+1:0.00411, b10+1:0.00296];[M11+1:-0.00008, M11+1:-0.00136]}{23112@[y4+1:-0.00721];[b9+1:-0.00534]}{23113@[b6+1:0.01145];[y…	{23109@[y2+1:-0.24, y3+1:0.08, y4+1:-1.05, y4+1:0.52, y5+1:-0.40, y5+1:-1.36, y6+1:1.28, y6+1:2.54, y7+1:-0.47, y7+1:-4.55, y9+2:-0.83, y9+1:-1.93];[b4+1:-1.19, b5+1:-1.15, b6+1:-0.18, b7+1:2.27, b8+1:-1.04, b9+1:-3.99, b9+1:3.72, b10+1:2.50];[M11+1:-0.06, M11+1:-0.99]}{23112@[y4+1:-11.47];[b9+1:-4.98]}{23113@[b6+1:18.55];[y6+1:-17.22]}{23114@[b2+1:2.09];[y4+1:-11.47, y8+1:-6.23]}{23115@[b2+1:2.0…	{23109@[y2+1:72581, y3+1:166751, y4+1:170188, y4+1:125496, y5+1:848728, y5+1:364413, y6+1:669731, y6+1:324049, y7+1:241336, y7+1:148658, y9+2:128163, y9+1:68840];[b4+1:171477, b5+1:453328, b6+1:807438, b7+1:175394, b8+1:118005, b9+1:106862, b9+1:73363, b10+1:62533];[M11+1:378165, M11+1:317312]}{23112@[y4+1:289];[b9+1:428]}{23113@[b6+1:158];[y6+1:1983]}{23114@[b2+1:1138];[y4+1:2454, y8+1:1173]}{23…	{23109@22}{23112@2}{23113@2}{23114@3}{23115@7}		52.2202	-1402.8	28	1;2	3	42	25	T	0	0.515919	0.014518	29.4122	157.998	11	2;2	4	30	29	T	0	0	0
Z:\FPL_users\Raw_files_FPL\Eclipse\2023\Zheng\20230130_ZS_WP_xlms\20230116_Eclipse_ZS_WP_denv_rNS1_hdl_1_5_R1.raw	21759	21752	620.322	4	2477.26	Intra	K;K		ApoA1	120	ApoA1	142	QKVEPLR	QKVEPLR(2)	868.513	5.04611	{21759@[y3+1, y4+1, y5+1];[M7+1, M7+1]}{21760@[b4+1]}{21761@[y4+1]}{21762@}{21763@}	{21759@[y3+1:385.25506, y4+1:514.29699, y5+1:613.36558];[M7+1:923.52849, M7+1:955.50049]}{21760@[b4+1:539.28876]}{21761@[y4+1:514.30707]}{21762@}{21763@}	{21759@[y3+1:-0.00072, y4+1:-0.00139, y5+1:-0.00121];[M7+1:-0.00240, M7+1:-0.00248]}{21760@[b4+1:0.00638]}{21761@[y4+1:0.00869]}{21762@}{21763@}	{21759@[y3+1:-1.87, y4+1:-2.70, y5+1:-1.97];[M7+1:-2.60, M7+1:-2.60]}{21760@[b4+1:11.85]}{21761@[y4+1:16.94]}{21762@}{21763@}	{21759@[y3+1:4250449, y4+1:3167011, y5+1:2358709];[M7+1:3045474, M7+1:481681]}{21760@[b4+1:276370]}{21761@[y4+1:29487]}{21762@}{21763@}	{21759@5}{21760@1}{21761@1}{21762@0}{21763@0}		27.3031	157.999	16	2;2	4	26	33	T	0	0	0	26.4834	157.995	11	2;2	4	21	15	T	0	0	0
Z:\FPL_users\Raw_files_FPL\Fusion Lumos\2023\Zheng\20230111_WP_sNS1_xlms\20230110_SZ_WP_DENV_rNS1_HDL_1_1_R2.raw	23110	23025	776.859	2	1551.7	Intra	K;K		NS1	94	NS1	9	DSGCVVSWKNK	DSGC[Common Fixed:Carbamidomethyl on C]VVSWKNK(9)	1278.6	20.1464	{23110@[y2+1, y3+1, y4+1, y4+1, y5+1, y5+1, y6+1, y6+1, y7+1, y7+1, y9+1];[b4+1, b5+1, b6+1, b7+1, b8+1, b9+1, b10+1];[M11+2, M11+2]}{23116@[y6+1, y7+1]}{23117@[y6+1]}{23118@[b2+1, b9+1];[y3+1, y4+1]}{23119@[y5+1, y6+1, y7+1]}	{23110@[y2+1:261.15619, y3+1:443.26257, y4+1:629.34070, y4+1:661.31378, y5+1:716.37384, y5+1:748.34390, y6+1:815.44202, y6+1:847.41317, y7+1:914.50942, y7+1:946.48071, y9+1:1131.56104];[b4+1:420.11877, b5+1:519.18719, b6+1:618.25623, b7+1:705.28882, b8+1:891.36603, b9+1:1073.46704, b10+1:1187.51794];[M11+2:667.31440, M11+2:683.30046]}{23116@[y6+1:847.40004, y7+1:946.46671]}{23117@[y6+1:847.39996]…	{23110@[y2+1:0.00046, y3+1:0.00132, y4+1:0.00013, y4+1:0.00113, y5+1:0.00124, y5+1:-0.00077, y6+1:0.00101, y6+1:0.00008, y7+1:-0.00000, y7+1:-0.00079, y9+1:-0.00050];[b4+1:0.00041, b5+1:0.00042, b6+1:0.00105, b7+1:0.00160, b8+1:-0.00050, b9+1:-0.00501, b10+1:0.00296];[M11+2:0.00102, M11+2:0.00105]}{23116@[y6+1:-0.01305, y7+1:-0.01479]}{23117@[y6+1:-0.01313]}{23118@[b2+1:0.00042, b9+1:-0.00678];[y…	{23110@[y2+1:1.76, y3+1:2.98, y4+1:0.21, y4+1:1.72, y5+1:1.74, y5+1:-1.04, y6+1:1.24, y6+1:0.09, y7+1:-0.00, y7+1:-0.84, y9+1:-0.44];[b4+1:0.99, b5+1:0.81, b6+1:1.70, b7+1:2.27, b8+1:-0.56, b9+1:-4.67, b10+1:2.50];[M11+2:0.76, M11+2:0.77]}{23116@[y6+1:-15.42, y7+1:-15.65]}{23117@[y6+1:-15.52]}{23118@[b2+1:2.09, b9+1:-6.32];[y3+1:12.28, y4+1:-11.47]}{23119@[y5+1:-17.15, y6+1:-17.22, y7+1:-15.74]}	{23110@[y2+1:38603, y3+1:71549, y4+1:114016, y4+1:85687, y5+1:512896, y5+1:177641, y6+1:436137, y6+1:171038, y7+1:150816, y7+1:77351, y9+1:49319];[b4+1:113633, b5+1:244777, b6+1:411834, b7+1:127899, b8+1:54702, b9+1:58638, b10+1:37066];[M11+2:1860092, M11+2:297624]}{23116@[y6+1:242, y7+1:52]}{23117@[y6+1:1083]}{23118@[b2+1:457, b9+1:174];[y3+1:995, y4+1:1567]}{23119@[y5+1:1318, y6+1:1526, y7+1:14…	{23110@20}{23116@2}{23117@1}{23118@4}{23119@3}		44.2908	-1402.8	24	2;2	4	1	2	T	0	0	0	29.2469	158.003	33	2;2	4	1	2	T	0	0	0
Z:\FPL_users\Raw_files_FPL\Eclipse\2023\Zheng\20230130_ZS_WP_xlms\20230116_Eclipse_ZS_WP_denv_rNS1_hdl_1_5_R1.raw	19769	19711	624.113	5	3115.53	Intra	K;K		ApoA1	120	ApoA1	230	LAEYHAKATEHLSTLSEK	LAEYHAKATEHLSTLSEK(18)	2027.03	7.18587	{19769@[b2+4, b9+2];[y16+3, y16+3, y17+3];[M18+3, M18+3]}{19772@[y12+1];[b6+1]}{19773@}{19774@}{19775@[y13+1];[b5+1]}	{19769@[b2+4:47.03731, b9+2:493.26216];[y16+3:633.31311, y16+3:643.97051, y17+3:656.99229];[M18+3:694.68667, M18+3:705.34395]}{19772@[y12+1:1429.68896];[b6+1:685.33546]}{19773@}{19774@}{19775@[y13+1:1500.73901];[b5+1:614.28643]}	{19769@[b2+4:-0.00104, b9+2:0.00688];[y16+3:-0.00424, y16+3:-0.00413, y17+3:-0.00383];[M18+3:-0.00474, M18+3:-0.00498]}{19772@[y12+1:-0.01020];[b6+1:0.00506]}{19773@}{19774@}{19775@[y13+1:0.00274];[b5+1:-0.00685]}	{19769@[b2+4:-5.63, b9+2:6.99];[y16+3:-2.23, y16+3:-2.14, y17+3:-1.95];[M18+3:-2.28, M18+3:-2.36]}{19772@[y12+1:-7.14];[b6+1:7.39]}{19773@}{19774@}{19775@[y13+1:1.83];[b5+1:-11.18]}	{19769@[b2+4:644624, b9+2:465453];[y16+3:174736, y16+3:88098, y17+3:118545];[M18+3:2161938, M18+3:3362631]}{19772@[y12+1:1706];[b6+1:1706]}{19773@}{19774@}{19775@[y13+1:454];[b5+1:454]}	{19769@7}{19772@2}{19773@0}{19774@0}{19775@2}		26.4834	157.995	11	2;2	4	21	15	T	0	0	0	18.1667	-1131.6	40	0;0	0	-	-	T	0.00961538	0	0
Z:\FPL_users\Raw_files_FPL\Fusion Lumos\2023\Zheng\20230111_WP_sNS1_xlms\20230110_SZ_WP_DENV_rNS1_HDL_1_1_R2.raw	19644	19602	674.35	4	2693.37	Intra	K;K		NS1	94	NS1	101	GIMQAGKR	GIMQAGKR(7)	859.47	15.06	{19644@[y2+1, y3+1, y3+1, y4+1, y4+1, y5+1, y5+1, y6+1, y6+2];[b3+1, b4+1, b5+1, b7+1];[M8+1, M8+1]}{19649@[M8+1]}{19650@}{19651@[y5+1]}{19652@}	{19644@[y2+1:357.22369, y3+1:414.24527, y3+1:446.21768, y4+1:485.28266, y4+1:517.25507, y5+1:613.34056, y5+1:645.31439, y6+1:744.38155, y6+2:388.68010];[b3+1:302.15265, b4+1:430.21097, b5+1:501.24895, b7+1:740.37683];[M8+1:914.48578, M8+1:946.45764]}{19649@[M8+1:946.46662]}{19650@}{19651@[y5+1:613.33336]}{19652@}	{19644@[y2+1:-0.00078, y3+1:-0.00067, y3+1:-0.00034, y4+1:-0.00039, y4+1:-0.00007, y5+1:-0.00108, y5+1:0.00068, y6+1:-0.00056, y6+2:-0.00127];[b3+1:-0.00064, b4+1:-0.00090, b5+1:-0.00003, b7+1:0.00086];[M8+1:-0.00186, M8+1:-0.00209]}{19649@[M8+1:0.00689]}{19650@}{19651@[y5+1:-0.00827]}{19652@}	{19644@[y2+1:-2.19, y3+1:-1.62, y3+1:-0.76, y4+1:-0.81, y4+1:-0.13, y5+1:-1.76, y5+1:1.06, y6+1:-0.75, y6+2:-1.64];[b3+1:-2.13, b4+1:-2.09, b5+1:-0.06, b7+1:1.17];[M8+1:-2.04, M8+1:-2.21]}{19649@[M8+1:7.29]}{19650@}{19651@[y5+1:-13.51]}{19652@}	{19644@[y2+1:55066, y3+1:655083, y3+1:130561, y4+1:793384, y4+1:99262, y5+1:695903, y5+1:90748, y6+1:729007, y6+2:146874];[b3+1:126664, b4+1:158118, b5+1:564357, b7+1:134828];[M8+1:685099, M8+1:131846]}{19649@[M8+1:130]}{19650@}{19651@[y5+1:16637]}{19652@}	{19644@15}{19649@1}{19650@0}{19651@1}{19652@0}		42.2138	158.002	49	2;2	4	14	7	T	0	4.71e-06	0	28.5803	158.001	42	1;1	2	5	15	T	0	0	0
Z:\FPL_users\Raw_files_FPL\Eclipse\2023\Zheng\20230130_ZS_WP_xlms\20230116_Eclipse_ZS_WP_denv_rNS1_hdl_1_5_R1.raw	24026	23998	644.3	4	2573.17	Intra	K;T		ApoA1	120	ApoA1	92	EQLGPVTQEFWDNLEK	EQLGPVTQEFWDNLEK[DSSO:DSSO_thiol_K on K](7)	2017.91	4.0453	{24026@[y3+1, y12+1];[b13+1, b14+2]}{24032@}{24033@}{24034@}{24035@[b3+1]}	{24026@[y3+1:475.22205, y12+1:1645.71322];[b13+1:1598.70480, b14+2:856.39834]}{24032@}{24033@}{24034@}{24035@[b3+1:371.19501]}	{24026@[y3+1:-0.00002, y12+1:-0.00703];[b13+1:-0.00736, b14+2:-0.00682]}{24032@}{24033@}{24034@}{24035@[b3+1:0.00250]}	{24026@[y3+1:-0.03, y12+1:-4.27];[b13+1:-4.60, b14+2:-3.99]}{24032@}{24033@}{24034@}{24035@[b3+1:6.74]}	{24026@[y3+1:284946, y12+1:387869];[b13+1:831683, b14+2:3768573]}{24032@}{24033@}{24034@}{24035@[b3+1:816]}	{24026@4}{24032@0}{24033@0}{24034@0}{24035@1}		18.1667	-1131.6	40	0;0	0	-	-	T	0.009615	0	0	18.1349	157.994	99	1;2	3	45	3	T	0.00952381	0	0
Z:\FPL_users\Raw_files_FPL\Fusion Lumos\2023\Zheng\20230111_WP_sNS1_xlms\20230110_SZ_WP_DENV_rNS1_HDL_1_1_R2.raw	25479	25405	957.797	3	2870.37	Intra	K;S		NS1	94	NS1	2	DSGCVVSWK	DSGC[Common Fixed:Carbamidomethyl on C]VVSWK(2)	1036.46	5.11188	{25479@[y3+1, y4+1, y7+1];[M9+1, M9+1]}{25482@}{25483@[b3+1]}{25484@}{25485@}	{25479@[y3+1:420.22424, y4+1:519.29175, y7+1:835.41559];[M9+1:1091.48218, M9+1:1123.45349]}{25482@}{25483@[b3+1:346.06668]}{25484@}{25485@}	{25479@[y3+1:0.00010, y4+1:-0.00081, y7+1:0.00250];[M9+1:-0.00044, M9+1:-0.00121]}{25482@}{25483@[b3+1:-0.00367]}{25484@}{25485@}	{25479@[y3+1:0.23, y4+1:-1.57, y7+1:3.00];[M9+1:-0.41, M9+1:-1.08]}{25482@}{25483@[b3+1:-10.64]}{25484@}{25485@}	{25479@[y3+1:249010, y4+1:103825, y7+1:115522];[M9+1:8639532, M9+1:1933139]}{25482@}{25483@[b3+1:418]}{25484@}{25485@}	{25479@5}{25482@0}{25483@1}{25484@0}{25485@0}		39.3191	158.004	49	2;2	4	10	71	T	0	2.65e-05	1e-06	28.2769	157.996	20	2;2	4	9	28	T	0	0	0
Z:\FPL_users\Raw_files_FPL\Eclipse\2023\Zheng\20230130_ZS_WP_xlms\20230116_Eclipse_ZS_WP_denv_rNS1_R1.raw	9892	9885	626.654	3	1876.94	Intra	K;K		NS1	101	NS1	101	GIMQAGKR	GIMQAGKR(7)	859.47	20.3049	{9892@[y2+1, y3+1, y3+1, y4+1, y4+1, y5+1, y5+1, y6+1, y6+1];[b2+3, b3+1, b3+2, b4+1, b4+2, b5+1, b5+2, b6+1, b7+1];[M8+1, M8+1]}{9894@[y1+1, y5+1];[b3+1]}{9895@[y6+1];[b2+1]}{9896@}{9897@}	{9892@[y2+1:357.22369, y3+1:414.24532, y3+1:446.21735, y4+1:485.28245, y4+1:517.25427, y5+1:613.34052, y5+1:645.31244, y6+1:744.38067, y6+1:776.35266];[b2+3:57.70872, b3+1:302.15259, b3+2:151.57953, b4+1:430.21112, b4+2:215.60857, b5+1:501.24801, b5+2:251.12724, b6+1:558.26917, b7+1:740.37457];[M8+1:914.48574, M8+1:946.45825]}{9894@[y1+1:175.12206, y5+1:613.33606];[b3+1:302.15734]}{9895@[y6+1:776…	{9892@[y2+1:-0.00078, y3+1:-0.00062, y3+1:-0.00067, y4+1:-0.00061, y4+1:-0.00086, y5+1:-0.00111, y5+1:-0.00127, y6+1:-0.00144, y6+1:-0.00153];[b2+3:-0.00119, b3+1:-0.00070, b3+2:-0.00151, b4+1:-0.00075, b4+2:-0.00200, b5+1:-0.00097, b5+2:-0.00177, b6+1:-0.00128, b7+1:-0.00139];[M8+1:-0.00191, M8+1:-0.00147]}{9894@[y1+1:0.00310, y5+1:-0.00557];[b3+1:0.00405]}{9895@[y6+1:-0.00416];[b2+1:0.00256]}{9…	{9892@[y2+1:-2.19, y3+1:-1.50, y3+1:-1.51, y4+1:-1.25, y4+1:-1.67, y5+1:-1.81, y5+1:-1.97, y6+1:-1.94, y6+1:-1.98];[b2+3:-7.01, b3+1:-2.33, b3+2:-5.03, b4+1:-1.74, b4+2:-4.66, b5+1:-1.95, b5+2:-3.54, b6+1:-2.30, b7+1:-1.89];[M8+1:-2.09, M8+1:-1.56]}{9894@[y1+1:17.82, y5+1:-9.10];[b3+1:13.45]}{9895@[y6+1:-5.36];[b2+1:15.04]}{9896@}{9897@}	{9892@[y2+1:9771, y3+1:126643, y3+1:27246, y4+1:131854, y4+1:25689, y5+1:111211, y5+1:28792, y6+1:111060, y6+1:28176];[b2+3:189404, b3+1:29238, b3+2:151719, b4+1:26055, b4+2:132427, b5+1:85979, b5+2:157528, b6+1:11877, b7+1:19946];[M8+1:337826, M8+1:59958]}{9894@[y1+1:2945, y5+1:5039];[b3+1:5039]}{9895@[y6+1:1668];[b2+1:1668]}{9896@}{9897@}	{9892@20}{9894@3}{9895@2}{9896@0}{9897@0}		40.6098	157.999	18	2;2	4	38	38	T	0	0	0	28.183	157.999	10	2;2	4	29	2	T	0	0	0
Z:\FPL_users\Raw_files_FPL\Eclipse\2023\Zheng\20230130_ZS_WP_xlms\20230116_Eclipse_ZS_WP_denv_rNS1_hdl_1_5_R1.raw	27513	27420	1056.27	4	4221.05	Intra	K;K		ApoA1	120	ApoA1	142	QKVEPLRAELQEGAR	QKVEPLRAELQEGAR(2)	1722.94	8.06579	{27513@[y11+2, y12+2, y13+2, y14+2];[M15+2, M15+3];[b9+1, b10+3]}{27519@[b4+1, b9+1, b9+1];[y6+1, y11+1]}{27520@}{27521@}{27522@}	{27513@[y11+2:620.34331, y12+2:684.86419, y13+2:734.39870, y14+2:825.47321];[M15+2:889.48013, M15+3:603.97895];[b9+1:1137.56299, b10+3:417.54620]}{27519@[b4+1:539.30114, b9+1:1105.61096, b9+1:1105.61322];[y6+1:673.34924, y11+1:1239.65906]}{27520@}{27521@}{27522@}	{27513@[y11+2:-0.00107, y12+2:-0.00191, y13+2:-0.00128, y14+2:0.04220];[M15+2:-0.00254, M15+3:-0.00531];[b9+1:-0.00912, b10+3:-0.03213]}{27519@[b4+1:0.01876, b9+1:0.01093, b9+1:0.01319];[y6+1:-0.01353, y11+1:-0.02135]}{27520@}{27521@}{27522@}	{27513@[y11+2:-0.87, y12+2:-1.39, y13+2:-0.88, y14+2:25.59];[M15+2:-1.43, M15+3:-2.94];[b9+1:-8.03, b10+3:-25.71]}{27519@[b4+1:34.85, b9+1:9.90, b9+1:11.94];[y6+1:-20.12, y11+1:-17.24]}{27520@}{27521@}{27522@}	{27513@[y11+2:33085, y12+2:21878, y13+2:22107, y14+2:48323];[M15+2:338870, M15+3:25076];[b9+1:24744, b10+3:66094]}{27519@[b4+1:173, b9+1:264, b9+1:812];[y6+1:264, y11+1:173]}{27520@}{27521@}{27522@}	{27513@8}{27519@5}{27520@0}{27521@0}{27522@0}		18.1349	157.994	99	1;2	3	45	3	T	0.009524	0	0	18.1197	157.988	14	2;1	3	6	2	T	0.00943396	0	0
Z:\FPL_users\Raw_files_FPL\Fusion Lumos\2023\Zheng\20230111_WP_sNS1_xlms\20230110_SZ_WP_DENV_rNS1_HDL_1_1_R1.raw	18156	18080	981.793	3	2942.36	Inter	K;T		ApoA1	120	NS1	117	YSWKTWGK	YSWK[DSSO:DSSO_hydrotris_K on K]TWGK(5)	1333.6	4.16732	{18156@[y6+1];[b7+1];[M8+1, M8+1]}{18161@}{18162@}{18163@}{18164@}	{18156@[y6+1:1138.52722];[b7+1:1242.51550];[M8+1:1388.62422, M8+1:1420.59581]}{18161@}{18162@}{18163@}{18164@}	{18156@[y6+1:0.00343];[b7+1:0.00188];[M8+1:0.00507, M8+1:0.00457]}{18161@}{18162@}{18163@}{18164@}	{18156@[y6+1:3.01];[b7+1:1.51];[M8+1:3.65, M8+1:3.22]}{18161@}{18162@}{18163@}{18164@}	{18156@[y6+1:49468];[b7+1:52472];[M8+1:3565511, M8+1:3232870]}{18161@}{18162@}{18163@}{18164@}	{18156@4}{18161@0}{18162@0}{18163@0}{18164@0}		25.3821	158.01	39	2;2	4	6	1	T	0	2.98e-07	0	18.1093	157.995	48	1;0	1	59	-	T	0.00934579	0	0
Z:\FPL_users\Raw_files_FPL\Fusion Lumos\2023\Zheng\20230111_WP_sNS1_xlms\20230110_SZ_WP_DENV_rNS1_HDL_1_1_R2.raw	18169	18075	981.793	3	2942.36	Inter	K;T		ApoA1	120	NS1	117	YSWKTWGK	YSWK[DSSO:DSSO_hydrotris_K on K]TWGK(5)	1333.6	4.1686	{18169@[y6+1];[M8+1, M8+1];[b7+1]}{18172@}{18173@[y6+1]}{18174@[y6+1]}{18175@[y6+1];[b6+1]}	{18169@[y6+1:1138.53333];[M8+1:1388.62529, M8+1:1420.59669];[b7+1:1274.49280]}{18172@}{18173@[y6+1:1138.53327]}{18174@[y6+1:1138.53339]}{18175@[y6+1:1138.53327];[b6+1:1217.46660]}	{18169@[y6+1:0.00953];[M8+1:0.00613, M8+1:0.00546];[b7+1:0.00709]}{18172@}{18173@[y6+1:0.00948]}{18174@[y6+1:0.00959]}{18175@[y6+1:0.00948];[b6+1:0.00236]}	{18169@[y6+1:8.38];[M8+1:4.42, M8+1:3.85];[b7+1:5.57]}{18172@}{18173@[y6+1:8.33]}{18174@[y6+1:8.43]}{18175@[y6+1:8.33];[b6+1:1.94]}	{18169@[y6+1:44100];[M8+1:2881762, M8+1:2794579];[b7+1:32459]}{18172@}{18173@[y6+1:339]}{18174@[y6+1:339]}{18175@[y6+1:896];[b6+1:407]}	{18169@4}{18172@0}{18173@1}{18174@1}{18175@2}		23.435	158.01	36	2;2	4	4	1	T	0	5.96e-08	0	39.3547	157.999	4	2;2	4	12	50	T	0	0.892917	0.004566
Z:\FPL_users\Raw_files_FPL\Eclipse\2023\Zheng\20230130_ZS_WP_xlms\20230116_Eclipse_ZS_WP_denv_rNS1_R1.raw	16174	16119	662.842	4	2647.34	Intra	K;S		NS1	101	NS1	40	FQPESPSKLASAIQK	FQPESPSKLASAIQK(7)	1629.87	15.2757	{16174@[b2+1, b2+3, b4+1, b5+1, b8+1, b10+2];[y4+1, y5+1, y6+1, y7+1, y11+1, y13+2, y13+1];[M15+2, M15+2]}{16176@[y10+1];[b5+1]}{16177@}{16178@}{16179@}	{16174@[b2+1:276.13391, b2+3:92.71596, b4+1:502.22845, b5+1:589.26141, b8+1:955.44885, b10+2:570.28941];[y4+1:459.29132, y5+1:546.32309, y6+1:617.36024, y7+1:730.44461, y11+1:1215.63208, y13+2:705.38372, y13+1:1441.73152];[M15+2:842.94703, M15+2:858.93290]}{16176@[y10+1:1128.61707];[b5+1:589.24873]}{16177@}{16178@}{16179@}	{16174@[b2+1:-0.00036, b2+3:-0.00093, b4+1:-0.00117, b5+1:-0.00024, b8+1:-0.00312, b10+2:-0.00161];[y4+1:-0.00124, y5+1:-0.00150, y6+1:-0.00146, y7+1:-0.00116, y11+1:-0.00811, y13+2:-0.00331, y13+1:-0.00402];[M15+2:-0.00367, M15+2:-0.00401]}{16176@[y10+1:0.00890];[b5+1:-0.01292]}{16177@}{16178@}{16179@}	{16174@[b2+1:-1.29, b2+3:-3.37, b4+1:-2.33, b5+1:-0.41, b8+1:-3.26, b10+2:-1.41];[y4+1:-2.70, y5+1:-2.75, y6+1:-2.37, y7+1:-1.59, y11+1:-6.68, y13+2:-2.35, y13+1:-2.79];[M15+2:-2.18, M15+2:-2.34]}{16176@[y10+1:7.90];[b5+1:-21.96]}{16177@}{16178@}{16179@}	{16174@[b2+1:110781, b2+3:1662763, b4+1:10445, b5+1:17602, b8+1:17936, b10+2:19095];[y4+1:19269, y5+1:71238, y6+1:86523, y7+1:47343, y11+1:7595, y13+2:239421, y13+1:37007];[M15+2:181996, M15+2:548226]}{16176@[y10+1:887];[b5+1:887]}{16177@}{16178@}{16179@}	{16174@15}{16176@2}{16177@0}{16178@0}{16179@0}		33.4012	157.997	61	2;2	4	51	36	T	0	0	0	18.5025	158.001	23	2;2	4	3	3	T	0.00990099	0.00809276	0.000122
Z:\FPL_users\Raw_files_FPL\Fusion Lumos\2023\Zheng\20230111_WP_sNS1_xlms\20230110_SZ_WP_DENV_rNS1_HDL_1_1_R1.raw	15196	15127	790.011	5	3945.02	Inter	K;S		ApoA1	120	NS1	348	EENLVNSLVTA	EEN[Common Artifact:Deamidation on N]LVNSLVT[DSSO:DSSO_hydro_T on T]A(7)	1364.6	2.00612	{15196@[y4+1, y9+1]}{15201@[b7+1]}{15202@}{15203@}{15204@[y7+1]}	{15196@[y4+1:579.28094, y9+1:1161.55654]}{15201@[b7+1:873.33337]}{15202@}{15203@}{15204@[y7+1:965.40004]}	{15196@[y4+1:0.01153, y9+1:0.02219]}{15201@[b7+1:0.00389]}{15202@}{15203@}{15204@[y7+1:0.00462]}	{15196@[y4+1:19.95, y9+1:19.12]}{15201@[b7+1:4.46]}{15202@}{15203@}{15204@[y7+1:4.79]}	{15196@[y4+1:24516, y9+1:261100]}{15201@[b7+1:525]}{15202@}{15203@}{15204@[y7+1:641]}	{15196@2}{15201@1}{15202@0}{15203@0}{15204@1}		22.0318	947.567	48	2;0	2	45	-	T	0	6.23e-05	3e-06	35.2582	157.997	7	2;2	4	1	4	T	0	0	0
Z:\FPL_users\Raw_files_FPL\Eclipse\2023\Zheng\20230130_ZS_WP_xlms\20230116_Eclipse_ZS_WP_denv_rNS1_hdl_1_5_R1.raw	27726	27623	1083.78	4	4331.1	Intra	K;Y		ApoA1	130	ApoA1	42	VKDLATVYVDVLK	VK[DSSO:DSSO_hydrotris_K on K]DLATVYVDVLK(8)	1740.92	3.03898	{27726@[b6+1, b12+1];[M13+2]}{27729@}{27730@}{27731@}{27732@[y7+1]}	{27726@[b6+1:907.45673, b12+1:1649.80505];[M13+2:914.47071]}{27729@}{27730@}{27731@}{27732@[y7+1:889.50437]}	{27726@[b6+1:0.01257, b12+1:-0.02924];[M13+2:0.02224]}{27729@}{27730@}{27731@}{27732@[y7+1:0.00143]}	{27726@[b6+1:13.87, b12+1:-17.73];[M13+2:12.17]}{27729@}{27730@}{27731@}{27732@[y7+1:1.61]}	{27726@[b6+1:6949, b12+1:6104];[M13+2:137152]}{27729@}{27730@}{27731@}{27732@[y7+1:515]}	{27726@3}{27729@0}{27730@0}{27731@0}{27732@1}		18.1197	157.988	14	2;1	3	6	2	T	0.009434	0	0	31.3839	157.998	18	2;2	4	14	9	T	0	0	0
Z:\FPL_users\Raw_files_FPL\Eclipse\2023\Zheng\20230130_ZS_WP_xlms\20230116_Eclipse_ZS_WP_denv_rNS1_hdl_1_5_R1.raw	26637	26539	1305.28	3	3912.8	Intra	K;K		ApoA1	130	ApoA1	118	ETEGLRQEMSKDLEEVK	ETEGLRQEM[Common Variable:Oxidation on M]SK[DSSO:DSSO_alkene_K on K]DLEEVK(17)	2089.98	7.02331	{26637@[b8+1, b9+1, b10+1, b13+1, b14+1, b15+1, b16+1]}{26640@}{26641@}{26642@}{26643@}	{26637@[b8+1:943.45099, b9+1:1090.48306, b10+1:1177.53320, b13+1:1587.74109, b14+1:1716.77091, b15+1:1845.81632, b16+1:1944.88171]}{26640@}{26641@}{26642@}{26643@}	{26637@[b8+1:0.00304, b9+1:-0.00029, b10+1:0.01782, b13+1:0.00914, b14+1:-0.00363, b15+1:-0.00082, b16+1:-0.00383]}{26640@}{26641@}{26642@}{26643@}	{26637@[b8+1:3.22, b9+1:-0.26, b10+1:15.15, b13+1:5.76, b14+1:-2.12, b15+1:-0.44, b16+1:-1.97]}{26640@}{26641@}{26642@}{26643@}	{26637@[b8+1:6768, b9+1:9097, b10+1:31651, b13+1:6512, b14+1:7243, b15+1:7376, b16+1:14306]}{26640@}{26641@}{26642@}{26643@}	{26637@7}{26640@0}{26641@0}{26642@0}{26643@0}		18.1093	157.995	48	1;0	1	59	-	T	0.009346	0	0	18.511	157.997	4	2;2	4	3	2	T	0.01	0	0
Z:\FPL_users\Raw_files_FPL\Eclipse\2023\Zheng\20230130_ZS_WP_xlms\20230116_Eclipse_ZS_WP_denv_rNS1_hdl_1_5_R1.raw	20739	20717	730.005	3	2186.99	Intra	K;K		ApoA1	131	ApoA1	263	KLNTQ	KLNTQ(1)	602.339	13.2359	{20739@[b2+1, b2+1, b3+1, b3+1, b4+1, b4+1];[y1+2, y2+1, y2+2, y3+1, y3+2];[M5+1, M5+1]}{20742@}{20743@}{20744@[b2+1]}{20745@}	{20739@[b2+1:296.19580, b2+1:328.16821, b3+1:410.23856, b3+1:442.21063, b4+1:511.28588, b4+1:543.25790];[y1+2:74.04221, y2+1:248.12299, y2+2:124.56597, y3+1:362.16586, y3+2:181.58695];[M5+1:657.35474, M5+1:689.32658]}{20742@}{20743@}{20744@[b2+1:328.16306]}{20745@}	{20739@[b2+1:-0.00106, b2+1:-0.00073, b3+1:-0.00123, b3+1:-0.00124, b4+1:-0.00159, b4+1:-0.00165];[y1+2:0.00073, y2+1:-0.00111, y2+2:0.00056, y3+1:-0.00116, y3+2:-0.00040];[M5+1:-0.00188, M5+1:-0.00211]}{20742@}{20743@}{20744@[b2+1:-0.00589]}{20745@}	{20739@[b2+1:-3.60, b2+1:-2.23, b3+1:-3.02, b3+1:-2.80, b4+1:-3.12, b4+1:-3.04];[y1+2:4.97, y2+1:-4.50, y2+2:2.26, y3+1:-3.22, y3+2:-1.12];[M5+1:-2.86, M5+1:-3.06]}{20742@}{20743@}{20744@[b2+1:-18.00]}{20745@}	{20739@[b2+1:67987, b2+1:73838, b3+1:344259, b3+1:361059, b4+1:377570, b4+1:509158];[y1+2:4932180, y2+1:274778, y2+2:3447347, y3+1:167827, y3+2:1782807];[M5+1:3605234, M5+1:3650803]}{20742@}{20743@}{20744@[b2+1:969]}{20745@}	{20739@13}{20742@0}{20743@0}{20744@1}{20745@0}		39.3547	157.999	4	2;2	4	12	50	T	0	0.892917	0.004566	18.0755	-822.365	18	2;0	2	55	-	T	0.00925926	0	0
Z:\FPL_users\Raw_files_FPL\Eclipse\2023\Zheng\20230130_ZS_WP_xlms\20230116_Eclipse_ZS_WP_denv_rNS1_hdl_1_5_R1.raw	19319	19286	685.078	4	2736.28	Intra	K;K		ApoA1	131	ApoA1	157	QKLHELQEK	QKLHELQEK(2)	1151.63	6.04284	{19319@[y4+1, y5+1, y6+1, y7+1];[M9+2, M9+1]}{19324@[b4+1]}{19325@[b4+1]}{19326@[y1+1, y1+1, y4+1, y5+1];[b5+1, b8+1, b8+1]}{19327@}	{19319@[y4+1:517.29846, y5+1:646.34131, y6+1:783.40030, y7+1:896.48434];[M9+2:603.82796, M9+1:1238.61937]}{19324@[b4+1:561.30958]}{19325@[b4+1:593.28662]}{19326@[y1+1:147.11501, y1+1:147.09819, y4+1:517.29706, y5+1:646.32963];[b5+1:722.33214, b8+1:1092.53101, b8+1:1092.51419]}{19327@}	{19319@[y4+1:0.00042, y5+1:0.00068, y6+1:0.00076, y7+1:0.00073];[M9+2:0.00094, M9+1:-0.00042]}{19324@[b4+1:-0.00478]}{19325@[b4+1:0.00019]}{19326@[y1+1:0.00220, y1+1:-0.01461, y4+1:-0.00098, y5+1:-0.01100];[b5+1:0.00312, b8+1:0.01675, b8+1:-0.00007]}{19327@}	{19319@[y4+1:0.82, y5+1:1.05, y6+1:0.97, y7+1:0.82];[M9+2:0.78, M9+1:-0.34]}{19324@[b4+1:-8.52]}{19325@[b4+1:0.31]}{19326@[y1+1:15.07, y1+1:-100.00, y4+1:-1.90, y5+1:-17.05];[b5+1:4.32, b8+1:15.34, b8+1:-0.06]}{19327@}	{19319@[y4+1:315349, y5+1:393919, y6+1:598754, y7+1:604079];[M9+2:5354910, M9+1:360243]}{19324@[b4+1:123971]}{19325@[b4+1:41599]}{19326@[y1+1:40656, y1+1:5401, y4+1:16256, y5+1:24259];[b5+1:16256, b8+1:5401, b8+1:40656]}{19327@}	{19319@6}{19324@1}{19325@1}{19326@7}{19327@0}		35.2582	157.997	7	2;2	4	1	4	T	0	0	0	18.1722	157.996	13	0;0	0	-	-	T	0.00970874	0	0
Z:\FPL_users\Raw_files_FPL\Eclipse\2023\Zheng\20230130_ZS_WP_xlms\20230116_Eclipse_ZS_WP_denv_rNS1_hdl_1_5_R1.raw	20271	20243	600.687	5	2998.4	Intra	K;K		ApoA1	131	ApoA1	230	ATEHLSTLSEKAK	ATEHLSTLSEKAK(11)	1413.75	10.1609	{20271@[y3+1, y3+1, y5+1, y5+1, y8+1];[b5+1, b7+1, b8+1];[M13+2, M13+2]}{20277@[b3+1, b4+1, b6+1, b7+1, b9+1, b10+1, b12+1];[y3+1, y4+1, y7+1, y9+1, y10+1]}{20278@[y7+1, y9+1];[b4+1, b6+1]}{20279@}{20280@}	{20271@[y3+1:400.25510, y3+1:432.22653, y5+1:616.32904, y5+1:648.30219, y8+1:949.46381];[b5+1:552.27460, b7+1:740.35303, b8+1:853.43805];[M13+2:734.88537, M13+2:750.87025]}{20277@[b3+1:302.13150, b4+1:439.19305, b6+1:639.29761, b7+1:740.37103, b9+1:940.46002, b10+1:1069.51709, b12+1:1354.63258];[y3+1:432.22351, y4+1:561.28058, y7+1:862.44299, y9+1:1062.54755, y10+1:1199.60910]}{20278@[y7+1:830.46…	{20271@[y3+1:-0.00034, y3+1:-0.00099, y5+1:-0.00102, y5+1:0.00004, y8+1:-0.00211];[b5+1:-0.00304, b7+1:-0.00432, b8+1:-0.00336];[M13+2:-0.00073, M13+2:-0.00305]}{20277@[b3+1:-0.00316, b4+1:-0.00052, b6+1:-0.01206, b7+1:0.01369, b9+1:-0.01341, b10+1:0.00106, b12+1:0.00184];[y3+1:-0.00401, y4+1:0.01046, y7+1:0.00911, y9+1:-0.00243, y10+1:0.00021]}{20278@[y7+1:0.00719, y9+1:0.01012];[b4+1:-0.01239, …	{20271@[y3+1:-0.86, y3+1:-2.29, y5+1:-1.66, y5+1:0.07, y8+1:-2.22];[b5+1:-5.52, b7+1:-5.84, b8+1:-3.94];[M13+2:-0.50, M13+2:-2.03]}{20277@[b3+1:-10.49, b4+1:-1.19, b6+1:-18.89, b7+1:18.51, b9+1:-14.28, b10+1:0.99, b12+1:1.36];[y3+1:-9.30, y4+1:18.68, y7+1:10.57, y9+1:-2.29, y10+1:0.17]}{20278@[y7+1:8.67, y9+1:9.82];[b4+1:-28.27, b6+1:-14.82]}{20279@}{20280@}	{20271@[y3+1:28057, y3+1:60725, y5+1:67558, y5+1:52030, y8+1:53739];[b5+1:28402, b7+1:39320, b8+1:27852];[M13+2:562862, M13+2:2732040]}{20277@[b3+1:966, b4+1:4889, b6+1:531, b7+1:1210, b9+1:1834, b10+1:1130, b12+1:2726];[y3+1:1130, y4+1:1834, y7+1:531, y9+1:4889, y10+1:584]}{20278@[y7+1:474, y9+1:168];[b4+1:168, b6+1:474]}{20279@}{20280@}	{20271@10}{20277@12}{20278@4}{20279@0}{20280@0}		31.3839	157.998	18	2;2	4	14	9	T	0	0	0	29.3391	157.995	22	2;2	4	17	37	T	0	0	0
Z:\FPL_users\Raw_files_FPL\Eclipse\2023\Zheng\20230130_ZS_WP_xlms\20230116_Eclipse_ZS_WP_denv_rNS1_hdl_1_5_R1.raw	20393	20381	806.034	3	2415.08	Intra	K;K		ApoA1	131	ApoA1	219	LAEYHAK	LAEYHAK(7)	830.429	4.20384	{20393@[b5+1, b6+1];[M7+1, M7+1]}{20395@}{20396@}{20397@}{20398@}	{20393@[b5+1:614.29297, b6+1:685.32910];[M7+1:885.44508, M7+1:917.41693]}{20395@}{20396@}{20397@}{20398@}	{20393@[b5+1:-0.00032, b6+1:-0.00130];[M7+1:-0.00141, M7+1:-0.00164]}{20395@}{20396@}{20397@}{20398@}	{20393@[b5+1:-0.52, b6+1:-1.90];[M7+1:-1.60, M7+1:-1.79]}{20395@}{20396@}{20397@}{20398@}	{20393@[b5+1:80036, b6+1:124760];[M7+1:1108948, M7+1:3962912]}{20395@}{20396@}{20397@}{20398@}	{20393@4}{20395@0}{20396@0}{20397@0}{20398@0}		18.511	157.997	4	2;2	4	3	2	T	0.01	0	0	18.3432	159.005	14	2;2	4	1	4	T	0.00980392	1.69873e-05	0
Z:\FPL_users\Raw_files_FPL\Eclipse\2023\Zheng\20230130_ZS_WP_xlms\20230116_Eclipse_ZS_WP_denv_rNS1_hdl_1_5_R1.raw	26844	26743	976.474	3	2926.4	Intra	K;K		ApoA1	131	ApoA1	118	DLEEVKAKVQPYLDDFQK	DLEEVKAK[DSSO:DSSO_loop_K on K]VQPYLDDFQK(6)	2322.11	5.0414	{26844@[y8+1, y9+1, y10+1, y12+1];[b11+2]}{26846@}{26847@}{26848@}{26849@}	{26844@[y8+1:1025.48950, y9+1:1153.55273, y10+1:1252.61096, y12+1:1609.76109];[b11+2:741.33862]}{26846@}{26847@}{26848@}{26849@}	{26844@[y8+1:-0.00434, y9+1:0.00032, y10+1:-0.00987, y12+1:0.00439];[b11+2:0.00484]}{26846@}{26847@}{26848@}{26849@}	{26844@[y8+1:-4.23, y9+1:0.28, y10+1:-7.88, y12+1:2.73];[b11+2:3.27]}{26846@}{26847@}{26848@}{26849@}	{26844@[y8+1:33098, y9+1:34093, y10+1:16206, y12+1:11479];[b11+2:343913]}{26846@}{26847@}{26848@}{26849@}	{26844@5}{26846@0}{26847@0}{26848@0}{26849@0}		18.0755	-822.365	18	2;0	2	55	-	T	0.009259	0	0	42.1872	-2112.13	5	1;1	2	6	1	T	0	2.38419e-07	0
Z:\FPL_users\Raw_files_FPL\Eclipse\2023\Zheng\20230130_ZS_WP_xlms\20230116_Eclipse_ZS_WP_denv_rNS1_hdl_1_5_R1.raw	24248	24180	776.127	4	3100.48	Intra	K;K		ApoA1	157	ApoA1	263	KLNTQ	KLNT[DSSO:DSSO_hydro_T on T]Q(1)	778.353	4.01293	{24248@[b2+1, b3+1, b3+1];[y1+3]}{24254@}{24255@}{24256@}{24257@}	{24248@[b2+1:296.19659, b3+1:410.23932, b3+1:442.21121];[y1+3:49.69693]}{24254@}{24255@}{24256@}{24257@}	{24248@[b2+1:-0.00027, b3+1:-0.00047, b3+1:-0.00066];[y1+3:-0.00017]}{24254@}{24255@}{24256@}{24257@}	{24248@[b2+1:-0.91, b3+1:-1.15, b3+1:-1.49];[y1+3:-1.17]}{24254@}{24255@}{24256@}{24257@}	{24248@[b2+1:20079, b3+1:31871, b3+1:30417];[y1+3:77239]}{24254@}{24255@}{24256@}{24257@}	{24248@4}{24254@0}{24255@0}{24256@0}{24257@0}		18.1722	157.996	13	0;0	0	-	-	T	0.009709	0	0	33.1083	-479.401	21	2;2	4	2	51	T	0	0.000182211	7e-06
Z:\FPL_users\Raw_files_FPL\Fusion Lumos\2023\Zheng\20230111_WP_sNS1_xlms\20230110_SZ_WP_DENV_rNS1_HDL_1_1_R1.raw	20620	20536	935.052	5	4670.22	Inter	K;K		NS1	94	ApoA1	142	KWQEEMELYRQKVEPLR	K[DSSO:DSSO_hydrotris_K on K]WQEEMELY[DSSO:DSSO_hydrotris_Y on Y]RQKVEPLR(12)	2819.32	2.00855	{20620@[y6+1, y10+1]}{20623@[b2+1]}{20624@}{20625@}{20626@}	{20620@[y6+1:827.42975, y10+1:1666.81079]}{20623@[b2+1:594.26664]}{20624@}{20625@}{20626@}	{20620@[y6+1:-0.01464, y10+1:-0.01838]}{20623@[b2+1:0.00739]}{20624@}{20625@}{20626@}	{20620@[y6+1:-17.72, y10+1:-11.03]}{20623@[b2+1:12.45]}{20624@}{20625@}{20626@}	{20620@[y6+1:508909, y10+1:197573]}{20623@[b2+1:314]}{20624@}{20625@}{20626@}	{20620@2}{20623@1}{20624@0}{20625@0}{20626@0}		30.3346	159.009	27	2;0	2	4	-	T	0	0	0	30.3346	159.009	27	2;0	2	4	-	T	0	0	0
Z:\FPL_users\Raw_files_FPL\Eclipse\2023\Zheng\20230130_ZS_WP_xlms\20230116_Eclipse_ZS_WP_denv_rNS1_hdl_1_5_R1.raw	23725	23699	707.55	5	3532.71	Intra	K;K		ApoA1	164	ApoA1	120	AKVQPYLDDFQK	AKVQPYLDDFQK(2)	1450.75	13.1505	{23725@[b2+1, b3+1, b4+1, b7+1];[y4+1, y5+1, y6+1, y8+1, y8+3, y9+1, y10+1];[M12+2, M12+2]}{23727@}{23728@}{23729@}{23730@}	{23725@[b2+1:286.12097, b3+1:385.18951, b4+1:481.27518, b7+1:886.44843];[y4+1:537.26599, y5+1:652.29149, y6+1:765.37622, y8+1:1025.49077, y8+3:342.50260, y9+1:1153.54995, y10+1:1252.61783];[M12+2:753.38330, M12+2:769.36945]}{23727@}{23728@}{23729@}{23730@}	{23725@[b2+1:-0.00102, b3+1:-0.00089, b4+1:-0.00173, b7+1:-0.00072];[y4+1:-0.00075, y5+1:-0.00219, y6+1:-0.00152, y8+1:-0.00307, y8+3:-0.00060, y9+1:-0.00246, y10+1:-0.00300];[M12+2:-0.00414, M12+2:-0.00393]}{23727@}{23728@}{23729@}{23730@}	{23725@[b2+1:-3.58, b3+1:-2.32, b4+1:-3.60, b7+1:-0.81];[y4+1:-1.39, y5+1:-3.37, y6+1:-1.99, y8+1:-2.99, y8+3:-0.59, y9+1:-2.14, y10+1:-2.40];[M12+2:-2.75, M12+2:-2.56]}{23727@}{23728@}{23729@}{23730@}	{23725@[b2+1:213828, b3+1:210575, b4+1:95988, b7+1:73724];[y4+1:73677, y5+1:405315, y6+1:457691, y8+1:1438475, y8+3:558766, y9+1:233015, y10+1:170811];[M12+2:380257, M12+2:2102215]}{23727@}{23728@}{23729@}{23730@}	{23725@13}{23727@0}{23728@0}{23729@0}{23730@0}		29.3391	157.995	22	2;2	4	17	37	T	0	0	0	25.3821	158.01	39	2;2	4	6	1	T	0	2.98023e-07	0
Z:\FPL_users\Raw_files_FPL\Eclipse\2023\Zheng\20230130_ZS_WP_xlms\20230116_Eclipse_ZS_WP_denv_rNS1_hdl_1_5_R1.raw	22992	22980	878.415	4	3509.63	Intra	K;K		ApoA1	164	ApoA1	131	KWQEEMELYR	KWQEEM[Common Variable:Oxidation on M]ELYR(1)	1426.65	9.14341	{22992@[b2+1, b3+1];[y2+1, y5+1, y6+1, y7+1, y8+1];[M10+2, M10+2]}{22993@}{22994@}{22995@[y3+1];[b9+1]}{22996@}	{22992@[b2+1:369.19107, b3+1:529.22229];[y2+1:338.18045, y5+1:727.34219, y6+1:856.38556, y7+1:985.42690, y8+1:1113.48499];[M10+2:741.33795, M10+2:757.32358]}{22993@}{22994@}{22995@[y3+1:451.28421];[b9+1:1307.56419]}{22996@}	{22992@[b2+1:-0.00104, b3+1:-0.00048];[y2+1:-0.00183, y5+1:-0.00215, y6+1:-0.00137, y7+1:-0.00262, y8+1:-0.00312];[M10+2:-0.00432, M10+2:-0.00513]}{22993@}{22994@}{22995@[y3+1:0.01786];[b9+1:0.00293]}{22996@}	{22992@[b2+1:-2.83, b3+1:-0.91];[y2+1:-5.43, y5+1:-2.95, y6+1:-1.60, y7+1:-2.66, y8+1:-2.80];[M10+2:-2.92, M10+2:-3.39]}{22993@}{22994@}{22995@[y3+1:39.68];[b9+1:2.24]}{22996@}	{22992@[b2+1:41312, b3+1:32176];[y2+1:47500, y5+1:67418, y6+1:45777, y7+1:161026, y8+1:111971];[M10+2:927785, M10+2:110108]}{22993@}{22994@}{22995@[y3+1:1892];[b9+1:739]}{22996@}	{22992@9}{22993@0}{22994@0}{22995@2}{22996@0}		18.3432	159.005	14	2;2	4	1	4	T	0.009804	1.7e-05	0	24.1723	-479.401	80	2;2	4	1	77	T	0	0	0
Z:\FPL_users\Raw_files_FPL\Fusion Lumos\2023\Zheng\20230111_WP_sNS1_xlms\20230110_SZ_WP_DENV_rNS1_HDL_1_1_R2.raw	14984	14895	755.818	2	1509.62	Intra	K;K		ApoA1	164	ApoA1	131	KWQEEMELYR	KWQEEM[Common Variable:Oxidation on M]ELYR(1)	1426.65	21.0921	{14984@[b2+1, b2+1, b3+1, b3+1, b4+1, b4+1, b5+1, b6+1, b7+1, b8+1, b8+1, b9+1, b9+1];[y2+1, y3+1, y4+1, y5+1, y6+1, y7+1, y8+1];[M10+1]}{14990@}{14991@}{14992@}{14993@}	{14984@[b2+1:369.19208, b2+1:401.16471, b3+1:497.25138, b3+1:529.22348, b4+1:626.29243, b4+1:658.26697, b5+1:787.30829, b6+1:934.34711, b7+1:1063.37903, b8+1:1144.50061, b8+1:1176.47011, b9+1:1307.56287, b9+1:1339.54456];[y2+1:338.18219, y3+1:451.26648, y4+1:580.30946, y5+1:727.34460, y6+1:856.38805, y7+1:985.42973, y8+1:1113.48737];[M10+1:1481.67126]}{14990@}{14991@}{14992@}{14993@}	{14984@[b2+1:-0.00003, b2+1:0.00052, b3+1:0.00069, b3+1:0.00071, b4+1:-0.00085, b4+1:0.00160, b5+1:0.00033, b6+1:0.00375, b7+1:-0.00692, b8+1:0.00268, b8+1:0.00010, b9+1:0.00160, b9+1:0.01121];[y2+1:-0.00009, y3+1:0.00014, y4+1:0.00052, y5+1:0.00027, y6+1:0.00112, y7+1:0.00021, y8+1:-0.00073];[M10+1:-0.00167]}{14990@}{14991@}{14992@}{14993@}	{14984@[b2+1:-0.09, b2+1:1.30, b3+1:1.39, b3+1:1.34, b4+1:-1.37, b4+1:2.44, b5+1:0.42, b6+1:4.02, b7+1:-6.51, b8+1:2.34, b8+1:0.08, b9+1:1.23, b9+1:8.38];[y2+1:-0.26, y3+1:0.30, y4+1:0.90, y5+1:0.37, y6+1:1.31, y7+1:0.21, y8+1:-0.66];[M10+1:-1.13]}{14990@}{14991@}{14992@}{14993@}	{14984@[b2+1:81790, b2+1:143858, b3+1:139800, b3+1:181030, b4+1:51359, b4+1:54284, b5+1:26379, b6+1:29356, b7+1:48290, b8+1:54220, b8+1:48121, b9+1:50995, b9+1:60605];[y2+1:220148, y3+1:156267, y4+1:202901, y5+1:395199, y6+1:458262, y7+1:756786, y8+1:531784];[M10+1:37333]}{14990@}{14991@}{14992@}{14993@}	{14984@21}{14990@0}{14991@0}{14992@0}{14993@0}		42.1872	-2112.13	5	1;1	2	6	1	T	0	2.38e-07	0	23.435	158.01	36	2;2	4	4	1	T	0	5.96046e-08	0
Z:\FPL_users\Raw_files_FPL\Eclipse\2023\Zheng\20230130_ZS_WP_xlms\20230116_Eclipse_ZS_WP_denv_rNS1_hdl_1_5_R1.raw	17045	16993	617.569	4	2466.25	Intra	K;K		ApoA1	206	ApoA1	157	QKLHELQEK	QKLHELQEK(2)	1151.63	12.1145	{17045@[y2+1, y3+1, y4+1, y5+1, y6+1, y7+1];[M9+2];[b2+1, b3+1, b4+1, b6+1, b8+2]}{17048@}{17049@}{17050@}{17051@}	{17045@[y2+1:276.15509, y3+1:404.21356, y4+1:517.29754, y5+1:646.34007, y6+1:783.39853, y7+1:896.48253];[M9+2:603.82663];[b2+1:343.14307, b3+1:456.22739, b4+1:593.28931, b6+1:835.41742, b8+2:546.76027]}{17048@}{17049@}{17050@}{17051@}	{17045@[y2+1:-0.00031, y3+1:-0.00041, y4+1:-0.00050, y5+1:-0.00056, y6+1:-0.00102, y7+1:-0.00108];[M9+2:-0.00172];[b2+1:-0.00039, b3+1:-0.00013, b4+1:0.00287, b6+1:0.00433, b8+2:-0.00100]}{17048@}{17049@}{17050@}{17051@}	{17045@[y2+1:-1.12, y3+1:-1.02, y4+1:-0.97, y5+1:-0.86, y6+1:-1.30, y7+1:-1.20];[M9+2:-1.43];[b2+1:-1.14, b3+1:-0.30, b4+1:4.85, b6+1:5.19, b8+2:-0.91]}{17048@}{17049@}{17050@}{17051@}	{17045@[y2+1:51715, y3+1:62149, y4+1:221692, y5+1:274772, y6+1:339451, y7+1:253228];[M9+2:1442836];[b2+1:27235, b3+1:25249, b4+1:35697, b6+1:35556, b8+2:47709]}{17048@}{17049@}{17050@}{17051@}	{17045@12}{17048@0}{17049@0}{17050@0}{17051@0}		40.3859	157.999	4	2;1	3	14	3	T	0	0	0	22.0318	947.567	48	2;0	2	45	-	T	0	6.22869e-05	3e-06
Z:\FPL_users\Raw_files_FPL\Eclipse\2023\Zheng\20230130_ZS_WP_xlms\20230116_Eclipse_ZS_WP_denv_rNS1_hdl_1_5_R1.raw	19257	19209	669.337	5	3341.65	Intra	K;K		ApoA1	206	ApoA1	219	LAEYHAKATEHLSTLSEK	LAEYHAKATEHLSTLSEK(7)	2027.03	14.1144	{19257@[b5+1];[y6+1, y7+1, y8+1, y13+2, y13+2, y14+2, y14+2, y15+3, y15+2, y16+2, y16+2];[M18+2, M18+3]}{19262@[b5+1, b8+1]}{19263@[y3+1, y4+1, y8+1, y11+1, y12+1, y14+1];[b6+1, b7+1, b10+1]}{19264@}{19265@[b1+1, b3+1, b8+1]}	{19257@[b5+1:614.29724];[y6+1:664.35321, y7+1:777.43766, y8+1:914.49683, y13+2:734.88830, y13+2:750.87419, y14+2:803.41685, y14+2:819.40386, y15+3:590.30206, y15+2:900.93545, y16+2:949.47083, y16+2:965.45721];[M18+2:1041.53194, M18+3:705.34778]}{19262@[b5+1:614.29004, b8+1:938.47607]}{19263@[y3+1:363.18402, y4+1:476.26300, y8+1:914.50602, y11+1:1215.61597, y12+1:1429.71204, y14+1:1637.79297];[b6+…	{19257@[b5+1:0.00395];[y6+1:0.00201, y7+1:0.00240, y8+1:0.00265, y13+2:0.00513, y13+2:0.00484, y14+2:0.00332, y14+2:0.00526, y15+3:0.00519, y15+2:0.00510, y16+2:0.00536, y16+2:0.00604];[M18+2:0.00639, M18+3:0.00651]}{19262@[b5+1:-0.00325, b8+1:0.00304]}{19263@[y3+1:-0.00340, y4+1:-0.00849, y8+1:0.01185, y11+1:-0.00559, y12+1:0.01288, y14+1:-0.00221];[b6+1:-0.00541, b7+1:0.01305, b10+1:-0.00438]}{…	{19257@[b5+1:6.45];[y6+1:3.04, y7+1:3.09, y8+1:2.91, y13+2:3.49, y13+2:3.22, y14+2:2.07, y14+2:3.21, y15+3:2.93, y15+2:2.83, y16+2:2.83, y16+2:3.13];[M18+2:3.07, M18+3:3.08]}{19262@[b5+1:-5.30, b8+1:3.24]}{19263@[y3+1:-9.40, y4+1:-17.86, y8+1:12.97, y11+1:-4.60, y12+1:9.01, y14+1:-1.35];[b6+1:-7.91, b7+1:14.53, b10+1:-3.65]}{19264@}{19265@[b1+1:159.15, b3+1:45.79, b8+1:14.30]}	{19257@[b5+1:452425];[y6+1:249191, y7+1:788068, y8+1:288743, y13+2:504083, y13+2:335871, y14+2:644460, y14+2:363618, y15+3:259857, y15+2:272846, y16+2:483740, y16+2:333035];[M18+2:502116, M18+3:12478928]}{19262@[b5+1:28975, b8+1:12830]}{19263@[y3+1:49497, y4+1:15013, y8+1:20140, y11+1:14246, y12+1:13308, y14+1:20035];[b6+1:13308, b7+1:14246, b10+1:20140]}{19264@}{19265@[b1+1:5596, b3+1:39669, b8+…	{19257@14}{19262@2}{19263@9}{19264@0}{19265@3}		35.2665	157.996	41	2;2	4	5	1	T	0	0	0	21.1972	158.001	39	2;2	4	22	26	T	0	0	0
Z:\FPL_users\Raw_files_FPL\Eclipse\2023\Zheng\20230130_ZS_WP_xlms\20230116_Eclipse_ZS_WP_denv_rNS1_hdl_1_5_R1.raw	17958	17956	537.269	2	1072.52	Intra	K;K		ApoA1	206	ApoA1	219	LAEYHAK	LAEYHAK(7)	830.429	11.0922	{17958@[y1+1, y4+1, y4+1, y5+1, y5+1, y6+1, y6+1];[b2+1, b6+1];[M7+1, M7+1]}{17959@}{17960@[b3+1]}{17961@[b3+1]}{17962@[y1+1];[b6+1]}	{17958@[y1+1:201.12276, y4+1:572.28168, y4+1:604.25312, y5+1:701.32373, y5+1:733.29574, y6+1:772.36161, y6+1:804.33178];[b2+1:185.12790, b6+1:685.32874];[M7+1:885.44457, M7+1:917.41641]}{17959@}{17960@[b3+1:314.16702]}{17961@[b3+1:314.16602]}{17962@[y1+1:201.12506];[b6+1:685.32674]}	{17958@[y1+1:-0.00061, y4+1:-0.00104, y4+1:-0.00168, y5+1:-0.00158, y5+1:-0.00165, y6+1:-0.00082, y6+1:-0.00273];[b2+1:-0.00056, b6+1:-0.00167];[M7+1:-0.00192, M7+1:-0.00216]}{17959@}{17960@[b3+1:-0.00402]}{17961@[b3+1:-0.00503]}{17962@[y1+1:0.00170];[b6+1:-0.00366]}	{17958@[y1+1:-3.03, y4+1:-1.82, y4+1:-2.78, y5+1:-2.26, y5+1:-2.25, y6+1:-1.06, y6+1:-3.40];[b2+1:-3.01, b6+1:-2.43];[M7+1:-2.17, M7+1:-2.36]}{17959@}{17960@[b3+1:-12.85]}{17961@[b3+1:-16.07]}{17962@[y1+1:8.48];[b6+1:-5.35]}	{17958@[y1+1:50171, y4+1:138188, y4+1:172836, y5+1:766142, y5+1:1001331, y6+1:310608, y6+1:417836];[b2+1:226538, b6+1:68715];[M7+1:398835, M7+1:1161041]}{17959@}{17960@[b3+1:10272]}{17961@[b3+1:1791]}{17962@[y1+1:8639];[b6+1:8639]}	{17958@11}{17959@0}{17960@1}{17961@1}{17962@2}		30.3335	-914.526	11	2;2	4	21	8	T	0	0	0	40.3859	157.999	4	2;1	3	14	3	T	0	0	0
Z:\FPL_users\Raw_files_FPL\Eclipse\2023\Zheng\20230130_ZS_WP_xlms\20230116_Eclipse_ZS_WP_denv_rNS1_hdl_1_5_R1.raw	20246	20222	608.518	5	3037.55	Intra	K;K		ApoA1	206	ApoA1	142	QKVEPLRAELQEGAR	QKVEPLRAELQEGAR(2)	1722.94	8.14394	{20246@[y4+1, y5+1, y6+1, y8+1, y11+2, y12+2, y13+2];[M15+3]}{20255@[b10+1];[y1+1]}{20256@}{20257@[y6+1]}{20258@}	{20246@[y4+1:432.22134, y5+1:560.28198, y6+1:673.36311, y8+1:873.44312, y11+2:620.34441, y12+2:684.86589, y13+2:734.40027];[M15+3:593.32355]}{20255@[b10+1:1250.65906];[y1+1:175.08684]}{20256@}{20257@[y6+1:673.36301]}{20258@}	{20246@[y4+1:0.00122, y5+1:0.00328, y6+1:0.00035, y8+1:0.00064, y11+2:0.00112, y12+2:0.00150, y13+2:0.00185];[M15+3:0.00057]}{20255@[b10+1:0.00288];[y1+1:-0.03211]}{20256@}{20257@[y6+1:0.00025]}{20258@}	{20246@[y4+1:2.83, y5+1:5.87, y6+1:0.52, y8+1:0.74, y11+2:0.91, y12+2:1.10, y13+2:1.26];[M15+3:0.32]}{20255@[b10+1:2.31];[y1+1:-184.45]}{20256@}{20257@[y6+1:0.37]}{20258@}	{20246@[y4+1:120332, y5+1:186673, y6+1:237686, y8+1:129285, y11+2:2997240, y12+2:1962484, y13+2:2564053];[M15+3:3748186]}{20255@[b10+1:833];[y1+1:1339]}{20256@}{20257@[y6+1:1916]}{20258@}	{20246@8}{20255@2}{20256@0}{20257@1}{20258@0}		28.2884	157.997	3	1;1	2	21	2	T	0	0	0	35.2665	157.996	41	2;2	4	5	1	T	0	0	0
Z:\FPL_users\Raw_files_FPL\Eclipse\2023\Zheng\20230130_ZS_WP_xlms\20230116_Eclipse_ZS_WP_denv_rNS1_R1.raw	15718	15671	684.337	2	1366.66	Intra	K;S		NS1	101	NS1	2	DSGCVVSWK	DSGC[Common Fixed:Carbamidomethyl on C]VVSWK(2)	1036.46	12.0928	{15718@[y2+1, y3+1, y3+1, y4+1, y5+1, y6+1, y7+1];[b4+1, b5+1, b6+1];[M9+1, M9+1]}{15720@[b6+1]}{15721@[b6+1]}{15722@}{15723@}	{15718@[y2+1:333.18961, y3+1:420.22330, y3+1:420.22810, y4+1:519.29186, y5+1:618.35899, y6+1:778.39478, y7+1:835.40972];[b4+1:474.12833, b5+1:573.19623, b6+1:672.26398];[M9+1:1091.47873, M9+1:1123.44864]}{15720@[b6+1:672.26959]}{15721@[b6+1:672.26378]}{15722@}{15723@}	{15718@[y2+1:-0.00251, y3+1:-0.00085, y3+1:0.00396, y4+1:-0.00070, y5+1:-0.00199, y6+1:0.00315, y7+1:-0.00337];[b4+1:-0.00059, b5+1:-0.00111, b6+1:-0.00177];[M9+1:-0.00389, M9+1:-0.00606]}{15720@[b6+1:0.00384]}{15721@[b6+1:-0.00197]}{15722@}{15723@}	{15718@[y2+1:-7.56, y3+1:-2.02, y3+1:9.44, y4+1:-1.35, y5+1:-3.22, y6+1:4.06, y7+1:-4.04];[b4+1:-1.26, b5+1:-1.93, b6+1:-2.64];[M9+1:-3.56, M9+1:-5.40]}{15720@[b6+1:5.73]}{15721@[b6+1:-2.93]}{15722@}{15723@}	{15718@[y2+1:36423, y3+1:240405, y3+1:23088, y4+1:99824, y5+1:65645, y6+1:25568, y7+1:87849];[b4+1:18526, b5+1:41587, b6+1:98563];[M9+1:616442, M9+1:118265]}{15720@[b6+1:195]}{15721@[b6+1:114]}{15722@}{15723@}	{15718@12}{15720@1}{15721@1}{15722@0}{15723@0}		30.2084	-529.275	5	2;2	4	23	1	T	0	0	0	52.2202	-1402.8	28	1;2	3	42	25	T	0	0.515919	0.014518
Z:\FPL_users\Raw_files_FPL\Eclipse\2023\Zheng\20230130_ZS_WP_xlms\20230116_Eclipse_ZS_WP_denv_rNS1_hdl_1_5_R1.raw	20165	20094	501.007	4	2000	Intra	K;K		ApoA1	219	ApoA1	232	AKPALEDLR	AKPALEDLR(2)	1011.57	15.2425	{20165@[b2+1, b2+1, b5+1, b7+1, b7+1];[y2+1, y3+1, y4+1, y4+2, y5+1, y6+1, y7+2, y7+3];[M9+2, M9+2]}{20166@}{20167@}{20168@[y7+1];[b2+1]}{20169@[y2+1];[b7+1]}	{20165@[b2+1:254.15019, b2+1:286.12207, b5+1:535.32452, b7+1:779.39423, b7+1:811.36591];[y2+1:288.20326, y3+1:403.23044, y4+1:532.27319, y4+2:266.63743, y5+1:645.35729, y6+1:716.39447, y7+2:407.22717, y7+3:271.81902];[M9+2:533.79861, M9+2:549.78478]}{20166@}{20167@}{20168@[y7+1:813.44860];[b2+1:254.14880]}{20169@[y2+1:288.20605];[b7+1:811.36375]}	{20165@[b2+1:0.00028, b2+1:0.00008, b5+1:0.00067, b7+1:0.00084, b7+1:0.00043];[y2+1:0.00025, y3+1:0.00048, y4+1:0.00064, y4+2:-0.00498, y5+1:0.00067, y6+1:0.00074, y7+2:0.00058, y7+3:-0.00397];[M9+2:0.00081, M9+2:0.00106]}{20166@}{20167@}{20168@[y7+1:0.00210];[b2+1:-0.00111]}{20169@[y2+1:0.00304];[b7+1:-0.00173]}	{20165@[b2+1:1.10, b2+1:0.27, b5+1:1.25, b7+1:1.07, b7+1:0.54];[y2+1:0.86, y3+1:1.19, y4+1:1.20, y4+2:-9.37, y5+1:1.04, y6+1:1.03, y7+2:0.71, y7+3:-4.89];[M9+2:0.76, M9+2:0.97]}{20166@}{20167@}{20168@[y7+1:2.59];[b2+1:-4.39]}{20169@[y2+1:10.58];[b7+1:-2.13]}	{20165@[b2+1:975808, b2+1:409656, b5+1:71831, b7+1:84510, b7+1:60407];[y2+1:1168358, y3+1:165427, y4+1:474077, y4+2:144308, y5+1:821987, y6+1:365923, y7+2:5557658, y7+3:1065597];[M9+2:3201908, M9+2:388371]}{20166@}{20167@}{20168@[y7+1:64950];[b2+1:79718]}{20169@[y2+1:5957];[b7+1:5957]}	{20165@15}{20166@0}{20167@0}{20168@2}{20169@2}		31.449	158.001	6	2;2	4	3	4	T	0	0	0	30.3335	-914.526	11	2;2	4	21	8	T	0	0	0
Z:\FPL_users\Raw_files_FPL\Eclipse\2023\Zheng\20230130_ZS_WP_xlms\20230116_Eclipse_ZS_WP_denv_rNS1_hdl_1_5_R1.raw	19958	19907	704.508	6	4221	Intra	K;K		ApoA1	219	ApoA1	112	ETEGLRQEMSKDLEEVK	ETEGLRQEM[Common Variable:Oxidation on M]SKDLEEVK(11)	2035.97	9.0397	{19958@[y4+1, y5+1, y6+1, y12+2, y12+2, y14+2, y14+2];[M17+2];[b8+4]}{19964@}{19965@}{19966@}{19967@}	{19958@[y4+1:504.26511, y5+1:617.35071, y6+1:732.37543, y12+2:781.37805, y12+2:797.36485, y14+2:866.43193, y14+2:882.41588];[M17+2:1061.98112];[b8+4:236.61871]}{19964@}{19965@}{19966@}{19967@}	{19958@[y4+1:-0.00130, y5+1:0.00024, y6+1:-0.00199, y12+2:-0.00382, y12+2:-0.00231, y14+2:-0.00158, y14+2:-0.00577];[M17+2:-0.00816];[b8+4:0.00506]}{19964@}{19965@}{19966@}{19967@}	{19958@[y4+1:-2.58, y5+1:0.39, y6+1:-2.71, y12+2:-2.45, y12+2:-1.45, y14+2:-0.91, y14+2:-3.27];[M17+2:-3.85];[b8+4:5.37]}{19964@}{19965@}{19966@}{19967@}	{19958@[y4+1:19245, y5+1:15286, y6+1:49104, y12+2:60574, y12+2:39541, y14+2:22214, y14+2:13268];[M17+2:16390];[b8+4:62451]}{19964@}{19965@}{19966@}{19967@}	{19958@9}{19964@0}{19965@0}{19966@0}{19967@0}		31.2104	157.996	17	2;1	3	3	27	T	0	0	0	28.2884	157.997	3	1;1	2	21	2	T	0	0	0
Z:\FPL_users\Raw_files_FPL\Eclipse\2023\Zheng\20230130_ZS_WP_xlms\20230116_Eclipse_ZS_WP_denv_rNS1_R1.raw	7527	7520	631.986	3	1892.94	Intra	K;K		NS1	101	NS1	101	GIMQAGKR	GIM[Common Variable:Oxidation on M]QAGKR(7)	875.465	8.06094	{7527@[b3+1, b3+2, b5+1, b7+1];[y6+1, y6+2];[M8+1, M8+1]}{7529@[y2+1, y5+1];[b3+1, b6+1]}{7530@[b4+1, b4+1, b5+1];[y3+1, y4+1, y4+1]}{7531@[y5+1]}{7532@}	{7527@[b3+1:318.14737, b3+2:159.57915, b5+1:517.24413, b7+1:756.36884];[y6+1:760.37542, y6+2:396.67722];[M8+1:930.48010, M8+1:962.45157]}{7529@[y2+1:357.22006, y5+1:613.34278];[b3+1:318.14502, b6+1:574.26774]}{7530@[b4+1:446.20300, b4+1:446.21181, b5+1:517.24799];[y3+1:446.21181, y4+1:517.24799, y4+1:517.25680]}{7531@[y5+1:613.33704]}{7532@}	{7527@[b3+1:-0.00083, b3+2:0.00282, b5+1:0.00024, b7+1:-0.00205];[y6+1:-0.00161, y6+2:-0.00195];[M8+1:-0.00246, M8+1:-0.00306]}{7529@[y2+1:-0.00441, y5+1:0.00115];[b3+1:-0.00318, b6+1:0.00238]}{7530@[b4+1:-0.00378, b4+1:0.00503, b5+1:0.00409];[y3+1:-0.00620, y4+1:-0.00715, y4+1:0.00166]}{7531@[y5+1:-0.00459]}{7532@}	{7527@[b3+1:-2.63, b3+2:8.91, b5+1:0.46, b7+1:-2.71];[y6+1:-2.11, y6+2:-2.47];[M8+1:-2.64, M8+1:-3.19]}{7529@[y2+1:-12.39, y5+1:1.88];[b3+1:-10.04, b6+1:4.15]}{7530@[b4+1:-8.49, b4+1:11.30, b5+1:7.92];[y3+1:-13.94, y4+1:-13.84, y4+1:3.22]}{7531@[y5+1:-7.50]}{7532@}	{7527@[b3+1:13937, b3+2:35043, b5+1:24829, b7+1:9479];[y6+1:24921, y6+2:23079];[M8+1:67367, M8+1:15021]}{7529@[y2+1:271, y5+1:121];[b3+1:121, b6+1:271]}{7530@[b4+1:460, b4+1:517, b5+1:517];[y3+1:517, y4+1:517, y4+1:460]}{7531@[y5+1:1016]}{7532@}	{7527@8}{7529@4}{7530@6}{7531@1}{7532@0}		29.2469	158.003	33	2;2	4	1	2	T	0	0	0	44.2908	-1402.8	24	2;2	4	1	2	T	0	0	0
Z:\FPL_users\Raw_files_FPL\Eclipse\2023\Zheng\20230130_ZS_WP_xlms\20230116_Eclipse_ZS_WP_denv_rNS1_R1.raw	13255	13248	690.983	3	2069.93	Intra	K;S		NS1	101	NS1	2	DSGCVVSWK	DSGC[Common Fixed:Carbamidomethyl on C]VVSWK(2)	1036.46	9.07304	{13255@[y2+1, y3+1, y4+1, y5+1, y7+1];[b5+1, b6+1];[M9+1, M9+1]}{13257@[y4+1]}{13258@}{13259@}{13260@}	{13255@[y2+1:333.18997, y3+1:420.22296, y4+1:519.29132, y5+1:618.35974, y7+1:835.41015];[b5+1:573.19611, b6+1:672.26355];[M9+1:1091.47846, M9+1:1123.45080]}{13257@[y4+1:519.30206]}{13258@}{13259@}{13260@}	{13255@[y2+1:-0.00215, y3+1:-0.00118, y4+1:-0.00124, y5+1:-0.00123, y7+1:-0.00294];[b5+1:-0.00123, b6+1:-0.00220];[M9+1:-0.00416, M9+1:-0.00390]}{13257@[y4+1:0.00950]}{13258@}{13259@}{13260@}	{13255@[y2+1:-6.46, y3+1:-2.82, y4+1:-2.39, y5+1:-2.00, y7+1:-3.52];[b5+1:-2.15, b6+1:-3.27];[M9+1:-3.81, M9+1:-3.47]}{13257@[y4+1:18.34]}{13258@}{13259@}{13260@}	{13255@[y2+1:5931, y3+1:30482, y4+1:18192, y5+1:10600, y7+1:12427];[b5+1:5158, b6+1:13244];[M9+1:132302, M9+1:27120]}{13257@[y4+1:47]}{13258@}{13259@}{13260@}	{13255@9}{13257@1}{13258@0}{13259@0}{13260@0}		28.183	157.999	10	2;2	4	29	2	T	0	0	0	42.2138	158.002	49	2;2	4	14	7	T	0	4.70877e-06	0
Z:\FPL_users\Raw_files_FPL\Eclipse\2023\Zheng\20230130_ZS_WP_xlms\20230116_Eclipse_ZS_WP_denv_rNS1_hdl_1_5_R1.raw	32956	32934	1120.25	3	3357.74	Intra	K;K		ApoA1	250	ApoA1	263	KLNTQ	KLNTQ(1)	602.339	7.07033	{32956@[b3+1, b3+1, b4+1, b4+1];[y3+1];[M5+1, M5+1]}{32957@}{32958@}{32959@[y2+1]}{32960@}	{32956@[b3+1:410.23901, b3+1:442.21115, b4+1:511.28667, b4+1:543.25860];[y3+1:362.16623];[M5+1:657.35553, M5+1:689.32747]}{32957@}{32958@}{32959@[y2+1:248.12302]}{32960@}	{32956@[b3+1:-0.00078, b3+1:-0.00072, b4+1:-0.00080, b4+1:-0.00095];[y3+1:-0.00080];[M5+1:-0.00108, M5+1:-0.00122]}{32957@}{32958@}{32959@[y2+1:-0.00108]}{32960@}	{32956@[b3+1:-1.90, b3+1:-1.63, b4+1:-1.56, b4+1:-1.74];[y3+1:-2.20];[M5+1:-1.65, M5+1:-1.77]}{32957@}{32958@}{32959@[y2+1:-4.37]}{32960@}	{32956@[b3+1:216271, b3+1:172063, b4+1:505119, b4+1:323911];[y3+1:106109];[M5+1:3628058, M5+1:2485149]}{32957@}{32958@}{32959@[y2+1:12217]}{32960@}	{32956@7}{32957@0}{32958@0}{32959@1}{32960@0}		38.2348	158.002	26	0;2	2	-	28	T	0	0	0	31.449	158.001	6	2;2	4	3	4	T	0	0	0
Z:\FPL_users\Raw_files_FPL\Eclipse\2023\Zheng\20230130_ZS_WP_xlms\20230116_Eclipse_ZS_WP_denv_rNS1_hdl_1_5_R1.raw	32509	32502	1256.66	3	3766.97	Intra	K;K		ApoA1	250	ApoA1	232	AKPALEDLR	AKPALEDLR(2)	1011.57	3.09637	{32509@[y7+1];[M9+1, M9+1]}{32511@}{32512@}{32513@}{32514@}	{32509@[y7+1:813.44606];[M9+1:1066.58667, M9+1:1098.55854]}{32511@}{32512@}{32513@}{32514@}	{32509@[y7+1:-0.00043];[M9+1:-0.00246, M9+1:-0.00267]}{32511@}{32512@}{32513@}{32514@}	{32509@[y7+1:-0.53];[M9+1:-2.31, M9+1:-2.44]}{32511@}{32512@}{32513@}{32514@}	{32509@[y7+1:51653];[M9+1:545245, M9+1:102395]}{32511@}{32512@}{32513@}{32514@}	{32509@3}{32511@0}{32512@0}{32513@0}{32514@0}		17.3422	157.998	20	2;2	4	5	133	T	0.009174	0	0	31.2104	157.996	17	2;1	3	3	27	T	0	0	0
Z:\FPL_users\Raw_files_FPL\Fusion Lumos\2023\Zheng\20230111_WP_sNS1_xlms\20230110_SZ_WP_DENV_rNS1_HDL_1_1_R1.raw	22540	22466	641.622	3	1921.84	Inter	T;K		ApoA1	261	NS1	48	LASAIQK	LAS[DSSO:DSSO_loop_S on S]AIQK(7)	887.442	2.02567	{22540@[M7+1, M7+1]}{22542@}{22543@}{22544@}{22545@}	{22540@[M7+1:942.45583, M7+1:974.42826]}{22542@}{22543@}{22544@}{22545@}	{22540@[M7+1:-0.00430, M7+1:-0.00395]}{22542@}{22543@}{22544@}{22545@}	{22540@[M7+1:-4.56, M7+1:-4.05]}{22542@}{22543@}{22544@}{22545@}	{22540@[M7+1:186274, M7+1:308266]}{22542@}{22543@}{22544@}{22545@}	{22540@2}{22542@0}{22543@0}{22544@0}{22545@0}		24.1723	-479.401	80	2;2	4	1	77	T	0	0	0	38.2348	158.002	26	0;2	2	-	28	T	0	0	0
Z:\FPL_users\Raw_files_FPL\Fusion Lumos\2023\Zheng\20230111_WP_sNS1_xlms\20230110_SZ_WP_DENV_rNS1_HDL_1_1_R2.raw	22145	22049	708.114	4	2828.43	Intra	T;K		ApoA1	261	ApoA1	206	LEALKENGGAR	LEALKENGGAR(5)	1156.62	15.0551	{22145@[b2+1, b3+1, b4+1, b5+1, b5+1, b6+1];[y4+1, y5+1, y6+1, y7+1, y8+1, y9+1, y9+1];[M11+1, M11+2]}{22148@[b2+1];[y4+1, y7+1, y8+1]}{22149@[b2+1];[y9+1]}{22150@}{22151@[y7+1]}	{22145@[b2+1:243.13420, b3+1:314.17279, b4+1:427.25513, b5+1:609.36108, b5+1:641.33557, b6+1:738.40247];[y4+1:360.19873, y5+1:474.24307, y6+1:603.28474, y7+1:817.35992, y8+1:898.47845, y9+1:969.51233, y9+1:1001.48202];[M11+1:1211.63843, M11+2:622.30904]}{22148@[b2+1:243.13334];[y4+1:360.20001, y7+1:785.40003, y8+1:898.46527]}{22149@[b2+1:243.13333];[y9+1:1001.46517]}{22150@}{22151@[y7+1:785.39996…	{22145@[b2+1:0.00027, b3+1:0.00174, b4+1:0.00002, b5+1:0.00045, b5+1:0.00286, b6+1:-0.00076];[y4+1:-0.00026, y5+1:0.00115, y6+1:0.00022, y7+1:-0.00219, y8+1:0.00435, y9+1:0.00111, y9+1:-0.00128];[M11+1:0.00056, M11+2:0.00085]}{22148@[b2+1:-0.00059];[y4+1:0.00102, y7+1:0.01000, y8+1:-0.00883]}{22149@[b2+1:-0.00061];[y9+1:-0.01812]}{22150@}{22151@[y7+1:0.00992]}	{22145@[b2+1:1.10, b3+1:5.57, b4+1:0.04, b5+1:0.74, b5+1:4.46, b6+1:-1.03];[y4+1:-0.73, y5+1:2.43, y6+1:0.37, y7+1:-2.69, y8+1:4.85, y9+1:1.15, y9+1:-1.28];[M11+1:0.46, M11+2:0.68]}{22148@[b2+1:-2.45];[y4+1:2.84, y7+1:12.75, y8+1:-9.84]}{22149@[b2+1:-2.51];[y9+1:-18.12]}{22150@}{22151@[y7+1:12.65]}	{22145@[b2+1:11160, b3+1:10727, b4+1:14908, b5+1:16989, b5+1:8760, b6+1:11469];[y4+1:9493, y5+1:23379, y6+1:74115, y7+1:18976, y8+1:14672, y9+1:33023, y9+1:15133];[M11+1:13743, M11+2:244666]}{22148@[b2+1:1418];[y4+1:205, y7+1:2259, y8+1:1510]}{22149@[b2+1:802];[y9+1:603]}{22150@}{22151@[y7+1:549]}	{22145@15}{22148@4}{22149@2}{22150@0}{22151@1}		42.1409	158.006	1	1;2	3	5	3	T	0	2.5e-06	0	17.3422	157.998	20	2;2	4	5	133	T	0.00917431	0	0
Z:\FPL_users\Raw_files_FPL\Fusion Lumos\2023\Zheng\20230111_WP_sNS1_xlms\20230110_SZ_WP_DENV_rNS1_HDL_1_1_R1.raw	22511	22390	641.622	3	1921.84	Inter	K;K		ApoA1	262	NS1	48	LASAIQK	LAS[DSSO:DSSO_loop_S on S]AIQK(7)	887.442	3.01768	{22511@[b6+1];[M7+1, M7+1]}{22518@[b6+1]}{22519@[y5+1]}{22520@}{22521@}	{22511@[b6+1:742.34149];[M7+1:942.45778, M7+1:974.42877]}{22518@[b6+1:742.33337]}{22519@[y5+1:758.33337]}{22520@}{22521@}	{22511@[b6+1:-0.00255];[M7+1:-0.00234, M7+1:-0.00343]}{22518@[b6+1:-0.01067]}{22519@[y5+1:-0.00558]}{22520@}{22521@}	{22511@[b6+1:-3.43];[M7+1:-2.49, M7+1:-3.53]}{22518@[b6+1:-14.40]}{22519@[y5+1:-7.37]}{22520@}{22521@}	{22511@[b6+1:57506];[M7+1:288292, M7+1:346924]}{22518@[b6+1:139]}{22519@[y5+1:473]}{22520@}{22521@}	{22511@3}{22518@1}{22519@1}{22520@0}{22521@0}		33.1083	-479.401	21	2;2	4	2	51	T	0	0.000182	7e-06	42.1409	158.006	1	1;2	3	5	3	T	0	2.5034e-06	0
Z:\FPL_users\Raw_files_FPL\Eclipse\2023\Zheng\20230130_ZS_WP_xlms\20230116_Eclipse_ZS_WP_denv_rNS1_R1.raw	13480	13450	631.082	4	2520.3	Intra	K;K		NS1	112	NS1	11	NKELK	NKELK(2)	630.37	11.0983	{13480@[b2+1, b2+1, b3+1, b3+1, b4+1];[y2+1, y2+3, y3+1, y4+1];[M5+1, M5+1]}{13482@}{13483@}{13484@}{13485@}	{13480@[b2+1:297.15506, b2+1:329.12741, b3+1:426.19675, b3+1:458.16940, b4+1:571.25287];[y2+1:260.19617, y2+3:87.40241, y3+1:389.23892, y4+1:571.34467];[M5+1:685.38652, M5+1:717.35846]}{13482@}{13483@}{13484@}{13485@}	{13480@[b2+1:-0.00067, b2+1:-0.00040, b3+1:-0.00157, b3+1:-0.00100, b4+1:-0.00160];[y2+1:-0.00070, y2+3:-0.00418, y3+1:-0.00054, y4+1:-0.00032];[M5+1:-0.00139, M5+1:-0.00153]}{13482@}{13483@}{13484@}{13485@}	{13480@[b2+1:-2.25, b2+1:-1.21, b3+1:-3.70, b3+1:-2.18, b4+1:-2.80];[y2+1:-2.71, y2+3:-16.13, y3+1:-1.39, y4+1:-0.56];[M5+1:-2.03, M5+1:-2.14]}{13482@}{13483@}{13484@}{13485@}	{13480@[b2+1:8372, b2+1:3677, b3+1:7508, b3+1:5657, b4+1:4462];[y2+1:13586, y2+3:24141, y3+1:9351, y4+1:9911];[M5+1:105968, M5+1:323244]}{13482@}{13483@}{13484@}{13485@}	{13480@11}{13482@0}{13483@0}{13484@0}{13485@0}		42.3185	157.999	20	2;2	4	5	85	T	0	0	0	39.3191	158.004	49	2;2	4	10	71	T	0	2.65241e-05	1e-06
							Total 78 rows
							rsNS1:ApoA1	9
							ApoA1:ApoA1	45
							NS1:NS1	24
							Total	78
