# Supplementary material for: Secreted dengue virus NS1 from infection is predominantly dimeric and in complex with high-density lipoprotein
Source: eLife. 2024 May 24;12:RP90762. doi: 10.7554/eLife.90762 (PMC11126310; doi:10.7554/eLife.90762)
Supplement: Supplementary file 5. [file elife-90762-supp5.xlsx]

## Sheet: Sheet1
Summary of the sheets
No	Name of the sheet	Explanation
1	rNS1_7wuv_hexamer_xlink_distanc	Crosslinks distances between C-alphas when the identfied links are mapped on the hexamer model 7wuv
2	rNS1_7wuu_loose_tetramer_xlinks	Crosslinks distances between C-alphas when the identfied links are mapped on the loose tetramer 7wuu
3	rNS1_AF_dimer_xlinks	Crosslinks distances between C-alphas when the identfied links are mapped on the dimer model generated by AlphaFold

## Sheet: rNS1_7wuv_hexamer_xlink_distanc
Chain 1	Residue 1	Chain 2	Residue 2	CA distance	Threshold	Sat-Viol
B	9	A	11	30.4	30	V
B	9	B	11	5.3	30	S
B	9	C	11	31.4	30	V
B	9	D	11	11.6	30	S
B	9	E	11	15.5	30	S
B	9	F	11	26.9	30	S
B	9	A	116	30	30	S
B	9	B	116	51.4	30	V
B	9	C	116	38.7	30	V
B	9	D	116	50.1	30	V
B	9	E	116	55.9	30	V
B	9	F	116	33.9	30	V
B	9	A	120	29.4	30	S
B	9	B	120	48	30	V
B	9	C	120	38.1	30	V
B	9	D	120	45.1	30	V
B	9	E	120	51.8	30	V
B	9	F	120	31.6	30	V
B	9	A	101	45.3	30	V
B	9	B	101	53.1	30	V
B	9	C	101	54.4	30	V
B	9	D	101	54.4	30	V
B	9	E	101	60.8	30	V
B	9	F	101	52.5	30	V
B	11	A	11	27.8	30	S
B	11	B	11	0	30	S
B	11	C	11	26.4	30	S
B	11	D	11	9.8	30	S
B	11	E	11	17.9	30	S
B	11	F	11	22.9	30	S
B	41	A	11	28.6	30	S
B	41	B	11	52.8	30	V
B	41	C	11	48.8	30	V
B	41	D	11	55.4	30	V
B	41	E	11	51.3	30	V
B	41	F	11	44.5	30	V
B	48	A	122	84.5	30	V
B	48	B	122	27.8	30	S
B	48	C	122	87.2	30	V
B	48	D	122	58.1	30	V
B	48	E	122	82.5	30	V
B	48	F	122	45.7	30	V
B	48	A	116	77.8	30	V
B	48	B	116	19.3	30	S
B	48	C	116	92	30	V
B	48	D	116	65	30	V
B	48	E	116	72.6	30	V
B	48	F	116	56.6	30	V
B	94	A	116	62.3	30	V
B	94	B	116	31.7	30	V
B	94	C	116	76.2	30	V
B	94	D	116	68.4	30	V
B	94	E	116	73.2	30	V
B	94	F	116	32.7	30	V
B	94	A	2	33.3	30	V
B	94	B	2	39.2	30	V
B	94	C	2	56.2	30	V
B	94	D	2	57.3	30	V
B	94	E	2	40.1	30	V
B	94	F	2	45.9	30	V
B	94	A	120	65.5	30	V
B	94	B	120	29	30	S
B	94	C	120	71.9	30	V
B	94	D	120	61.9	30	V
B	94	E	120	74.9	30	V
B	94	F	120	24.3	30	S
B	94	A	101	57.9	30	V
B	94	B	101	17.1	30	S
B	94	C	101	93.7	30	V
B	94	D	101	87.1	30	V
B	94	E	101	75.8	30	V
B	94	F	101	37.2	30	V
B	94	A	48	66	30	V
B	94	B	48	25.2	30	S
B	94	C	48	92.8	30	V
B	94	D	48	84.5	30	V
B	94	E	48	81.8	30	V
B	94	F	48	35.5	30	V
B	101	A	101	54.9	30	V
B	101	B	101	0	30	S
B	101	C	101	102.6	30	V
B	101	D	101	87.1	30	V
B	101	E	101	86.8	30	V
B	101	F	101	52.9	30	V
B	101	A	40	67.1	30	V
B	101	B	40	24.3	30	S
B	101	C	40	94.5	30	V
B	101	D	40	71	30	V
B	101	E	40	83.4	30	V
B	101	F	40	49.4	30	V
B	101	A	2	41.1	30	V
B	101	B	2	42.2	30	V
B	101	C	2	63.3	30	V
B	101	D	2	63.2	30	V
B	101	E	2	49.1	30	V
B	101	F	2	57.4	30	V
B	11	A	112	41.6	30	V
B	11	B	112	60	30	V
B	11	C	112	48.7	30	V
B	11	D	112	55.3	30	V
B	11	E	112	62.2	30	V
B	11	F	112	49.1	30	V

## Sheet: rNS1_7wuu_loose_tetramer_xlinks
Chain 1	Residue 1	Chain 2	Residue 2	CA distance	Threshold	Sat-Viol
B	9	A	11	31.1	30	V
B	9	B	11	5.6	30	S
B	9	C	11	19.5	30	S
B	9	D	11	34.3	30	V
B	9	A	116	30.7	30	V
B	9	B	116	53.2	30	V
B	9	C	116	61.4	30	V
B	9	D	116	35.2	30	V
B	9	A	120	33.8	30	V
B	9	B	120	52.4	30	V
B	9	C	120	60.2	30	V
B	9	D	120	31.9	30	V
B	9	A	101	38.8	30	V
B	9	B	101	45.7	30	V
B	9	C	101	65.4	30	V
B	9	D	101	51.3	30	V
B	11	A	11	30.9	30	V
B	11	B	11	0	30	S
B	11	C	11	16.3	30	S
B	11	D	11	32.2	30	V
B	41	A	11	30.1	30	V
B	41	B	11	52.4	30	V
B	41	C	11	55.5	30	V
B	41	D	11	40.3	30	V
B	48	A	122	88.6	30	V
B	48	B	122	26.7	30	S
B	48	C	122	81.4	30	V
B	48	D	122	57.5	30	V
B	48	A	116	82.3	30	V
B	48	B	116	19.3	30	S
B	48	C	116	70.4	30	V
B	48	D	116	68	30	V
B	94	A	116	64.6	30	V
B	94	B	116	35.7	30	V
B	94	C	116	75.4	30	V
B	94	D	116	42.7	30	V
B	94	A	2	32.1	30	V
B	94	B	2	40.2	30	V
B	94	C	2	40	30	V
B	94	D	2	49.4	30	V
B	94	A	120	69.1	30	V
B	94	B	120	33.5	30	V
B	94	C	120	78.3	30	V
B	94	D	120	34.8	30	V
B	94	A	101	59.5	30	V
B	94	B	101	19	30	S
B	94	C	101	80.2	30	V
B	94	D	101	45.7	30	V
B	94	A	48	67	30	V
B	94	B	48	28.6	30	S
B	94	C	48	84.2	30	V
B	94	D	48	46.2	30	V
B	101	A	101	56.3	30	V
B	101	B	101	0	30	S
B	101	C	101	87.3	30	V
B	101	D	101	61.4	30	V
B	101	A	40	67.8	30	V
B	101	B	40	24.3	30	S
B	101	C	40	79.6	30	V
B	101	D	40	58.8	30	V
B	101	A	2	40.7	30	V
B	101	B	2	43.4	30	V
B	101	C	2	47.4	30	V
B	101	D	2	58.9	30	V
B	11	A	112	35.8	30	V
B	11	B	112	61	30	V
B	11	C	112	65.7	30	V
B	11	D	112	45	30	V

## Sheet: rNS1_AF_dimer_xlinks
Chain 1	Residue 1	Chain 2	Residue 2	CA distance	Threshold	Sat-Viol
B	9	A	11	28.4	30	S
B	9	B	11	5.3	30	S
A	9	A	11	5.3	30	S
A	9	B	11	28.4	30	S
B	9	A	116	34.4	30	V
B	9	B	116	58.1	30	V
A	9	A	116	58	30	V
A	9	B	116	34.5	30	V
B	9	A	120	34.4	30	V
B	9	B	120	55.8	30	V
A	9	A	120	55.8	30	V
A	9	B	120	34.5	30	V
B	9	A	101	33	30	V
B	9	B	101	45.9	30	V
A	9	A	101	45.9	30	V
A	9	B	101	33.1	30	V
B	11	A	11	28.9	30	S
B	11	B	11	0	30	S
A	11	A	11	0	30	S
A	11	B	11	28.9	30	S
B	41	A	11	25.5	30	S
B	41	B	11	51.4	30	V
A	41	A	11	51.3	30	V
A	41	B	11	25.4	30	S
B	48	A	122	82.4	30	V
B	48	B	122	24.6	30	S
A	48	A	122	24.6	30	S
A	48	B	122	82.3	30	V
B	48	A	116	88.1	30	V
B	48	B	116	23.8	30	S
A	48	A	116	23.8	30	S
A	48	B	116	88.1	30	V
B	94	A	116	73	30	V
B	94	B	116	35.8	30	V
A	94	A	116	35.9	30	V
A	94	B	116	73.2	30	V
B	94	A	2	33.3	30	V
B	94	B	2	37.8	30	V
A	94	A	2	37.8	30	V
A	94	B	2	33.3	30	V
B	94	A	120	73.4	30	V
B	94	B	120	31.1	30	V
A	94	A	120	31.2	30	V
A	94	B	120	73.5	30	V
B	94	A	101	60.1	30	V
B	94	B	101	18.8	30	S
A	94	A	101	18.8	30	S
A	94	B	101	60.2	30	V
B	94	A	48	66.9	30	V
B	94	B	48	27.5	30	S
A	94	A	48	27.5	30	S
A	94	B	48	67	30	V
B	94	A	9	33	30	V
B	94	B	9	39.2	30	V
A	94	A	9	39.2	30	V
A	94	B	9	32.9	30	V
B	101	A	101	57	30	V
B	101	B	101	0	30	S
A	101	A	101	0	30	S
A	101	B	101	57	30	V
B	101	A	40	67.1	30	V
B	101	B	40	23.6	30	S
A	101	A	40	23.7	30	S
A	101	B	40	67.1	30	V
B	101	A	2	41	30	V
B	101	B	2	40.7	30	V
A	101	A	2	40.6	30	V
A	101	B	2	41	30	V
B	11	A	112	31.3	30	V
B	11	B	112	58.8	30	V
A	11	A	112	58.7	30	V
A	11	B	112	31.4	30	V
