# Supplementary material for: Secreted dengue virus NS1 from infection is predominantly dimeric and in complex with high-density lipoprotein
Source: eLife. 2024 May 24;12:RP90762. doi: 10.7554/eLife.90762 (PMC11126310; doi:10.7554/eLife.90762)
Supplement: Supplementary file 6. [file elife-90762-supp6.xlsx]

## Sheet: NS1c
Table S1. Relative deuterium uptake for different peptides of NS1c in the presence and absence of Fab562 at various labeling times.
				1 min			10 min			100 min
S. No.	Residues	Sequence of NS1c peptides	Num Exchangers	Relative Uptake	± SD		Relative Uptake	± SD		Relative Uptake	± SD
1	174-203	RQDVSCDSKLMSAAIKDNRAVHADMGYWIE	29	-0.305398	0.224879		-0.896738	0.234389		-0.607818	0.160082
2	178-191	SCDSKLMSAAIKDN	13	-0.063682	0.112353		-0.087211	0.049398		-0.093433	0.042842
3	184-200	MSAAIKDNRAVHADMGY	16	-0.473655	0.108721		-0.695594	0.102486		-0.550006	0.101899
4	187-198	AAIKDNRAVHADMGYW	15	-0.159974	0.06577		-0.340462	0.065332		-0.446414	0.046576
5	186-201	AIKDNRAVHADM	11	-0.15859	0.069294		-0.174393	0.054271		-0.122471	0.05917
6	187-200	AIKDNRAVHADMGY	13	-0.235352	0.108365		-0.263717	0.109019		-0.26355	0.11169
7	187-201	AIKDNRAVHADMGYW	14	-0.175745	0.067498		-0.301943	0.04634		-0.21481	0.04973
8	188-200	IKDNRAVHADMGY	12	-0.287582	0.075518		-0.336867	0.084841		-0.350297	0.082979
9	194-219	VHADMGYWIESALNDTWKIEKASFIE	25	-0.246598	0.063451		-0.463657	0.141413		-0.395401	0.110177
10	195-219	HADMGYWIESALNDTWKIEKASFIE	24	-0.318998	0.14301		-0.450388	0.126029		-0.391969	0.076855
11	211-217	KIEKASF	6	0.009171	0.020367		-0.010246	0.037206		0.003775	0.028087
12	214-242	KASFIEVKSCHWPKSHTLWSNGVLESEMI	27	-0.854658	0.128335		-0.961818	0.148904		-0.944465	0.136946
13	231-245	LWSNGVLESEMIIPK	13	-0.281783	0.073001		-0.326849	0.097499		-0.38415	0.088482
14	241-247	EMIIPKNFAGPVSQ	11	-0.084293	0.029735		-0.104919	0.026299		-0.072243	0.039541
15	240-253	MIIPKNF	5	-0.12325	0.068927		-0.080333	0.053818		-0.140744	0.055671
16	241-253	MIIPKNFAGPVSQ	10	-0.107717	0.021191		-0.108886	0.025708		-0.13417	0.028278
17	242-253	MIIPKNFAGPVSQHNYRPGY	16	0.009792	0.058804		-0.108022	0.038839		-0.059987	0.053196
18	241-260	IIPKNFAGPVSQ	9	0.030796	0.135185		-0.041507	0.168164		-0.300769	0.137821
19	242-260	IIPKNFAGPVSQHNYRPGY	15	-0.13007	0.093845		-0.181997	0.123241		-0.141191	0.091031
20	243-260	IPKNFAGPVSQHNYRPGY	14	-0.070088	0.042249		-0.182788	0.067547		-0.323382	0.034886
21	244-260	PKNFAGPVSQHNYRPGY	13	-0.048242	0.071275		-0.056576	0.073534		-0.084582	0.071284
22	246-260	NFAGPVSQHNYRPGY	12	0.013473	0.082297		-0.091529	0.081356		-0.027125	0.087607
23	248-261	AGPVSQHNYRPGYH	11	-0.006696	0.069587		-0.132947	0.067612		-0.173716	0.079896
24	250-262	PVSQHNYRPGYHT	10	-0.155438	0.139963		-0.295458	0.16022		-0.13497	0.162907
25	250-273	PVSQHNYRPGYHTQTAGPWHLGRL	20	-0.076704	0.216588		-0.156113	0.207497		-0.240953	0.234348
26	254-275	HNYRPGYHTQTAGPWHLGRLEM	19	-0.059296	0.042993		-0.068293	0.027389		-0.200107	0.031737
27	261-275	HTQTAGPWHLGRLEM	13	0.02229	0.043579		-0.117382	0.028994		-0.328206	0.11007
28	261-277	HTQTAGPWHLGRLEMDF	15	-0.088999	0.097255		-0.194297	0.071043		-0.073837	0.024813
29	265-275	AGPWHLGRLEM	9	-0.379877	0.05003		-0.26642	0.06716		-0.296372	0.047527
30	267-273	GPWHLGRLEM	8	-0.367357	0.138891		-0.411894	0.151122		-0.524241	0.162217
31	266-275	PWHLGRL	5	-0.120259	0.07802		-0.170848	0.065011		-0.201476	0.071252
32	286-304	VVTEDCGNRGPSLRTTTAS	17	-0.484156	0.111397		-1.03414	0.135673		-0.76793	0.090168
33	299-309	GNRGPSLRTTTASGKLITEWCCRSCTLPPLRYRGED	32	-0.551717	0.144509		-0.980153	0.08004		-0.9152	0.068852
34	299-310	RTTTASGKLIT	10	-0.66335	0.112012		-0.776464	0.094064		-0.493488	0.120779
35	292-327	RTTTASGKLITE	11	-0.607334	0.0859		-0.616975	0.078232		-0.426152	0.077468
36	309-332	TEWCCRSCTLPPLRYRGEDGCWYG	21	-0.293265	0.128194		-0.402644	0.14965		-0.28566	0.174431
37	310-336	EWCCRSCTLPPLRYRGEDGCWYGMEIR	24	-0.244095	0.075479		-0.363645	0.053982		-0.397375	0.061664
38	322-347	RYRGEDGCWYGMEIRPLKEKEENLVN	24	-0.486537	0.186979		-0.874526	0.190449		-0.890463	0.136128
39	334-340	YGMEIRPLKEKEENL	13	-0.132305	0.089299		-0.234065	0.130849		-0.143183	0.084654
40	331-345	YGMEIRPLKEKEENLVN	15	-0.108674	0.166242		-0.320691	0.094481		-0.21449	0.107892
41	332-345	YGMEIRPLKEKEENLVNSL	17	-0.518785	0.152475		-0.571837	0.146521		-0.435179	0.122697
42	331-347	GMEIRPLKEKEENL	12	-0.18106	0.120655		-0.212254	0.098956		-0.210598	0.10818
43	333-345	MEIRPLKEKEENL	11	-0.33299	0.126685		-0.262637	0.091095		-0.197018	0.249213
44	331-349	EIRPLKE	5	-0.089991	0.044812		-0.080681	0.044195		-0.059334	0.044901
45	335-345	EIRPLKEKEENLVNS	13	-0.13544	0.086069		-0.380014	0.09355		-0.275068	0.074758
46	334-348	EIRPLKEKEENLVNSL	14	-0.305476	0.113526		-0.48719	0.074918		-0.363081	0.111501
47	334-349	IRPLKEKEENL	9	-0.256076	0.100903		-0.332214	0.091973		-0.336929	0.088975
48	335-348	IRPLKEKEENLVNS	12	-0.168451	0.10252		-0.324502	0.089216		-0.298654	0.083762
49	335-349	IRPLKEKEENLVNSL	13	-0.268492	0.078221		-0.503152	0.095185		-0.44196	0.129777
50	335-351	IRPLKEKEENLVNSLVT	15	-0.483419	0.121215		-0.466724	0.222352		-0.464072	0.123859
51	341-348	KEENLVNS	7	-0.087153	0.041956		-0.258342	0.050355		-0.201016	0.039568
52	341-349	KEENLVNSL	8	-0.228011	0.120184		-0.286969	0.056415		-0.202437	0.051988
53	345-361	LVNSLVTAGTKHHHHHH	16	-0.070368	0.074293		-0.182021	0.088005		0.057968	0.073048
54	348-361	SLVTAGTKHHHHHH	13	0.183961	0.102304		0.036748	0.09418		0.048759	0.04204

## Sheet: Fab562
Table S2. Relative deuterium uptake for different peptides of Fab562 in the presence and absence of NS1c at various labeling times.
				1 min			10 min			100 min							1 min			10 min			100 min
S.No.	Residue No.s	Sequence of Heavy Chain peptides	Num Exchangers	Relative Uptake	± SD		Relative Uptake	± SD		Relative Uptake	± SD		S.No.	Residue No.s	Sequence of Light chain peptides	Num Exchangers	Relative Uptake	± SD		Relative Uptake	± SD		Relative Uptake	± SD
1	4-14	VQLQESGPGLV	9	-0.851249	0.121725		-0.864858	0.10226		-0.814288	0.120506		1	6-28	VMTQSPAIMSASLGEEITLTCSA	21	-0.486054	0.255448		-0.513627	0.237471		-0.285576	0.183247
2	6-19	LQESGPGLVKPSQS	11	0.168412	0.109058		0.186381	0.06699		0.326884	0.060596		2	8-14	TQSPAIM	5	-0.107829	0.047323		-0.092647	0.063542		-0.076633	0.063266
3	6-20	LQESGPGLVKPSQSL	12	0.259149	0.073994		0.281899	0.105667		0.38641	0.034564		3	8-15	TQSPAIMS	6	0.051489	0.079561		0.025948	0.035323		0.09932	0.033605
4	6-21	LQESGPGLVKPSQSLS	13	0.581456	0.081018		0.311787	0.103901		0.339143	0.043907		4	8-16	TQSPAIMSA	7	-0.092812	0.126255		-0.089996	0.156937		-0.173854	0.122196
5	7-19	QESGPGLVKPSQS	10	0.10409	0.069455		0.154052	0.043312		0.255075	0.059315		5	8-18	TQSPAIMSASL	9	0.013086	0.041353		0.048816	0.087764		-0.108517	0.084087
6	7-20	QESGPGLVKPSQSL	11	0.180142	0.092189		0.180503	0.068632		0.271867	0.073626		6	15-21	SASLGEE	6	0.051704	0.053583		0.041701	0.032728		0.142199	0.031667
7	7-21	QESGPGLVKPSQSLS	12	0.300285	0.072714		0.19807	0.041961		0.267942	0.050318		7	15-26	SASLGEEITLTC	11	0.01261	0.067751		-0.026571	0.052435		0.114807	0.03476
8	19-53	SLSFTWSVIGYSITSGYYWKWIRQFSGNKLEWMGY	34	0.649196	0.319861		0.453045	0.219819		0.741183	0.195055		8	15-52	SASLGEEITLTCSASSSVSYMHWYQQKSGTSPKLLIYS	36	0.150159	0.170034		0.134154	0.181071		0.126715	0.120353
9	29-35	YSITSGY	6	-1.13474	0.035381		-0.948409	0.044322		-0.354277	0.036475		9	15-53	SASLGEEITLTCSASSSVSYMHWYQQKSGTSPKLLIYST	37	0.075741	0.252477		0.165786	0.19278		0.159467	0.163419
10	47-72	KLEWMGYIRYDGSNNYNPSLKNRISI	24	-0.557069	0.132142		-0.596777	0.192005		-0.734907	0.121707		10	30-66	SSVSYMHWYQQKSGTSPKLLIYSTSNLASGVPSRFSG	34	-0.151776	0.20102		0.084399	0.189439		0.089815	0.189079
11	57-72	DGSNNYNPSLKNRISI	14	-0.154366	0.10048		-0.26697	0.066368		-0.035647	0.062877		11	35-48	MHWYQQKSGTSPKL	12	0.008267	0.060262		0.004258	0.085642		0.034319	0.049917
12	61-72	NYNPSLKNRISI	10	0.167102	0.06754		0.26146	0.055041		0.322935	0.064365		12	36-48	HWYQQKSGTSPKL	11	-0.15159	0.092905		-0.199547	0.106849		-0.020114	0.078124
13	78-95	KNQFFLKLNFVTAGDTAT	17	-0.11384	0.100619		-0.211907	0.128131		-0.001415	0.082871		13	38-48	YQQKSGTSPKL	9	-0.246066	0.071683		-0.207847	0.075393		-0.096585	0.050605
14	88-109	VTAGDTATYYCANLYYYSSSPG	20	-0.540998	0.180067		-0.49762	0.201636		-0.233486	0.188429		14	38-50	YQQKSGTSPKLLI	11	-0.236516	0.05893		-0.469341	0.077974		-0.495757	0.072085
15	89-116	TAGDTATYYCANLYYYSSSPGWFPYWGQ	25	-1.82371	0.103728		-1.1801	0.197157		-0.510708	0.036797		15	38-55	YQQKSGTSPKLLIYSTSN	16	-0.362955	0.140134		-0.395721	0.117648		-0.31403	0.129682
16	95-119	TYYCANLYYYSSSPGWFPYWGQGTL	22	-0.823019	0.123232		-0.43844	0.075389		-0.275085	0.044639		16	49-56	LIYSTSNL	7	-0.818085	0.086852		-0.893362	0.086089		-0.443	0.086381
17	101-120	LYYYSSSPGWFPYWGQGTLV	17	-0.519944	0.165943		-0.762657	0.144653		-0.71778	0.272568		17	55-87	NLASGVPSRFSGSGSGTFYSLTISSVEAEDAAD	31	0.215715	0.310045		0.114011	0.285238		0.125275	0.239266
18	103-117	YYSSSPGWFPYWGQG	12	-0.064788	0.113588		-0.41571	0.132499		-0.280346	0.11575		18	57-72	ASGVPSRFSGSGSGTF	14	-0.177384	0.066261		-0.248185	0.070363		0.004415	0.047756
19	112-119	PYWGQGTL	6	-0.148236	0.030439		-0.013442	0.036673		0.006343	0.025179		19	69-83	SGTFYSLTISSVEAE	14	-0.196678	0.113391		-0.425014	0.176929		-0.165325	0.143952
20	122-145	VFAASTKGPSVFPLAPSSKSTSGG	20	-0.136142	0.121541		-0.089974	0.07693		0.027027	0.115831		20	73-79	YSLTISS	6	-0.052143	0.043312		-0.005767	0.033203		0.095198	0.033654
21	125-157	ASTKGPSVFPLAPSSKSTSGGTAALGCLVKDYF	29	0.197485	0.268812		0.313288	0.317		0.672217	0.184124		21	73-80	YSLTISSV	7	0.128761	0.213229		-0.110212	0.080147		0.061931	0.015989
22	147-174	AALGCLVKDYFPEPVTVSWNSGALTSGV	25	0.187065	0.364836		0.192266	0.270963		0.474169	0.167104		22	73-81	YSLTISSVE	8	-0.10068	0.059131		0.064626	0.039891		0.082383	0.040129
23	153-177	VKDYFPEPVTVSWNSGALTSGVHTF	22	0.085873	0.215401		0.24481	0.250794		0.46798	0.302106		23	97-104	TFGGGTKL	7	-0.081565	0.077247		-0.255882	0.069962		-0.124977	0.062008
24	156-168	YFPEPVTVSWNSG	10	0.176045	0.217246		-0.036681	0.258611		0.331322	0.190878		24	113-125	PSVFIFPPSDEQL	9	-0.061399	0.143294		-0.289006	0.11271		-0.307111	0.172431
25	158-176	PEPVTVSWNSGALTSGVHT	16	-0.186586	0.146321		-0.191197	0.378563		0.147811	0.167207		25	127-163	SGTASVVCLLNNFYPREAKVQWKVDNALQSGNSQESV	35	-0.418156	0.256333		-0.890283	0.327612		-0.080383	0.319396
26	180-199	VLQSSGLYSLSSVVTVPSSS	18	-0.162636	0.417859		-0.071842	0.177543		0.49089	0.114473		26	131-160	SVVCLLNNFYPREAKVQWKVDNALQSGNSQ	28	0.045412	0.222604		0.065045	0.203416		0.489908	0.203182
27	187-198	YSLSSVVTVPSS	10	0.015526	0.070263		-0.051955	0.188231		-0.211769	0.05061		27	137-146	NNFYPREAKV	8	-0.207985	0.074236		-0.341576	0.165669		-0.045541	0.067939
28	197-208	SSSLGPQTYICN	10	-0.8879	0.228249		-0.8227	0.205095		-0.90588	0.230741		28	140-158	YPREAKVQWKVDNALQSGN	17	0.688926	0.142401		0.725909	0.208337		0.631379	0.20643
29	202-214	PQTYICNVNHKPS	10	-0.080684	0.130363		-0.113161	0.122583		0.010393	0.11939		29	151-171	DNALQSGNSQESVTEQDSKDS	20	-0.038965	0.268405		0.043897	0.279435		NaN	NaN
30	204-216	TYICNVNHKPSNT	11	0.060325	0.183858		0.086458	0.122192		0.06028	0.201201		30	160-179	QESVTEQDSKDSTYSLSSTL	19	-0.805571	0.371859		-0.707383	0.245285		0.098146	0.174422
31	212-223	KPSNTKVDKKVE	10	-0.163722	0.19431		-0.556453	0.18176		-0.296501	0.159972		31	182-205	SKADYEKHKVYACEVTHQGLSLPV	22	-0.848268	0.295738		-1.17845	0.345651		-0.292813	0.177717
													32	184-207	ADYEKHKVYACEVTHQGLSLPVTK	22	0.353527	0.186656		0.46038	0.171349		0.656866	0.169856
													33	204-213	PVTKSFNRGE	8	-0.023955	0.091027		-0.069431	0.083185		0.353201	0.076533
